# Supplementary material for: Niche partitioning facilitates coexistence of closely related honey bee gut bacteria
Source: eLife journal article supplement (doi:10.7554/elife.68583), 2021-07-19
Supplement: supp [file elife-68583-supp-v2.zip]

— Lapi — Lmel  
— Lhel — Lkul

Isoorientin 2"-O-rhamnoside (m/z 593.15)

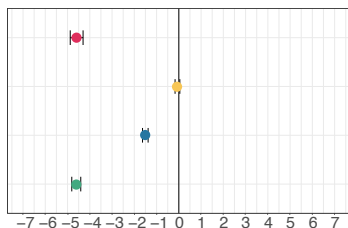

Quercetin 3-O-glucoside (m/z 463.08)

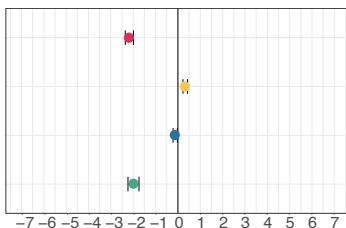

Luteolin\_7-O-(6"-malonylglucoside) (m/z 533.09)

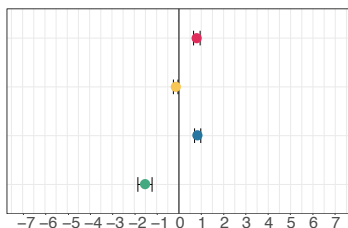

Quercetin 3-O-beta-D-glucosyl-(1->2)-beta-D-glucoside (m/z 625.14)

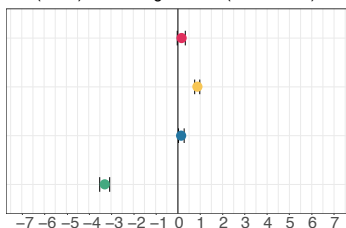

3',5'-Cyclic CMP (m/z 304.03)

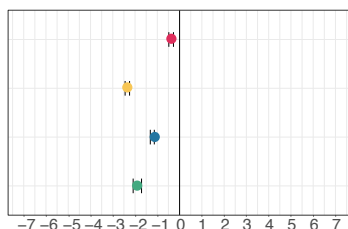

Mannitol (m/z 181.07)

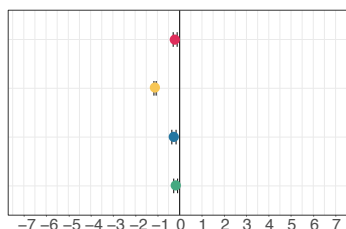

Vitexin (m/z 431.09)

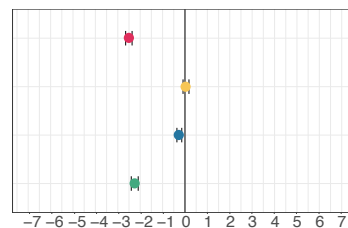

Rutin (m/z 609.14)

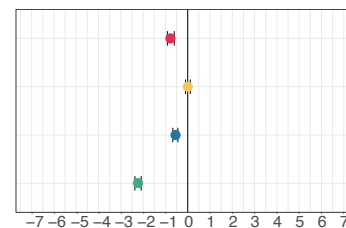

Antirrhinoside (m/z 361.11)

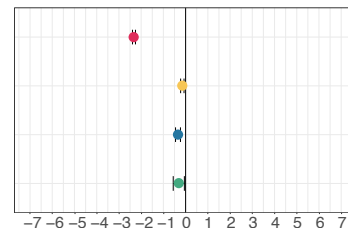

9,10,18-Trihydroxystearate (m/z 331.24)

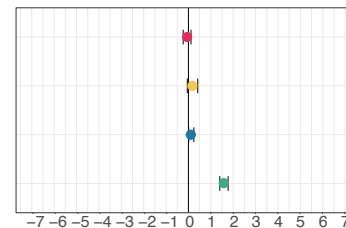

log2FC

log2FC
