# Supplementary material for: Niche partitioning facilitates coexistence of closely related honey bee gut bacteria
Source: eLife. 2021 Jul 19;10:e68583. doi: 10.7554/eLife.68583 (PMC8456714; doi:10.7554/eLife.68583)
Supplement: Supplementary file 10. [file elife-68583-supp10.xlsx]

## Sheet: UM_Data all ions
Annotations									183_t0vst16			184_t0vst16			185_t0vst16			186_t0vst16
ion_ID	ion_m/z	Top_KEGG_annotation	Top_KEGG_compound	Pollen ions	compound_class	#_of_annotations	All_KEGG_annotations	Top_annotation_formula	log2_fold_change	SE	p-value	log2_fold_change	SE	p-value	log2_fold_change	SE	p-value	log2_fold_change	SE	p-value	Significantly changing in 0, 1, 2, 3, 4 strains
1	55.0186	Acrolein	C01471	yes	Organooxygen compounds	2	C01471; C05986	C3H4O	-0.805219	0.180293	8.11582e-05	-0.436817	0.151794	0.00159175	-0.533211	0.161385	0.000824376	-0.612882	0.242931	0.000586852	0
2	57.0343	Acetone	C00207	yes	Organooxygen compounds	6	C00207; C00479; C02001; C11506; C11507; C15508	C3H6O	-0.501582	0.0868036	0.000376916	-0.260866	0.119091	0.00202843	-0.262814	0.151292	0.00886887	-0.400274	0.109288	0.00207269	0
3	58.0057	Potassium acetate	C12554	yes	-	1	C12554	C2H3O2.	-2.93065	0.730369	0.000537673	-2.21602	0.392191	0.000622998	-2.52428	0.490731	0.000113391	-3.19435	0.322283	1.41372e-05	4
4	59.0135	Acetate	C00033	yes	Carboxylic acids and derivatives	2	C00033; C00266	C2H4O2	-1.1959	0.0790512	3.5187e-05	-0.916954	0.103333	2.97039e-06	-0.95118	0.110537	7.4194e-07	-1.11492	0.108717	5.428e-07	2
5	67.0186	3-Butyn-1-al	C06145	yes	Organooxygen compounds	2	C06145; C14275	C4H4O	-2.19972	0.298639	8.06372e-06	-1.57443	0.333448	0.000136245	-0.215569	0.187337	0.04291	-1.96879	0.376756	0.00109211	3
6	69.0343	3-Butyn-1-ol	C06146	yes	-	4	C06146; C17721; C19377; C20701	C4H6O	-0.494711	0.401547	0.0243084	-0.256588	0.209804	0.030953	-0.448129	0.291782	0.0209606	-0.25127	0.182914	0.0296346	0
7	70.0297	Acrylamide	C01659	yes	Carboximidic acids and derivatives	1	C01659	C3H5NO	-0.0973751	0.114315	0.127066	0.00808636	0.178317	0.927899	-0.208205	0.256862	0.125439	-0.017517	0.201667	0.877173	0
8	71.0137	Acrylic acid	C00511	yes	Carboxylic acids and derivatives	5	C00511; C00546; C19246; C19297; C19440	C3H4O2	-1.88233	0.105399	1.17707e-05	-1.5606	0.178958	1.39013e-06	-1.55677	0.23162	4.07345e-05	-1.75442	0.141323	4.34653e-06	4
9	72.0089	Iminoglycine	C15809	yes	-	1	C15809	C2H3NO2	-0.60347	0.255787	0.00133376	-0.563386	0.201336	0.000371301	-0.288042	0.321254	0.0739164	-0.500164	0.196473	0.00391041	0
10	72.0453	Aminoacetone	C01888	no	Organooxygen compounds	4	C01888; C01995; C03134; C05665	C3H7NO	1.61518	0.553588	0.000322926	2.31262	0.263658	0.00025731	1.66378	0.41469	5.78871e-06	2.71537	0.252087	0.000109067	4
11	72.9931	Glyoxylate	C00048	yes	Carboxylic acids and derivatives	1	C00048	C2H2O3	0.433393	0.209681	0.00342525	0.768319	0.204116	0.0031561	0.0733003	0.222403	0.515423	0.310908	0.265009	0.0427724	0
12	73.0294	Propanoate	C00163	yes	Carboxylic acids and derivatives	8	C00163; C00424; C00937; C00969; C05235; C05999; C10920; C17530	C3H6O2	-0.0225897	0.105474	0.677881	0.069719	0.0750188	0.122639	0.0500371	0.118923	0.431445	-0.031801	0.128621	0.644484	0
13	74.0247	Glycine	C00037	yes	Carboxylic acids and derivatives	4	C00037; C01837; C06808; C19445	C2H5NO2	0.320437	0.123858	0.00265633	0.67176	0.110576	3.05838e-05	0.360307	0.136258	0.0082349	0.657796	0.112471	9.26694e-05	0
14	75.0088	Glycolate	C00160	yes	Hydroxy acids and derivatives	1	C00160	C2H4O3	-0.416667	0.135204	0.000339443	-0.330934	0.113076	0.000536288	-0.26412	0.213595	0.0332217	-0.196604	0.121498	0.0339429	0
15	83.0135	4-Hydroxy-2-butynal	C02648	yes	-	4	C02648; C06144; C17601; C17602	C4H4O2	-0.990583	0.189836	7.06361e-06	-0.981033	0.116955	3.60128e-06	-0.847364	0.138401	0.000160412	-1.14522	0.174013	2.32483e-05	1
16	85.0294	Diacetyl	C00741	yes	Organooxygen compounds	9	C00741; C01770; C01771; C02497; C16267; C16835; C19201; C19309; C19443	C4H6O2	-2.0579	0.126657	0.000109665	-1.30257	0.174951	6.71208e-05	-1.37098	0.141958	1.28364e-05	-1.87418	0.138827	8.16511e-05	4
17	85.0658	Prenol	C01390	no	Alcohols and polyols	5	C01390; C01949; C02020; C02223; C07329	C5H10O	1.73257	0.498207	0.000997135	3.22988	0.463829	7.50087e-05	3.01743	0.294448	1.28364e-05	3.38778	0.54065	0.000378217	4
18	87.0087	Pyruvate	C00022	yes	Keto acids and derivatives	4	C00022; C00222; C12069; C20363	C3H4O3	-0.276506	0.116418	0.002731	0.0995483	0.222952	0.40739	-0.0319798	0.170521	0.712304	-0.174939	0.144221	0.038054	0
19	88.0403	L-Alanine	C00041	yes	Carboxylic acids and derivatives	8	C00041; C00099; C00133; C00213; C01401; C01537; C02116; C11488	C3H7NO2	-0.1944	0.0901509	0.00742436	0.0555566	0.112903	0.33076	0.0418432	0.12809	0.535742	-0.0810411	0.0900553	0.126614	0
20	89.0245	Glycerone	C00184	yes	Organooxygen compounds	8	C00184; C00186; C00256; C00577; C01013; C01432; C02154; C02426	C3H6O3	3.98232	0.278133	4.31102e-07	3.61346	0.146877	5.60774e-05	4.19842	0.148637	2.92145e-05	3.85529	0.325191	1.51376e-05	4
21	93.0345	Phenol	C00146	no	Phenols	3	C00146; C01782; C15584	C6H6O	-0.204214	0.0881633	0.00192924	-0.159705	0.121286	0.0256515	-0.067328	0.092767	0.165765	-0.11696	0.12737	0.0966463	0
22	94.0298	2-Hydroxypyridine	C02502	no	Pyridines and derivatives	1	C02502	C5H5NO	-0.113944	0.118887	0.0782856	-0.070416	0.050495	0.037075	-0.151918	0.103422	0.0248972	-0.0720427	0.115688	0.276271	0
23	98.0246	Succinimide	C07273	no	-	2	C07273; C11103	C4H5NO2	0.455461	0.0518939	5.37959e-06	0.71823	0.0788847	5.91874e-05	0.333366	0.083256	0.000211523	0.825984	0.0863708	3.76548e-05	0
24	98.061	N-Methyl-2-pyrrolidinone	C11118	no	Pyrrolidines	2	C11118; C18796	C5H9NO	0.125605	0.116047	0.0524571	0.214487	0.160186	0.0241135	0.185446	0.128413	0.0172566	0.21113	0.155649	0.029685	0
25	100.04	1-Aminocyclopropane-1-carboxylate	C01234	no	Carboxylic acids and derivatives	8	C01234; C02926; C07509; C08267; C11106; C17234; C19456; C19777	C4H7NO2	-0.0737615	0.110197	0.207538	0.00290651	0.101933	0.953856	0.0261086	0.0784974	0.51296	-0.154095	0.109157	0.0222268	0
26	102.019	Pyruvate oxime	C02193	no	-	3	C02193; C11822; C20249	C3H5NO3	-0.187828	0.108595	0.00904911	-0.133777	0.159546	0.130215	-0.112733	0.134851	0.120151	0.0220033	0.174218	0.822175	0
27	102.056	4-Aminobutanoate	C00334	yes	Carboxylic acids and derivatives	12	C00334; C01026; C01205; C02261; C02356; C02721; C03284; C03665; C05145; C11109; C11735; C19514	C4H9NO2	-0.0540919	0.0531909	0.0828147	0.0745357	0.0637365	0.0453425	0.0924954	0.0351405	0.00111531	0.0231166	0.0783692	0.580234	0
28	104.035	L-Serine	C00065	yes	Carboxylic acids and derivatives	3	C00065; C00716; C00740	C3H7NO3	-0.715388	0.0505767	4.56396e-05	-0.356339	0.0886093	7.22734e-05	-0.390735	0.121424	0.000376013	-0.682436	0.10133	5.31726e-06	0
29	105.019	D-Glycerate	C00258	yes	Organooxygen compounds	1	C00258	C3H6O4	-0.0994668	0.0666354	0.0167678	0.0375281	0.0594941	0.2337	0.0788781	0.0974926	0.144904	-0.0865532	0.0989601	0.11919	0
30	105.056	Diethylene glycol	C14689	no	-	1	C14689	C4H10O3	-0.0577238	0.165038	0.493543	-0.0231903	0.236796	0.834919	-0.0447874	0.247075	0.71164	-0.140757	0.30144	0.374772	0
31	107.05	Benzyl alcohol	C00556	no	Benzene and substituted derivatives	6	C00556; C01403; C01467; C01468; C01542; C03485	C7H8O	0.100099	0.106365	0.0947243	0.199342	0.085253	0.0014157	0.0894261	0.0845167	0.066636	0.033423	0.0973071	0.534449	0
32	108.021	p-Benzosemiquinone	C02389	no	-	2	C02389; C05060	C6H5O2	0.357942	0.0958317	0.00033961	0.331844	0.122903	0.0024504	0.699374	0.0753121	7.18861e-07	0.229147	0.136278	0.0139062	0
33	108.045	2-Aminophenol	C01987	no	-	4	C01987; C02372; C02720; C05058	C6H7NO	-0.10165	0.183337	0.285703	-0.100276	0.0997836	0.0708757	-0.143821	0.20537	0.172217	-0.143876	0.20579	0.182767	0
34	109.03	Catechol	C00090	no	Phenols	6	C00090; C00530; C01751; C01785; C11115; C15571	C6H6O2	-0.151571	0.0921205	0.0142533	-0.049254	0.133598	0.484783	-0.207747	0.11848	0.00852192	-0.107633	0.123786	0.118236	0
35	109.041	N-Acetylimidazole	C02560	no	-	2	C02560; C05130	C5H6N2O	-0.203534	0.162169	0.0287589	-0.0945944	0.162573	0.275938	-0.218169	0.315042	0.176536	-0.0794469	0.151721	0.334107	0
36	110.025	2,5-Dihydroxypyridine	C01059	yes	-	5	C01059; C02932; C03056; C03927; C05942	C5H5NO2	-0.905762	0.0902583	8.82142e-07	-0.732106	0.286751	0.00273428	-0.952511	0.123188	9.62547e-07	-0.858743	0.102905	1.98462e-06	0
37	110.036	Cytosine	C00380	yes	Diazines	1	C00380	C4H5N3O	1.11397	0.103069	5.63951e-06	1.10859	0.0780783	4.40321e-08	1.23684	0.132589	0.000194141	0.838273	0.122801	7.72464e-05	3
38	110.061	N-Vinyl-2-pyrrolidone	C19548	no	-	1	C19548	C6H9NO	-0.208274	0.22517	0.101493	0.115045	0.30762	0.448632	-0.126855	0.158104	0.142017	-0.0821602	0.210454	0.443335	0
39	111.009	2-Furoate	C01546	yes	Furans	1	C01546	C5H4O3	-2.02595	0.0758405	1.27055e-06	-1.33271	0.544653	0.00205381	0.152386	0.0663275	0.00204544	-1.92373	0.0910846	3.6959e-06	3
40	111.02	Uracil	C00106	yes	Diazines	2	C00106; C18474	C4H4N2O2	0.15734	0.0586298	0.00161717	0.346802	0.10825	0.0029941	0.686308	0.0770969	4.9334e-05	-0.156621	0.0664831	0.00216378	0
41	112.04	1-Pyrroline-2-carboxylate	C03564	yes	Pyrrolines	4	C03564; C03912; C04322; C07275	C5H7NO2	0.00557978	0.117667	0.927064	0.0507072	0.136419	0.46841	0.102928	0.128675	0.137982	-0.0359963	0.0887237	0.45364	0
42	112.052	Creatinine	C00791	no	Carboxylic acids and derivatives	2	C00791; C19280	C4H7N3O	-0.235761	0.0852253	0.00210424	-0.143852	0.132115	0.0707135	-0.167428	0.178243	0.0862858	-0.15346	0.104211	0.0177575	0
43	113.024	2-Hydroxy-2,4-pentadienoate	C00596	yes	-	2	C00596; C07091	C5H6O3	-2.14723	0.0893141	3.67991e-05	-1.56255	0.215603	6.30339e-07	-1.77262	0.14377	5.65596e-06	-2.02626	0.0999825	1.4907e-05	4
44	113.036	5,6-Dihydrouracil	C00429	yes	Diazines	5	C00429; C02512; C02565; C02777; C08311	C4H6N2O2	-0.519935	0.0909112	6.93212e-05	-0.399843	0.0678842	6.15868e-06	-0.411142	0.0659502	4.9968e-05	-0.41978	0.0695946	1.37952e-05	0
45	114.02	Maleamate	C01596	yes	-	1	C01596	C4H5NO3	-0.344007	0.0433702	0.000143935	-0.12804	0.057664	0.00230171	-0.184506	0.0448353	0.000122238	-0.222348	0.106827	0.0031467	0
46	114.056	L-Proline	C00148	yes	Carboxylic acids and derivatives	4	C00148; C00763; C16435; C18170	C5H9NO2	-0.0876393	0.0765218	0.0466989	0.0827055	0.127747	0.217004	0.00673295	0.112376	0.913615	-0.0189455	0.0788704	0.661416	0
47	115.004	Fumarate	C00122	yes	Carboxylic acids and derivatives	3	C00122; C01384; C02150	C4H4O4	-1.22357	0.123254	0.000143935	-1.02902	0.0961845	1.51564e-07	-1.07807	0.101923	2.09846e-06	-1.24326	0.0717301	4.42804e-06	4
48	115.04	3-Methyl-2-oxobutanoic acid	C00141	no	Keto acids and derivatives	4	C00141; C02233; C03273; C06255	C5H8O3	-0.190876	0.14398	0.0243	-0.190941	0.08241	0.00365295	-0.149922	0.0920955	0.0110883	-0.17449	0.145874	0.0478108	0
49	115.088	5-Aminopentanamide	C00990	yes	Carboxylic acids and derivatives	1	C00990	C5H12N2O	-0.206539	0.107452	0.0145429	-0.474904	0.0738727	5.70729e-06	-0.204365	0.115789	0.00715644	-0.00912797	0.129691	0.902624	0
50	116.035	L-Aspartate 4-semialdehyde	C00441	no	Carboxylic acids and derivatives	4	C00441; C03214; C03508; C20250	C4H7NO3	2.3397	0.0713135	7.46417e-06	2.51435	0.108963	1.34222e-06	1.82573	0.0734193	1.28021e-05	3.05339	0.109468	7.89002e-06	4
51	116.072	L-Valine	C00183	no	Carboxylic acids and derivatives	10	C00183; C00431; C00719; C01799; C01826; C03571; C06417; C07457; C15987; C16436	C5H11NO2	-0.205162	0.0739047	0.000879437	0.036329	0.0664977	0.288309	0.0196019	0.0589685	0.531824	-0.118573	0.038049	0.00136022	0
52	117.019	Succinate	C00042	yes	Carboxylic acids and derivatives	3	C00042; C02170; C10900	C4H6O4	0.545066	0.0847294	5.63951e-06	0.672563	0.13185	0.000719188	0.51882	0.102762	0.000824376	0.586433	0.0959374	1.89947e-05	0
53	117.034	Benzofuran	C14512	yes	Benzofurans	1	C14512	C8H6O	3.04791	0.217166	3.51233e-07	3.05292	0.198091	0.00018009	1.76719	0.16223	1.32549e-05	2.52308	0.0945725	9.60305e-09	4
54	118.051	L-Threonine	C00188	yes	Carboxylic acids and derivatives	8	C00188; C00263; C00820; C02115; C03678; C05519; C11108; C12317	C4H9NO3	-0.630308	0.101454	0.000152698	-0.168911	0.0680496	0.00744918	-0.255943	0.118938	0.0063857	-0.407154	0.0619127	3.83796e-05	0
55	118.981	Mercaptopyruvate	C00957	yes	Keto acids and derivatives	1	C00957	C3H4O3S	-1.74342	0.0927249	4.03136e-05	-0.880604	0.238642	0.000111998	-1.16338	0.26243	1.10453e-05	-1.4897	0.143535	4.33021e-06	3
56	119.035	D-Erythrose	C01796	yes	Organooxygen compounds	4	C01796; C02022; C02045; C06463	C4H8O4	-0.509662	0.0772611	0.000501399	-0.339256	0.0927791	0.000138023	-0.351699	0.0973339	0.000239073	-0.42958	0.0719073	4.3232e-05	0
57	119.05	Phenylacetaldehyde	C00601	no	Benzene and substituted derivatives	8	C00601; C02083; C05627; C06758; C07113; C07209; C07214; C20782	C8H8O	3.13259	0.116302	1.4582e-06	3.30575	0.202403	0.000123754	1.86873	0.119221	5.71669e-05	2.69503	0.123147	2.20077e-06	4
58	120.045	Benzamide	C09815	no	Benzene and substituted derivatives	1	C09815	C7H7NO	-0.301908	0.15268	0.00397534	-0.196535	0.143593	0.0237815	-0.209817	0.0833133	0.00592127	-0.27186	0.126954	0.00486714	0
59	121.03	Benzoate	C00180	no	Benzene and substituted derivatives	6	C00180; C00539; C00633; C03067; C06202; C15474	C7H6O2	-0.0203555	0.0319185	0.238461	-0.0470037	0.0799873	0.255017	-0.396947	0.0761999	2.22986e-05	-0.110199	0.0580763	0.00611594	0
60	121.041	Nicotinamide	C00153	no	Pyridines and derivatives	3	C00153; C01950; C02421	C6H6N2O	-0.121325	0.0613541	0.00613259	-0.1728	0.0676381	0.00257737	-0.320104	0.110248	0.000941631	-0.173291	0.099749	0.0081642	0
61	121.066	Phenylethyl alcohol	C05853	no	Benzene and substituted derivatives	10	C05853; C06757; C07112; C07213; C07216; C11348; C13637; C14385; C14386; C14582	C8H10O	-0.0423652	0.203725	0.691966	-0.113438	0.136012	0.130215	-0.0572	0.192904	0.561284	0.0200565	0.139363	0.792517	0
62	122.025	Nicotinate	C00253	no	Pyridines and derivatives	4	C00253; C06813; C07446; C10164	C6H5NO2	-0.476721	0.109952	6.9953e-05	-0.304627	0.0662555	3.38468e-05	-0.865335	0.137091	2.81335e-06	-0.709954	0.137298	1.3383e-05	0
63	122.061	ortho-Anisidine	C19191	no	-	2	C19191; C19326	C7H9NO	-0.0425638	0.0986307	0.399714	-0.0321528	0.121842	0.606494	-0.0526353	0.152049	0.494554	-0.0264753	0.133382	0.710226	0
64	125.024	1,2,3-Trihydroxybenzene	C01108	yes	Benzene and substituted derivatives	7	C01108; C02183; C02752; C02814; C11101; C11918; C20718	C6H6O3	-0.390803	0.0580622	5.63951e-06	-0.294387	0.0565866	2.35944e-05	-0.376173	0.0995127	0.000230528	-0.321238	0.0876267	0.000621125	0
65	125.097	Sulcatone	C07287	no	Organooxygen compounds	1	C07287	C8H14O	0.0365313	0.0970401	0.475135	-0.0238665	0.147478	0.756809	-0.00345319	0.16982	0.969728	-0.0735219	0.192735	0.480952	0
66	126.019	2,3,6-Trihydroxypyridine	C03458	no	-	2	C03458; C19721	C5H5NO3	0.0553342	0.121334	0.391673	0.297573	0.145241	0.00685788	0.149072	0.133687	0.0806076	0.0565954	0.115256	0.391404	0
67	126.056	(S)-2,3,4,5-Tetrahydropyridine-2-carboxylate	C00450	no	Carboxylic acids and derivatives	6	C00450; C04092; C08268; C08292; C10149; C13694	C6H9NO2	-0.107857	0.0887794	0.0631278	0.0315585	0.162421	0.698341	-0.0638649	0.167106	0.455299	0.00125468	0.101948	0.980421	0
68	127.04	Dihydro-4,4-dimethyl-2,3-furandione	C01125	no	-	7	C01125; C06719; C06761; C11354; C20240; C20443; C20717	C6H8O3	-0.0823484	0.0679879	0.0503096	0.113595	0.163956	0.18955	0.129421	0.128187	0.0723801	0.0247183	0.0672526	0.49285	0
69	127.051	5,6-Dihydrothymine	C00906	no	Diazines	3	C00906; C05715; C05717	C5H8N2O2	-0.110374	0.092103	0.0673953	-0.0983265	0.0654006	0.0302453	-0.118846	0.0733886	0.0172566	-0.126714	0.0585727	0.00269306	0
70	127.076	Ethyl tiglate	C08487	no	Fatty Acyls	7	C08487; C09822; C10921; C10976; C11950; C13714; C13717	C7H12O2	-0.0262428	0.0812166	0.521375	-0.0205115	0.136813	0.762579	-0.0463325	0.0980972	0.360818	0.0293816	0.0743977	0.465669	0
71	128.035	4-Oxoproline	C01877	no	-	5	C01877; C01879; C02237; C04281; C04282	C5H7NO3	-0.148887	0.057322	0.00102293	-0.0412853	0.0433317	0.0868815	-0.0332332	0.0608538	0.30636	-0.0974974	0.0682286	0.0219438	0
72	128.072	L-Pipecolate	C00408	yes	Carboxylic acids and derivatives	5	C00408; C03969; C05936; C07500; C13696	C6H11NO2	-0.224794	0.103156	0.00229048	-0.0148731	0.098803	0.77335	-0.123489	0.119196	0.0650178	-0.194244	0.0617139	0.00136022	0
73	129.019	2,5-Dioxopentanoate	C00433	yes	-	7	C00433; C00490; C01732; C02132; C02214; C02226; C02800	C5H6O4	0.00581133	0.0539086	0.842492	0.420793	0.128257	0.000493627	0.323822	0.109855	0.00119868	-0.0316316	0.0814979	0.468156	0
74	129.055	4-Methyl-2-oxopentanoate	C00233	no	Keto acids and derivatives	14	C00233; C00671; C00902; C01012; C02122; C02129; C03241; C03465; C03467; C03500; C06008; C06102; C12314; C14530	C6H10O3	-0.329638	0.0870422	0.000143935	-0.114427	0.0962881	0.0449781	-0.11242	0.135278	0.124765	-0.0299626	0.100916	0.583349	0
75	129.067	Cucurbitine	C10140	no	-	3	C10140; C19780; C19783	C5H10N2O2	-0.120247	0.179816	0.212932	-0.0447571	0.145181	0.539804	0.0724365	0.11355	0.231783	-0.0485603	0.0963417	0.348135	0
76	129.092	Ethyl isovalerate	C12290	no	Fatty Acyls	3	C12290; C12296; C17714	C7H14O2	-0.34467	0.16229	0.00263037	-0.245046	0.108362	0.00169084	-0.287223	0.134891	0.0042832	-0.263375	0.0769274	0.000174967	0
77	130.051	5-Aminolevulinate	C00430	yes	Carboxylic acids and derivatives	12	C00430; C01015; C01073; C01110; C01157; C01165; C03341; C03440; C03651; C03741; C05147; C19706	C5H9NO3	0.450836	0.0812727	2.7923e-05	0.413441	0.105879	0.000188025	0.356063	0.105477	0.00170932	0.474727	0.083883	1.06795e-05	0
78	131.046	L-Asparagine	C00152	yes	Carboxylic acids and derivatives	8	C00152; C01043; C01905; C02037; C02642; C16438; C19258; C19301	C4H8N2O3	-0.38228	0.0890797	0.000242591	-0.27007	0.0851862	0.000732924	-0.238888	0.109847	0.00267868	-0.303195	0.116499	0.00138094	0
79	131.071	D-2-Hydroxyisocaproate	C03264	yes	Fatty Acyls	4	C03264; C03499; C06103; C07834	C6H12O3	2.29009	0.111155	5.63951e-06	3.79973	0.25784	0.000387335	3.45555	0.106412	3.2158e-05	3.76827	0.166576	1.06795e-05	4
80	131.083	L-Ornithine	C00077	no	Carboxylic acids and derivatives	5	C00077; C00515; C01602; C03943; C11320	C5H12N2O2; C5H12N2O2.	0.0508529	0.0786052	0.22674	0.19592	0.0675529	0.000996801	0.15694	0.0744743	0.00691763	0.187034	0.0826702	0.00392251	0
81	132.03	L-Aspartate	C00049	yes	Carboxylic acids and derivatives	4	C00049; C00402; C16433; C19911	C4H7NO4	-0.308744	0.0946096	0.000422009	-0.0464254	0.0952143	0.338442	0.0443403	0.0912439	0.34901	-0.198363	0.11984	0.0106021	0
82	132.067	N-Hydroxy-L-valine	C20313	yes	-	1	C20313	C5H11NO3	-0.180971	0.105937	0.0116209	0.105402	0.0593314	0.0122624	-0.0715757	0.119001	0.254231	-0.141408	0.0987871	0.0211617	0
83	133.014	(S)-Malate	C00149	yes	Hydroxy acids and derivatives	4	C00149; C00497; C00711; C03064	C4H6O5	-1.66314	0.124351	6.39571e-05	-1.61053	0.136298	1.51564e-07	-1.89207	0.0995904	6.49901e-08	-2.01902	0.0835216	1.06795e-05	4
84	133.051	Deoxyribose	C01801	no	Organooxygen compounds	6	C01801; C02783; C04039; C04272; C06257; C08347	C5H10O4	-0.134615	0.0928672	0.0275068	-0.142727	0.0611086	0.00312518	-0.0519425	0.135496	0.478417	-0.0220258	0.0643894	0.529031	0
85	135.031	Hypoxanthine	C00262	yes	Imidazopyrimidines	1	C00262	C5H4N4O	0.858223	0.0990823	5.38011e-06	1.08327	0.0677451	3.71195e-08	0.738232	0.0960075	0.000242103	1.12821	0.0601587	2.68323e-06	2
86	135.045	Phenyl acetate	C00548	no	Phenol esters	15	C00548; C01454; C03765; C05613; C06224; C07085; C07086; C07189; C07211; C07215; C10700; C10761; C14087; C15583; C20645	C8H8O2	1.0158	0.0731539	1.18039e-06	0.951355	0.113744	0.000103297	0.662282	0.0864203	4.30122e-06	0.611239	0.0440466	1.33376e-07	1
87	136.016	Sodium salicylate	C07587	no	-	1	C07587	C7H5O3.	0.00662867	0.2485	0.958036	0.14106	0.128588	0.0781553	-0.144879	0.298947	0.367191	-0.0835867	0.128871	0.227691	0
88	136.039	Anthranilate	C00108	no	Prenol lipids	6	C00108; C00568; C01004; C14394; C19486; C19597	C7H7NO2	0.122189	0.0841374	0.018579	0.25383	0.0726745	0.000154599	0.116634	0.0859249	0.0231841	0.328793	0.0450235	4.11522e-06	0
89	136.077	Tyramine	C00483	no	Benzene and substituted derivatives	8	C00483; C01183; C02735; C03473; C16570; C18396; C19216; C19376	C8H11NO	-0.235278	0.0665782	0.000232047	-0.193099	0.0842487	0.00289138	-0.256797	0.0995266	0.00112916	-0.153368	0.067988	0.00209986	0
90	139.998	5-Nitrofurfural	C14281	no	-	1	C14281	C5H3NO4	-0.0632077	0.105458	0.277751	-0.110897	0.135315	0.119191	0.00832994	0.121311	0.898739	0.00204611	0.138154	0.977884	0
91	140.072	Ethosuximide	C07505	no	Pyrrolidines	4	C07505; C08287; C10128; C16821	C7H11NO2	-0.0601015	0.136515	0.391502	-0.112961	0.0732661	0.0155008	-0.133783	0.0683589	0.0102953	-0.0130698	0.0936127	0.802731	0
92	140.082	L-Histidinol	C00860	no	Organonitrogen compounds	1	C00860	C6H11N3O	-0.106984	0.0981618	0.0582395	-0.23448	0.167247	0.0309607	-0.0680432	0.103489	0.214613	-0.140014	0.10922	0.0318588	0
93	140.108	Tropine	C00729	no	-	7	C00729; C02066; C06179; C06182; C10864; C11359; C12440	C8H15NO	-0.0859643	0.119409	0.189268	-0.132861	0.116316	0.0470445	-0.116931	0.121221	0.0787858	0.0291952	0.144658	0.719667	0
94	141.067	Ectoine	C06231	no	-	1	C06231	C6H10N2O2	-0.632779	0.080326	1.21377e-05	-0.608553	0.0479321	5.12557e-05	-0.655448	0.0602752	1.95745e-07	-0.586165	0.0395152	5.31726e-06	0
95	141.091	Cycloheptanecarboxylic acid	C12104	no	-	7	C12104; C12297; C16648; C16653; C16654; C19318; C19757	C8H14O2	-0.227152	0.118338	0.00410553	-0.330115	0.143252	0.00450087	-0.262248	0.140813	0.00729343	-0.24222	0.101477	0.00365072	0
96	142.051	2-Hydroxymethylclavam	C17357	no	-	1	C17357	C6H9NO3	-0.0919264	0.0653612	0.0233408	-0.0570239	0.122827	0.362751	-0.0920766	0.118718	0.169881	-0.101775	0.128877	0.14185	0
97	142.087	(E)-4-(Trimethylammonio)but-2-enoate	C04114	yes	-	2	C04114; C10172	C7H13NO2	-0.299473	0.119666	0.00153908	-0.191496	0.0780016	0.00109461	-0.437901	0.0877918	2.60105e-05	-0.3285	0.0722582	8.15721e-05	0
98	143.035	2,3-Dimethylmaleate	C00922	yes	Fatty Acyls	7	C00922; C01757; C02295; C02930; C19821; C19822; C19826	C6H8O4	-1.47727	0.10576	4.44314e-05	-1.23428	0.164471	7.52146e-06	-1.30276	0.129747	1.27866e-07	-1.40681	0.0703039	6.20147e-06	4
99	143.071	trans-4-Hydroxycyclohexanecarboxylate	C04404	no	-	2	C04404; C16590	C7H12O3	-0.127324	0.108244	0.0416747	-0.175904	0.0851086	0.00362782	-0.0203457	0.106439	0.708966	-0.151856	0.155746	0.0996947	0
100	143.083	4-Amino-1-piperidinecarboxylic acid	C16837	no	-	1	C16837	C6H12N2O2	-0.0979761	0.122521	0.168128	0.0254932	0.14083	0.713158	-0.0309176	0.137051	0.65841	0.0961074	0.126644	0.16873	0
101	143.108	Octanoic acid	C06423	no	Fatty Acyls	2	C06423; C07185	C8H16O2	-0.411347	0.113414	0.0011378	-0.325359	0.0763901	4.25411e-05	-0.299693	0.130887	0.00373902	-0.261359	0.0977094	0.000972676	0
102	144.03	2-Oxoglutaramate	C00940	yes	Keto acids and derivatives	2	C00940; C05572	C5H7NO4	-0.347009	0.161795	0.00242243	-0.06689	0.0909171	0.162377	-0.124664	0.0936494	0.0258063	-0.313483	0.130633	0.0044624	0
103	144.045	3-Methyleneoxindole	C02796	yes	-	7	C02796; C06324; C06338; C06343; C06415; C08493; C19434	C9H7NO	0.0421169	0.0729499	0.272553	-0.0334584	0.110105	0.548363	0.0318069	0.107507	0.581739	-0.0115259	0.0996165	0.829021	0
104	144.067	4-Acetamidobutanoate	C02946	yes	Carboxylic acids and derivatives	5	C02946; C03239; C03656; C04076; C05825	C6H11NO3	-0.104715	0.0677469	0.0143134	-0.0358347	0.0728933	0.350744	-0.0553571	0.085808	0.215466	0.033509	0.102298	0.541835	0
105	145.03	Coumarin	C05851	no	Coumarins and derivatives	1	C05851	C9H6O2	-0.0578458	0.136591	0.422747	-0.12295	0.127649	0.0802141	-0.0942475	0.149985	0.231783	0.00877788	0.178255	0.924264	0
106	145.04	1(2H)-Phthalazinone	C14473	no	-	1	C14473	C8H6N2O	-0.167906	0.137334	0.0360077	-0.247903	0.0953421	0.00103052	-0.295851	0.174463	0.00776504	-0.351342	0.100469	0.000154273	0
107	145.05	2-Aceto-2-hydroxybutanoate	C00659	no	-	11	C00659; C00772; C00966; C01053; C04237; C06006; C06104; C06762; C13811; C14463; C16272	C6H10O4; C6H10O4.	-0.133705	0.131047	0.0894968	-0.0632245	0.109614	0.269206	0.120374	0.108631	0.0554241	0.166644	0.130486	0.0339429	0
108	145.062	L-Glutamine	C00064	yes	Carboxylic acids and derivatives	5	C00064; C00303; C00819; C05100; C16673	C5H10N2O3	-0.68263	0.0861049	5.57802e-05	-1.38621	0.0632218	4.20419e-07	-0.397838	0.0981578	7.9951e-05	-0.49991	0.096745	1.54833e-05	1
109	145.098	L-Lysine	C00047	no	Carboxylic acids and derivatives	7	C00047; C00739; C01142; C01186; C05161; C16440; C20277	C6H14N2O2	-0.366002	0.0986996	0.000357853	-0.0327085	0.0645353	0.322975	-0.127501	0.0885506	0.033668	-0.143064	0.0888645	0.0123012	0
110	146.024	Indole-5,6-quinone	C05579	no	Indoles and derivatives	2	C05579; C11129	C8H5NO2	-0.00869654	0.0799675	0.842492	0.0263249	0.114517	0.648633	0.00784708	0.073753	0.841124	-0.0138572	0.109635	0.82066	0
111	146.046	L-Glutamate	C00025	no	Carboxylic acids and derivatives	10	C00025; C00217; C00302; C00979; C03618; C03790; C05574; C05938; C05941; C12269	C5H9NO4	0.267321	0.0622772	0.000116105	0.58063	0.0314856	2.37442e-07	0.334843	0.0664104	0.000567118	0.629131	0.0782488	2.59264e-05	0
112	147.03	D-Arabinono-1,4-lactone	C00652	yes	-	17	C00652; C00684; C00815; C01087; C01114; C02266; C02612; C02614; C02630; C02753; C02994; C03196; C03826; C05405; C06029; C06031; C06032	C5H8O5	0.985523	0.073117	1.10617e-06	1.41509	0.139391	0.000232057	1.16335	0.0834876	2.12581e-05	0.648227	0.0854418	1.71097e-05	2
113	147.046	trans-Cinnamate	C00423	yes	Cin-mic acids and derivatives	7	C00423; C02274; C05608; C07720; C07728; C10438; C17268	C9H8O2	1.40662	0.0510021	7.49191e-06	1.61707	0.113767	8.65035e-05	0.640924	0.0739752	0.000134618	1.20736	0.0751976	1.4975e-06	3
114	147.067	(R)-Mevalonate	C00418	no	Fatty Acyls	7	C00418; C00522; C02104; C03348; C04104; C06007; C06471	C6H12O4	0.391344	0.096745	7.19147e-05	0.570075	0.0679201	1.5737e-05	0.175772	0.0937845	0.0145296	0.438399	0.0599785	2.60231e-05	0
115	148.044	L-Methionine	C00073	yes	Carboxylic acids and derivatives	4	C00073; C00855; C01733; C07418	C5H11NO2S	-0.53021	0.084352	0.000272013	-0.304534	0.0765111	6.79673e-05	-0.362973	0.0966399	9.54976e-05	-0.498235	0.0771251	3.65358e-05	0
116	148.062	N,N-Dihydroxy-L-valine	C20314	yes	-	1	C20314	C5H11NO4	-0.241716	0.120755	0.00535818	-0.182337	0.0771433	0.00354462	-0.00244404	0.0607208	0.939354	-0.398703	0.107483	9.96246e-05	0
117	148.077	D-Cathinone	C08301	yes	-	2	C08301; C17236	C9H11NO	-0.0466109	0.145482	0.512097	-0.113294	0.112807	0.0700137	-0.115052	0.107708	0.0594008	-0.115488	0.189694	0.279163	0
118	148.991	Thiodiacetic acid	C14872	yes	Carboxylic acids and derivatives	1	C14872	C4H6O4S	-0.329245	0.0905233	0.000330923	-0.326213	0.0833405	0.000136613	-0.286979	0.127984	0.00239115	-0.31317	0.0739932	0.00107137	0
119	149.046	D-Ribose	C00121	yes	Organooxygen compounds	26	C00121; C00181; C00216; C00259; C00309; C00310; C00312; C00476; C00508; C01394; C01488; C01508; C01510; C02096; C02204; C02205; C02479; C02604; C05052; C06115; C08346; C08353; C08354; C11476; C16639; C20569	C5H10O5	-0.173367	0.0684974	0.00927052	-0.0943609	0.0598497	0.0126364	-0.100665	0.0714001	0.0195989	-0.0670823	0.0676231	0.0966463	0
120	149.061	Tolylacetate	C01963	no	Phenol esters	9	C01963; C02646; C05629; C13342; C15513; C16706; C17883; C19291; C20697	C9H10O2	-0.0271936	0.0723298	0.468291	0.040657	0.0741799	0.316225	-0.0114371	0.0445278	0.623996	0.0179883	0.0742431	0.655695	0
121	149.097	(-)-Carvone	C01767	no	Prenol lipids	27	C01767; C01868; C01951; C02289; C02485; C02576; C06576; C09840; C09843; C09868; C09884; C09908; C09911; C09913; C11383; C11394; C11939; C14130; C14138; C14139; C14188; C14200; C14464; C14741; C16955; C17062; C18025	C10H14O	-0.096838	0.128725	0.182604	0.00101414	0.170573	0.989863	0.00103867	0.128764	0.985731	0.0217543	0.106513	0.70483	0
122	150.042	Guanine	C00242	yes	Imidazopyrimidines	1	C00242	C5H5N5O	2.19418	0.0766611	2.17094e-06	1.99373	0.0521639	5.05657e-06	2.13413	0.0890635	1.10453e-05	1.86887	0.0755979	1.56595e-05	4
123	151.026	Xanthine	C00385	yes	Imidazopyrimidines	2	C00385; C07599	C5H4N4O2	0.485316	0.0853839	9.27889e-06	0.367668	0.0738953	2.05133e-05	1.16102	0.0681632	2.22986e-05	0.525583	0.0707962	1.11295e-05	1
124	151.061	Xylitol	C00379	yes	Organooxygen compounds	5	C00379; C00474; C00532; C01569; C01904	C5H12O5	-0.215365	0.102618	0.0142533	-0.140806	0.101286	0.0205192	-0.104851	0.140342	0.152908	-0.160739	0.124541	0.0485273	0
125	151.087	4-(Hydroxylamino)-N,N-dimethylaniline	C19681	yes	-	1	C19681	C8H12N2O	-0.242077	0.138937	0.00603571	-0.295996	0.138333	0.00232115	-0.291717	0.280407	0.0646408	-0.167613	0.150042	0.0550821	0
126	152.002	3-Sulfino-L-alanine	C00606	yes	Carboxylic acids and derivatives	1	C00606	C3H7NO4S	0.584987	0.153065	0.000618809	0.442557	0.174563	0.0014157	0.730729	0.172606	0.000644402	0.577835	0.294346	0.00391441	0
127	152.046	1,2-Diamino-4-nitrobenzene	C19384	no	-	2	C19384; C19385	C6H7N3O2	0.105717	0.111272	0.0890357	0.0771061	0.0944483	0.145856	0.166281	0.154479	0.0524579	0.152332	0.156323	0.0977045	0
128	152.071	Dopamine	C03758	yes	Phenols	3	C03758; C04227; C16666	C8H11NO2	-0.0948555	0.132089	0.18018	-0.10294	0.0961886	0.0582252	-0.188163	0.157921	0.0382079	-0.0634422	0.139836	0.398743	0
129	152.083	4-(beta-Acetylaminoethyl)imidazole	C05135	yes	Carboxylic acids and derivatives	2	C05135; C16399	C7H11N3O	-0.0596859	0.248452	0.641613	-0.271037	0.188111	0.0166966	-0.131086	0.17005	0.175084	0.0063659	0.258901	0.963777	0
130	152.996	Propanoyl phosphate	C02876	yes	-	3	C02876; C03505; C03947	C3H7O5P	1.46351	0.0713041	9.26227e-08	2.20211	0.0647279	2.44145e-06	2.16226	0.113523	2.81773e-05	1.65778	0.0934248	9.60305e-09	4
131	154.062	L-Histidine	C00135	yes	Carboxylic acids and derivatives	4	C00135; C00768; C01162; C06419	C6H9N3O2	-0.148929	0.0589851	0.00236142	0.224226	0.0719567	0.000951911	0.0525272	0.061739	0.131385	0.0103611	0.0703311	0.792517	0
132	154.999	2,5-Furandicarboxylate	C20450	yes	-	1	C20450	C6H4O5	-0.137484	0.104113	0.0354666	0.0108015	0.0697824	0.761668	0.114888	0.0689114	0.0151582	-0.152017	0.0823841	0.00636092	0
133	155.035	3-Methyl-cis,cis-hexadienedioate	C04112	no	-	10	C04112; C04171; C04558; C04559; C04634; C06210; C06321; C06760; C18311; C20710	C7H8O4	0.00643146	0.123086	0.923049	0.0909757	0.114988	0.130215	0.0185401	0.14375	0.80832	0.17573	0.146373	0.0440276	0
134	155.046	4-Imidazolone-5-propanoate	C03680	yes	Azoles	4	C03680; C03817; C05568; C19481	C6H8N2O3	0.357115	0.101171	0.000172716	0.686245	0.0753373	2.23401e-05	0.823149	0.130097	1.32549e-05	0.381503	0.0992867	0.000657039	0
135	155.108	Nonane-4,6-dione	C02445	yes	Saturated hydrocarbons	3	C02445; C08471; C08501	C9H16O2	-0.720809	0.105121	5.57802e-05	-0.732172	0.0983429	1.10832e-06	-0.709392	0.132216	0.000407031	-0.72395	0.0696476	6.20147e-06	0
136	156.067	Paramethadione	C07411	yes	Azolidines	4	C07411; C17361; C17724; C20828	C7H11NO3	-0.17645	0.0839669	0.00367555	-0.0163853	0.079895	0.68711	-0.0522099	0.0762691	0.192848	-0.0492549	0.0641951	0.180485	0
137	156.103	Homostachydrine	C08283	no	Carboxylic acids and derivatives	3	C08283; C10155; C12535	C8H15NO2	-0.673076	0.139443	0.00147951	-0.662969	0.0580685	2.7694e-05	-0.662292	0.102746	6.57439e-06	-0.629171	0.0857988	2.97419e-06	0
138	157.05	2-Isopropylmaleate	C02631	no	Fatty Acyls	4	C02631; C04670; C04815; C05126	C7H10O4	0.170239	0.110977	0.0187217	0.194616	0.0869825	0.00194015	0.128382	0.11934	0.0673451	0.0836676	0.134116	0.25236	0
139	157.062	4-Methylene-L-glutamine	C01109	no	-	2	C01109; C16432	C6H10N2O3	-0.153194	0.132445	0.0450258	-0.112931	0.0991569	0.0462534	-0.118074	0.0882376	0.0264791	-0.0571562	0.129336	0.417861	0
140	157.087	Ethyl 3-oxohexanoate	C02975	no	Keto acids and derivatives	3	C02975; C16652; C16655	C8H14O3	-0.193181	0.0967098	0.00585931	-0.147991	0.187892	0.152796	-0.134674	0.142312	0.0870947	-0.106173	0.151927	0.19721	0
141	157.123	Nonanoic acid	C01601	no	Fatty Acyls	1	C01601	C9H18O2	-0.403938	0.0819293	0.000165985	-0.372268	0.111203	0.000290257	-0.331807	0.0494004	8.29676e-06	-0.442981	0.0854954	1.91081e-05	0
142	157.135	N-Nitrosodi-n-butylamine	C19277	no	-	1	C19277	C8H18N2O	-0.380979	0.0703387	1.2794e-05	-0.510564	0.0679737	0.000151517	-0.335528	0.0870056	7.96788e-05	-0.235037	0.0823222	0.00138094	0
143	158.046	4-Methylene-L-glutamate	C00651	yes	Carboxylic acids and derivatives	2	C00651; C03623	C6H9NO4	-0.0884	0.15398	0.279217	-0.0342771	0.109637	0.536465	0.0109549	0.117729	0.862108	0.0839621	0.137399	0.253915	0
144	158.06	Indole-3-acetaldehyde	C00637	no	Indoles and derivatives	4	C00637; C06345; C10663; C14789	C10H9NO	0.42501	0.0625211	1.21377e-05	0.58749	0.0666198	6.15868e-06	0.485698	0.0505532	1.25173e-05	0.239562	0.0645322	0.000336919	0
145	158.082	5-Acetamidopentanoate	C03087	no	Fatty Acyls	4	C03087; C08269; C10151; C10850	C7H13NO3	-0.16158	0.0901411	0.00725255	-0.0806214	0.0645347	0.0449297	0.210502	0.0301929	3.3492e-06	-0.0406231	0.0582498	0.195417	0
146	159.03	2-Oxoadipate	C00322	yes	Keto acids and derivatives	6	C00322; C00846; C04287; C06891; C16159; C20781	C6H8O5	0.0624341	0.055308	0.064085	0.0852919	0.132903	0.228564	0.00637724	0.111139	0.919855	0.112675	0.130908	0.118966	0
147	159.066	Pimelate	C02656	no	Fatty Acyls	3	C02656; C04687; C16657	C7H12O4	0.226054	0.0812602	0.00109595	0.195654	0.105205	0.00956386	0.183629	0.0850437	0.00507097	0.140311	0.0987562	0.0362641	0
148	159.077	D-Alanyl-D-alanine	C00993	yes	Carboxylic acids and derivatives	5	C00993; C03153; C06442; C10996; C19929	C6H12N2O3	-0.406103	0.0974257	5.64794e-05	-0.950852	0.140232	7.20442e-06	-0.196552	0.123324	0.0174756	0.0648733	0.0831592	0.15767	0
149	159.103	Ethyl (R)-3-hydroxyhexanoate	C03864	no	-	7	C03864; C03865; C16649; C16650; C16651; C17527; C20793	C8H16O3	-0.160699	0.0804442	0.00552327	-0.240008	0.0961312	0.000996801	-0.272213	0.0753524	0.000944839	-0.141984	0.157286	0.113819	0
150	160.04	4,8-Dihydroxyquinoline	C05637	no	-	7	C05637; C05639; C06330; C06342; C11503; C16716; C19837	C9H7NO2	0.0103728	0.0737357	0.78789	0.137287	0.108179	0.0292375	0.122426	0.0753449	0.0107272	0.0620239	0.0828276	0.16917	0
151	160.061	L-2-Aminoadipate	C00956	yes	Carboxylic acids and derivatives	9	C00956; C01046; C01077; C02207; C03210; C05016; C06234; C17581; C19694	C6H11NO4	0.213845	0.0576693	0.000334814	0.488073	0.0573636	1.02928e-06	0.390135	0.0562573	1.75017e-05	0.81345	0.0794575	1.36492e-05	0
152	161.045	Lichenin	C00478	yes	-	19	C00478; C01088; C01989; C02360; C02488; C02991; C03652; C03761; C03827; C03979; C06158; C06159; C06474; C06478; C06485; C11592; C16390; C17209; C18028	C6H10O5	-0.472514	0.0725077	0.000200096	-0.438674	0.0968226	3.98986e-05	-0.410484	0.0710884	1.08207e-05	-0.43786	0.0642049	1.96547e-05	0
153	161.093	N6-Hydroxy-L-lysine	C01028	no	-	4	C01028; C02627; C16741; C16742	C6H14N2O3	-0.349695	0.0709881	0.00067758	-0.0877844	0.0624282	0.0309607	-0.194051	0.0498312	0.00038127	-0.15167	0.087458	0.0100239	0
154	161.969	2-Thiophenesulfonamide	C14764	no	-	1	C14764	C4H5NO2S2	0.1789	0.169235	0.0488918	0.481491	0.22607	0.00429088	0.409794	0.200774	0.00279393	0.227734	0.161416	0.02665	0
155	162.056	3-Methyldioxyindole	C05834	no	Indoles and derivatives	2	C05834; C19567	C9H9NO2	0.203522	0.440215	0.340243	0.184897	0.521557	0.437902	0.236671	0.495822	0.308423	0.962924	0.725761	0.00514089	0
156	162.077	Deoxymannojirimycin	C10141	yes	-	7	C10141; C10143; C15478; C15479; C16843; C17580; C20311	C6H13NO4	-0.358459	0.112747	0.00036325	-0.222527	0.179636	0.0744656	-0.287424	0.143277	0.00436863	-0.359316	0.134586	0.0024203	0
157	163.061	L-Rhamnose	C00507	yes	Organooxygen compounds	20	C00507; C00586; C00861; C01018; C01019; C01684; C01721; C02095; C02338; C02431; C02476; C02522; C02781; C07326; C08258; C08259; C08352; C16538; C20835; C20836	C6H12O5	-0.120577	0.0388682	0.0010973	0.00310172	0.0494901	0.903124	-0.0450849	0.083088	0.296238	0.00482196	0.0593718	0.885007	0
158	163.076	p-Cumate	C06578	no	Prenol lipids	9	C06578; C09858; C09904; C09905; C10453; C10469; C12303; C19229; C19729	C10H12O2	-0.104309	0.0549122	0.0112976	-0.0280641	0.0741721	0.46612	0.00229156	0.130073	0.973529	-0.0219076	0.104671	0.707735	0
159	164.058	3-Methylguanine	C02230	no	Imidazopyrimidines	2	C02230; C02242	C6H7N5O	-0.0745833	0.0997776	0.196208	0.120527	0.062286	0.0058757	0.0930724	0.106991	0.137767	-0.0264319	0.12691	0.705896	0
160	164.072	L-Phenylalanine	C00079	yes	Carboxylic acids and derivatives	10	C00079; C02057; C02265; C07527; C18090; C18747; C19565; C19578; C20487; C20488	C9H11NO2	-0.957869	0.0745136	3.86525e-05	-0.842796	0.158248	4.84637e-05	-0.428929	0.0593576	2.92145e-05	-0.700153	0.0650353	2.8328e-06	0
161	165.04	D-Xylonate	C00502	yes	-	6	C00502; C00545; C00878; C01685; C05411; C05412	C5H10O6	0.0937376	0.0546695	0.0173989	0.156613	0.0525235	0.000544226	0.153332	0.0608564	0.00663009	0.18181	0.0729715	0.00136022	0
162	165.056	3-(2-Hydroxyphenyl)propanoate	C01198	no	Phenylpropanoic acids	12	C01198; C01456; C01744; C02201; C02363; C03080; C05581; C05607; C10712; C11380; C11457; C12206	C9H10O3	5.44916	0.580005	8.82142e-07	5.22726	0.31966	8.63511e-05	4.49033	0.215958	4.30122e-06	4.87797	0.59368	3.99841e-06	4
163	166.051	Pyridoxal	C00250	yes	Pyridines and derivatives	9	C00250; C03493; C03986; C05831; C06051; C12323; C14170; C14171; C20821	C8H9NO3	0.0483103	0.101629	0.374295	0.183131	0.147547	0.0360428	0.0474848	0.0892713	0.294689	0.11548	0.103239	0.0777514	0
164	166.074	N-Cyclopropylammeline	C14148	yes	-	1	C14148	C6H9N5O	0.778128	0.306946	0.00264978	0.859057	0.131647	3.89437e-06	0.418056	0.243434	0.0116918	0.528636	0.233767	0.00509557	0
165	166.975	Phosphoenolpyruvate	C00074	no	Organic phosphoric acids and derivatives	3	C00074; C02798; C16849	C3H5O6P	0.109576	0.119949	0.0968397	0.387778	0.23554	0.0202118	0.235461	0.223349	0.0626013	0.0161334	0.242922	0.899309	0
166	167.021	Urate	C00366	yes	Imidazopyrimidines	1	C00366	C5H4N4O3	0.230971	0.100404	0.00192924	0.121755	0.194077	0.245329	0.228586	0.127513	0.00603028	0.0826887	0.279987	0.593984	0
167	167.035	Homogentisate	C00544	no	Benzene and substituted derivatives	15	C00544; C01161; C01839; C03198; C03235; C05343; C05577; C06207; C06672; C07087; C10331; C11527; C14109; C16215; C18346	C8H8O4; C8H8O4.	0.0108943	0.10504	0.843596	0.0475007	0.0473972	0.0743691	0.0176526	0.139787	0.814345	0.0540412	0.128719	0.435015	0
168	167.046	5-Nitro-ortho-anisidine	C19469	yes	-	1	C19469	C7H8N2O3	-0.18506	0.115853	0.0252303	0.0591775	0.0938963	0.227393	-0.117637	0.0650663	0.00701897	0.0308572	0.0560528	0.304816	0
169	167.071	N-Trimethyl-2-aminoethylphosphonate	C06459	no	-	1	C06459	C5H15NO3P	0.361184	0.087958	6.39571e-05	0.416021	0.149266	0.000965072	0.0692343	0.156851	0.389941	0.187653	0.146387	0.0322888	0
170	167.082	Pyridoxamine	C00534	no	Pyridines and derivatives	3	C00534; C11846; C13710	C8H12N2O2	-0.225854	0.0721323	0.000848123	-0.20847	0.0593778	0.00028236	-0.319581	0.0934426	0.000541996	-0.199601	0.0642406	0.000342907	0
171	167.107	6-Oxocineole	C00848	no	-	30	C00848; C02108; C03448; C06069; C08489; C08498; C08546; C09785; C09786; C09804; C09836; C09842; C09854; C11402; C11403; C11414; C11418; C11651; C11937; C11943; C11944; C16461; C18019; C19083; C19731; C20221; C20222; C20223; C20322; C20323	C10H16O2	-0.122796	0.154012	0.146112	-0.298869	0.15154	0.00655046	-0.174165	0.142315	0.066636	-0.127088	0.0786933	0.0216377	0
172	168.012	Thiobenzamide S,S-dioxide	C16285	no	-	1	C16285	C7H7NO2S	-0.149894	0.184232	0.151703	0.0358465	0.159849	0.664078	0.0805178	0.221845	0.460235	-0.207354	0.206167	0.0872082	0
173	168.043	Phosphodimethylethanolamine	C13482	yes	-	1	C13482	C4H12NO4P	-0.0959525	0.076495	0.0328575	0.0321549	0.0539392	0.265971	0.0287754	0.0732827	0.454637	-0.0121029	0.0858778	0.800197	0
174	168.066	Pyridoxine	C00314	yes	Pyridines and derivatives	2	C00314; C00547	C8H11NO3	0.096999	0.0629996	0.0158926	0.126549	0.102366	0.0331823	0.0980519	0.0946943	0.0753429	0.141093	0.0821851	0.0111297	0
175	169.013	Gallate	C01424	yes	Benzene and substituted derivatives	1	C01424	C7H6O5	0.526234	0.0701337	3.14816e-06	1.04376	0.0788862	1.49383e-05	0.964144	0.130518	3.76762e-06	0.631933	0.125838	0.000528785	1
176	169.05	3,4-Dihydroxyphenylethyleneglycol	C05576	no	Phenols	7	C05576; C06720; C06729; C06731; C07123; C16804; C19495	C8H10O4	0.12071	0.0989243	0.0458543	0.123926	0.0900831	0.028085	0.155445	0.099308	0.0210642	0.156532	0.137501	0.0567216	0
177	169.062	N-Nitrosoguvacoline	C19482	no	-	1	C19482	C7H10N2O3	-0.242544	0.0480583	7.20696e-05	-0.199438	0.0878853	0.0029941	-0.181291	0.0447198	6.48452e-05	-0.246878	0.0524296	5.76579e-05	0
178	169.087	Furfural diethyl acetal	C14280	no	-	1	C14280	C9H14O3	-0.144776	0.168237	0.124165	-0.127551	0.133817	0.0986133	-0.17304	0.0900208	0.0101173	-0.183982	0.12141	0.0155179	0
179	169.098	Levetiracetam	C07841	no	Carboxylic acids and derivatives	1	C07841	C8H14N2O2	-0.277741	0.0489306	0.000143935	-0.303722	0.0681608	4.56776e-05	-0.242693	0.0587555	5.25309e-05	-0.158585	0.0629867	0.00129905	0
180	170.057	Metronidazole	C07203	no	Azoles	1	C07203	C6H9N3O3	-0.190441	0.05515	0.000345117	-0.138276	0.0497058	0.000544226	-0.205075	0.0812957	0.00126462	-0.117574	0.111813	0.0684481	0
181	171.006	sn-Glycerol 3-phosphate	C00093	yes	Glycerophospholipids	4	C00093; C00623; C02979; C03189	C3H9O6P	0.583338	0.0725052	7.20242e-06	0.700816	0.135877	3.38468e-05	0.562646	0.129056	0.00111275	0.668303	0.116751	3.83796e-05	0
182	171.041	Hydantoin-5-propionate	C05565	no	Azolidines	2	C05565; C13739	C6H8N2O4	-0.0912007	0.0650172	0.0233408	-0.0941431	0.0761089	0.0400437	0.00193062	0.0924813	0.969728	0.0363997	0.109349	0.543056	0
183	171.103	9-Oxononanoic acid	C16322	no	-	1	C16322	C9H16O3	-1.04537	0.129037	1.65699e-06	-0.931354	0.226682	0.0010471	-0.974818	0.106761	4.71559e-06	-1.28561	0.152072	0.000141647	2
184	171.139	Decanoic acid	C01571	no	Fatty Acyls	4	C01571; C02904; C12289; C12292	C10H20O2	-0.520125	0.15174	0.000270817	-0.472125	0.158207	0.000504108	-0.387148	0.153771	0.00217605	-0.415493	0.151451	0.000644589	0
185	172.061	N-Acetyl-L-glutamate 5-semialdehyde	C01250	yes	Carboxylic acids and derivatives	3	C01250; C12121; C17366	C7H11NO4	-0.0375097	0.0961232	0.448102	0.00368348	0.0631647	0.909325	0.130013	0.0837252	0.0115196	0.139814	0.098929	0.0235509	0
186	172.098	N-Acetyl-L-leucine	C02710	no	Carboxylic acids and derivatives	2	C02710; C10173	C8H15NO3	1.63968	0.0525489	1.00394e-06	1.48979	0.0730985	4.48116e-08	1.37408	0.0693621	2.68754e-09	2.47715	0.0898525	2.09285e-05	4
187	172.11	Indospicine	C08288	no	-	1	C08288	C7H15N3O2	0.398531	0.180797	0.00348628	0.0298333	0.248591	0.806645	0.053384	0.211704	0.600024	0.669401	0.213494	0.000230764	0
188	173.009	cis-Aconitate	C00417	yes	Carboxylic acids and derivatives	3	C00417; C02341; C05422	C6H6O6	0.860885	0.126374	0.000134775	1.1103	0.0779048	9.89475e-06	1.44291	0.122437	6.04896e-05	0.874712	0.153868	0.000138786	2
189	173.104	L-Arginine	C00062	no	Carboxylic acids and derivatives	3	C00062; C00792; C02385	C6H14N4O2	0.000970535	0.0764968	0.980171	0.086479	0.0743922	0.0447352	0.0746909	0.077044	0.091002	0.0986947	0.108705	0.106868	0
190	174.041	N-Acetyl-L-aspartate	C01042	yes	Carboxylic acids and derivatives	3	C01042; C01045; C05520	C6H9NO5	0.325656	0.0774729	5.57802e-05	0.442374	0.096825	2.25976e-05	0.421881	0.0613335	4.86924e-05	0.361925	0.0984941	0.000152163	0
191	174.056	Indole-3-acetate	C00954	no	Indoles and derivatives	9	C00954; C01386; C02298; C03230; C05634; C06331; C06344; C06525; C11504	C10H9NO2	0.361893	0.0988671	0.000132611	0.355252	0.104206	0.00033083	0.408365	0.0648898	5.3735e-06	0.345952	0.074141	2.68522e-05	0
192	174.077	Calystegin B2	C10851	yes	Tropane alkaloids	1	C10851	C7H13NO4	0.11987	0.0646872	0.0062422	0.0576029	0.0711167	0.132885	0.0951214	0.0639739	0.018695	0.0644069	0.0684272	0.0966463	0
193	175.025	Ascorbate	C00072	no	Dihydrofurans	13	C00072; C02670; C03217; C03289; C03387; C04053; C04349; C04471; C06033; C06430; C06440; C19806; C20364	C6H8O6	2.1202	0.182969	0.000400737	1.79662	1.10266	0.0688942	1.00996	0.946264	0.311731	1.9511	0.574949	0.0155179	1
194	175.061	3-Propylmalate	C02123	no	-	4	C02123; C02504; C03328; C04411	C7H12O5	0.411351	0.070838	1.21377e-05	0.447176	0.0798295	0.000369738	0.292882	0.0721314	0.000307719	0.681459	0.0940664	3.22565e-06	0
195	175.072	D-Alanyl-D-serine	C19719	no	-	1	C19719	C6H12N2O4	-0.409408	0.0852984	0.000282305	-0.810863	0.0481036	2.23001e-05	-0.350041	0.0657586	4.7474e-05	-0.226425	0.100233	0.0020304	0
196	176.057	4-Hydroxy-4-methylglutamate	C06034	yes	-	4	C06034; C17576; C20844; C20845	C6H11NO5	0.0785268	0.119219	0.238816	0.266997	0.102577	0.000829459	0.0636893	0.0653039	0.0767547	0.166613	0.119798	0.0221701	0
197	176.082	N'-Nitrosonornicotine	C16452	no	Pyridines and derivatives	1	C16452	C9H11N3O	0.0614282	0.0785798	0.149662	-0.0293332	0.14927	0.712318	-0.0961766	0.176448	0.311012	0.122828	0.15339	0.167875	0
198	177.04	D-Glucono-1,5-lactone	C00198	yes	Organooxygen compounds	22	C00198; C00204; C00273; C00691; C01040; C01115; C01216; C02669; C02692; C02779; C03107; C03269; C03383; C03926; C05394; C05410; C06892; C16737; C17577; C19679; C20251; C20680	C6H10O6	0.00294782	0.0485629	0.91188	0.0867734	0.0375096	0.00175908	0.097849	0.0542501	0.0110218	0.00776293	0.0953632	0.885007	0
199	177.056	Vermelone	C01624	no	-	6	C01624; C02666; C10667; C14784; C20327; C20646	C10H10O3	0.0383751	0.0619191	0.261132	0.0523038	0.0579285	0.102755	0.0844386	0.0655283	0.049314	-0.0420652	0.0817054	0.331832	0
200	177.077	Digitalose	C08235	no	-	2	C08235; C16287	C7H14O5	0.140832	0.111365	0.0384143	0.0699001	0.0997138	0.175431	0.113299	0.105519	0.0577182	0.0885257	0.0731546	0.0538611	0
201	177.091	Methyleugenol	C10454	no	Benzene and substituted derivatives	8	C10454; C10478; C14535; C14709; C17663; C17665; C17666; C17782	C11H14O2	-0.0459208	0.0931697	0.349689	0.0624459	0.089129	0.18955	-0.0577292	0.122237	0.368434	-0.0351396	0.147344	0.661899	0
202	177.103	(S)-6-Hydroxynicotine	C01056	no	-	4	C01056; C03043; C16569; C20361	C10H14N2O	-0.166587	0.111833	0.0166636	-0.214778	0.0808986	0.00264805	-0.205813	0.0890707	0.00155434	-0.14248	0.13445	0.0822633	0
203	178.098	Iproniazid	C11777	no	-	1	C11777	C9H13N3O	0.107257	0.456753	0.715061	-0.0389242	0.110171	0.501594	-0.150696	0.147704	0.0748313	-0.664739	0.555857	0.137186	0
204	179.035	3-(4-Hydroxyphenyl)pyruvate	C01179	no	Benzene and substituted derivatives	7	C01179; C01197; C01405; C01481; C05350; C12623; C13400	C9H8O4; C9H8O4.	0.547127	0.0691582	5.63951e-06	-0.0957819	0.0692465	0.0294987	-0.0755094	0.0694832	0.0724829	0.0348401	0.0502548	0.202175	0
205	179.056	D-Glucose	C00031	yes	Organooxygen compounds	40	C00031; C00095; C00124; C00137; C00159; C00221; C00247; C00267; C00737; C00738; C00764; C00795; C00936; C00962; C00984; C01452; C01487; C01582; C01680; C01719; C01720; C01825; C01906; C01934; C02209; C02336; C02782; C05003; C06152; C06153; C06464; C06465; C06466; C06467; C06468; C08351; C08356; C10906; C15923; C19891	C6H12O6	-0.568627	0.0606443	1.68259e-06	-0.463192	0.0744957	4.99177e-06	-0.43648	0.0622505	3.20008e-06	-0.473761	0.073865	5.4679e-06	0
206	180.066	L-Tyrosine	C00082	yes	Carboxylic acids and derivatives	8	C00082; C01536; C03290; C04368; C06420; C19579; C19712; C20807	C9H11NO3	-0.883024	0.0524026	7.06361e-06	-0.443057	0.132887	0.00114171	-0.402257	0.0621746	4.30122e-06	-0.595441	0.0833024	3.22565e-06	0
207	181.05	3-(4-Hydroxyphenyl)lactate	C03672	no	Phenylpropanoic acids	8	C03672; C03964; C04044; C05582; C05583; C10447; C10680; C12622	C9H10O4	4.6413	0.300909	8.82142e-07	4.18239	0.203366	0.000129451	3.47214	0.112539	4.30122e-06	3.75537	0.295521	3.00407e-05	4
208	181.071	Mannitol	C00392	yes	Organooxygen compounds	6	C00392; C00794; C01489; C01507; C01697; C01722	C6H14O6	-1.10638	0.0492975	1.20145e-05	-0.179868	0.0871485	0.0038539	-0.202635	0.0890485	0.00179128	-0.256969	0.0946951	0.000769359	1
209	182.118	Acetyltropine	C12452	no	-	2	C12452; C12453	C10H17NO2	0.0582986	0.196255	0.579807	-0.0558937	0.145873	0.441276	-0.0190829	0.177288	0.839407	-0.0584854	0.110713	0.327085	0
210	182.993	2-Pyrone-4,6-dicarboxylate	C03671	yes	-	2	C03671; C08476	C7H4O6	-1.02948	0.095499	7.27694e-06	-0.530929	0.184873	0.000584825	-0.622864	0.22792	0.000636445	-0.853969	0.114716	2.44593e-06	1
211	183.006	L-3,4-Dihydroxybutan-2-one 4-phosphate	C15556	no	-	1	C15556	C4H9O6P	-0.421138	0.0900543	4.03136e-05	-0.325175	0.0866285	0.000175458	-0.302256	0.0974979	0.00105824	-0.37875	0.0872873	4.85366e-05	0
212	183.045	Dibenzo-p-dioxin	C07732	yes	-	2	C07732; C14409	C12H8O2	-0.202555	0.231552	0.117026	-0.151878	0.220599	0.218592	-0.19093	0.193724	0.0787858	-0.276734	0.267808	0.0880843	0
213	183.056	Fuberidazole	C18737	no	-	1	C18737	C11H8N2O	1.09556	0.128476	3.07241e-05	1.16152	0.163799	6.06102e-05	0.470702	0.163255	0.0011638	0.698449	0.155633	0.000103376	2
214	183.066	7-Methyl-2-hydroxy-6-oxoocta-2,4-dienoate	C00588	no	Organonitrogen compounds	7	C00588; C04535; C05594; C06582; C10765; C11456; C11588	C5H15NO4P; C9H12O4	0.0200314	0.10627	0.706881	0.0277573	0.111456	0.628767	0.00678156	0.0998585	0.901001	-0.0632617	0.0989284	0.23999	0
215	183.102	5-exo-Hydroxy-1,2-campholide	C03843	no	-	8	C03843; C04718; C06066; C11405; C11419; C19079; C19084; C20324	C10H16O3	-0.322202	0.149492	0.00240977	-0.341846	0.0832877	0.000241458	-0.27205	0.0848142	0.000472639	-0.323953	0.108	0.00175358	0
216	183.139	Citronellyl formate	C12295	no	Fatty Acyls	4	C12295; C13823; C13910; C19420	C11H20O2	-0.710332	0.167386	0.00139869	-0.655583	0.10076	1.11156e-05	-0.670236	0.111115	1.01899e-05	-0.688398	0.181894	5.72478e-05	0
217	184.002	O-Phospho-L-serine	C01005	yes	Carboxylic acids and derivatives	2	C01005; C02532	C3H8NO6P	-0.210413	0.0645988	0.000287987	0.0180366	0.086968	0.681803	-0.0238802	0.0978294	0.644034	-0.144931	0.101493	0.0371661	0
218	184.097	Otonecine	C10356	yes	-	4	C10356; C10858; C12449; C20673	C9H15NO3	-0.220557	0.130689	0.00966489	-0.192085	0.0867925	0.00332528	-0.203968	0.124394	0.0112993	-0.130933	0.121191	0.074323	0
219	184.99	4-Sulfobenzaldehyde	C06679	yes	-	1	C06679	C7H6O4S	-0.794222	0.112554	0.000148687	-0.250606	0.13991	0.0050198	-0.577963	0.11537	5.40385e-05	-0.752292	0.108466	1.11996e-05	0
220	185.057	AMPA	C13672	no	-	1	C13672	C7H10N2O4	-0.617854	0.0642872	0.000122386	-0.60377	0.0512956	3.23677e-07	-0.544643	0.0687278	1.22563e-06	-0.538495	0.111819	2.39082e-05	0
221	185.154	Undecanoic acid	C17715	no	Fatty Acyls	1	C17715	C11H22O2	-0.384273	0.113463	0.00171119	-0.260472	0.124302	0.00343156	-0.285638	0.177727	0.0117524	-0.211752	0.217079	0.0793753	0
222	186.077	6-Acetamido-3-oxohexanoate	C03682	yes	-	4	C03682; C05548; C11842; C12988	C8H13NO4	0.0352518	0.102584	0.503348	0.0330257	0.0747783	0.411041	0.0297398	0.0762829	0.442001	0.0248601	0.140407	0.750289	0
223	186.113	8-Amino-7-oxononanoate	C01092	no	Organooxygen compounds	2	C01092; C12029	C9H17NO3	-0.907934	0.123156	3.20637e-06	-0.673576	0.117648	8.41702e-06	-0.763797	0.129694	5.78308e-06	-0.829371	0.0968194	1.54833e-05	0
224	187.097	Azelaic acid	C08261	no	Fatty Acyls	2	C08261; C17878	C9H16O4	1.26862	1.87192	0.033844	1.49809	1.57789	0.00683392	1.58043	1.91969	0.0293434	2.0761	1.72706	0.0183483	1
225	187.108	Glycyl-leucine	C02155	yes	Carboxylic acids and derivatives	4	C02155; C02727; C03846; C12989	C8H16N2O3	-0.416304	0.100676	0.000193795	-0.963445	0.0973754	6.10506e-07	-0.328658	0.096481	0.00112082	-0.278419	0.104641	0.000816844	0
226	188.002	2-Pyridyl hydroxymethane sulfonic acid	C11327	no	-	1	C11327	C6H7NO4S	0.583901	0.154	0.000388416	0.474146	0.115696	0.00105345	0.428289	0.100215	3.87215e-05	0.418361	0.10092	0.000113422	0
227	188.035	4-Hydroxy-2-quinolinecarboxylic acid	C01717	no	Quinolines and derivatives	6	C01717; C02172; C14800; C14802; C16715; C18621	C10H7NO3	0.190335	0.10768	0.00717206	0.382133	0.103848	9.98334e-05	0.148258	0.136204	0.0544154	0.412601	0.134477	0.000533846	0
228	188.056	N-Acetyl-L-glutamate	C00624	yes	Carboxylic acids and derivatives	3	C00624; C03871; C12109	C7H11NO5	0.449088	0.0528437	2.15967e-05	0.750035	0.0849793	3.98986e-05	0.567213	0.0536817	4.11586e-05	1.1162	0.0938411	4.87025e-05	1
229	188.093	Castanospermine	C02256	yes	-	5	C02256; C06326; C10124; C10132; C11843	C8H15NO4	0.0844785	0.0614477	0.0233189	0.0671151	0.03464	0.00604938	0.549442	0.0426269	2.60637e-06	0.168578	0.088426	0.015591	0
230	188.112	EPTC	C11081	yes	-	2	C11081; C17251	C9H19NOS	-0.44846	0.106979	0.000113299	-0.900578	0.112371	7.96724e-07	-0.313449	0.100212	0.00152181	-0.252395	0.09952	0.00103686	0
231	188.986	3-Sulfocatechol	C06336	yes	-	2	C06336; C06674	C6H6O5S	0.211509	0.0588625	0.000149773	0.212198	0.18041	0.0373578	0.175824	0.158095	0.0538036	0.206628	0.0896115	0.00191192	0
232	189.004	Oxalosuccinate	C05379	yes	Carboxylic acids and derivatives	1	C05379	C6H6O7	0.408188	0.109681	0.000125954	0.335838	0.213273	0.0161018	0.41917	0.0859775	6.43537e-05	0.412431	0.113136	0.000135041	0
233	189.04	3-Dehydroquinate	C00944	yes	Alcohols and polyols	4	C00944; C04049; C05601; C06201	C7H10O6	0.256775	0.106097	0.00135863	0.259693	0.131865	0.00411195	0.278017	0.122279	0.0016965	0.263356	0.0891408	0.00116591	0
234	189.051	N-Carbamyl-L-glutamate	C05829	no	Carboxylic acids and derivatives	2	C05829; C08266	C6H10N2O5	-0.0981134	0.0609648	0.0156834	-0.753108	0.0883568	1.34222e-06	-0.00652013	0.0500955	0.802428	0.00342912	0.116905	0.957661	0
235	189.077	(R)-3-((R)-3-Hydroxybutanoyloxy)butanoate	C04546	no	-	1	C04546	C8H14O5	0.0984792	0.115098	0.161868	0.130349	0.0617847	0.00384141	0.209319	0.094306	0.00539873	0.248443	0.10619	0.00185143	0
236	189.088	LL-2,6-Diaminoheptanedioate	C00666	yes	Carboxylic acids and derivatives	2	C00666; C00680	C7H14N2O4	-0.329023	0.0813307	0.000199925	-0.62056	0.0788448	1.80281e-05	-0.22559	0.0674294	0.000202931	-0.238425	0.0934123	0.00111739	0
237	190.054	N-Acetylmethionine	C02712	yes	Carboxylic acids and derivatives	1	C02712	C7H13NO3S	0.557608	0.0803919	3.67013e-06	0.61546	0.0770316	3.29557e-06	0.195612	0.104073	0.017735	0.995824	0.103643	1.11295e-05	0
238	190.071	2-Amino-3,7-dideoxy-D-threo-hept-6-ulosonic acid	C16850	yes	-	1	C16850	C7H13NO5	0.131939	0.0589955	0.00266732	0.122508	0.0891929	0.0362762	0.201229	0.0910868	0.00661363	0.251084	0.0915286	0.000966184	0
239	190.088	Ephedroxane	C17902	yes	-	1	C17902	C11H13NO2	-0.268539	0.0732056	0.00147951	-0.277687	0.0980065	0.00360009	-0.104981	0.103316	0.0730271	-0.267794	0.100479	0.00110728	0
240	191.02	Citrate	C00158	yes	Carboxylic acids and derivatives	10	C00158; C00311; C00451; C00679; C02780; C03600; C03921; C04575; C04617; C12649	C6H8O7; C6H8O7.	-3.1485	0.107582	5.63951e-06	-2.05125	1.03935	0.00315312	0.236075	0.0993488	0.00180858	-3.03776	0.0866872	6.20147e-06	3
241	192.067	(3-Arylcarbonyl)-alanine	C03450	yes	-	7	C03450; C05598; C06726; C09962; C10581; C16587; C16595	C10H11NO3	-0.229637	0.066345	0.000222687	-0.127438	0.087956	0.0199009	-0.102995	0.119693	0.13834	-0.102896	0.0613822	0.00994303	0
242	193.035	D-Glucuronate	C00191	yes	Organooxygen compounds	15	C00191; C00333; C00558; C00618; C00905; C01062; C02024; C03342; C06472; C06473; C06477; C08348; C08350; C15673; C16245	C6H10O7	-0.0145434	0.0742948	0.69703	-0.116536	0.10351	0.0483412	0.164123	0.115126	0.0340613	-0.0642673	0.120608	0.32887	0
243	193.072	5-O-Methyl-myo-inositol	C03365	yes	Alcohols and polyols	9	C03365; C03619; C03659; C03660; C03844; C05163; C06352; C06353; C08257	C7H14O6	-0.266867	0.0445606	8.62948e-06	-0.208089	0.0757867	0.000623272	-0.171253	0.0883594	0.00633886	-0.218728	0.0941241	0.00239941	0
244	193.087	Zingerone	C17497	no	Benzene and substituted derivatives	2	C17497; C20342	C11H14O3	-0.238225	0.0763068	0.00450282	-0.247696	0.143401	0.00712959	-0.174057	0.0881622	0.00444427	-0.274967	0.11022	0.00138094	0
245	194.093	alpha-[3-(Nitrosoamino)propyl]-3-pyridinemethanol	C19581	no	Pyridines and derivatives	1	C19581	C9H13N3O2	0.15033	0.27174	0.350183	-0.211673	0.0916183	0.00222632	-0.156289	0.102704	0.0282333	-0.0282494	0.293508	0.877173	0
246	195.05	D-Gluconic acid	C00257	yes	Organooxygen compounds	8	C00257; C00514; C00770; C00800; C00817; C00880; C03215; C15930	C6H12O7	-0.0185767	0.0527349	0.497364	-0.0224822	0.0633563	0.493284	0.0034067	0.0679121	0.927234	0.0148076	0.070963	0.701559	0
247	195.066	2,3-Dihydroxy-p-cumate	C06580	yes	-	8	C06580; C07351; C10664; C10684; C10726; C12205; C16778; C17455	C10H12O4	0.180377	0.241647	0.202252	0.241436	0.272623	0.113025	0.363409	0.133694	0.00113836	0.091375	0.253168	0.502006	0
248	195.114	Fasoracetam	C13311	yes	-	1	C13311	C10H16N2O2	-0.0482007	0.0819459	0.279217	0.00708646	0.121043	0.909325	0.0253704	0.107172	0.644034	0.0366763	0.117546	0.56061	0
249	197.01	3,4-Dihydroxyphthalate	C03223	no	-	2	C03223; C03233	C8H6O6	-0.0508601	0.0779453	0.239045	-0.0796264	0.0684756	0.05301	-0.0347344	0.0896422	0.455299	-0.088719	0.0946845	0.101111	0
250	197.021	DNOC	C18653	no	-	1	C18653	C7H6N2O5	-0.195659	0.100452	0.00850211	-0.126849	0.0800697	0.0136628	-0.0511872	0.114898	0.386956	-0.184065	0.147544	0.0339405	0
251	197.096	4-Phenethylphenol	C14340	yes	-	1	C14340	C14H14O	-0.0649094	0.521673	0.811324	-0.107636	0.463379	0.623505	0.0962195	0.442641	0.670284	-0.0544726	0.466215	0.822175	0
252	197.129	Slaframine	C06185	yes	-	1	C06185	C10H18N2O2	-2.98156	0.0935956	1.44818e-05	-2.87172	0.187527	7.719e-08	-2.78193	0.168986	1.13209e-09	-2.82286	0.136735	4.34653e-06	4
253	198.018	O-Phospho-L-homoserine	C01102	yes	Carboxylic acids and derivatives	4	C01102; C05702; C12147; C12215	C4H10NO6P	-0.32269	0.125864	0.00430761	-0.215044	0.204796	0.0498828	-0.0745955	0.179917	0.422094	-0.331739	0.122594	0.000800771	0
254	198.088	gamma-Glutamyl-beta-aminopropiononitrile	C06114	yes	Carboxylic acids and derivatives	1	C06114	C8H13N3O3	-0.502354	0.0735202	1.2794e-05	-0.471801	0.0774268	5.62629e-06	-0.332871	0.0979294	0.000207275	-0.33138	0.136821	0.00121864	0
255	199.072	Dihydroclavaminic acid	C06659	no	-	2	C06659; C17360	C8H12N2O4	-1.24647	0.0671168	5.63951e-06	-1.09909	0.0854293	1.34222e-06	-1.17447	0.063881	2.45145e-07	-1.18286	0.0646475	2.97419e-06	4
256	199.17	Dodecanoic acid	C02679	no	Fatty Acyls	1	C02679	C12H24O2	-0.672919	0.104163	0.000104187	-0.67558	0.165315	3.3182e-05	-0.495174	0.141227	0.000129956	-0.621073	0.213591	0.000379572	0
257	199.969	S-Sulfo-L-cysteine	C05824	no	Carboxylic acids and derivatives	1	C05824	C3H7NO5S2	-0.156071	0.146311	0.0920921	-0.185809	0.194566	0.0763924	-0.0929143	0.11502	0.124056	-0.352473	0.116671	0.000429272	0
258	200.073	Carbaryl	C07491	no	-	3	C07491; C08061; C18833	C12H11NO2	0.179157	0.0683055	0.000889212	0.272837	0.116244	0.00163869	0.224271	0.0677625	0.0002767	0.269419	0.15155	0.00960971	0
259	201.087	Proclavaminic acid	C06658	yes	-	2	C06658; C08271	C8H14N2O4	1.02805	0.111802	6.95513e-05	1.06153	0.090084	9.68595e-05	0.956919	0.069949	5.30733e-06	0.967321	0.106389	0.000128991	2
260	201.112	Sebacic acid	C08277	no	Fatty Acyls	3	C08277; C14566; C17803	C10H18O4	1.35407	0.116558	0.000177683	0.987471	0.237762	6.06102e-05	1.22199	0.167373	9.1668e-07	0.729512	0.529051	0.0343926	2
261	203.056	3-O-Ethyl-L-ascorbic acid	C18342	yes	-	1	C18342	C8H12O6	-0.0298333	0.0812613	0.470034	0.113315	0.092512	0.0503986	0.171751	0.0875922	0.00407553	0.102304	0.0850463	0.0416353	0
262	203.082	L-Tryptophan	C00078	yes	Indoles and derivatives	6	C00078; C00525; C00806; C07839; C10968; C14916	C11H12N2O2	-0.416096	0.0602019	0.000136759	-0.278656	0.0834565	0.000178423	-0.239799	0.0633758	0.000113839	-0.264989	0.0983206	0.00116591	0
263	204.053	Lipoamide	C00248	yes	Dithiolanes	1	C00248	C8H15NOS2	0.353716	0.11991	0.00155756	0.218002	0.157846	0.0424921	0.352743	0.109971	0.00164585	0.314958	0.145046	0.00619282	0
264	204.066	Indolelactate	C02043	yes	Indoles and derivatives	4	C02043; C05660; C09961; C10741	C11H11NO3	3.57647	0.388041	1.51486e-05	3.20128	0.239661	3.23249e-05	3.44036	0.244899	5.60207e-08	2.31121	0.32053	7.34463e-06	4
265	204.124	Pantothenol	C05944	no	Fatty Acyls	1	C05944	C9H19NO4	-2.17295	1.2743	0.0383905	-1.34328	1.08694	0.164245	-2.52566	0.395025	0.00326439	-1.47772	1.27653	0.230219	1
266	205.035	(R)-2-Hydroxybutane-1,2,4-tricarboxylate	C01251	yes	Carboxylic acids and derivatives	4	C01251; C02225; C04593; C05662	C7H10O7	0.186002	0.0933551	0.00388732	0.144267	0.0625544	0.00164282	0.257117	0.0591613	3.94992e-05	0.222664	0.124792	0.0152024	0
267	206.05	S-(2-Hydroxyethyl)-N-acetyl-L-cysteine	C14876	yes	-	1	C14876	C7H13NO4S	-0.158013	0.0544205	0.00232324	-0.271452	0.0416538	2.83389e-05	-0.146085	0.0605389	0.00402116	-0.204876	0.0797211	0.00144492	0
268	206.082	N-Acetyl-L-phenylalanine	C03519	yes	Carboxylic acids and derivatives	5	C03519; C05620; C09933; C09986; C20126	C11H13NO3	0.0962803	0.0957691	0.0863818	-0.125169	0.0525873	0.00289138	-0.0612177	0.0404251	0.0226874	0.421099	0.111565	0.00107137	0
269	206.129	Arenaine	C09912	no	Diazines	2	C09912; C10567	C11H17N3O	-0.328682	0.114872	0.000710571	-0.747307	0.273505	0.00450087	-0.221149	0.1583	0.0197143	-0.177466	0.137377	0.0343926	0
270	207.139	4-Heptyloxyphenol	C14236	no	-	1	C14236	C13H20O2	-0.0263822	0.119326	0.661468	-0.0777318	0.137013	0.271566	0.0275219	0.143698	0.708571	-0.0414004	0.0821755	0.344016	0
271	207.15	Ammodendrine	C10125	no	-	1	C10125	C12H20N2O	-0.358833	0.188894	0.00788851	-0.335819	0.158623	0.00238354	-0.160967	0.222566	0.184927	-0.205441	0.155257	0.02665	0
272	208.108	4-(Methylnitrosamino)-1-(3-pyridyl)-1-butanol	C19574	no	-	1	C19574	C10H15N3O2	-0.10463	0.238325	0.432084	-0.0853939	0.261977	0.531442	-0.324408	0.450931	0.105851	-0.404024	0.176979	0.00182073	0
273	209.03	D-Glucarate	C00818	yes	Organooxygen compounds	2	C00818; C00879	C6H10O8	0.358911	0.0631092	0.000328425	0.288078	0.162612	0.00860702	0.345637	0.102917	0.00215256	0.36076	0.123731	0.000795288	0
274	209.045	5-Hydroxyferulic acid methyl ester	C05619	no	Cin-mic acids and derivatives	1	C05619	C10H10O5	0.541869	0.0752481	1.2794e-05	0.470902	0.134755	0.000133178	0.605975	0.0966007	5.30733e-06	0.537121	0.154855	0.00324898	0
275	209.066	Sedoheptulose	C02076	yes	Organooxygen compounds	4	C02076; C08236; C08355; C19612	C7H14O7	0.0712543	0.082682	0.122134	0.0220031	0.0845549	0.620611	0.24734	0.0667767	0.000104239	0.128412	0.0983585	0.0561119	0
276	209.081	Phosphoagmatine	C02325	yes	Phenols	4	C02325; C02726; C07350; C10709	C11H14O4; C5H15N4O3P	0.0232247	0.136028	0.752433	0.0960453	0.0921038	0.0611853	0.203555	0.0851604	0.00155434	0.0927071	0.0838471	0.0684481	0
277	209.093	Aprobarbital	C07826	no	Diazines	2	C07826; C15986	C10H14N2O3	-0.199386	0.0533303	0.000125954	-0.278382	0.0530084	3.38468e-05	-0.155166	0.0777729	0.00793826	-0.154595	0.0742376	0.0105999	0
278	210.088	Zalcitabine	C07207	yes	Pyrimidine nucleosides	1	C07207	C9H13N3O3	0.231728	0.0878818	0.00420204	0.338493	0.0610278	2.12845e-05	0.467923	0.0822845	0.000194025	0.280922	0.0830844	0.000954283	0
279	211.001	2-Phosphinomethylmalate	C17947	yes	-	1	C17947	C5H9O7P	0.654452	0.082499	1.68259e-06	0.62655	0.0861218	1.53204e-06	0.787407	0.101664	1.40308e-06	0.688394	0.129605	1.41372e-05	0
280	211.026	3-(2-Carboxyethenyl)-cis,cis-muconate	C04366	yes	-	3	C04366; C12624; C18338	C9H8O6	0.263494	0.143597	0.00725255	0.179431	0.098836	0.00748787	0.309082	0.0689765	0.000106003	0.360032	0.111132	0.000475249	0
281	211.06	Danielone	C10674	yes	Benzene and substituted derivatives	2	C10674; C11155	C10H12O5	-0.0555051	0.0986655	0.293729	0.0263371	0.0858456	0.539804	0.000714799	0.0842579	0.985731	-0.0896621	0.110996	0.166275	0
282	211.109	Butabarbital	C07827	yes	Diazines	1	C07827	C10H16N2O3	-0.13084	0.0903076	0.0339875	0.242606	0.0756596	0.000318396	0.0363692	0.0845499	0.401658	-0.03477	0.0612307	0.30253	0
283	211.134	Cucurbic acid	C08482	no	-	4	C08482; C08509; C16309; C16311	C12H20O3	-0.204356	0.114785	0.0138579	-0.339767	0.139677	0.00109686	-0.176232	0.0973725	0.00881036	-0.296146	0.167038	0.00586557	0
284	211.17	cis-11-Methyl-2-dodecenoic acid	C18206	no	-	1	C18206	C13H24O2	-0.253874	0.085937	0.00063136	-0.376325	0.169476	0.00178331	-0.148349	0.0800477	0.0133309	-0.235113	0.241254	0.0973053	0
285	213.017	2-Deoxy-D-ribose 1-phosphate	C00672	yes	Organooxygen compounds	4	C00672; C00673; C11437; C16637	C5H11O7P	1.43438	0.134161	5.64845e-07	1.59783	0.274705	0.00117007	1.67154	0.144978	1.94335e-05	1.25357	0.273661	2.28134e-05	4
286	213.124	Dethiobiotin	C01909	no	Fatty Acyls	1	C01909	C10H18N2O3	-0.382401	0.0922598	0.000253378	-0.0644885	0.105246	0.240263	-0.296572	0.074807	0.000176999	-0.287037	0.0770428	0.000195326	0
287	213.15	3-Oxododecanoic acid	C02367	no	Keto acids and derivatives	1	C02367	C12H22O3	-0.312793	0.0548629	5.9899e-05	-0.259597	0.12326	0.00336922	-0.299853	0.0775271	9.94387e-05	-0.277632	0.0877394	0.000293644	0
288	214.049	sn-Glycero-3-phosphoethanolamine	C01233	yes	Organic phosphoric acids and derivatives	1	C01233	C5H14NO6P	-0.534962	0.0795577	7.49191e-06	-0.506212	0.0648116	1.26395e-06	-0.436615	0.0682058	5.31466e-06	-0.493549	0.0654588	4.8909e-06	0
289	214.108	2-Amino-9,10-epoxy-8-oxodecanoic acid	C12027	yes	-	1	C12027	C10H17NO4	-0.166372	0.06045	0.000639064	-0.0951754	0.114299	0.116659	-0.167643	0.103388	0.0327873	-0.0991454	0.109814	0.115009	0
290	214.979	S-Methyl-3-phospho-1-thio-D-glycerate	C04399	no	-	1	C04399	C4H9O6PS	-0.678323	0.132476	1.62123e-05	-0.629965	0.152492	0.000441007	-0.52764	0.146723	0.000101068	-0.609496	0.160759	7.5197e-05	0
291	215.033	2-C-Methyl-D-erythritol 4-phosphate	C11434	yes	-	1	C11434	C5H13O7P	-3.23866	0.0761846	1.38676e-05	-2.01603	0.2279	9.2633e-07	-2.15346	0.299314	1.27866e-07	-2.76935	0.111519	6.93646e-06	4
292	216.066	(S)-beta-Methylindolepyruvate	C03914	yes	-	2	C03914; C05644	C12H11NO3	0.0568951	0.0942565	0.274457	0.0937408	0.0827784	0.0487578	0.352946	0.0746197	0.000532971	0.0732057	0.0921995	0.145987	0
293	216.099	N-Acetyl-L-citrulline	C15532	yes	Carboxylic acids and derivatives	1	C15532	C8H15N3O4	-0.131789	0.0501738	0.000926972	-1.10609	0.138912	5.32951e-07	-0.07927	0.0400098	0.00969921	-0.0617128	0.0743762	0.131707	1
294	216.135	beta-Alanyl-L-lysine	C05341	yes	Peptidomimetics	2	C05341; C15699	C9H19N3O3	-0.94919	0.0985594	5.63951e-06	-2.77946	0.101455	7.98853e-06	-0.551789	0.106238	1.32549e-05	-0.811328	0.118704	5.31726e-06	1
295	217.102	Thiofanox	C18652	no	-	1	C18652	C9H18N2O2S	-0.877769	0.784012	0.263203	-0.711741	0.0537703	2.37442e-07	-0.253412	0.0621366	0.000177507	-0.254579	0.0980225	0.000994774	0
296	217.119	D-Lysopine	C04020	no	-	1	C04020	C9H18N2O4	-0.379086	0.106082	0.000454359	-0.813354	0.09815	1.60058e-06	-0.355045	0.0917979	0.000465845	-0.258567	0.113415	0.00176729	0
297	218.033	4-Amino-2-methyl-5-phosphomethylpyrimidine	C04556	no	-	1	C04556	C6H10N3O4P	-1.83958	0.0795155	2.85723e-05	-1.29278	0.118689	4.16798e-07	-1.38297	0.169169	7.12042e-07	-1.64648	0.124647	2.99841e-06	4
298	218.067	O-Succinyl-L-homoserine	C01118	yes	-	2	C01118; C03776	C8H13NO6	0.128557	0.0819595	0.0295444	0.0615521	0.0850464	0.169002	0.0541209	0.0835162	0.211162	0.131614	0.0702011	0.00537235	0
299	218.081	Aniracetam	C13355	yes	-	1	C13355	C12H13NO3	-0.340416	0.102296	0.000228285	-0.736332	0.0616589	4.16798e-07	-0.275493	0.0461708	1.32549e-05	-0.169642	0.117269	0.0235509	0
300	218.103	Pantothenate	C00864	yes	Alcohols and polyols	1	C00864	C9H17NO5	0.239952	0.0774386	0.000356495	0.105797	0.0921963	0.0600257	0.291611	0.0521054	0.000285058	0.26678	0.0865123	0.000628718	0
301	218.122	Pentahomomethionine	C17229	yes	-	1	C17229	C10H21NO2S	-0.252182	0.0830885	0.00036325	-0.621158	0.080486	2.4481e-05	-0.221906	0.0863032	0.00111531	-0.106779	0.100631	0.0621892	0
302	219.099	N-Acetyl-beta-D-glucosaminylamine	C01239	no	Organooxygen compounds	1	C01239	C8H16N2O5	-0.0947896	0.0814398	0.0424672	-0.168578	0.0596207	0.000724447	-0.0508233	0.0408549	0.0520388	-0.0603708	0.0904646	0.221723	0
303	220.082	N-Acetyl-D-glucosamine	C00140	yes	Organooxygen compounds	8	C00140; C00645; C01132; C02711; C03136; C03878; C05021; C20328	C8H15NO6	0.084007	0.122505	0.19908	0.018496	0.133702	0.781219	-0.0584735	0.075821	0.153763	0.0986825	0.0909963	0.0587638	0
304	220.099	Metaxalone	C07934	yes	Phenol ethers	3	C07934; C13534; C14291	C12H15NO3; C12H15NO3.	-0.181609	0.122089	0.0174807	-0.168315	0.0918302	0.0087455	-0.146161	0.103464	0.0303436	-0.0823929	0.0943106	0.118966	0
305	220.146	Procarbazine hydrochloride	C07376	no	-	4	C07376; C07402; C10566; C15477	C12H19N3O; C12H19N3O.	-0.0485249	0.126159	0.466075	-0.228922	0.271429	0.139498	-0.20555	0.214353	0.0809388	-0.136496	0.156496	0.115009	0
306	221.066	6-Acetyl-D-glucose	C02655	yes	-	1	C02655	C8H14O7	-0.0495963	0.0648153	0.15728	0.0531559	0.101855	0.301631	-0.0388542	0.0962712	0.43551	0.0108337	0.0779332	0.802731	0
307	221.093	N5-Phenyl-L-glutamine	C20843	yes	-	1	C20843	C11H14N2O3	-0.590709	0.0807431	2.79306e-06	-1.68821	0.104086	2.37442e-07	-0.500458	0.0694806	1.82572e-06	-0.358863	0.0779432	3.11687e-05	1
308	221.118	Dehydrovomifoliol	C02533	no	-	2	C02533; C04223	C13H18O3	-0.254719	0.107517	0.00143939	-0.589565	0.169643	0.000117896	-0.282694	0.136584	0.00704038	-0.337714	0.1804	0.00570158	0
309	221.154	Rishitin	C09715	no	Alcohols and polyols	3	C09715; C16977; C16983	C14H22O2	-0.0917943	0.156035	0.255865	-0.345325	0.219082	0.0296083	-0.264522	0.24713	0.0854832	-0.195383	0.178002	0.0566482	0
310	222.056	Trisphaeridine	C12182	no	-	3	C12182; C14444; C19470	C14H9NO2	-0.0642025	0.085552	0.161868	-0.12959	0.11085	0.0479492	-0.065392	0.0811505	0.137982	-0.0658931	0.128626	0.334486	0
311	223.06	Sinapate	C00482	yes	Cin-mic acids and derivatives	3	C00482; C20653; C20654	C11H12O5	0.146612	0.122349	0.0383905	0.111296	0.0872814	0.0400587	0.134512	0.0939483	0.0258307	0.39415	0.065215	1.97566e-05	0
312	223.073	3-Hydroxykynurenine	C02794	yes	Organooxygen compounds	4	C02794; C03227; C05651; C07312	C10H12N2O4	0.0505015	0.0804076	0.229926	-0.0698499	0.0690295	0.0719889	0.0350332	0.124886	0.576288	0.113635	0.0939957	0.0434694	0
313	223.097	Aspidinol	C10673	no	-	2	C10673; C20417	C12H16O4	0.19701	0.146898	0.0393115	-0.0747343	0.117329	0.21966	0.0060559	0.0920285	0.902389	0.25402	0.112674	0.00885656	0
314	223.134	(6S,9R)-Vomifoliol	C01760	no	-	4	C01760; C04166; C11512; C16318	C13H20O3	-0.133839	0.11801	0.0457507	-0.226459	0.0763116	0.00301164	-0.196749	0.081723	0.00133831	-0.226489	0.101026	0.00267143	0
315	224.067	Ancitabin hydrochloride	C13112	yes	-	1	C13112	C9H11N3O4.	-0.00609765	0.0704101	0.869313	-0.166644	0.100058	0.0136772	-0.0582357	0.0739915	0.146341	0.114254	0.0931799	0.058925	0
316	224.104	1-(Methylnitrosoamino)-4-(3-pyridinyl)-1,4-butanediol	C19577	yes	-	3	C19577; C19580; C19603	C10H15N3O3	-0.423588	0.129102	0.000252011	-0.513103	0.0798053	5.42357e-06	-0.421124	0.138613	0.00120225	-0.313396	0.083395	0.000109067	0
317	225.088	Porphobilinogen	C00931	no	Organonitrogen compounds	2	C00931; C06870	C10H14N2O4; C10H14N2O4.	-0.226361	0.0346434	1.2794e-05	-0.158779	0.0542313	0.000493627	-0.087223	0.0517379	0.00955459	-0.145524	0.0832491	0.0103448	0
318	225.113	Butopyronoxyl	C19142	no	-	1	C19142	C12H18O4	-0.250792	0.0728912	0.000177683	-0.369506	0.121653	0.000594833	-0.112723	0.0604066	0.011227	-0.336144	0.0871602	0.000251291	0
319	225.124	Pentobarbital	C07422	no	Diazines	2	C07422; C07536	C11H18N2O3	-0.322902	0.0412491	4.16785e-05	-0.271344	0.0697634	0.00029547	-0.247439	0.0497989	2.02398e-05	-0.278053	0.0757738	0.000250645	0
320	225.186	Myristoleic acid	C08322	no	Fatty Acyls	1	C08322	C14H26O2	-1.56235	0.212689	0.000339881	-1.60749	0.236432	2.15208e-06	-1.40379	0.152315	3.10505e-07	-1.17688	0.356661	0.000112435	4
321	226.083	Deoxycytidine	C00881	yes	Pyrimidine nucleosides	1	C00881	C9H13N3O4	0.224015	0.0945882	0.00274289	0.230571	0.0653033	0.000260837	0.243381	0.0616843	7.46607e-05	0.267739	0.0991142	0.000664447	0
322	227.035	Euxanthone	C10061	yes	Benzopyrans	1	C10061	C13H8O4	0.0520128	0.14243	0.473248	-0.632242	0.146069	0.000152032	-0.312995	0.109583	0.00113836	-0.00320752	0.0514068	0.910798	0
323	227.067	Deoxyuridine	C00526	yes	Pyrimidine nucleosides	1	C00526	C9H12N2O5	-0.316386	0.0934006	0.000748406	-0.37583	0.0661036	1.73421e-05	-0.262606	0.0933198	0.000607863	-0.271479	0.081343	0.000230764	0
324	227.103	(S)-ATPA	C13733	no	-	1	C13733	C10H16N2O4	-1.56535	0.0523528	1.27055e-06	-1.40805	0.0763793	3.72378e-07	-1.41414	0.0713331	3.17351e-07	-1.40257	0.0652447	9.60305e-09	4
325	227.115	Deoxyguanidinoproclavaminic acid	C06656	no	-	1	C06656	C9H16N4O3	-0.305385	0.0660799	3.96898e-05	-0.240145	0.0844559	0.000446273	-0.272746	0.0563288	2.22626e-05	-0.26706	0.0706008	0.000133199	0
326	227.202	Tetradecanoic acid	C06424	no	Fatty Acyls	1	C06424	C14H28O2	-0.774687	0.130069	0.000510342	-0.673705	0.204318	0.000138734	-0.578211	0.205935	0.000995114	-0.523711	0.287527	0.00545416	0
327	231.098	Boc-Asn	C01410	yes	-	4	C01410; C03415; C04390; C15767	C9H16N2O5	0.152832	0.0809495	0.00542977	0.404718	0.0735043	0.000117896	0.126688	0.0633385	0.0110218	0.335584	0.0717564	0.000190017	0
328	232.069	Bis(1-aziridinyl)morpholinophosphine sulfide	C19347	yes	-	1	C19347	C8H16N3OPS	0.360667	0.119727	0.0010171	0.43306	0.13914	0.000210309	0.46221	0.0923459	3.87215e-05	0.41713	0.110511	0.000251291	0
329	232.137	Hexahomomethionine	C17233	yes	-	1	C17233	C11H23NO2S	-0.164981	0.0942372	0.00781269	-0.636393	0.141891	3.60632e-05	-0.210069	0.11582	0.0109313	-0.106908	0.103363	0.0882163	0
330	233.06	4,5-Dihydroxypyrene	C18250	yes	-	5	C18250; C18263; C18264; C18265; C18266	C16H10O2	0.056246	0.0471112	0.0435566	-0.000827591	0.0935152	0.986324	0.0966983	0.0955332	0.0736812	0.0649557	0.0980017	0.227454	0
331	234.06	Carboxin	C11255	yes	-	1	C11255	C12H13NO2S	0.0660296	0.1544	0.419886	0.118448	0.132407	0.103437	0.216923	0.171794	0.0449807	0.165735	0.14868	0.0535745	0
332	235.061	5,6,7-Trimethoxycoumarin	C09313	yes	-	2	C09313; C09958	C12H12O5	-0.0622507	0.142648	0.397162	-0.0130152	0.151092	0.861738	0.0251504	0.139298	0.72599	0.019	0.121065	0.78842	0
333	235.109	Carbetamide	C11075	yes	-	2	C11075; C11723	C12H16N2O3	-0.570817	0.117759	2.09855e-05	-1.86211	0.0844847	1.5737e-05	-0.611468	0.0982677	8.51477e-06	-0.38235	0.0985649	7.24261e-05	1
334	235.17	Latia luciferin	C02293	no	-	10	C02293; C09627; C09678; C09681; C09700; C09733; C16502; C16946; C17493; C17604	C15H24O2	-0.202834	0.162409	0.0482353	-0.36263	0.135964	0.00205381	-0.307306	0.119237	0.00100757	-0.248695	0.124895	0.00975173	0
335	236.077	N-Acetyl-D-glucosaminate	C01133	yes	-	3	C01133; C03146; C03521	C8H15NO7	-0.0222003	0.0723872	0.548597	-0.107212	0.108684	0.0827697	0.00748666	0.158648	0.931367	-0.0903466	0.0954679	0.0905303	0
336	237.062	3-Deoxy-D-manno-octulosonate	C01187	yes	-	1	C01187	C8H14O8	0.126022	0.0751446	0.0193138	0.0925904	0.111811	0.136395	0.120717	0.111577	0.0604528	0.143394	0.108091	0.0286986	0
337	237.088	Felbamate	C07501	yes	Benzene and substituted derivatives	1	C07501	C11H14N2O4	-0.505779	0.0798286	5.88025e-06	-1.507	0.0703627	1.02928e-06	-0.395825	0.093459	0.000377047	-0.368453	0.0725424	2.39082e-05	1
338	239.003	1,2-Dihydroxynaphthalene-6-sulfonate	C16196	yes	-	1	C16196	C10H8O5S	0.105617	0.0568079	0.0060948	0.167485	0.0952964	0.0102629	0.100025	0.114489	0.105851	0.177815	0.111314	0.0125756	0
339	239.115	Homocarnosine	C00884	no	Peptidomimetics	3	C00884; C01262; C04138	C10H16N4O3	-0.173167	0.27468	0.189269	0.226796	1.15902	0.611669	-0.639115	0.865774	0.106236	0.1651	1.19537	0.769054	0
340	239.14	Pirbuterol	C07807	no	Pyridines and derivatives	1	C07807	C12H20N2O3	-0.47764	0.143162	0.00165558	-0.419794	0.102825	0.000415775	-0.701369	0.125258	2.01727e-05	-0.465714	0.118292	7.16765e-05	0
341	240.099	5-Methyl-2'-deoxycytidine	C03592	yes	Pyrimidine nucleosides	1	C03592	C10H15N3O4	0.0510056	0.113244	0.416786	-0.00225211	0.0532555	0.933308	0.076139	0.157415	0.387266	0.0395133	0.12547	0.562086	0
342	241.083	Thymidine	C00214	no	Pyrimidine nucleosides	2	C00214; C19431	C10H14N2O5	-0.555316	0.0468658	7.49191e-06	-0.53946	0.0710557	1.26395e-06	-0.474106	0.0361468	1.27866e-07	-0.50854	0.0735225	3.99841e-06	0
343	243.027	L-Fuculose 1-phosphate	C01099	yes	-	4	C01099; C01131; C02985; C06369	C6H13O8P	1.4242	0.0640777	1.80424e-05	1.06887	0.169525	0.000619717	1.25315	0.0763125	4.30122e-06	1.42933	0.138955	2.20077e-06	4
344	243.062	Uridine	C00299	yes	Pyrimidine nucleosides	3	C00299; C02067; C16745	C9H12N2O6	-1.57858	0.0575863	8.06372e-06	-1.091	0.560299	0.00956386	-1.13366	0.0545891	2.76624e-09	-1.47821	0.0683304	3.06431e-06	4
345	243.102	Osthol	C09280	yes	-	7	C09280; C09404; C10247; C13626; C13629; C13631; C17425	C15H16O3	0.900433	0.0835887	3.51233e-07	1.04146	0.0937615	2.05828e-06	1.02479	0.0880236	1.95745e-07	1.13444	0.0993365	5.428e-07	3
346	243.114	Etomidate	C07522	no	Azoles	3	C07522; C11847; C19231	C14H16N2O2	-0.0985302	0.0645987	0.01386	0.0562802	0.0622073	0.0937685	-0.0131994	0.0588357	0.661438	-0.010312	0.0608796	0.761731	0
347	243.171	N-(6-Aminohexanoyl)-6-aminohexanoate	C01255	yes	-	2	C01255; C11332	C12H24N2O3	-0.38805	0.134324	0.000388416	-0.920421	0.115138	7.96724e-07	-0.538365	0.170492	0.000518666	-0.272604	0.104552	0.000820385	0
348	244.99	Thiometon	C18665	no	-	1	C18665	C6H15O2PS3	-1.938	0.0738598	8.82142e-07	-1.68575	0.235468	4.16798e-07	-1.67955	0.131019	5.48057e-05	-1.82669	0.215535	5.428e-07	4
349	245.043	Glycerophosphoglycerol	C03274	yes	-	1	C03274	C6H15O8P	0.397534	0.070092	3.06903e-05	0.469928	0.118972	0.000169435	0.969319	0.0636072	7.29051e-07	0.33128	0.0758036	7.16765e-05	0
350	245.114	2,4-Bis(acetamido)-2,4,6-trideoxy-beta-L-altropyranose	C19972	no	-	2	C19972; C20424	C10H18N2O5	0.158972	0.0732963	0.00389384	0.133585	0.079076	0.0123432	0.147115	0.0674759	0.00331018	0.32546	0.0490533	0.000122767	0
351	246.098	Linamarin	C01594	yes	Organooxygen compounds	2	C01594; C19976	C10H17NO6	-0.013609	0.0901985	0.768602	-0.145655	0.324971	0.321957	0.0206323	0.130708	0.756561	-0.00614968	0.124896	0.924264	0
352	247.078	1-Hydroxy-6-methoxypyrene	C18261	yes	-	4	C18261; C18262; C18273; C18274	C17H12O2	-0.310476	0.0698664	0.000298445	-0.282374	0.0793086	0.00234167	-0.133533	0.0861917	0.0310201	-0.1617	0.0913641	0.00746307	0
353	248.078	S-Acetyldihydrolipoamide	C01136	yes	Fatty Acyls	1	C01136	C10H19NO2S2	-0.0143282	0.200587	0.903288	-0.160346	0.301583	0.368853	0.0323783	0.134887	0.650119	0.134792	0.0908861	0.01903	0
354	248.128	Ruspolinone	C10169	yes	-	2	C10169; C15032	C14H19NO3	-0.32006	0.163112	0.00853049	-0.174013	0.133531	0.0475076	-0.20919	0.126696	0.0111344	-0.146474	0.131398	0.0567216	0
355	249.054	gamma-L-Glutamyl-L-cysteine	C00669	yes	Carboxylic acids and derivatives	1	C00669	C8H14N2O5S	0.601013	0.105598	4.03136e-05	0.604419	0.189325	0.00290186	0.51837	0.0876589	1.12486e-05	0.588974	0.13262	2.68522e-05	0
356	249.149	Gemfibrozil	C07020	no	Phenol ethers	10	C07020; C09295; C09689; C09711; C09748; C13453; C13456; C14716; C20403; C20405	C15H22O3	-0.209342	0.101198	0.00503423	-0.271583	0.0839522	0.000719188	-0.231259	0.0960839	0.00266083	-0.504186	0.439988	0.160279	0
357	250.093	Muramic acid	C06470	yes	Organooxygen compounds	1	C06470	C9H17NO7	-0.124678	0.0825575	0.0242082	-0.317764	0.075843	0.00100101	-0.120207	0.0619057	0.00472424	-0.0318291	0.107154	0.57699	0
358	251.164	Cuauhtemone	C09645	no	-	6	C09645; C16504; C17502; C17605; C17607; C17612	C15H24O3	-0.422369	0.150873	0.00522293	-0.424156	0.0931005	0.00010535	-0.321132	0.119756	0.000697933	-0.452505	0.172022	0.000841851	0
359	251.201	Hydnocarpic acid	C16795	no	-	1	C16795	C16H28O2	-0.67522	0.209012	0.000521722	-0.512341	0.342221	0.0197245	-0.314711	0.211379	0.0229695	-0.0812578	0.349693	0.655695	0
360	253.071	L-Arginine phosphate	C05945	yes	Carboxylic acids and derivatives	1	C05945	C6H15N4O5P	0.0572251	0.0826277	0.192414	0.121104	0.105714	0.0452253	0.114384	0.151624	0.153408	0.0722362	0.102701	0.193801	0
361	253.093	3-beta-D-Galactosyl-sn-glycerol	C05401	yes	Glycerolipids	2	C05401; C11546	C9H18O8	-0.20192	0.0761346	0.000883798	-0.126351	0.0673809	0.0047106	-0.271776	0.106419	0.00101181	-0.153538	0.114239	0.0283981	0
362	253.18	Kikkanol A	C17603	no	-	5	C17603; C17606; C17608; C17610; C18538	C15H26O3	-0.387543	0.114189	0.000215314	-0.491335	0.116101	0.00118414	-0.336998	0.167915	0.00499266	-0.294458	0.175278	0.0384898	0
363	253.217	(9Z)-Hexadecenoic acid	C08362	no	Fatty Acyls	1	C08362	C16H30O2	-0.726118	0.273895	0.0025514	-0.733623	0.466392	0.00693604	-0.377585	0.365161	0.0626013	-0.174535	0.654975	0.61594	0
364	254.007	Sulfathiazole	C11169	yes	Benzene and substituted derivatives	1	C11169	C9H9N3O2S2	0.104113	0.0896915	0.0402133	0.282512	0.0774659	0.000116463	0.306107	0.107977	0.000479206	0.0743503	0.132633	0.294181	0
365	254.115	HC Blue No.1	C19247	yes	-	1	C19247	C11H17N3O4	-0.305963	0.11219	0.00411295	-0.31318	0.113775	0.00153344	-0.30332	0.0866759	0.000629477	-0.338474	0.140594	0.00138094	0
366	254.151	L-Pyrrolysine	C16138	no	-	1	C16138	C12H21N3O3	-1.02505	0.158474	8.45444e-05	-1.21855	0.115511	2.15208e-06	-1.19251	0.153087	3.36648e-06	-0.864538	0.174355	3.50836e-05	3
367	255.03	Anthragallol	C10297	yes	-	2	C10297; C10395	C14H8O5	-0.228387	0.0801765	0.000552639	-0.897977	0.148995	0.000164806	-0.449839	0.161662	0.00100829	-0.176235	0.105782	0.00854187	0
368	255.089	N-Acetoxy-IQ	C02328	yes	-	2	C02328; C20290	C13H12N4O2; C15H14NO3.	-0.43399	0.105727	7.36242e-05	-0.387817	0.0935534	4.16647e-05	-0.309605	0.0768701	0.000103119	-0.41203	0.131929	0.000261	0
369	257.175	Dibutyl adipate	C14253	no	-	2	C14253; C14260	C14H26O4	-0.0650412	0.121318	0.349689	-0.103711	0.136351	0.154319	-0.131799	0.157745	0.124056	-0.0380208	0.122151	0.571491	0
370	258.038	D-Glucosamine 6-phosphate	C00352	no	Organooxygen compounds	7	C00352; C01283; C03783; C06156; C06377; C12213; C12214	C6H14NO8P	1.37169	0.490561	0.0237971	1.38125	0.460307	0.0167626	0.761619	0.0800048	2.46361e-05	1.28046	0.669346	0.0697777	0
371	258.11	Linatine	C05939	yes	Carboxylic acids and derivatives	1	C05939	C10H17N3O5	0.999322	0.0665957	2.55709e-06	1.24974	0.133324	0.000242493	0.841479	0.0657828	2.92145e-05	0.875202	0.0605124	3.20393e-05	1
372	260.057	Oxolinic acid	C11342	no	-	1	C11342	C13H11NO5	2.0093	0.0862061	4.31102e-07	1.77647	0.240139	4.20419e-07	2.07852	0.073608	1.16559e-05	1.70926	0.249434	1.4975e-06	4
373	261.125	Methohexital	C07844	yes	Diazines	2	C07844; C09232	C14H18N2O3	-0.189906	0.0867995	0.00236142	0.0934693	0.078396	0.0394206	-0.256875	0.108944	0.00160168	-0.121082	0.082255	0.0181516	0
374	263.14	Feruloylputrescine	C10497	yes	Cin-mic acids and derivatives	1	C10497	C14H20N2O3	-0.206086	0.107526	0.00433492	-0.235651	0.0998926	0.00192706	-0.420951	0.161067	0.00103715	-0.153184	0.074207	0.00372046	0
375	264.144	Esprocarb	C14526	yes	-	1	C14526	C15H23NOS	-0.208088	0.117427	0.0103226	-0.190019	0.0828883	0.00304081	-0.335233	0.0854912	0.000168765	-0.16452	0.0680469	0.00131171	0
376	265.094	8-Oxodeoxycoformycin	C02957	yes	-	1	C02957	C11H14N4O4	-0.679591	0.0441431	7.20164e-06	-0.616199	0.0729349	1.10832e-06	-0.627927	0.0900723	2.78821e-06	-0.661672	0.0982488	1.46272e-05	0
377	266.089	Neuraminic acid	C00212	yes	Purine nucleosides	6	C00212; C00330; C06469; C07195; C07210; C08507	C10H13N5O4; C10H13N5O4.; C9H17NO8	-0.97222	0.068105	7.49191e-06	-0.672711	0.0786758	2.64069e-06	-0.833888	0.104061	4.74588e-06	-0.587989	0.0869711	0.000194005	0
378	266.114	Agaritine	C01550	no	-	1	C01550	C12H17N3O4	-0.0894558	0.0717014	0.0332025	-0.359414	0.0921622	0.000117896	-0.160403	0.0506172	0.00203287	-0.0697596	0.0966512	0.181219	0
379	267.073	Inosine	C00294	yes	Purine nucleosides	1	C00294	C10H12N4O5	-2.02013	0.107403	1.62189e-06	-2.2755	0.113995	7.719e-08	-2.01691	0.150019	1.58501e-08	-2.10966	0.0791702	3.70628e-06	4
380	267.124	Ripazepam	C19518	yes	-	1	C19518	C15H16N4O	-0.112525	0.174398	0.236414	-0.322108	0.235691	0.0202118	-0.13186	0.174866	0.155665	-0.302266	0.232992	0.0339405	0
381	267.146	Histidylleucine	C05010	yes	-	1	C05010	C12H20N4O3	-0.314837	0.0597222	2.26983e-05	-1.33768	0.100789	1.31735e-07	-0.167041	0.0976152	0.0108181	-0.185859	0.0682919	0.000800771	1
382	267.233	omega-Cyclohexylundecanoic acid	C12100	no	Fatty Acyls	2	C12100; C16536	C17H32O2	-0.395636	0.289122	0.0281084	-0.505555	0.379439	0.0204897	-0.182308	0.385526	0.356661	0.00307729	0.625222	0.991647	0
383	268.022	N-Acetyl-L-glutamate 5-phosphate	C04133	no	Carboxylic acids and derivatives	1	C04133	C7H12NO8P	-0.0963113	0.112397	0.111608	0.109304	0.13719	0.139631	0.0549009	0.0835261	0.245759	-0.0209149	0.12614	0.769054	0
384	269.046	Apigenin	C01477	no	Flavonoids	18	C01477; C02495; C06563; C08730; C10023; C10037; C10044; C10113; C10294; C10343; C10369; C10376; C10379; C10397; C14313; C14314; C15222; C16796	C15H10O5	0.324715	0.114749	0.00242243	0.247268	0.106384	0.0020306	0.379581	0.145252	0.00361979	0.322666	0.159299	0.00428311	0
385	269.212	16-Oxo-palmitate	C19614	no	-	1	C19614	C16H30O3	-0.663797	0.134794	0.000252011	-0.91462	0.11245	1.5741e-05	-0.568858	0.103964	8.29676e-06	-0.478672	0.0815411	1.00452e-05	0
386	271.061	Naringenin	C00509	yes	Flavonoids	15	C00509; C01263; C01592; C03567; C06561; C08578; C09047; C09614; C09751; C09826; C12087; C14458; C15567; C16232; C17673	C15H12O5	0.0529525	0.0881613	0.25071	-0.0814734	0.110319	0.162377	0.182058	0.101089	0.00642431	0.124696	0.10172	0.0394792	0
387	271.113	1a,11b-Dihydro-4,9-dimethylbenz[a]anthra[3,4-b]oxirene	C19489	no	-	3	C19489; C19561; C19604	C20H16O	0.0323156	0.0637454	0.337771	0.131527	0.0412471	0.000252259	0.103909	0.0385361	0.000721246	0.243223	0.105419	0.00368576	0
388	271.228	16-Hydroxypalmitate	C18218	no	-	1	C18218	C16H32O3	-0.340269	0.126702	0.00384166	0.0586091	0.076798	0.176081	-0.394451	0.169159	0.00137277	-0.349782	0.131524	0.0023542	0
389	272.162	(2R,3R)-3-Methylglutamyl-5-semialdehyde-N6-lysine	C20279	yes	-	1	C20279	C12H23N3O4	0.164516	0.0906645	0.00613259	-0.66575	0.136789	6.59373e-05	-0.999502	0.11663	2.10083e-06	0.240391	0.0701153	0.000251291	0
390	273.121	N2-Succinyl-L-arginine	C03296	yes	-	1	C03296	C10H18N4O5	0.14909	0.0522176	0.00067758	-0.178194	0.100524	0.0114693	-0.920495	0.0466656	1.34454e-08	0.170985	0.0826723	0.00498047	0
391	273.193	(2R,3R)-3-Methylornithinyl-N6-lysine	C20278	no	-	1	C20278	C12H26N4O3	-0.257482	0.0841851	0.00033999	-0.999426	0.218421	8.48346e-06	-0.255668	0.13889	0.0123727	-0.172664	0.124882	0.0338136	0
392	274.033	6-Phospho-D-glucosaminate	C20589	yes	-	1	C20589	C6H14NO9P	1.71557	0.132258	7.95355e-06	1.68897	0.0847848	2.42399e-05	1.68834	0.142619	0.000134618	2.0223	0.0902094	1.11996e-05	4
393	274.105	(5-L-Glutamyl)-L-glutamine	C05283	yes	Carboxylic acids and derivatives	2	C05283; C18048	C10H17N3O6	0.0745591	0.0759874	0.0742578	-0.219631	0.0980623	0.00201321	0.00279856	0.081819	0.94948	0.355063	0.0766855	3.25458e-05	0
394	275.201	Stearidonic acid	C16300	yes	Fatty Acyls	2	C16300; C19042	C18H28O2	-0.809745	0.143725	0.000177214	-0.819722	0.152724	1.18696e-05	-0.530507	0.108043	0.000447628	-0.777505	0.167084	0.000445713	0
395	276.051	Pyrimidine 5'-deoxynucleotide	C08249	yes	-	1	C08249	C9H14N2O6P	0.90784	0.17737	1.21377e-05	1.03085	0.19185	2.89349e-05	1.01554	0.172828	1.08207e-05	1.09664	0.136193	1.38292e-05	3
396	276.109	S-(2-Methylpropanoyl)-dihydrolipoamide	C04424	yes	Fatty Acyls	1	C04424	C12H23NO2S2	-0.0459709	0.0548624	0.128277	-0.0432863	0.0908399	0.360031	0.0542891	0.105177	0.332224	0.0576212	0.103477	0.302616	0
397	277.112	2-(7'-Methylthio)heptylmalic acid	C17230	yes	-	2	C17230; C17231	C12H22O5S	-0.874984	0.467146	0.00725832	0.247115	0.205882	0.0762188	-0.666802	0.591815	0.049314	-0.73158	0.439836	0.0115882	0
398	277.119	alpha-Ribazole	C05775	yes	Benzimidazole ribonucleosides and ribonucleotides	2	C05775; C18753	C14H18N2O4	0.497168	0.072147	0.000129917	1.07129	0.0885243	0.000104664	1.00164	0.0899976	1.12657e-05	0.871151	0.0849967	6.86773e-05	2
399	277.181	Panaxytriol	C16792	no	Fatty Acyls	1	C16792	C17H26O3	-0.450595	0.204139	0.00187499	-0.80854	0.384753	0.021337	-0.818962	0.512247	0.0232317	-0.577708	0.397126	0.0264825	0
400	277.217	(6Z,9Z,12Z)-Octadecatrienoic acid	C06426	no	Fatty Acyls	6	C06426; C06427; C07289; C08315; C08364; C15201	C18H30O2	-0.810794	0.206269	0.00109595	-1.02804	0.203804	6.13022e-05	-0.913584	0.247844	0.000479206	-0.596095	0.355772	0.00555888	1
401	278.159	Tiocarbazil	C18898	yes	-	1	C18898	C16H25NOS	-0.234061	0.149291	0.0143955	-0.401099	0.110005	0.00024546	-0.4106	0.1628	0.000845046	-0.128008	0.116167	0.0684481	0
402	279.233	Linoleate	C01595	yes	Fatty Acyls	5	C01595; C04056; C08282; C08321; C08459	C18H32O2	-0.376894	0.146863	0.00261042	-0.417988	0.131963	0.000210309	-0.256382	0.158793	0.0178987	-0.150389	0.375647	0.447493	0
403	281.052	9-Riburonosylhypoxanthine	C11631	yes	-	1	C11631	C10H10N4O6	-0.439964	0.0386529	4.86813e-07	-0.285391	0.168971	0.0185919	-0.26265	0.0620787	0.000102812	-0.429987	0.0865779	0.000283794	0
404	281.088	Xylobiose	C01630	yes	Organooxygen compounds	3	C01630; C20568; C20570	C10H18O9	-0.145809	0.0877201	0.00959155	-0.0736113	0.0361113	0.0068934	-0.0879062	0.0597042	0.0270408	-0.11304	0.0471264	0.00147355	0
405	281.175	12-trans-Hydroxy juvenile hormone III	C16508	no	-	1	C16508	C16H26O4	-0.121541	0.0899546	0.0252304	-0.190671	0.139906	0.0225906	-0.148215	0.102742	0.0197143	0.00604064	0.119976	0.924264	0
406	281.212	6-Oxabicyclo[3.1.0]hexane-2-undecanoic acid methyl ester	C15465	no	-	1	C15465	C17H30O3	-0.531751	0.183534	0.00597816	-0.776179	0.131977	2.71693e-05	-0.623443	0.149281	8.54343e-05	-0.655492	0.120968	0.000138786	0
407	282.039	N2-Acetyl-L-aminoadipyl-delta-phosphate	C12987	yes	-	2	C12987; C18402	C8H14NO8P; C9H18NO3PS2	-0.906444	0.0871437	6.95513e-05	-0.611968	0.328185	0.0143068	-0.708621	0.108856	8.57854e-06	-0.758101	0.125755	0.000197867	0
408	282.084	Guanosine	C00387	yes	Purine nucleosides	2	C00387; C08432	C10H13N5O5	-3.99741	0.137654	7.49191e-06	-4.33766	0.133298	8.47371e-07	-3.77389	0.166734	1.13209e-09	-3.78048	0.122337	1.00452e-05	4
409	283.068	Xanthosine	C01762	yes	Purine nucleosides	1	C01762	C10H12N4O6	-1.04456	0.0696474	5.63951e-06	-0.963949	0.0957623	7.25471e-06	-0.940587	0.133856	4.77568e-06	-0.757014	0.108615	1.41372e-05	1
410	283.105	Coformycin	C01677	yes	-	1	C01677	C11H16N4O5	-0.367266	0.102847	0.00118833	-0.319302	0.0941336	0.000653852	-0.234488	0.0901615	0.000874401	-0.216747	0.0837766	0.0024004	0
411	283.227	2-Methoxy-5Z-hexadecenoic acid	C13792	no	-	3	C13792; C13946; C14996	C17H32O3	-0.830613	0.150201	0.000350089	-1.02393	0.0610195	3.71195e-08	-0.754819	0.117273	2.24641e-05	-0.736781	0.124057	0.000334	1
412	284.032	Riccionidin A	C08728	yes	-	1	C08728	C15H9O6	-0.534063	0.0726188	4.45291e-05	-0.708264	0.087517	9.99677e-07	-0.302255	0.0850422	0.000321479	-0.402389	0.0662417	1.21195e-05	0
413	284.125	HC Blue No. 2	C19429	no	-	1	C19429	C12H19N3O5	-0.683946	0.0510404	5.61986e-06	-0.747428	0.0683581	2.29422e-05	-0.723026	0.0762751	4.30122e-06	-0.555707	0.0690881	2.20077e-06	0
414	284.162	Leu-Gly-Pro	C01833	yes	-	1	C01833	C13H23N3O4	-0.102481	0.070272	0.0210265	-0.54306	0.109262	1.64694e-05	-0.13974	0.108164	0.0342835	0.0490964	0.0609602	0.14687	0
415	285.04	Luteolin	C01514	yes	Flavonoids	12	C01514; C05903; C08576; C08720; C10036; C10041; C10097; C10184; C10510; C12134; C17786; C17810	C15H10O6	0.779969	0.257737	0.00121713	4.54326	0.602639	0.000144274	4.62315	0.331695	0.00110656	3.55424	0.60548	1.41372e-05	3
416	285.207	2,3-Dihydroxycyclopentaneundecanoic acid	C14987	no	-	2	C14987; C19615	C16H30O4	-0.243964	0.123888	0.0125521	-0.152208	0.135034	0.0438598	-0.179088	0.0970389	0.00560229	-0.0950773	0.129497	0.180359	0
417	286.066	Sulmazole	C13749	yes	-	1	C13749	C14H13N3O2S	0.66246	0.0460896	1.32293e-07	1.42376	0.178404	0.00066233	1.50717	0.165511	0.000251936	1.08752	0.116183	5.72274e-06	3
418	286.104	Clavamycin E	C17365	yes	-	1	C17365	C11H17N3O6	-0.42934	0.114525	0.00013901	-0.689841	0.329122	0.00621014	-0.863364	0.0631173	9.41436e-07	-0.873637	0.072256	2.24491e-05	0
419	287.087	Iprobenfos	C15230	yes	Benzene and substituted derivatives	1	C15230	C13H21O3PS	0.804704	0.109555	0.000219408	0.781779	0.069736	6.22109e-05	0.804142	0.0595373	4.30122e-06	0.97225	0.0799379	2.20077e-06	0
420	289.181	ML-236C	C14043	yes	-	1	C14043	C18H26O3	-0.0469189	0.099159	0.361838	-0.458936	0.10969	7.81468e-05	-0.242449	0.133121	0.00776504	-0.0804783	0.134076	0.262259	0
421	290.088	2,7-Anhydro-alpha-N-acetylneuraminic acid	C04521	yes	-	3	C04521; C04580; C08341	C11H17NO8	0.162503	0.0519686	0.000308446	0.0773666	0.0681128	0.0507928	0.159837	0.0838643	0.0136243	0.213311	0.0859302	0.00247502	0
422	291.015	5-(3-Hydroxy-4-acetoxybut-1-ynyl)-2,2'-bithiophene	C04711	yes	-	1	C04711	C14H12O3S2	1.48625	0.127504	1.56441e-07	1.38721	0.119564	1.51564e-07	1.50784	0.111624	1.37947e-05	1.45207	0.179258	5.64948e-07	4
423	291.057	Etrimfos	C18985	yes	Organic thiophosphoric acids and derivatives	1	C18985	C10H17N2O4PS	0.0873156	0.124514	0.18605	0.156855	0.131583	0.0373578	0.149754	0.133718	0.0476656	0.17256	0.123278	0.0276854	0
424	291.195	12-OPDA	C01226	no	-	9	C01226; C04672; C08319; C13816; C14911; C16319; C16320; C16324; C16325	C18H28O3	-0.311585	0.087745	0.000149773	-0.513324	0.120863	0.000223108	-0.37026	0.0988876	0.000322452	-0.408409	0.138802	0.00192225	0
425	292.104	N-Acetylmuramate	C02713	yes	Organooxygen compounds	1	C02713	C11H19NO8	-0.032192	0.0423772	0.16444	-0.120733	0.0692981	0.00721746	0.0929101	0.0837993	0.0516675	-0.0527352	0.0887632	0.284327	0
426	293.099	N-Glycosyl-L-asparagine	C03411	yes	-	1	C03411	C10H18N2O8	-0.0828116	0.057609	0.0186909	-0.0444362	0.102536	0.40639	-0.0751863	0.129513	0.261354	-0.00695599	0.0937216	0.895337	0
427	293.115	Aspartame	C11045	yes	Carboxylic acids and derivatives	1	C11045	C14H18N2O5	0.0406602	0.0870681	0.36204	-0.197815	0.0644466	0.000455581	0.0483919	0.0600884	0.13883	0.201369	0.0610396	0.000291027	0
428	293.176	Phytuberin	C09709	no	Prenol lipids	3	C09709; C10342; C10462	C17H26O4	-0.272659	0.326796	0.218303	-0.553184	0.2109	0.00416448	-0.218938	0.252931	0.112741	-0.102985	0.197633	0.331226	0
429	293.212	(9Z)-(13S)-12,13-Epoxyoctadeca-9,11-dienoic acid	C04594	no	-	11	C04594; C04780; C13798; C14765; C14766; C16316; C16326; C16342; C16346; C19613; C19827	C18H30O3	-1.03009	0.118088	1.60707e-05	-1.36929	0.0938064	9.03061e-06	-1.02668	0.213888	1.05047e-05	-1.01151	0.154659	5.33584e-06	4
430	295.227	(9Z,12Z)-(8R)-Hydroxyoctadeca-9,12-dienoic acid	C08318	no	-	7	C08318; C08368; C14762; C14767; C14825; C14826; C19617	C18H32O3	-1.5535	0.258028	0.000532849	-2.53687	0.134037	2.05133e-05	-1.47571	0.283977	3.36648e-06	-2.19615	0.251859	0.000374591	4
431	296.072	Albendazole sulfone	C16626	yes	Benzimidazoles	3	C16626; C19472; C19475	C12H15N3O4S; C20H11NO2	-0.34204	0.0896316	0.000915015	-2.71225	0.104231	2.29422e-05	-2.70591	0.148335	5.30733e-06	-1.49604	0.112828	3.99841e-06	3
432	297.022	1-Pyrenylsulfate	C18269	yes	-	1	C18269	C16H10O4S	0.183532	0.0789046	0.00179052	0.0981185	0.0943094	0.060646	0.321948	0.095765	0.00152335	0.363948	0.135256	0.000844405	0
433	297.062	D-Prephenyllactate	C00994	yes	-	1	C00994	C13H14O8	0.0464887	0.120727	0.450975	-0.275192	0.150749	0.00663163	0.023243	0.134074	0.731541	-0.0307289	0.104346	0.58575	0
434	297.107	10-(beta-Dimethylaminopropionyl)phenothiazine	C17619	yes	-	2	C17619; C20674	C11H16N5O5; C17H18N2OS	0.113593	0.0617016	0.00624289	0.0984221	0.0449604	0.00331377	0.139337	0.0580838	0.00318846	0.170092	0.123345	0.0369897	0
435	297.243	2-Oxooctadecanoic acid	C00869	no	-	5	C00869; C08365; C13791; C19418; C19616	C18H34O3	-1.28066	0.222727	0.000901898	-1.77844	0.127307	1.7837e-05	-1.21568	0.253791	8.29676e-06	-0.996638	0.336155	0.00191192	3
436	298.071	D-4'-Phosphopantothenate	C03492	no	Carboxylic acids and derivatives	1	C03492	C9H18NO8P	0.303858	0.0718132	0.000138426	0.187001	0.0799013	0.0017147	0.278786	0.100934	0.00201339	0.324563	0.0895093	0.000130602	0
437	298.091	7-Methylxanthosine	C16352	yes	-	1	C16352	C11H15N4O6	0.133382	0.106467	0.0435566	0.14132	0.109788	0.0314843	0.155117	0.154211	0.0843361	0.284589	0.116154	0.00119395	0
438	299.019	Pseudopurpurin	C10394	yes	-	1	C10394	C15H8O7	-0.684808	0.0699005	4.8078e-05	1.08524	0.197329	0.000724447	0.526138	0.193831	0.000746646	0.236456	0.225305	0.0822743	1
439	299.055	Chrysoeriol	C04293	yes	Flavonoids	15	C04293; C05902; C08651; C10038; C10058; C10098; C10203; C10520; C10534; C12135; C16227; C16228; C16230; C17059; C17811	C16H12O6	0.199969	0.0916732	0.00237582	0.381403	0.127154	0.00201321	0.325845	0.0955744	0.000209952	0.263833	0.108393	0.00219551	0
440	299.076	1D-1-Guanidino-3-amino-1,3-dideoxy-scyllo-inositol 4-phosphate	C03993	yes	-	3	C03993; C04812; C11351	C13H16O8; C7H17N4O7P	0.433724	0.116314	0.000115283	-0.114179	0.11588	0.0770922	0.754898	0.0739991	0.000106003	-0.0569309	0.0852267	0.227398	0
441	299.259	(R)-2-Hydroxystearate	C03042	no	-	3	C03042; C03045; C03195	C18H36O3	-0.292066	0.103685	0.00155958	0.578193	0.136362	0.00262365	-0.268086	0.0910732	0.000639891	-0.266451	0.0630185	8.85118e-05	0
442	300.049	N-Acetyl-D-glucosamine 6-phosphate	C00357	yes	Organooxygen compounds	7	C00357; C04256; C04257; C04501; C06376; C18055; C18060	C8H16NO9P	0.0397922	0.0903563	0.416194	0.341424	0.0872692	0.000138023	0.131568	0.122486	0.0648618	0.232818	0.0741169	0.000302936	0
443	300.156	(Ac)2-L-Lys-D-Ala	C02487	no	-	1	C02487	C13H23N3O5	1.406	0.0787239	2.12986e-08	1.74626	0.136972	0.000138023	1.69179	0.100114	6.00871e-05	1.50369	0.0719307	5.72274e-06	4
444	301.036	Quercetin	C00389	yes	Flavonoids	12	C00389; C02806; C03662; C08577; C10068; C10072; C10078; C10079; C10105; C10177; C10192; C15031	C15H10O7	1.99984	0.341992	5.63951e-06	5.19471	0.842573	0.000152032	5.1816	0.28779	0.000553716	3.8609	0.881645	2.06803e-06	4
445	301.166	Tributyrin	C13870	no	Glycerolipids	1	C13870	C15H26O6	-0.0155492	0.244987	0.904604	-0.0499055	0.223587	0.666556	-0.0771045	0.148901	0.319946	0.118622	0.149477	0.165384	0
446	302.1	11-Deoxytetrodotoxin	C20026	yes	-	1	C20026	C11H17N3O7	-0.100712	0.0623842	0.0101987	0.547924	0.359893	0.00578647	-0.212794	0.106076	0.00906981	-0.186717	0.0968718	0.00671633	0
447	302.136	Nicotianamine	C05324	yes	-	1	C05324	C12H21N3O6	-0.159244	0.0410798	0.000172716	-0.670052	0.0813357	1.23864e-06	-0.397696	0.0467782	9.1668e-07	0.177386	0.0596587	0.00132994	0
448	303.051	Taxifolin	C01617	yes	-	3	C01617; C05911; C12316	C15H12O7	-0.315615	0.0948297	0.000259214	0.210209	0.22066	0.14332	0.0422488	0.119292	0.492398	-0.0681264	0.134321	0.355862	0
449	304.034	3',5'-Cyclic CMP	C00941	yes	-	2	C00941; C02354	C9H12N3O7P	-2.34608	0.0999278	4.83583e-06	-1.89659	0.188428	7.70599e-08	-0.378741	0.104293	0.000168765	-1.22527	0.0897286	8.94902e-05	3
450	304.089	Pirimiphos-methyl	C18403	yes	-	1	C18403	C11H20N3O3PS	-0.468654	0.103783	3.57527e-05	-0.97952	0.157086	6.15868e-06	-0.570409	0.0931449	5.30733e-06	-0.568504	0.163786	0.00138237	0
451	305.018	2',3'-Cyclic UMP	C02355	yes	Pyrimidine nucleotides	1	C02355	C9H11N2O8P	-1.80032	0.0703387	7.49191e-06	-1.70501	0.166715	1.51564e-07	-0.247406	0.0979851	0.00378318	-0.679898	0.103703	0.000129516	2
452	305.175	Compactin diol lactone	C14183	yes	-	3	C14183; C14300; C20203	C18H26O4	-0.141723	0.143983	0.078248	-0.536053	0.110527	1.89567e-05	-0.36531	0.0876399	0.000518666	-0.313383	0.0919265	0.000240513	0
453	305.212	Oxandrolone	C07346	no	Steroids and steroid derivatives	6	C07346; C14553; C14606; C15097; C15136; C15536	C19H30O3	-0.278522	0.175825	0.0287589	-0.249096	0.165126	0.0211135	-0.154517	0.187861	0.125321	-0.166823	0.104029	0.0219438	0
454	306.076	Glutathione	C00051	yes	Carboxylic acids and derivatives	2	C00051; C12392	C10H17N3O6S; C18H13NO4	-0.108876	0.122309	0.111726	0.0648852	0.101618	0.223693	0.143815	0.174962	0.115427	0.0895344	0.185506	0.381574	0
455	306.113	Cusparine	C10655	yes	-	3	C10655; C10738; C15195	C19H17NO3	-0.198022	0.0798653	0.00147951	-0.337025	0.0951699	0.000935666	-0.29335	0.0792161	0.00113836	0.00229533	0.107523	0.968283	0
456	307.151	Fructoselysine	C16488	yes	-	1	C16488	C12H24N2O7	0.397148	0.101818	0.000511315	0.406113	0.193542	0.00862682	0.364782	0.106242	0.00174248	-1.16881	0.086966	2.20077e-06	1
457	307.167	Ubenimex	C00732	yes	-	1	C00732	C16H24N2O4	0.250679	0.100793	0.002753	0.067631	0.108315	0.244433	0.147034	0.0847396	0.00987624	-0.553416	0.121235	2.84821e-05	0
458	307.191	5-O-Methylembelin	C10373	yes	Carbonyl compounds	2	C10373; C15818	C18H28O4	-0.229601	0.15221	0.014269	-0.32345	0.147449	0.00186614	-0.15529	0.140126	0.053798	-0.269376	0.120802	0.00212479	0
459	308.099	N-Acetylneuraminate	C00270	yes	-	4	C00270; C03525; C19909; C19910	C11H19NO9	-2.20535	0.0712878	9.13965e-06	-1.39729	0.224302	3.86285e-06	-1.60873	0.215666	5.31891e-07	-1.85583	0.107935	1.41372e-05	4
460	308.161	Isopropalin	C19063	yes	-	1	C19063	C15H23N3O4	-0.258271	0.0778777	0.000282305	-1.07866	0.0609924	2.30186e-07	-0.287911	0.0791128	0.000467675	-0.254826	0.0796024	0.00046912	1
461	309.041	6-Demethylsterigmatocystin	C03683	no	Sterigmatocystins	1	C03683	C17H10O6	-0.000122186	0.0481792	0.995611	-0.0144444	0.0702712	0.68711	-0.0411506	0.0479274	0.129738	0.0183089	0.067034	0.614232	0
462	309.172	Botrydial	C09622	no	-	1	C09622	C17H26O5	-0.565509	0.63682	0.302652	-0.37329	0.101266	0.000214623	-0.228647	0.128582	0.0171895	-0.0486213	0.0852533	0.294345	0
463	309.207	13(S)-HPOT	C04785	no	-	7	C04785; C07357; C15753; C16321; C16341; C19936; C20704	C18H30O4	-0.313531	0.122909	0.00103405	-0.579019	0.0944435	6.2611e-06	-0.34871	0.140092	0.00113046	-0.233532	0.17827	0.0296346	0
464	309.28	Prostanoic acid	C02064	no	-	2	C02064; C16526	C20H38O2	-0.33572	0.261741	0.0339884	-0.618271	0.327549	0.00429088	-0.218846	0.255865	0.152194	0.0360295	0.476424	0.890876	0
465	311.099	Vicianose	C01625	yes	-	4	C01625; C07285; C08245; C11535	C11H20O10	0.212981	0.082312	0.0011378	0.0171239	0.0630268	0.590033	0.0977133	0.0845576	0.0560991	0.170845	0.101528	0.0094444	0
466	311.223	(9Z,11E)-(13S)-13-Hydroperoxyoctadeca-9,11-dienoic acid	C04717	no	Fatty Acyls	12	C04717; C07338; C07354; C14827; C14831; C14832; C14834; C14836; C19618; C19937; C20186; C20703	C18H32O4	-0.367064	0.166369	0.00492481	-0.84576	0.115612	1.89049e-06	-0.382412	0.160948	0.0033025	-0.582109	0.125251	5.56842e-05	0
467	313.051	Malaoxon	C07498	yes	-	1	C07498	C10H19O7PS	1.47656	0.129623	0.000197821	1.60415	0.119944	5.12808e-05	1.76905	0.226643	0.00102574	1.63035	0.148503	4.07344e-05	4
468	313.072	Ventinone A	C10407	yes	-	9	C10407; C10471; C10516; C15100; C16418; C16753; C17784; C17785; C19584	C17H14O6	0.526597	0.143059	0.000215314	0.935701	0.138282	3.14872e-05	0.968321	0.252845	0.00250604	0.726934	0.113829	5.31726e-06	0
469	313.238	(9Z)-(7S,8S)-Dihydroxyoctadecenoic acid	C07355	no	-	5	C07355; C14828; C14829; C19620; C20702	C18H34O4	-0.347059	0.170866	0.00299497	-0.703923	0.160684	5.91874e-05	-0.368526	0.218594	0.0136035	-0.128961	0.132406	0.0908264	0
470	314.136	Clavamycin D	C17364	yes	-	1	C17364	C13H21N3O6	-0.546674	0.058271	7.06361e-06	-0.730206	0.046508	8.00073e-08	-0.521997	0.0871197	0.000160412	-0.381165	0.0776386	7.08424e-05	0
471	315.051	3-O-Methylquercetin	C04443	yes	-	10	C04443; C08999; C10022; C10084; C10119; C10120; C10176; C10185; C10188; C19739	C16H12O7	1.21216	0.270011	6.95513e-05	4.35692	0.466631	0.000369738	3.63117	0.29072	0.00114723	2.96827	0.36529	1.41372e-05	4
472	315.254	(9R,10R)-Dihydroxyoctadecanoic acid	C08314	no	-	3	C08314; C15988; C19622	C18H36O4	-0.562896	0.163284	0.000848123	-0.0894702	0.2266	0.46612	-0.649817	0.271983	0.00217742	-0.532684	0.166279	0.000209964	0
473	317.03	Gossypetin	C04109	yes	-	3	C04109; C10107; C10122	C15H10O8	0.58569	0.458484	0.0541249	4.36902	0.413083	0.00122165	3.95217	0.206898	0.000197379	3.11614	0.273786	7.5021e-06	3
474	318.093	Tetrodotoxin	C11692	yes	-	1	C11692	C11H17N3O8	-0.106426	0.106334	0.0682195	-0.113999	0.0830385	0.0225906	-0.126158	0.0874111	0.01796	0.00691298	0.0696469	0.859947	0
475	319.046	Dihydromyricetin	C02906	no	-	3	C02906; C03052; C18348	C15H12O8	0.0740486	0.077723	0.0894968	0.246008	0.0721907	0.000369738	0.166465	0.0792155	0.00274599	0.191328	0.13517	0.0206532	0
476	319.107	Timepidium bromide	C12768	yes	-	1	C12768	C17H22NOS2.	-0.0035065	0.0681531	0.923049	-0.159725	0.0955672	0.0122624	-0.0652067	0.0693463	0.0895123	0.121003	0.118901	0.0725031	0
477	320.145	6'-Dehydro-6'-oxoparomamine	C17583	yes	-	1	C17583	C12H23N3O7	-0.150843	0.111128	0.0293956	-0.63282	0.0928076	0.000117599	-0.642086	0.12407	1.08207e-05	-0.0741642	0.12337	0.293281	0
478	321.024	Digallate	C01572	no	-	1	C01572	C14H10O9	0.0506314	0.117039	0.40453	0.0244391	0.0819002	0.555816	-0.00521498	0.111821	0.931747	-0.00288052	0.108833	0.961444	0
479	321.13	2'-Deamino-2'-hydroxy-6'-dehydroparomamine	C20351	yes	-	1	C20351	C12H22N2O8	-0.116116	0.128121	0.103172	-0.135576	0.0779102	0.00685788	-0.268574	0.0687477	8.54343e-05	-0.334571	0.0613877	0.000103376	0
480	321.172	alpha-Zearalanol	C14752	no	Macrolides and a-logues	2	C14752; C14753	C18H26O5	-0.337026	0.141761	0.00781269	-0.68448	0.148281	4.47382e-05	-0.544041	0.140336	7.46607e-05	-0.432146	0.130751	0.00518517	0
481	321.208	Rapanone	C10399	no	-	4	C10399; C15494; C17495; C20853	C19H30O4	-0.274329	0.128797	0.00647927	-0.355304	0.123258	0.00234574	-0.145575	0.0912588	0.0116412	0.0573569	0.0825772	0.204203	0
482	322.045	CMP	C00055	yes	Pyrimidine nucleotides	3	C00055; C03104; C05822	C9H14N3O8P	-1.28459	0.0561958	1.33741e-06	-0.926368	0.276586	0.000623354	-0.442467	0.0736174	5.31603e-05	-0.798733	0.138729	6.9741e-06	1
483	323.028	UMP	C00105	yes	Pyrimidine nucleotides	4	C00105; C01168; C01368; C03031	C9H13N2O9P	-0.707579	0.0454696	8.82142e-07	0.0320006	0.213988	0.789276	-0.180257	0.0390499	2.96971e-05	-0.291987	0.08722	0.000881046	0
484	323.098	Bis-D-fructose 2',1:2,1'-dianhydride	C04333	yes	-	2	C04333; C04420	C12H20O10	0.202301	0.0615862	0.000249077	0.238958	0.0821281	0.0040494	0.170453	0.0787863	0.00639314	0.305157	0.0880061	0.000177183	0
485	323.146	Istamycin FU-10	C17981	yes	-	2	C17981; C20353	C12H24N2O8	0.262694	0.0754642	0.000760546	0.0841053	0.0967488	0.137941	-0.0769546	0.102457	0.156403	0.188099	0.110238	0.0111743	0
486	323.17	Piperonyl sulfoxide	C19147	no	-	1	C19147	C18H28O3S	0.0129909	0.0531141	0.63274	-0.17219	0.10815	0.014063	-0.0872425	0.0777106	0.0660233	0.0461202	0.0996837	0.383164	0
487	324.073	Pancratistatin	C08535	yes	-	1	C08535	C14H15NO8	-0.301517	0.132009	0.00363838	-0.481199	0.115788	0.00147105	-0.366546	0.0889819	5.23855e-05	-0.251139	0.145744	0.00865453	0
488	325.093	4-O-beta-D-Glucosyl-4-hydroxycinnamate	C04415	yes	-	6	C04415; C05158; C05839; C06739; C07605; C16827	C15H18O8	-0.112356	0.119363	0.0863818	-0.0679245	0.0951538	0.175766	-0.193838	0.131544	0.0155581	-0.0307636	0.130855	0.655695	0
489	325.202	2,3-Dinor-8-iso prostaglandin F2alpha	C14794	yes	-	1	C14794	C18H30O5	-0.214781	0.100087	0.00246464	-0.296681	0.092714	0.00422278	-0.244904	0.128081	0.00953323	-0.139223	0.0851507	0.0111743	0
490	326.18	Sethoxydim	C18539	no	-	1	C18539	C17H29NO3S	-0.254851	0.0543831	5.92845e-05	-0.217605	0.052314	6.79673e-05	-0.22499	0.0428634	7.77219e-05	-0.206877	0.0524918	8.19469e-05	0
491	327.108	Anisatin	C09294	yes	-	2	C09294; C10717	C15H20O8	0.448541	0.0858863	0.000102072	0.46747	0.0947367	0.00030224	0.338746	0.0922195	0.000119399	0.641307	0.150234	3.76548e-05	0
492	327.217	2,3-Dinor-8-iso prostaglandin F1alpha	C14795	yes	-	1	C14795	C18H32O5	-0.0415187	0.0990781	0.419886	-0.452518	0.100059	0.000365241	-0.114133	0.1319	0.116584	-0.00550764	0.0951772	0.915503	0
493	328.045	Mecarbam	C00575	yes	Purine nucleotides	4	C00575; C02353; C02507; C18661	C10H12N5O6P; C10H20NO5PS2	-3.28336	0.0689764	7.20164e-06	-3.18294	0.188929	6.96469e-09	-0.272535	0.066822	0.000539503	-1.49616	0.0846929	6.20147e-06	3
494	328.151	Valclavam	C06668	yes	-	1	C06668	C14H23N3O6	-0.583785	0.0842103	5.03605e-05	-0.814914	0.081622	4.20419e-07	-0.622751	0.0744042	3.34814e-06	-0.456383	0.0762853	1.91081e-05	0
495	328.17	Trifenmorph	C19144	yes	-	1	C19144	C23H23NO	-0.311685	0.110724	0.000816553	-0.802469	0.0674598	4.48322e-07	-0.49741	0.0651219	4.30122e-06	-0.165955	0.094155	0.012007	0
496	329.062	Penicillin O	C17405	yes	-	1	C17405	C13H18N2O4S2	0.14842	0.12023	0.0350693	0.15162	0.0829424	0.00707123	0.404429	0.0894293	0.00113836	0.3617	0.153529	0.002098	0
497	329.088	1-O-Vanilloyl-beta-D-glucose	C20470	yes	-	1	C20470	C14H18O9	-0.0292885	0.095086	0.542772	0.29705	0.0942252	0.00042535	0.137831	0.108514	0.0339607	0.363734	0.10157	0.000940627	0
498	329.233	9,12,13-TriHOME	C14833	yes	Fatty Acyls	3	C14833; C14835; C14837	C18H34O5	-0.0345587	0.136131	0.617294	-0.268644	0.0990292	0.000829459	-0.178019	0.123189	0.0261057	0.0293756	0.105023	0.593984	0
499	331.046	Purine mononucleotide	C04527	yes	-	5	C04527; C05325; C06196; C10118; C12633	C10H13N4O7P; C16H12O8	-0.0574744	0.12467	0.395529	1.96761	0.18511	0.00031335	1.63274	0.191436	0.000583393	1.19452	0.119131	6.93646e-06	3
500	331.068	1-O-Galloyl-beta-D-glucose	C01158	yes	-	1	C01158	C13H16O10	0.676093	0.0465424	3.1892e-05	0.755981	0.130632	2.18109e-05	0.812157	0.144351	1.08207e-05	0.804604	0.131148	1.4224e-05	0
501	331.126	Zanamivir	C08095	yes	Carboxylic acids and derivatives	1	C08095	C12H20N4O7	-0.137112	0.0538123	0.00192924	-0.20915	0.0509575	5.31471e-05	-0.837046	0.0523289	3.20532e-08	-0.0473734	0.0800669	0.273714	0
502	331.248	9,10,18-Trihydroxystearate	C19621	no	Fatty Acyls	1	C19621	C18H36O5	0.182644	0.23342	0.158161	1.58663	0.186138	0.000420662	-0.0593894	0.174537	0.498137	0.126921	0.114777	0.0516021	1
503	332.162	Primidolol	C11774	yes	-	1	C11774	C17H23N3O4	-0.0912361	0.0690461	0.0260907	-0.682467	0.113615	3.80963e-06	-0.732061	0.0836562	6.28109e-07	0.00678077	0.0756129	0.876232	0
504	333.059	sn-Glycero-3-phospho-1-inositol	C01225	yes	Glycerophospholipids	4	C01225; C04641; C04703; C10517	C9H19O11P	-0.0797199	0.0868504	0.0947243	-0.0158599	0.118166	0.79531	-0.0708528	0.137369	0.332597	0.0349795	0.118512	0.579727	0
505	334.125	N4-(Acetyl-beta-D-glucosaminyl)asparagine	C04540	yes	Organooxygen compounds	1	C04540	C12H21N3O8	-0.504691	0.127905	0.000177683	-0.351762	0.0999023	0.000326161	-0.601971	0.145849	3.19914e-05	-0.355356	0.121543	0.000771277	0
506	335.093	Psoralidin	C10523	yes	Isoflavonoids	2	C10523; C10529	C20H16O5	0.223359	0.0974702	0.00169344	0.197981	0.0645835	0.000523927	-0.730528	0.0685485	3.35551e-07	0.220894	0.0742114	0.000730482	0
507	335.11	3-Epihydroxymugineic acid	C15501	yes	-	1	C15501	C12H20N2O9	0.307949	0.111823	0.000733685	0.296269	0.107847	0.00106355	0.289998	0.10893	0.00163932	0.213624	0.127569	0.0164086	0
508	336.131	Streptobiosamine	C07655	yes	-	1	C07655	C13H23NO9	-0.273989	0.0681177	7.92037e-05	-0.177058	0.0715913	0.00147105	-0.323164	0.0905639	0.00011883	-0.137914	0.107331	0.0309677	0
509	336.167	Kyotorphin	C02993	yes	Carboxylic acids and derivatives	1	C02993	C15H23N5O4	-0.345774	0.0928584	0.000117033	-1.30139	0.140766	4.63801e-07	-0.640779	0.0880665	4.30122e-06	-0.355236	0.0717122	2.28134e-05	1
510	337.077	L-Ascorbic acid-2-glucoside	C18339	yes	-	1	C18339	C12H18O11	0.25685	0.0718711	0.000245955	0.267417	0.0547333	2.35944e-05	0.248436	0.0671003	0.000806007	0.267943	0.0839626	0.000293644	0
511	337.093	1-Caffeoyl-4-deoxyquinic acid	C10432	yes	-	3	C10432; C10441; C12208	C16H18O8	0.0646012	0.0573012	0.0519878	0.131839	0.104959	0.041214	0.0433916	0.116548	0.474188	0.0914776	0.116971	0.15286	0
512	338.173	Xamoterol	C11775	yes	-	1	C11775	C16H25N3O5	-0.218086	0.115463	0.0118532	-0.449702	0.0756261	5.85481e-05	-0.272957	0.0947138	0.000424336	-0.0936311	0.0954318	0.0822743	0
513	338.989	D-Fructose 1,6-bisphosphate	C00354	yes	Organooxygen compounds	10	C00354; C00665; C01220; C01231; C03693; C03785; C04062; C04063; C04064; C05378	C6H14O12P2	0.496101	0.114826	5.57802e-05	0.799546	0.152145	2.35944e-05	0.503238	0.0988664	8.14263e-05	0.585667	0.0921607	1.56595e-05	0
514	339.05	Versicolorin B	C20575	yes	-	1	C20575	C18H12O7	-0.0349457	0.100128	0.512097	-0.0121273	0.14191	0.867308	-0.0453516	0.117207	0.44197	-0.0789974	0.131431	0.262912	0
515	339.093	Cellobiono-1,5-lactone	C01093	yes	-	3	C01093; C05403; C05731	C12H20O11	-0.0212021	0.0660708	0.532443	0.0093823	0.0692784	0.788073	-0.066513	0.0716736	0.0927441	0.0274125	0.0658274	0.441099	0
516	339.141	Fortimicin FU-10	C17971	yes	-	1	C17971	C12H24N2O9	-0.18808	0.114309	0.0191834	-0.437835	0.0874533	0.000252259	-0.484227	0.0961729	1.32549e-05	-0.14879	0.058705	0.00108173	0
517	339.327	Docosanoic acid	C08281	no	Fatty Acyls	1	C08281	C22H44O2	-0.0872007	0.163692	0.312256	-0.542373	0.276254	0.0265589	-0.462308	0.438916	0.152614	-0.146081	0.454032	0.571491	0
518	340.047	Aristolochic acid	C08469	yes	-	1	C08469	C17H11NO7	-0.258739	0.0604659	6.39571e-05	-0.298106	0.0930954	0.00121779	-0.259355	0.114361	0.0018498	-0.293698	0.12129	0.00158992	0
519	340.125	6-(alpha-D-Glucosaminyl)-1D-myo-inositol	C15658	yes	Organooxygen compounds	2	C15658; C19702	C12H23NO10	0.105543	0.0843766	0.052626	-0.0213223	0.0559842	0.457129	0.0477512	0.087019	0.308061	0.224706	0.142533	0.0137316	0
520	341.038	Thiophanate-methyl	C14432	yes	-	1	C14432	C12H14N4O4S2	-1.14976	0.123622	0.00021879	-0.900175	0.323473	0.00108088	-1.0455	0.112369	1.22563e-06	-1.10086	0.0662833	1.11295e-05	3
521	341.109	Sucrose	C00089	yes	Heteroaromatic compounds	35	C00089; C00185; C00208; C00243; C00252; C00897; C01083; C01235; C01518; C01711; C01725; C01728; C01742; C01970; C01971; C02048; C02964; C03857; C04147; C04219; C05400; C05402; C06421; C06422; C07064; C08240; C08250; C15548; C18068; C19632; C19633; C19634; C19636; C19773; C20236	C12H22O11	-0.345089	0.0472645	7.62581e-05	-0.639102	0.290323	0.00482634	-2.79718	0.147595	1.13209e-09	-0.54574	0.072622	5.35903e-06	1
522	342.083	DIBOA-glucoside	C15772	yes	-	1	C15772	C14H17NO9	0.141171	0.106787	0.0279907	0.0559899	0.0835058	0.204528	0.176326	0.0930817	0.00680516	0.246851	0.112591	0.00501338	0
523	342.185	N,N-Didesmethyltamoxifen	C16548	yes	Stilbenes	1	C16548	C24H25NO	0.135432	0.122702	0.0664655	-0.183592	0.0967441	0.00492575	-0.668242	0.110931	1.28364e-05	0.170031	0.0701182	0.00138094	0
524	343.066	Bluensidine 6-phosphate	C17572	yes	-	1	C17572	C8H17N4O9P	-0.704728	0.114672	0.00015921	-0.726358	0.126529	2.71111e-05	-0.669542	0.105767	1.08207e-05	-0.51392	0.127845	8.91406e-05	0
525	344.04	3',5'-Cyclic GMP	C00942	yes	Purine nucleotides	4	C00942; C06194; C07025; C18344	C10H12N5O7P; C10H12N5O7P.	-2.16662	0.0663224	6.84047e-06	-1.94023	0.229283	4.16798e-07	0.209087	0.0626778	0.000450904	-0.484357	0.0996778	2.28134e-05	2
526	345.061	Tomentin	C04581	yes	-	7	C04581; C09967; C10021; C11620; C17788; C19588; C19589	C17H14O8	0.307381	0.104134	0.000428018	1.55614	0.235379	0.000960819	1.28349	0.161203	0.000427118	0.866591	0.164676	0.000146416	2
527	345.119	Aucubin	C09771	yes	Prenol lipids	2	C09771; C11671	C15H22O9	1.58877	0.239858	0.000143935	2.46154	0.222728	0.000206143	1.37879	0.268308	0.00256048	1.59234	0.210738	3.83796e-05	4
528	346.028	Glucolepidiin	C08413	yes	-	1	C08413	C9H17NO9S2	0.562973	0.115948	8.85735e-05	0.51216	0.0835559	0.000306747	0.629042	0.187794	0.000589117	0.588926	0.113394	3.0803e-05	0
529	346.056	AMP	C00020	yes	Purine nucleotides	6	C00020; C00362; C00946; C01367; C04378; C19970	C10H14N5O7P	-1.79594	0.0894487	3.21555e-06	-2.23264	0.0711889	9.2633e-07	-1.64511	0.0913985	3.76574e-09	-1.64055	0.0922346	1.91081e-05	4
530	349.086	Penicillin V	C08126	yes	Carboxylic acids and derivatives	2	C08126; C17404	C16H18N2O5S	0.258502	0.182823	0.0260907	0.202497	0.225895	0.10477	0.171562	0.208763	0.12457	0.302787	0.167086	0.00629971	0
531	349.238	Tetrahydrocorticosterone	C05476	no	Steroids and steroid derivatives	6	C05476; C05483; C14594; C15368; C15403; C17496	C21H34O4	-0.257948	0.114271	0.00193234	-0.268901	0.151974	0.00730359	-0.275637	0.193483	0.0220915	-0.330137	0.122911	0.00247502	0
532	350.066	Pretetramid	C18295	yes	-	1	C18295	C19H13NO6	-0.00591922	0.132632	0.92782	0.1074	0.103118	0.0781553	0.0551324	0.0947034	0.263054	0.167053	0.118318	0.0296346	0
533	350.103	S-(2-Hydroxyethyl)glutathione	C14875	yes	Carboxylic acids and derivatives	1	C14875	C12H21N3O7S	-0.0609513	0.0747057	0.148978	-0.0128975	0.0933459	0.782613	-0.0526924	0.0900831	0.26841	0.0889034	0.0995538	0.131707	0
534	351.069	7-Hydroxymethyl-12-methylbenz[a]anthracene sulfate	C19562	yes	-	1	C19562	C20H16O4S	-0.0276405	0.0835371	0.512036	0.00385791	0.125558	0.952222	-0.0347404	0.210982	0.754053	-0.0086973	0.172655	0.924264	0
535	352.117	Piperophos	C18758	yes	-	1	C18758	C14H28NO3PS2	0.595462	0.0857029	7.33223e-06	0.582291	0.0993956	0.000306747	0.356222	0.13651	0.00189593	0.593027	0.1267	0.000383516	0
536	352.162	Dihydrozeatin riboside	C16447	yes	-	1	C16447	C15H23N5O5	-0.0561256	0.0842451	0.218303	-0.385408	0.0534878	8.01755e-05	-0.322045	0.0418019	1.05047e-05	0.0710352	0.132479	0.321089	0
537	353.052	2-Caffeoylisocitrate	C02927	yes	-	1	C02927	C15H14O10	0.239658	0.121296	0.00494939	0.390372	0.0885689	0.000888893	0.344996	0.122492	0.000941631	0.376288	0.0969976	8.85118e-05	0
538	353.123	Fusarenone X	C19583	yes	-	1	C19583	C17H22O8	0.274822	0.0563927	8.96411e-05	0.098794	0.073234	0.0301948	-0.231569	0.071519	0.000824376	0.0712138	0.139724	0.377902	0
539	354.147	S-Adenosylmethioninamine	C01137	yes	5'-deoxyribonucleosides	1	C01137	C14H23N6O3S	0.00302829	0.0926408	0.950279	-0.197135	0.0980546	0.00314012	-0.165365	0.129456	0.0373628	0.0236034	0.112243	0.696676	0
540	356.255	Leucyl-leucyl-norleucine	C11328	yes	-	1	C11328	C18H35N3O4	-0.155561	0.119399	0.0277509	-2.53716	0.249252	2.05133e-05	-2.16186	0.214332	9.49763e-06	-0.373676	0.144538	0.000894126	2
541	358.108	Isopenicillin N	C05557	yes	-	3	C05557; C06564; C10584	C14H21N3O6S; C22H17NO4	-0.0971431	0.0558291	0.00850211	-0.0156325	0.0952934	0.752113	-0.115163	0.0993983	0.0445035	-0.00510396	0.0795934	0.907728	0
542	358.123	Rabeprazole	C07864	yes	Benzimidazoles	1	C07864	C18H21N3O3S	-0.207357	0.103309	0.00829976	-0.21505	0.135246	0.0190303	-0.166717	0.0963383	0.00742349	-0.0630249	0.094712	0.215556	0
543	359.075	Nitrovin	C19487	yes	-	1	C19487	C14H12N6O6	0.156774	0.0477315	0.000998784	0.0981662	0.14891	0.206077	0.185417	0.0831045	0.0025989	0.184148	0.0670913	0.00166052	0
544	361.115	Antirrhinoside	C09768	yes	-	2	C09768; C09773	C15H22O10	-0.147867	0.0761149	0.00725832	-0.306552	0.250841	0.0487463	-2.3233	0.0676302	1.22461e-08	-0.342358	0.110567	0.000511841	1
545	361.136	Clavamycin B	C17362	yes	-	2	C17362; C17363	C13H22N4O8	-0.448096	0.11037	6.95513e-05	-0.488102	0.0810808	6.77144e-06	-1.44734	0.0989227	3.49566e-08	-0.348634	0.0819374	0.000846825	1
546	362.05	GMP	C00144	yes	Purine nucleotides	4	C00144; C06193; C18239; C19968	C10H14N5O8P	-0.730515	0.14869	3.91192e-05	-1.09852	0.152303	5.13503e-06	-0.578761	0.0960249	8.60113e-05	-0.627377	0.174074	0.00138094	1
547	362.139	delta-(L-2-Aminoadipyl)-L-cysteinyl-D-valine	C05556	yes	-	1	C05556	C14H25N3O6S	-0.295121	0.0709474	7.36242e-05	-0.44664	0.0674413	2.97039e-06	-0.644842	0.0929405	2.10083e-06	-0.177999	0.0871009	0.00681638	0
548	363.017	6-Thioinosine-5'-monophosphate	C04646	yes	Purine nucleotides	1	C04646	C10H13N4O7PS	-0.0740983	0.129413	0.293729	0.0358172	0.0614582	0.271566	-0.00545682	0.118205	0.931796	0.0192396	0.158481	0.827233	0
549	363.035	Xanthosine 5'-phosphate	C00655	yes	Purine nucleotides	1	C00655	C10H13N4O9P	-0.0698119	0.060109	0.0496938	0.0799879	0.0630974	0.0314843	0.021622	0.111657	0.708571	0.0278131	0.108817	0.645198	0
550	363.141	N-Acetylmuramoyl-Ala	C02999	yes	Organooxygen compounds	1	C02999	C14H24N2O9	0.109468	0.0849166	0.0291134	-0.135823	0.060468	0.0020306	0.0155658	0.0622449	0.634162	0.205362	0.0888481	0.00436766	0
551	367.017	Orotidine 5'-phosphate	C01103	no	Pyrimidine nucleosides	1	C01103	C10H13N2O11P	0.111988	0.116522	0.102398	0.134868	0.11244	0.0398447	0.240325	0.0768937	0.00122644	0.200064	0.169524	0.0437514	0
552	367.083	Velloquercetin	C10194	yes	-	4	C10194; C12401; C18629; C20574	C20H16O7	-0.166948	0.10154	0.0237645	-0.130165	0.0873824	0.0169509	-0.16532	0.0889699	0.00727405	-0.139446	0.0889345	0.016247	0
553	367.214	Propantheline	C07506	yes	Benzopyrans	2	C07506; C11762	C23H30NO3; C23H30NO3.	-0.514299	0.122149	5.33339e-05	-0.616798	0.409755	0.0245568	-0.740601	0.0609598	4.30122e-06	-0.435749	0.135613	0.000378217	0
554	369.067	Digalacturonate	C02273	yes	Organooxygen compounds	2	C02273; C04354	C12H18O13	0.265429	0.111088	0.00494733	0.545392	0.124409	0.000260608	0.282898	0.108462	0.000941631	0.318695	0.120258	0.00474071	0
555	371.157	Clavamycin F	C17395	yes	-	1	C17395	C15H24N4O7	0.00888003	0.0933903	0.858518	-0.0533792	0.103218	0.312744	-0.297229	0.028071	3.09761e-07	0.0308542	0.0867519	0.525813	0
556	371.193	(Ac)2-L-Lys-D-Ala-D-Ala	C03326	yes	-	1	C03326	C16H28N4O6	0.033666	0.0933693	0.496987	-0.242872	0.0961103	0.001736	-1.20221	0.0857038	1.93483e-08	0.104924	0.0864256	0.0439489	1
557	376.12	6-(2-Hydroxyethyl)-5,6-dihydrosanguinarine	C12198	yes	-	1	C12198	C22H19NO5	0.200522	0.0749083	0.00233576	0.46087	0.122694	0.00028236	0.301216	0.0987569	0.00237542	0.410837	0.123497	0.00106651	0
558	378.089	Methicillin sodium	C13973	yes	-	1	C13973	C17H19N2O6S.	0.147609	0.0755763	0.0142533	-0.0844649	0.0848373	0.0879548	-0.660599	0.0868738	1.16608e-06	0.0605187	0.0862808	0.194104	0
559	379.083	Diphyllin	C10559	yes	-	2	C10559; C12373	C21H16O7	0.106168	0.0918334	0.0782856	-0.108856	0.0958683	0.0490347	-0.713175	0.0636736	1.42621e-07	0.0493238	0.070069	0.193801	0
560	384.121	Anthocyanin 3'-O-beta-D-glucoside	C15550	yes	-	1	C15550	C21H21O7	-0.254756	0.0861367	0.000482856	-0.417588	0.248621	0.0209778	-0.309075	0.114471	0.00177897	-0.217691	0.103063	0.00312338	0
561	385.165	Burseran	C10547	no	-	2	C10547; C10561	C22H26O6	-0.0987865	0.154098	0.233958	-0.303723	0.273788	0.0614667	-0.366628	0.271939	0.0542836	-0.301679	0.278854	0.0822633	0
562	387	dUDP	C01346	yes	Pyrimidine nucleotides	1	C01346	C9H14N2O11P2	0.15302	0.120091	0.0326293	0.470399	0.105097	3.35355e-05	0.369253	0.15173	0.001976	0.347111	0.131741	0.0010719	0
563	389.108	Monotropein	C09788	yes	Prenol lipids	1	C09788	C16H22O11	0.0019189	0.13675	0.9781	0.107027	0.113373	0.121332	0.299603	0.3168	0.131621	0.114267	0.0688407	0.0109373	0
564	389.219	Rehmaionoside A	C17450	no	-	2	C17450; C17451	C19H34O8	-0.206399	0.0903631	0.00192924	-0.413304	0.0516087	1.1564e-06	-0.432228	0.057802	1.65633e-05	-0.176199	0.0743019	0.00176729	0
565	391.14	Eupatoroxin	C09443	yes	-	3	C09443; C09447; C09577	C20H24O8	-0.190586	0.120628	0.0200538	-0.229255	0.0966666	0.00159175	-0.301595	0.0778112	7.83699e-05	-0.0330871	0.13019	0.63179	0
566	391.285	Chenodeoxycholate	C02528	no	Steroids and steroid derivatives	11	C02528; C04483; C07880; C15515; C15517; C17646; C17660; C17661; C17662; C17664; C17687	C24H40O4	-1.77688	0.245315	0.000131039	-2.104	0.26198	2.37442e-07	-1.08089	0.308516	5.65505e-05	-1.7577	0.161108	3.2533e-05	4
567	392.108	Amsacrine	C01553	yes	Depsides and depsidones	1	C01553	C21H19N3O3S	-0.310757	0.11422	0.00230438	-0.254906	0.105231	0.0027987	-0.496143	0.0987024	5.38681e-05	-0.358943	0.0729081	2.28134e-05	0
568	393.043	Epithienamycin F	C17399	yes	-	1	C17399	C13H18N2O8S2	0.0784523	0.129134	0.241831	0.055917	0.0992629	0.288309	0.160124	0.0989354	0.0107792	0.11334	0.114445	0.102053	0
569	395.077	Nogalonic acid methyl ester	C12415	yes	-	4	C12415; C12417; C12421; C18630	C21H16O8	0.0950241	0.0549981	0.00826496	0.107869	0.0946962	0.0483412	0.139392	0.0628222	0.00611334	0.155483	0.097879	0.013373	0
570	398.098	Nocardicin E	C01739	yes	-	2	C01739; C17354	C19H17N3O7	-0.0686671	0.092906	0.168128	0.0951476	0.184772	0.314084	0.115981	0.13498	0.124368	0.0621298	0.156537	0.448397	0
571	401.016	dTDP	C00363	yes	Pyrimidine nucleotides	1	C00363	C10H16N2O11P2	0.130474	0.0663737	0.00862404	0.423097	0.0996097	0.000214375	0.420973	0.0826587	0.000106564	0.149018	0.167987	0.116917	0
572	405.099	Rotenonone	C10525	yes	-	1	C10525	C23H18O7	0.00337689	0.067412	0.923049	-0.436764	0.281434	0.0205192	-0.0950981	0.105831	0.10674	0.0844511	0.105696	0.143227	0
573	405.141	Ipolamiide	C09784	yes	-	3	C09784; C11659; C17000	C17H26O11	0.156856	0.107252	0.0173989	0.0925473	0.0969878	0.0843167	-0.193785	0.084637	0.00315109	0.150867	0.123166	0.0390922	0
574	407.28	Cholic acid	C00695	no	Steroids and steroid derivatives	14	C00695; C01558; C04661; C17644; C17647; C17649; C17650; C17654; C17657; C17667; C17668; C17726; C17727; C17737	C24H40O5	-0.815177	0.171205	2.16324e-05	-0.956981	0.12669	2.97039e-06	-0.71964	0.107952	5.78308e-06	-0.759152	0.103966	2.58839e-06	0
575	411.109	Podophyllotoxone	C10875	yes	-	3	C10875; C12424; C20046	C22H20O8	-0.0274466	0.0874621	0.538628	-0.153723	0.0600643	0.000954353	-0.139721	0.138681	0.0664046	-0.0592522	0.133167	0.404544	0
576	413.108	Asperuloside	C09769	yes	-	1	C09769	C18H22O11	0.226719	0.119775	0.00600488	0.147963	0.103712	0.0229037	0.12383	0.0765609	0.0111344	0.188362	0.0926772	0.00502486	0
577	413.154	Diltiazem	C06958	yes	Benzothiazepines	1	C06958	C22H26N2O4S	0.00646376	0.120201	0.919978	-0.229396	0.112628	0.00585029	-0.138258	0.0838823	0.0124658	-0.0447021	0.13193	0.525813	0
578	418.955	1D-myo-Inositol 1,3,4-trisphosphate	C01243	yes	Organooxygen compounds	2	C01243; C01245	C6H15O15P3	0.0643099	0.0816686	0.161868	0.0403686	0.10173	0.439737	0.0348978	0.115117	0.545837	0.036917	0.0937305	0.471872	0
579	420.192	Fenpyroximate	C11098	yes	-	1	C11098	C24H27N3O4	-0.137259	0.0878648	0.0270019	-0.485509	0.11876	6.54134e-05	-0.774405	0.16938	2.29921e-05	-0.332983	0.103846	0.000342907	0
580	421.209	1-Octen-3-ol-3-o-beta-D-xylopyranosyl(1->6)-beta-D-glucopyranoside	C17614	yes	-	1	C17614	C19H34O10	-0.325588	0.0790437	0.000177214	-0.652867	0.106152	7.96896e-06	-0.930226	0.0780414	1.42621e-07	-0.432261	0.119213	0.000146416	0
581	422.208	Idanpramine	C17728	yes	-	1	C17728	C24H29N3O4	-0.282898	0.0898773	0.000501136	-0.555074	0.0768852	1.74579e-06	-0.709801	0.0837589	6.27359e-06	-0.416295	0.0692107	1.11295e-05	0
582	424.228	Nafoxidine	C14212	yes	-	1	C14212	C29H31NO2	-1.10111	0.105731	9.32112e-06	-1.01765	0.136967	0.000299846	-0.912903	0.206689	8.99604e-05	-0.795978	0.217162	7.24741e-05	2
583	425.183	Abscisic acid glucose ester	C15970	no	-	1	C15970	C21H30O9	-0.273107	0.0667748	0.000306931	-0.438169	0.0386362	2.71111e-05	-0.394583	0.0567205	2.49984e-06	-0.303388	0.0994176	0.000443289	0
584	431.098	Vitexin	C01460	yes	-	7	C01460; C01714; C04608; C09126; C10345; C10420; C16911	C21H20O10	0.0459931	0.132353	0.514676	-2.24342	0.154583	0.000144483	-2.50524	0.143673	1.51373e-05	-0.251497	0.108548	0.00209986	2
585	432.311	Glycolithocholate	C15557	no	Steroids and steroid derivatives	1	C15557	C26H43NO4	-0.504508	0.161022	0.00216916	-0.776706	0.111719	5.02017e-05	-1.15467	0.255216	0.000609638	-0.491799	0.156888	0.0012865	1
586	443.258	3-(O-Geranylgeranyl)-sn-glycerol 1-phosphate	C04590	yes	-	1	C04590	C23H41O6P	-0.276112	0.160776	0.0105645	-0.888566	0.191777	2.03971e-05	-0.833914	0.171781	2.21049e-05	-0.455615	0.105614	7.67776e-05	0
587	445.078	Baicalin	C10025	yes	Flavonoids	1	C10025	C21H18O11	-0.17062	0.091543	0.00625877	-0.528649	0.142181	7.29696e-05	-0.538963	0.132328	0.00021267	-0.128541	0.0936951	0.0259565	0
588	447.093	Quercitrin	C01750	yes	Flavonoids	10	C01750; C01821; C03951; C08598; C10042; C10114; C12249; C12626; C16409; C17056	C21H20O11	1.33549	0.11372	0.000152698	-1.90358	0.250076	3.30813e-06	-1.98036	0.101655	1.2173e-05	0.765431	0.127643	6.08193e-05	3
589	448.306	Glycodeoxycholate	C05464	no	-	2	C05464; C05466	C26H43NO5	-0.6481	0.199929	0.00020682	-0.912705	0.179574	2.05133e-05	-0.956345	0.173505	5.31466e-06	-0.572685	0.109413	2.1158e-05	0
590	450.312	Teleocidin B-1	C05150	no	-	1	C05150	C28H41N3O2	-0.546944	0.176246	0.00036325	-0.767385	0.134997	8.65285e-05	-0.798628	0.126743	9.06027e-06	-0.510292	0.105097	1.91081e-05	0
591	461.07	Cefamandole	C06879	yes	Lactams	1	C06879	C18H18N6O5S2	-0.284692	0.0628718	6.48735e-05	-0.416969	0.163896	0.00171478	-1.37385	0.127282	6.49901e-08	-0.370431	0.089524	7.08424e-05	1
592	461.203	Patrinoside	C11640	yes	-	2	C11640; C17068	C21H34O11	-0.40175	0.101724	0.00014043	-0.726075	0.0951272	1.12506e-06	-0.845675	0.0843379	3.09761e-07	-0.485233	0.065495	3.22134e-06	0
593	463.088	Quercetin 3-O-glucoside	C05623	yes	Flavonoids	7	C05623; C10050; C10073; C10108; C12639; C16410; C17763	C21H20O12	0.329657	0.101842	0.00279435	-1.98764	0.247266	0.000275274	-2.17182	0.183424	0.000197574	-0.120547	0.0965457	0.0434694	2
594	464.218	Codonocarpine	C10582	yes	-	1	C10582	C26H31N3O5	-0.394582	0.0874399	7.30114e-05	-0.617816	0.0632115	3.23973e-07	-0.859928	0.0817414	2.57545e-07	-0.555606	0.111972	3.00407e-05	0
595	464.301	Glycocholate	C01921	no	Steroids and steroid derivatives	1	C01921	C26H43NO6	-0.318198	0.120797	0.00112763	-0.454332	0.0931472	1.85968e-05	-0.381459	0.100627	0.000364265	-0.243867	0.0956018	0.00182073	0
596	465.093	N-Adenylylanthranilate	C03293	yes	-	1	C03293	C17H19N6O8P	0.0718864	0.074864	0.104997	-0.510861	0.113656	0.000316127	-0.7685	0.128815	1.4694e-05	-0.0857564	0.095188	0.118236	0
597	466.307	Oxethazaine	C12552	no	-	1	C12552	C28H41N3O3	-0.318081	0.0929452	0.000197954	-0.461827	0.0835753	1.62764e-05	-0.351461	0.110566	0.000541996	-0.237433	0.115934	0.00425864	0
598	466.967	dUTP	C00460	no	Pyrimidine nucleotides	1	C00460	C9H15N2O14P3	0.0288003	0.125787	0.641807	0.260089	0.0867232	0.00109461	0.20221	0.11879	0.00925239	0.110921	0.127855	0.119256	0
599	467.135	104-1	C12403	no	-	3	C12403; C12407; C18778	C25H24O9	0.0270556	0.103054	0.601507	-0.144488	0.135824	0.05301	-0.0515654	0.111228	0.361627	-0.156886	0.107497	0.0178778	0
600	468.063	2-(alpha-Hydroxyethyl)thiamine diphosphate	C05125	yes	Diazines	1	C05125	C14H23N4O8P2S	-0.370863	0.103653	0.000244999	-0.336067	0.0630169	2.59681e-05	-0.359039	0.121858	0.00046501	-0.274596	0.107678	0.00133733	0
601	469.135	Plumieride	C09797	yes	-	1	C09797	C21H26O12	-0.0271191	0.11049	0.635345	-0.0614497	0.0995381	0.246966	-0.114087	0.115914	0.0854832	-0.0385158	0.0871988	0.410364	0
602	479.083	Gossypin	C10051	yes	-	3	C10051; C17514; C17520	C21H20O13	1.7661	0.12773	1.03975e-05	0.32723	0.105651	0.000283109	0.182158	0.081117	0.00291933	2.67146	0.159509	3.7025e-05	2
603	482.296	Taurolithocholate	C02592	no	Steroids and steroid derivatives	1	C02592	C26H45NO5S	-0.470618	0.171853	0.000501399	-1.05151	0.171149	5.13503e-06	-1.13132	0.162129	1.10453e-05	-0.619221	0.162522	0.000841851	2
604	489.218	Glimepiride	C07669	yes	Benzene and substituted derivatives	1	C07669	C24H34N4O5S	0.194372	0.0717913	0.00492481	-0.085099	0.0558983	0.0177117	-0.388746	0.0932779	0.000631571	0.136147	0.0997433	0.0384059	0
605	498.289	Taurodeoxycholate	C05463	no	Steroids and steroid derivatives	3	C05463; C05465; C16868	C26H45NO6S	-0.508617	0.190494	0.000639064	-0.7817	0.153449	1.18696e-05	-0.595691	0.185897	0.00021267	-0.446364	0.105985	4.08812e-05	0
606	499.291	Mupirocin	C11758	no	Fatty Acyls	1	C11758	C26H44O9	-0.524021	0.192055	0.000597724	-0.827284	0.146049	6.76183e-06	-0.683775	0.173687	5.13407e-05	-0.510469	0.11358	2.68522e-05	0
607	503.077	Hypericin	C07606	yes	Pyrenes	1	C07606	C30H16O8	-0.336274	0.0731871	0.000463022	-0.309317	0.173685	0.00591517	-0.369743	0.0921526	8.54343e-05	-0.244766	0.102612	0.00449784	0
608	503.161	Raffinose	C00492	yes	Organooxygen compounds	13	C00492; C00713; C00883; C01835; C02160; C03367; C03661; C03848; C05404; C06219; C08239; C08243; C08251	C18H32O16	-0.137387	0.0619797	0.00903805	-0.34339	0.224276	0.0167979	-0.199497	0.124662	0.00955684	-0.142155	0.101331	0.0233298	0
609	513.23	Telmisartan	C07710	no	Benzene and substituted derivatives	1	C07710	C33H30N4O2	-0.274568	0.0955656	0.0010247	-0.503641	0.0844888	5.70729e-06	-0.71023	0.0831498	9.41436e-07	-0.42424	0.0786944	1.41372e-05	0
610	514.284	Taurocholate	C05122	no	Steroids and steroid derivatives	2	C05122; C15516	C26H45NO7S	-0.308334	0.118553	0.00104828	-0.461996	0.0929256	1.5737e-05	-0.345187	0.120803	0.00112552	-0.240191	0.0952308	0.00222217	0
611	515.287	L-Olivosyl-oleandolide	C11991	no	-	1	C11991	C26H44O10	-0.320803	0.110041	0.000526313	-0.491749	0.0884921	8.1309e-06	-0.397173	0.121279	0.000543667	-0.289758	0.0960866	0.000731354	0
612	519.297	Cyasterone	C08816	yes	-	2	C08816; C11300	C29H44O8	-0.0735536	0.153652	0.354268	-0.474888	0.0855938	1.90306e-05	-0.398639	0.113379	0.000203106	-0.356532	0.141704	0.00116591	0
613	522.26	Calcimycin	C11309	yes	-	1	C11309	C29H37N3O6	-0.224663	0.119849	0.00788851	-0.482567	0.0927164	1.37821e-05	-0.454887	0.109393	4.81997e-05	-0.239704	0.135112	0.00707214	0
614	529.244	Uscharidin	C08883	yes	-	1	C08883	C29H38O9	-0.312188	0.095349	0.000376916	-1.25581	0.135254	1.39013e-06	-1.66055	0.0554748	6.28109e-07	-0.948186	0.0657971	5.81473e-08	2
615	531.259	Calactin	C08854	yes	-	3	C08854; C08855; C09716	C29H40O9	-0.611534	0.112467	0.000117033	-0.773139	0.0685566	1.51564e-07	-0.826963	0.0546687	1.95745e-07	-0.589225	0.104808	3.06682e-05	0
616	533.093	Luteolin 7-O-(6''-malonylglucoside)	C10103	yes	-	1	C10103	C24H22O14	-0.146426	0.102192	0.0176933	-1.52071	0.317959	1.65826e-05	0.801916	0.146403	0.000653452	0.838329	0.13863	5.65606e-05	1
617	540.318	Novapikromyin	C20740	no	-	1	C20740	C28H47NO9	-1.09104	0.134372	1.90847e-06	-2.17823	0.077696	1.57479e-07	-2.35089	0.17722	2.51232e-05	-1.64087	0.131126	2.28134e-05	4
618	542.156	Patent blue	C13725	yes	-	1	C13725	C27H31N2O6S2.	-0.107275	0.0764218	0.0205903	-0.134892	0.0976865	0.0205192	-0.291846	0.0917469	0.000540253	0.0200693	0.163311	0.822349	0
619	547.217	Bruceantin	C08749	yes	-	1	C08749	C28H36O11	-0.122103	0.0878791	0.0243	-0.345858	0.0629691	0.000100688	-0.561709	0.0945239	8.75567e-06	-0.210279	0.124376	0.0113089	0
620	561.234	Eriocarpin	C08865	yes	-	1	C08865	C29H38O11	-0.500063	0.0895583	1.38676e-05	-0.633097	0.0577832	3.05838e-05	-0.668212	0.122518	6.71105e-06	-0.510678	0.102678	5.72478e-05	0
621	574.122	dTDP-D-mycaminose	C11933	yes	-	3	C11933; C19948; C20766	C18H31N3O14P2	-0.267874	0.0757994	0.000152698	-0.216107	0.0791912	0.00071742	-0.785569	0.0698193	6.69316e-05	0.0470489	0.108743	0.424551	0
622	582.064	Watasenia luciferin	C02894	no	-	1	C02894	C26H21N3O9S2	-0.0986976	0.0705845	0.0233408	-0.0981362	0.10525	0.0940937	-0.0754327	0.0960975	0.15033	-0.0932143	0.119889	0.164519	0
623	585.307	5-Oxoavermectin ''2b'' aglycone	C11954	no	-	1	C11954	C33H46O9	-0.777665	0.127668	5.63951e-06	-1.53713	0.222741	5.13503e-06	-1.95839	0.0858064	5.78871e-06	-1.31589	0.0740594	2.06803e-06	3
624	591.261	Pheophorbide a	C18021	yes	-	1	C18021	C35H36N4O5	-0.489576	0.0942393	6.201e-05	-1.17122	0.160383	1.23911e-06	-1.31516	0.0729179	2.14601e-08	-0.796752	0.0627968	3.99841e-06	2
625	593.151	Isoorientin 2''-O-rhamnoside	C03870	yes	-	8	C03870; C04024; C04199; C08064; C10195; C10513; C12630; C17600	C27H30O15	-0.0615975	0.106919	0.278499	-4.6077	0.201646	7.18381e-05	-4.59068	0.288273	6.28296e-06	-1.50526	0.125315	1.43553e-05	3
626	595.282	Berbamunine	C05177	yes	-	3	C05177; C06511; C06515	C36H40N2O6	-0.238527	0.124937	0.00501541	-0.494677	0.132614	0.00010448	-0.474996	0.100891	5.38681e-05	-0.295462	0.0963097	0.000364473	0
627	602.274	Irinotecan carboxylate	C11365	yes	-	1	C11365	C33H39N4O7	-0.514406	0.0617375	1.62189e-06	-0.823759	0.0960503	1.30478e-06	-1.02585	0.130561	7.18861e-07	-0.701514	0.117563	6.9741e-06	1
628	605.228	Cancentrine	C09370	yes	-	1	C09370	C36H34N2O7	-0.276555	0.0857014	0.00254135	-0.381806	0.0920113	0.00116389	-0.46294	0.060256	2.49512e-06	-0.286611	0.12282	0.00184613	0
629	606.073	UDP-N-acetyl-alpha-D-glucosamine	C00043	yes	Pyrimidine nucleotides	3	C00043; C00203; C01170	C17H27N3O17P2	0.354009	0.162821	0.00236142	1.14236	0.0633997	2.00808e-06	0.351979	0.147545	0.00167889	0.323631	0.13177	0.00138094	1
630	609.146	Rutin	C05625	yes	Flavonoids	6	C05625; C10102; C12634; C16490; C17563; C19796	C27H30O16	0.00875126	0.106908	0.880289	-2.22804	0.141707	0.000151517	-0.757716	0.154601	1.3705e-05	-0.553408	0.113575	7.24261e-05	1
631	617.263	APC	C16542	yes	Camptothecins	1	C16542	C33H38N4O8	-0.398756	0.0792221	8.16656e-05	-0.611737	0.0737058	7.9769e-06	-0.773332	0.111988	2.29694e-05	-0.404966	0.08987	3.49974e-05	0
632	620.296	Z-Arg-Arg-NHMec	C02334	yes	-	1	C02334	C30H39N9O6	0.502526	0.113846	0.000227049	0.365541	0.0802732	3.14872e-05	0.372498	0.112625	0.000225303	0.550051	0.0917758	8.15721e-05	0
633	625.14	Quercetin 3-O-beta-D-glucosyl-(1->2)-beta-D-glucoside	C12667	yes	-	1	C12667	C27H30O17	0.866078	0.113694	0.000312485	-3.28253	0.223581	0.000178423	0.150272	0.180661	0.115293	0.154091	0.125978	0.038054	1
634	633.125	Actinorhodin	C06691	yes	-	1	C06691	C32H26O14	-0.260532	0.131028	0.00360853	-0.428816	0.0861603	3.05838e-05	-0.484705	0.0643154	4.30122e-06	-0.233415	0.114121	0.00367317	0
635	644.307	Aconitine	C06091	no	-	1	C06091	C34H47NO11	-0.418522	0.114823	0.000137188	-0.90601	0.0971234	4.63801e-07	-1.05184	0.136234	1.07266e-06	-0.584824	0.0904773	5.27301e-06	1
636	651.307	Hernandezine	C09461	yes	-	2	C09461; C09656	C39H44N2O7	-0.135145	0.110908	0.0381037	-0.312206	0.0671358	6.76904e-05	-0.223573	0.103357	0.00225831	-0.0561347	0.107857	0.32887	0
637	672.338	Veratridine	C06544	no	-	2	C06544; C08664	C36H51NO11	-1.44458	0.0867504	1.11994e-05	-1.9252	0.180306	7.719e-08	-2.02347	0.0894366	1.31861e-06	-1.70438	0.0936051	5.89415e-06	4
638	682.287	27-O-Demethylrifamycin SV	C14727	yes	-	1	C14727	C36H45NO12	-0.375653	0.109265	0.000172716	-0.489677	0.0738625	1.89567e-05	-0.50324	0.117134	4.15708e-05	-0.403738	0.118279	0.00018935	0
639	696.301	Rifamycin	C12044	no	-	1	C12044	C37H47NO12	-0.405122	0.115263	0.000152698	-0.331387	0.0619519	0.000177022	-0.732355	0.108422	2.09846e-06	-0.420658	0.0756117	1.54833e-05	0
640	702.25	Tetrahydropteroyltri-L-glutamate	C04144	yes	Pteridines and derivatives	1	C04144	C29H37N9O12	-0.308511	0.11223	0.00171119	-0.537655	0.126533	7.29696e-05	-0.72953	0.0698231	5.07529e-07	-0.426086	0.0856897	3.84272e-05	0
641	726.2	Pelargonidin 5-O-beta-D-glucoside 3-O-beta-D-sambubioside	C20492	yes	-	1	C20492	C32H39O19	-0.174687	0.0861126	0.00718631	-0.373064	0.0811923	0.000326084	-0.418777	0.11449	0.000202933	-0.163715	0.162491	0.0777514	0
642	745.418	Avermectin A2b monosaccharide	C11958	yes	-	2	C11958; C11973	C41H62O12	-0.577053	0.118365	0.000317273	-0.600591	0.088248	1.62631e-05	-0.651971	0.158116	3.87215e-05	-0.54453	0.116339	0.000203925	0
643	759.433	Avermectin A2a monosaccharide	C11974	no	-	1	C11974	C42H64O12	-0.317135	0.137123	0.00155958	-0.41112	0.0904299	0.000210309	-0.34065	0.104168	0.000226554	-0.30106	0.11124	0.000687505	0
644	786.247	5,10-Methenyltetrahydromethanopterin	C04330	yes	-	1	C04330	C31H44N6O16P	-0.126944	0.12188	0.071317	-0.329674	0.127082	0.0014157	-0.458051	0.127407	9.12399e-05	-0.292798	0.117298	0.00106101	0
645	803.458	Okadaic acid	C01945	yes	Organooxygen compounds	1	C01945	C44H68O13	-0.341615	0.120042	0.000482856	-0.411487	0.0965649	0.000167399	-0.309785	0.130253	0.00172841	-0.330154	0.0564389	1.97566e-05	0
646	805.439	Gymnemic acid I	C08947	no	-	1	C08947	C43H66O14	-0.440738	0.0555882	5.63951e-06	-0.309045	0.0807916	0.000100608	-0.429853	0.0596205	2.10083e-06	-0.39449	0.131976	0.000657039	0
647	807.397	Leurosine	C09219	no	-	1	C09219	C46H56N4O9	-0.444969	0.102079	9.65897e-05	-0.456541	0.102144	3.20449e-05	-0.341002	0.105832	0.000580186	-0.373313	0.0840396	3.83796e-05	0
648	809.412	Vinblastine	C07201	no	Vinca alkaloids	3	C07201; C09218; C11626	C46H58N4O9; C46H58N4O9.	-1.32164	0.115044	1.56441e-07	-1.11582	0.199109	4.25411e-05	-0.82875	0.0791224	3.09761e-07	-1.10222	0.123513	1.4975e-06	3
649	857.47	Avermectin B1b	C11967	yes	-	2	C11967; C20012	C47H70O14	-0.309563	0.0818779	0.000363174	-0.409351	0.167517	0.00121148	-0.362752	0.11226	0.000368277	-0.14271	0.0998272	0.0218488	0
650	869.562	X-206	C15847	no	-	1	C15847	C47H82O14	-0.778448	0.295589	0.00687429	-1.33773	0.245634	0.000279657	-1.10087	0.266145	0.000692982	-0.696775	0.38704	0.00569301	2
651	875.445	Rifapentine	C08059	yes	Naphthofurans	1	C08059	C47H64N4O12	-0.441714	0.122575	0.000441251	-0.599592	0.0881563	2.38536e-06	-0.434595	0.10799	0.000106564	-0.416377	0.107774	7.79835e-05	0
652	895.471	Ophiopogonin C	C17043	no	-	1	C17043	C46H72O17	0.596861	0.140125	0.000172716	0.53245	0.0910154	0.000123754	0.66386	0.114129	2.34698e-05	0.740683	0.133423	6.54815e-05	0
653	939.497	Colubrin	C08936	no	-	3	C08936; C08962; C13837	C48H76O18	0.531331	0.134812	0.000306931	0.437721	0.075438	6.22281e-06	0.624718	0.0987814	8.79516e-05	0.516222	0.13963	0.000374591	0
654	951.447	Anabaenopeptilide 90A	C15691	yes	-	1	C15691	C46H64N8O14	-0.381617	0.126276	0.000376916	-0.426861	0.0804185	6.06102e-05	-0.152878	0.131362	0.0450562	-0.352482	0.109915	0.000476417	0
655	951.493	Microcystin RA	C19996	yes	-	1	C19996	C46H68N10O12	-0.385196	0.0777169	6.95513e-05	-0.382603	0.0827323	6.79673e-05	-0.30187	0.100114	0.000371379	-0.441508	0.132836	0.000213271	0
656	973.585	Megalomicin C2	C11988	no	-	1	C11988	C49H86N2O17	-0.425171	0.307642	0.0200538	-1.07571	0.202547	1.64694e-05	-0.815391	0.329453	0.00331483	-0.442904	0.338582	0.0429635	1
657	978.523	1-Hexadecanoyl-2-(9Z-octadecenoyl)-sn-glycero-3-cytidine-5'-diphosphate	C13892	yes	-	1	C13892	C46H83N3O15P2	-0.182886	0.147159	0.0339884	-0.271358	0.136361	0.0122624	-0.0914104	0.126397	0.184507	-0.23114	0.132444	0.0105145	0

## Sheet: UM_Data alternative annot
ionIdx	ionMz	ionActive	ionQualTIC	ionAverageInt	mz difference	formula	ion	score	name	synonym	hmdb_id	kegg_id	other_ids
1	55.0186	TRUE	0.70207	6520.22	0.000363384	C3H4O	-H(-)	100	Acrolein	Acrolein; Acrylaldehyde; Acrylic aldehyde; Propenal		C01471
1	55.0186	TRUE	0.70207	6520.22	0.000363384	C3H4O	-H(-)	100	2-Propyn-1-ol	1-Hydroxy-2-propyne; 1-Propyn-3-ol; 1-Propyn-3-yl alcohol; 2-Propyn-1-ol; 2-Propynol; 2-Propynyl alcohol; 3-Hydroxy-1-propyne; 3-Propynol; Ethynylcarbinol; NA 1986; Prop-2-in-1-ol; Prop-2-yn-1-ol; Prop-2-yne-1-ol; Propargyl alcohol; Propynyl alcohol		C05986
2	57.0343	TRUE	0.78178	18668.7	0.000325415	C3H6O	-H(-)	100	Acetone	2-Propanone; Acetone; Dimethyl ketone		C00207
2	57.0343	TRUE	0.78178	18668.7	0.000325415	C3H6O	-H(-)	100	Propanal	Propanal; Propionaldehyde		C00479
2	57.0343	TRUE	0.78178	18668.7	0.000325415	C3H6O	-H(-)	100	Allyl alcohol	2-Propen-1-ol; Allyl alcohol		C02001
2	57.0343	TRUE	0.78178	18668.7	0.000325415	C3H6O	-H(-)	100	(2R)-1,2-Epoxypropane	(2R)-1,2-Epoxypropane		C11506
2	57.0343	TRUE	0.78178	18668.7	0.000325415	C3H6O	-H(-)	100	(S)-1,2-Epoxypropane	(S)-1,2-Epoxypropane		C11507
2	57.0343	TRUE	0.78178	18668.7	0.000325415	C3H6O	-H(-)	100	1,2-Epoxypropane	1,2-Epoxypropane; 1,2-Propylene oxide; Propylene oxide		C15508
3	58.0057	TRUE	0.731153	4620.28	0.000278973	C2H3O2.	-H(-)	100	Potassium acetate	Potassium acetate		C12554
4	59.0135	TRUE	0.771561	120603	0.000339355	C2H4O2	-H(-)	100	Acetate	Acetate; Acetic acid; Ethanoic acid		C00033
4	59.0135	TRUE	0.771561	120603	0.000339355	C2H4O2	-H(-)	100	Glycolaldehyde	Glycolaldehyde; Hydroxyacetaldehyde		C00266
5	67.0186	TRUE	0.660924	4763.55	0.000301489	C4H4O	-H(-)	100	3-Butyn-1-al	3-Butyn-1-al		C06145
5	67.0186	TRUE	0.660924	4763.55	0.000301489	C4H4O	-H(-)	100	Furan	Furan		C14275
6	69.0343	TRUE	0.589995	5655.51	0.000276337	C4H6O	-H(-)	100	3-Butyn-1-ol	3-Butyn-1-ol		C06146
6	69.0343	TRUE	0.589995	5655.51	0.000276337	C4H6O	-H(-)	100	Vinyl ether	Vinyl ether		C17721
6	69.0343	TRUE	0.589995	5655.51	0.000276337	C4H6O	-H(-)	100	Crotonaldehyde	2-Butenal; Crotonaldehyde		C19377
6	69.0343	TRUE	0.589995	5655.51	0.000276337	C4H6O	-H(-)	100	But-3-en-2-one	But-1-en-3-one; But-3-en-2-one; Butenone; Methyl vinyl ketone		C20701
7	70.0297	TRUE	0.762063	4922.74	0.000149665	C3H5NO	-H(-)	100	Acrylamide	2-Propenamide; Acrylamide		C01659
8	71.0137	TRUE	0.849031	81519.4	0.000150818	C3H4O2	-H(-)	100	Acrylic acid	2-Propenoic acid; Acrylate; Acrylic acid; Propenoate; Vinylformic acid		C00511
8	71.0137	TRUE	0.849031	81519.4	0.000150818	C3H4O2	-H(-)	100	Methylglyoxal	2-Ketopropionaldehyde; 2-Oxopropanal; Methylglyoxal; Pyruvaldehyde; Pyruvic aldehyde		C00546
8	71.0137	TRUE	0.849031	81519.4	0.000150818	C3H4O2	-H(-)	100	Glycidaldehyde	2-Oxiranecarboxaldehyde; Glycidaldehyde		C19246
8	71.0137	TRUE	0.849031	81519.4	0.000150818	C3H4O2	-H(-)	100	Propiolactone	Propiolactone; beta-Propiolactone		C19297
8	71.0137	TRUE	0.849031	81519.4	0.000150818	C3H4O2	-H(-)	100	Malonaldehyde	Malonaldehyde; Malondialdehyde		C19440
9	72.0089	TRUE	0.755162	4925.71	0.000150102	C2H3NO2	-H(-)	100	Iminoglycine	2-Iminoacetate; Iminoacetic acid; Iminoglycine		C15809
10	72.0453	TRUE	0.81051	3322.43	0.000171625	C3H7NO	-H(-)	100	Aminoacetone	1-Amino-2-propanone; Aminoacetone		C01888
10	72.0453	TRUE	0.81051	3322.43	0.000171625	C3H7NO	-H(-)	100	Acetone oxime	Acetone oxime; Acetoxime		C01995
10	72.0453	TRUE	0.81051	3322.43	0.000171625	C3H7NO	-H(-)	100	N,N-Dimethylformamide	DMF; N,N-Dimethylformamide; N,N-Dimethylmethanamide		C03134
10	72.0453	TRUE	0.81051	3322.43	0.000171625	C3H7NO	-H(-)	100	3-Aminopropanal	3-Aminopropanal; beta-Aminopropion aldehyde		C05665
11	72.9931	TRUE	0.766716	4462.09	6.26643e-05	C2H2O3	-H(-)	100	Glyoxylate	Glyoxalate; Glyoxylate; Glyoxylic acid		C00048
12	73.0294	TRUE	0.897409	44105.4	6.33784e-05	C3H6O2	-H(-)	100	Propanoate	Propanoate; Propanoic acid; Propionate; Propionic acid		C00163
12	73.0294	TRUE	0.897409	44105.4	6.33784e-05	C3H6O2	-H(-)	100	(S)-Lactaldehyde	(S)-Lactaldehyde; L-2-Hydroxypropionaldehyde; L-Lactaldehyde		C00424
12	73.0294	TRUE	0.897409	44105.4	6.33784e-05	C3H6O2	-H(-)	100	(R)-Lactaldehyde	(R)-Lactaldehyde; D-2-Hydroxypropionaldehyde; D-Lactaldehyde		C00937
12	73.0294	TRUE	0.897409	44105.4	6.33784e-05	C3H6O2	-H(-)	100	3-Hydroxypropanal	3-Hydroxypropanal		C00969
12	73.0294	TRUE	0.897409	44105.4	6.33784e-05	C3H6O2	-H(-)	100	Hydroxyacetone	1-Hydroxy-2-propanone; 2-Ketopropyl alcohol; Acetol; Acetone alcohol; Hydroxyacetone; Methylketol; Pyruvic alcohol; Pyruvinalcohol		C05235
12	73.0294	TRUE	0.897409	44105.4	6.33784e-05	C3H6O2	-H(-)	100	Lactaldehyde	2-Hydroxypropanal; 2-Hydroxypropionaldehyde; Lactaldehyde		C05999
12	73.0294	TRUE	0.897409	44105.4	6.33784e-05	C3H6O2	-H(-)	100	Glycidol	Glycidol		C10920
12	73.0294	TRUE	0.897409	44105.4	6.33784e-05	C3H6O2	-H(-)	100	Methyl acetate	Devoton; Methyl acetate; Tereton		C17530
13	74.0247	TRUE	0.852996	51650.3	6.37767e-05	C2H5NO2	-H(-)	100	Glycine	Aminoacetic acid; Gly; Glycine		C00037
13	74.0247	TRUE	0.852996	51650.3	6.37767e-05	C2H5NO2	-H(-)	100	Nitroethane	Nitroethane		C01837
13	74.0247	TRUE	0.852996	51650.3	6.37767e-05	C2H5NO2	-H(-)	100	Acetohydroxamic acid	Acetohydroxamic acid		C06808
13	74.0247	TRUE	0.852996	51650.3	6.37767e-05	C2H5NO2	-H(-)	100	Methyl carbamate	Methyl carbamate		C19445
14	75.0088	TRUE	0.809095	11811.5	-1.03277e-05	C2H4O3	-H(-)	100	Glycolate	Glycolate; Glycolic acid; Hydroxyacetic acid		C00160
15	83.0135	TRUE	0.771793	10477.8	0.000355672	C4H4O2	-H(-)	100	4-Hydroxy-2-butynal	4-Hydroxy-2-butynal; 4-Hydroxybut-2-ynal		C02648
15	83.0135	TRUE	0.771793	10477.8	0.000355672	C4H4O2	-H(-)	100	3-Butynoate	3-Butynoate; But-3-ynoate		C06144
15	83.0135	TRUE	0.771793	10477.8	0.000355672	C4H4O2	-H(-)	100	2(5H)-Furanone	2(5H)-Furanone; Butenolide; gamma-Crotonolactone		C17601
15	83.0135	TRUE	0.771793	10477.8	0.000355672	C4H4O2	-H(-)	100	2(3H)-Furanone	2(3H)-Furanone; alpha-Crotonolactone		C17602
16	85.0294	TRUE	0.897783	81663.2	6.47286e-05	C4H6O2	-H(-)	100	Diacetyl	2,3-Butanedione; Biacetyl; Diacetyl; Dimethylglyoxal		C00741
16	85.0294	TRUE	0.897783	81663.2	6.47286e-05	C4H6O2	-H(-)	100	gamma-Butyrolactone	1,4-Lactone; gamma-Butyrolactone		C01770
16	85.0294	TRUE	0.897783	81663.2	6.47286e-05	C4H6O2	-H(-)	100	2-Butenoate	2-Butenoate; 2-Butenoic acid; 3-Methylacrylic acid; Crotonic acid		C01771
16	85.0294	TRUE	0.897783	81663.2	6.47286e-05	C4H6O2	-H(-)	100	2-Butyne-1,4-diol	1,4-Butynediol; 2-Butyne-1,4-diol		C02497
16	85.0294	TRUE	0.897783	81663.2	6.47286e-05	C4H6O2	-H(-)	100	Cyclopropanecarboxylate	Cyclopropanecarboxylate		C16267
16	85.0294	TRUE	0.897783	81663.2	6.47286e-05	C4H6O2	-H(-)	100	Succinic aldehyde	Succindialdehyde; Succinic aldehyde		C16835
16	85.0294	TRUE	0.897783	81663.2	6.47286e-05	C4H6O2	-H(-)	100	beta-Butyrolactone	beta-Butyrolactone		C19201
16	85.0294	TRUE	0.897783	81663.2	6.47286e-05	C4H6O2	-H(-)	100	Vinyl acetate	Vinyl acetate		C19309
16	85.0294	TRUE	0.897783	81663.2	6.47286e-05	C4H6O2	-H(-)	100	Methyl acrylate	Methyl acrylate		C19443
17	85.0658	TRUE	0.688704	2375.16	4.16536e-05	C5H10O	-H(-)	100	Prenol	3-Methyl-2-buten-1-ol; Prenol; Prenyl alcohol		C01390
17	85.0658	TRUE	0.688704	2375.16	4.16536e-05	C5H10O	-H(-)	100	Pentan-2-one	2-Pentanone; Methyl propyl ketone; Pentan-2-one		C01949
17	85.0658	TRUE	0.688704	2375.16	4.16536e-05	C5H10O	-H(-)	100	Cyclopentanol	Cyclopentanol; Cyclopentyl alcohol		C02020
17	85.0658	TRUE	0.688704	2375.16	4.16536e-05	C5H10O	-H(-)	100	2-Methylbutanal	2-Methylbutanal; 2-Methylbutyraldehyde		C02223
17	85.0658	TRUE	0.688704	2375.16	4.16536e-05	C5H10O	-H(-)	100	3-Methylbutanal	3-Methylbutanal; Isovaleraldehyde		C07329
18	87.0087	TRUE	0.833888	20974.2	4.24883e-05	C3H4O3	-H(-)	100	Pyruvate	2-Oxopropanoate; 2-Oxopropanoic acid; Pyroracemic acid; Pyruvate; Pyruvic acid		C00022
18	87.0087	TRUE	0.833888	20974.2	4.24883e-05	C3H4O3	-H(-)	100	3-Oxopropanoate	3-Oxopropanoate; Malonate semialdehyde		C00222
18	87.0087	TRUE	0.833888	20974.2	4.24883e-05	C3H4O3	-H(-)	100	3-Hydroxypropenoate	3-Hydroxypropenoate		C12069
18	87.0087	TRUE	0.833888	20974.2	4.24883e-05	C3H4O3	-H(-)	100	Ethylene carbonate	1,3-Dioxolan-2-one; Ethylene carbonate		C20363
19	88.0403	TRUE	0.895753	43925.8	6.33355e-05	C3H7NO2	-H(-)	100	L-Alanine	L-2-Aminopropionic acid; L-Alanine; L-alpha-Alanine		C00041
19	88.0403	TRUE	0.895753	43925.8	6.33355e-05	C3H7NO2	-H(-)	100	beta-Alanine	3-Aminopropanoate; 3-Aminopropionic acid; beta-Alanine		C00099
19	88.0403	TRUE	0.895753	43925.8	6.33355e-05	C3H7NO2	-H(-)	100	D-Alanine	D-2-Aminopropionic acid; D-Ala; D-Alanine		C00133
19	88.0403	TRUE	0.895753	43925.8	6.33355e-05	C3H7NO2	-H(-)	100	Sarcosine	N-Methylglycine; Sarcosine		C00213
19	88.0403	TRUE	0.895753	43925.8	6.33355e-05	C3H7NO2	-H(-)	100	Alanine	2-Aminopropanoic acid; 2-Aminopropionic acid; Alanine		C01401
19	88.0403	TRUE	0.895753	43925.8	6.33355e-05	C3H7NO2	-H(-)	100	Urethane	Ethyl carbamate; Urethane		C01537
19	88.0403	TRUE	0.895753	43925.8	6.33355e-05	C3H7NO2	-H(-)	100	2-Nitropropane	2-Nitropropane		C02116
19	88.0403	TRUE	0.895753	43925.8	6.33355e-05	C3H7NO2	-H(-)	100	HMMF	HMMF; N-Hydroxymethyl-N-methylformamide		C11488
20	89.0245	TRUE	0.769296	2.04172e+06	-7.61974e-05	C3H6O3	-H(-)	100	Glycerone	1,3-Dihydroxy-2-propanone; 1,3-Dihydroxyacetone; 1,3-Dihydroxypropan-2-one; Dihydroxyacetone; Glycerone		C00184
20	89.0245	TRUE	0.769296	2.04172e+06	-7.61974e-05	C3H6O3	-H(-)	100	(S)-Lactate	(S)-Lactate; L-Lactate; L-Lactic acid		C00186
20	89.0245	TRUE	0.769296	2.04172e+06	-7.61974e-05	C3H6O3	-H(-)	100	(R)-Lactate	(R)-Lactate; D-2-Hydroxypropanoic acid; D-2-Hydroxypropionic acid; D-Lactate; D-Lactic acid		C00256
20	89.0245	TRUE	0.769296	2.04172e+06	-7.61974e-05	C3H6O3	-H(-)	100	D-Glyceraldehyde	D-Glyceraldehyde		C00577
20	89.0245	TRUE	0.769296	2.04172e+06	-7.61974e-05	C3H6O3	-H(-)	100	3-Hydroxypropanoate	3-Hydroxypropanoate; 3-Hydroxypropanoic acid; 3-Hydroxypropionate; 3-Hydroxypropionic acid; Hydracrylic acid		C01013
20	89.0245	TRUE	0.769296	2.04172e+06	-7.61974e-05	C3H6O3	-H(-)	100	Lactate	2-Hydroxypropanoic acid; 2-Hydroxypropionic acid; Lactate; Lactic acid		C01432
20	89.0245	TRUE	0.769296	2.04172e+06	-7.61974e-05	C3H6O3	-H(-)	100	Glyceraldehyde	2,3-Dihydroxypropanal; 2,3-Dihydroxypropionaldehyde; Aldotriose; Glyceraldehyde; Glycerose		C02154
20	89.0245	TRUE	0.769296	2.04172e+06	-7.61974e-05	C3H6O3	-H(-)	100	L-Glyceraldehyde	L-2,3-Dihydroxypropanal; L-2,3-Dihydroxypropionaldehyde; L-Aldotriose; L-Glyceraldehyde; L-Glycerose		C02426
21	93.0345	TRUE	0.657808	55529.2	8.36157e-05	C6H6O	-H(-)	100	Phenol	Benzenol; Hydroxybenzene; Phenic acid; Phenol; Phenylic acid		C00146
21	93.0345	TRUE	0.657808	55529.2	8.36157e-05	C6H6O	-H(-)	100	Arene oxide	Arene oxide		C01782
21	93.0345	TRUE	0.657808	55529.2	8.36157e-05	C6H6O	-H(-)	100	Phenol	Phenol		C15584
22	94.0298	TRUE	0.588585	52251.9	7.41572e-05	C5H5NO	-H(-)	100	2-Hydroxypyridine	2-Hydroxypyridine; 2-Pyridinol; 2-Pyridone		C02502
23	98.0246	TRUE	0.312123	80801.4	0.000116574	C4H5NO2	-H(-)	100	Succinimide	2,5-Diketopyrrolidine; 2,5-Pyrrolidinedione; Butanimide; Succinimide		C07273
23	98.0246	TRUE	0.312123	80801.4	0.000116574	C4H5NO2	-H(-)	100	Hymexazol	Hymexazol		C11103
24	98.061	TRUE	0.474072	5999.12	0.000129009	C5H9NO	-H(-)	100	N-Methyl-2-pyrrolidinone	1-Methyl-2-pyrrolidinone; N-Methyl-2-pyrrolidinone; N-Methylpyrrolidone		C11118
24	98.061	TRUE	0.474072	5999.12	0.000129009	C5H9NO	-H(-)	100	(2R)-2-Hydroxy-2-methylbutanenitrile	(2R)-2-Hydroxy-2-methylbutanenitrile; 2-Hydroxy-2-methylbutanenitrile		C18796
25	100.04	TRUE	0.659308	30535.4	-7.05434e-05	C4H7NO2	-H(-)	100	1-Aminocyclopropane-1-carboxylate	1-Aminocyclopropane-1-carboxylate; 1-Aminocyclopropane-1-carboxylic acid		C01234
25	100.04	TRUE	0.659308	30535.4	-7.05434e-05	C4H7NO2	-H(-)	100	Homoserine lactone	2-Aminobutan-4-olide; Homoserine lactone		C02926
25	100.04	TRUE	0.659308	30535.4	-7.05434e-05	C4H7NO2	-H(-)	100	Diacetylmonoxime	2,3-Butanedione monoxime; Diacetylmonoxime		C07509
25	100.04	TRUE	0.659308	30535.4	-7.05434e-05	C4H7NO2	-H(-)	100	L-Azetidine 2-carboxylic acid	(S)-(-)-Azetidine-2-carboxylic acid; Azetidyl-2-carboxylic acid; L-Azetidine 2-carboxylic acid		C08267
25	100.04	TRUE	0.659308	30535.4	-7.05434e-05	C4H7NO2	-H(-)	100	3-Oxobutanamide	3-Oxobutanamide; AAA; Acetoacetamide		C11106
25	100.04	TRUE	0.659308	30535.4	-7.05434e-05	C4H7NO2	-H(-)	100	2-Aminobut-2-enoate	(2Z)-2-Aminobut-2-enoic acid; 2-Aminobut-2-enoate; 2-Ammoniobut-2-enoate		C17234
25	100.04	TRUE	0.659308	30535.4	-7.05434e-05	C4H7NO2	-H(-)	100	N-Methylolacrylamide	N-(Hydroxymethyl)acrylamide; N-Methylolacrylamide		C19456
25	100.04	TRUE	0.659308	30535.4	-7.05434e-05	C4H7NO2	-H(-)	100	L-Homoserine lactone	L-Homoserine lactone		C19777
26	102.019	TRUE	0.210079	8210.79	0.000300783	C3H5NO3	-H(-)	100	Pyruvate oxime	Pyruvate oxime		C02193
26	102.019	TRUE	0.210079	8210.79	0.000300783	C3H5NO3	-H(-)	100	2-Aminomalonate semialdehyde	2-Aminomalonate semialdehyde; 2-Ammoniomalonate semialdehyde		C11822
26	102.019	TRUE	0.210079	8210.79	0.000300783	C3H5NO3	-H(-)	100	(Z)-3-Peroxyaminoacrylate	(Z)-3-Peroxyaminoacrylate		C20249
27	102.056	TRUE	0.959783	288942	2.87852e-05	C4H9NO2	-H(-)	100	4-Aminobutanoate	4-Aminobutanoate; 4-Aminobutanoic acid; 4-Aminobutyrate; 4-Aminobutyric acid; GABA; gamma-Aminobutyric acid		C00334
27	102.056	TRUE	0.959783	288942	2.87852e-05	C4H9NO2	-H(-)	100	N,N-Dimethylglycine	Dimethylglycine; N,N-Dimethylglycine		C01026
27	102.056	TRUE	0.959783	288942	2.87852e-05	C4H9NO2	-H(-)	100	(R)-3-Amino-2-methylpropanoate	(R)-3-Amino-2-methylpropanoate; D-3-Amino-isobutanoate		C01205
27	102.056	TRUE	0.959783	288942	2.87852e-05	C4H9NO2	-H(-)	100	D-2-Aminobutyrate	(R)-2-Aminobutanoic acid; D-2-Aminobutanoic acid; D-2-Aminobutyrate; D-2-Aminobutyric acid		C02261
27	102.056	TRUE	0.959783	288942	2.87852e-05	C4H9NO2	-H(-)	100	(S)-2-Aminobutanoate	(S)-2-Aminobutanoate; (S)-2-Aminobutanoic acid; (S)-2-Aminobutyric acid		C02356
27	102.056	TRUE	0.959783	288942	2.87852e-05	C4H9NO2	-H(-)	100	N-Methyl-L-alanine	N-Methyl-L-alanine		C02721
27	102.056	TRUE	0.959783	288942	2.87852e-05	C4H9NO2	-H(-)	100	L-3-Amino-isobutanoate	(S)-3-Amino-2-methylpropanoate; (S)-3-Amino-isobutanoate; (S)-3-Amino-isobutyrate; L-3-Amino-isobutanoate; L-3-Amino-isobutyrate		C03284
27	102.056	TRUE	0.959783	288942	2.87852e-05	C4H9NO2	-H(-)	100	2-Amino-2-methylpropanoate	2-Amino-2-methylpropanoate; 2-Aminoisobutyric acid		C03665
27	102.056	TRUE	0.959783	288942	2.87852e-05	C4H9NO2	-H(-)	100	3-Aminoisobutyric acid	3-Amino-2-methylpropanoate; 3-Aminoisobutanoate; 3-Aminoisobutyric acid		C05145
27	102.056	TRUE	0.959783	288942	2.87852e-05	C4H9NO2	-H(-)	100	HBA	HBA		C11109
27	102.056	TRUE	0.959783	288942	2.87852e-05	C4H9NO2	-H(-)	100	N-Ethylglycine	N-Ethylglycine		C11735
27	102.056	TRUE	0.959783	288942	2.87852e-05	C4H9NO2	-H(-)	100	n-Propyl carbamate	n-Propyl carbamate		C19514
28	104.035	TRUE	0.816322	239394	-2.65028e-05	C3H7NO3	-H(-)	100	L-Serine	L-2-Amino-3-hydroxypropionic acid; L-3-Hydroxy-alanine; L-Serine; Serine		C00065
28	104.035	TRUE	0.816322	239394	-2.65028e-05	C3H7NO3	-H(-)	100	Serine	2-Amino-3-hydroxypropionic acid; 3-Hydroxyalanine; Serine		C00716
28	104.035	TRUE	0.816322	239394	-2.65028e-05	C3H7NO3	-H(-)	100	D-Serine	D-Serine		C00740
29	105.019	TRUE	0.799962	62218.7	5.1656e-05	C3H6O4	-H(-)	100	D-Glycerate	(R)-Glycerate; D-Glycerate; Glycerate; Glyceric acid		C00258
30	105.056	TRUE	0.512202	5485.86	0.00015942	C4H10O3	-H(-)	100	Diethylene glycol	1,5-Dihydroxy-3-oxapentane; 2,2'-Oxydiethanol; Diethylene glycol		C14689
31	107.05	TRUE	0.791291	36094.2	0.000220643	C7H8O	-H(-)	100	Benzyl alcohol	Benzenemethanol; Benzyl alcohol; Hydroxymethylbenzene; Phenylcarbinol; Phenylmethanol; alpha-Hydroxytoluene		C00556
31	107.05	TRUE	0.791291	36094.2	0.000220643	C7H8O	-H(-)	100	Anisole	Anisole; Methoxybenzene; Methyl phenyl ether; Phenol methyl ether		C01403
31	107.05	TRUE	0.791291	36094.2	0.000220643	C7H8O	-H(-)	100	3-Cresol	3-Cresol; 3-Hydroxytoluene; m-Cresol		C01467
31	107.05	TRUE	0.791291	36094.2	0.000220643	C7H8O	-H(-)	100	4-Cresol	4-Cresol; 4-Hydroxytoluene; 4-Methylphenol; p-Cresol		C01468
31	107.05	TRUE	0.791291	36094.2	0.000220643	C7H8O	-H(-)	100	o-Cresol	2-Hydroxytoluene; o-Cresol; o-Methylphenol		C01542
31	107.05	TRUE	0.791291	36094.2	0.000220643	C7H8O	-H(-)	100	Aromatic primary alcohol	Aromatic alcohol; Aromatic primary alcohol		C03485
32	108.021	TRUE	0.737453	14196.4	0.000954336	C6H5O2	-H(-)	100	p-Benzosemiquinone	4-Hydroxyphenoxy radical; p-Benzosemiquinone		C02389
32	108.021	TRUE	0.737453	14196.4	0.000954336	C6H5O2	-H(-)	100	o-Benzosemiquinone	2-Hydroxyphenoxy radical; o-Benzosemiquinone		C05060
33	108.045	TRUE	0.584448	42430.4	2.60798e-05	C6H7NO	-H(-)	100	2-Aminophenol	2-Aminobenzenol; 2-Aminophenol; 2-Hydroxyaniline; o-Aminophenol		C01987
33	108.045	TRUE	0.584448	42430.4	2.60798e-05	C6H7NO	-H(-)	100	4-Hydroxyaniline	4-Aminobenzenol; 4-Aminophenol; 4-Hydroxyaniline; p-Aminophenol		C02372
33	108.045	TRUE	0.584448	42430.4	2.60798e-05	C6H7NO	-H(-)	100	Hydroxylaminobenzene	(Hydroxyamino)benzene; Hydroxylaminobenzene		C02720
33	108.045	TRUE	0.584448	42430.4	2.60798e-05	C6H7NO	-H(-)	100	m-Aminophenol	3-Aminophenol; 3-Hydroxyaniline; m-Aminophenol		C05058
34	109.03	TRUE	0.740702	33438.4	-3.1506e-05	C6H6O2	-H(-)	100	Catechol	1,2-Benzenediol; 1,2-Dihydroxybenzene; Brenzcatechin; Catechol; Pyrocatechol; o-Benzenediol		C00090
34	109.03	TRUE	0.740702	33438.4	-3.1506e-05	C6H6O2	-H(-)	100	Hydroquinone	1,4-Benzenediol; 1,4-Dihydroxybenzene; 4-Hydroxyphenol; Benzene-1,4-diol; Hydroquinone; Quinol; p-Benzenediol		C00530
34	109.03	TRUE	0.740702	33438.4	-3.1506e-05	C6H6O2	-H(-)	100	Resorcinol	1,3-Benzenediol; 1,3-Dihydroxybenzene; Resorcin; Resorcinol; m-Hydroquinone		C01751
34	109.03	TRUE	0.740702	33438.4	-3.1506e-05	C6H6O2	-H(-)	100	Benzenediol	Benzenediol		C01785
34	109.03	TRUE	0.740702	33438.4	-3.1506e-05	C6H6O2	-H(-)	100	5-Methyl-2-furaldehyde	5-Methyl-2-furaldehyde; 5-Methyl-2-furfural		C11115
34	109.03	TRUE	0.740702	33438.4	-3.1506e-05	C6H6O2	-H(-)	100	Catechol	Catechol		C15571
35	109.041	TRUE	0.014893	65162.6	-2.01016e-05	C5H6N2O	-H(-)	100	N-Acetylimidazole	1-Acetyl-1H-imidazole; N-Acetylimidazole		C02560
35	109.041	TRUE	0.014893	65162.6	-2.01016e-05	C5H6N2O	-H(-)	100	Imidazole-4-acetaldehyde	Imidazole acetaldehyde; Imidazole-4-acetaldehyde		C05130
36	110.025	TRUE	0.758759	44397.5	6.38998e-05	C5H5NO2	-H(-)	100	2,5-Dihydroxypyridine	2,5-Dihydroxypyridine		C01059
36	110.025	TRUE	0.758759	44397.5	6.38998e-05	C5H5NO2	-H(-)	100	3,4-Dihydroxypyridine	3,4-Dihydroxypyridine		C02932
36	110.025	TRUE	0.758759	44397.5	6.38998e-05	C5H5NO2	-H(-)	100	2,6-Dihydroxypyridine	2,6-Dihydroxypyridine		C03056
36	110.025	TRUE	0.758759	44397.5	6.38998e-05	C5H5NO2	-H(-)	100	3-Hydroxy-4H-pyrid-4-one	3-Hydroxy-4(1H)-pyridinone; 3-Hydroxy-4H-pyrid-4-one; 3-Hydroxypyridin-4(1H)-one		C03927
36	110.025	TRUE	0.758759	44397.5	6.38998e-05	C5H5NO2	-H(-)	100	Pyrrole-2-carboxylate	Pyrrole-2-carboxylate		C05942
37	110.036	TRUE	0.726555	23887.1	2.81334e-05	C4H5N3O	-H(-)	100	Cytosine	Cytosine		C00380
38	110.061	TRUE	0.582594	3988.31	0.000108007	C6H9NO	-H(-)	100	N-Vinyl-2-pyrrolidone	1-Ethenyl-2-pyrrolidinone; N-Vinyl-2-pyrrolidone		C19548
39	111.009	TRUE	0.641727	184220	5.32314e-06	C5H4O3	-H(-)	100	2-Furoate	2-Furancarboxylic acid; 2-Furoate; 2-Furoic acid; Pyromucic acid		C01546
40	111.02	TRUE	0.876983	227385	-8.45321e-05	C4H4N2O2	-H(-)	100	Uracil	Uracil		C00106
40	111.02	TRUE	0.876983	227385	-8.45321e-05	C4H4N2O2	-H(-)	100	Maleic hydrazide	Maleic hydrazide		C18474
41	112.04	TRUE	0.639446	23004.2	0.000124081	C5H7NO2	-H(-)	100	1-Pyrroline-2-carboxylate	1-Pyrroline 2-carboxylate; 1-Pyrroline-2-carboxylate; 1-Pyrroline-2-carboxylic acid; delta1-Pyrroline 2-carboxylate		C03564
41	112.04	TRUE	0.639446	23004.2	0.000124081	C5H7NO2	-H(-)	100	(S)-1-Pyrroline-5-carboxylate	(S)-1-Pyrroline-5-carboxylate; 1-Pyrroline-5-carboxylate; L-1-Pyrroline-5-carboxylate		C03912
41	112.04	TRUE	0.639446	23004.2	0.000124081	C5H7NO2	-H(-)	100	delta-1-Pyrroline-5-carboxylate	3,4-Dihydro-2H-Pyrrole-2-carboxylate; delta-1-Pyrroline-5-carboxylate		C04322
41	112.04	TRUE	0.639446	23004.2	0.000124081	C5H7NO2	-H(-)	100	Glutarimide	2,6-Diketopiperidine; Glutarimide; Piperidine-2,6-dione		C07275
42	112.052	TRUE	0.673414	13269	3.54058e-05	C4H7N3O	-H(-)	100	Creatinine	1-Methylglycocyamidine; Creatinine		C00791
42	112.052	TRUE	0.673414	13269	3.54058e-05	C4H7N3O	-H(-)	100	3-(N-Nitrosomethylamino)propionitrile	3-(Methylnitrosamino)propionitrile; 3-(N-Nitrosomethylamino)propionitrile		C19280
43	113.024	TRUE	0.908974	479052	-5.60246e-06	C5H6O3	-H(-)	100	2-Hydroxy-2,4-pentadienoate	2-Hydroxy-2,4-pentadienoate; 2-Hydroxypenta-2,4-dienoate; 2-Oxopent-4-enoate; Oxopent-4-enoate; cis-2-Hydroxypenta-2,4-dienoate		C00596
43	113.024	TRUE	0.908974	479052	-5.60246e-06	C5H6O3	-H(-)	100	cis-Acetylacrylate	cis-Acetylacrylate		C07091
44	113.036	TRUE	0.916205	195037	-0.000156194	C4H6N2O2	-H(-)	100	5,6-Dihydrouracil	2,4-Dioxotetrahydropyrimidine; 5,6-Dihydro-2,4-dihydroxypyrimidine; 5,6-Dihydrouracil; Dihydro-2,4(1H,3H)-pyrimidinedione; Dihydrouracil; Dihydrouracile; Hydrouracil		C00429
44	113.036	TRUE	0.916205	195037	-0.000156194	C4H6N2O2	-H(-)	100	3-Cyano-L-alanine	3-Cyano-L-alanine; L-3-Cyanoalanine; L-beta-Cyanoalanine		C02512
44	113.036	TRUE	0.916205	195037	-0.000156194	C4H6N2O2	-H(-)	100	N-Methylhydantoin	N-Methylhydantoin; N-Methylimidazolidine-2,4-dione		C02565
44	113.036	TRUE	0.916205	195037	-0.000156194	C4H6N2O2	-H(-)	100	2,5-Dioxopiperazine	2,5-Diazacyclohexane-1,4-dione; 2,5-Dioxopiperazine; 2,5-Piperazinedione; Diketopiperazine; Glycine anhydride		C02777
44	113.036	TRUE	0.916205	195037	-0.000156194	C4H6N2O2	-H(-)	100	Muscimol	Muscimol		C08311
45	114.02	TRUE	0.901785	46066.6	1.96538e-05	C4H5NO3	-H(-)	100	Maleamate	Maleamate; Maleamic acid		C01596
46	114.056	TRUE	0.933294	3.23052e+06	-0.000238223	C5H9NO2	-H(-)	100	L-Proline	2-Pyrrolidinecarboxylic acid; L-Proline		C00148
46	114.056	TRUE	0.933294	3.23052e+06	-0.000238223	C5H9NO2	-H(-)	100	D-Proline	D-Proline		C00763
46	114.056	TRUE	0.933294	3.23052e+06	-0.000238223	C5H9NO2	-H(-)	100	Proline	Proline		C16435
46	114.056	TRUE	0.933294	3.23052e+06	-0.000238223	C5H9NO2	-H(-)	100	3-Acetamidopropanal	3-Acetamidopropanal		C18170
47	115.004	TRUE	0.91629	34910.4	-0.000329073	C4H4O4	-H(-)	100	Fumarate	Fumarate; Fumaric acid; trans-Butenedioic acid		C00122
47	115.004	TRUE	0.91629	34910.4	-0.000329073	C4H4O4	-H(-)	100	Maleic acid	Maleate; Maleic acid; cis-Butenedioic acid		C01384
47	115.004	TRUE	0.91629	34910.4	-0.000329073	C4H4O4	-H(-)	100	Formylpyruvate	Formylpyruvate		C02150
48	115.04	TRUE	0.682367	31105.7	-9.93722e-06	C5H8O3	-H(-)	100	3-Methyl-2-oxobutanoic acid	2-Keto-3-methylbutyric acid; 2-Ketovaline; 2-Oxo-3-methylbutanoate; 2-Oxoisopentanoate; 2-Oxoisovalerate; 3-Methyl-2-oxobutanoate; 3-Methyl-2-oxobutanoic acid; 3-Methyl-2-oxobutyric acid; alpha-Ketovaline		C00141
48	115.04	TRUE	0.682367	31105.7	-9.93722e-06	C5H8O3	-H(-)	100	3-Oxopentanoic acid	3-Oxopentanoate; 3-Oxopentanoic acid		C02233
48	115.04	TRUE	0.682367	31105.7	-9.93722e-06	C5H8O3	-H(-)	100	5-Oxopentanoate	5-Oxopentanoate; Glutarate semialdehyde		C03273
48	115.04	TRUE	0.682367	31105.7	-9.93722e-06	C5H8O3	-H(-)	100	2-Oxopentanoic acid	2-Oxopentanoate; 2-Oxopentanoic acid; 2-Oxovalerate; alpha-Ketovaleric acid		C06255
49	115.088	TRUE	0.876462	12085.9	-0.000557708	C5H12N2O	-H(-)	100	5-Aminopentanamide	5-Aminopentanamide		C00990
50	116.035	TRUE	0.796822	59293.5	-8.10819e-06	C4H7NO3	-H(-)	100	L-Aspartate 4-semialdehyde	Aspartate beta-semialdehyde; L-Aspartate 4-semialdehyde; L-Aspartic 4-semialdehyde		C00441
50	116.035	TRUE	0.796822	59293.5	-8.10819e-06	C4H7NO3	-H(-)	100	2-Amino-3-oxobutanoate	2-Amino-3-oxobutanoate; 2-Amino-acetoacetate		C03214
50	116.035	TRUE	0.796822	59293.5	-8.10819e-06	C4H7NO3	-H(-)	100	L-2-Amino-3-oxobutanoic acid	(S)-2-Amino-3-oxobutanoic acid; L-2-Amino-3-oxobutanoate; L-2-Amino-3-oxobutanoic acid; L-2-Amino-acetoacetate		C03508
50	116.035	TRUE	0.796822	59293.5	-8.10819e-06	C4H7NO3	-H(-)	100	(Z)-2-Methylperoxyaminoacrylate	(Z)-2-Methylperoxyaminoacrylate		C20250
51	116.072	TRUE	0.922441	1.27335e+06	-0.000138337	C5H11NO2	-H(-)	100	L-Valine	2-Amino-3-methylbutyric acid; L-Valine		C00183
51	116.072	TRUE	0.922441	1.27335e+06	-0.000138337	C5H11NO2	-H(-)	100	5-Aminopentanoate	5-Aminopentanoate; 5-Aminopentanoic acid; 5-Aminovaleric acid		C00431
51	116.072	TRUE	0.922441	1.27335e+06	-0.000138337	C5H11NO2	-H(-)	100	Betaine	Betaine; Glycine betaine; N,N,N-Trimethylglycine; Trimethylaminoacetate; Trimethylammonioacetate		C00719
51	116.072	TRUE	0.922441	1.27335e+06	-0.000138337	C5H11NO2	-H(-)	100	D-Norvaline	D-2-Aminopentanoic acid; D-2-Aminovaleric acid; D-Norvaline		C01799
51	116.072	TRUE	0.922441	1.27335e+06	-0.000138337	C5H11NO2	-H(-)	100	L-Norvaline	(S)-2-Aminopentanoic acid; L-2-Aminopentanoic acid; L-2-Aminovaleric acid; L-Norvaline		C01826
51	116.072	TRUE	0.922441	1.27335e+06	-0.000138337	C5H11NO2	-H(-)	100	2-Amino-2-methylbutanoate	2-Amino-2-methylbutanoate		C03571
51	116.072	TRUE	0.922441	1.27335e+06	-0.000138337	C5H11NO2	-H(-)	100	D-Valine	(R)-2-Amino-3-methylbutyric acid; D-Valine		C06417
51	116.072	TRUE	0.922441	1.27335e+06	-0.000138337	C5H11NO2	-H(-)	100	Amyl nitrite	Amyl nitrite; Isoamyl nitrite		C07457
51	116.072	TRUE	0.922441	1.27335e+06	-0.000138337	C5H11NO2	-H(-)	100	4-Methylaminobutyrate	4-Methylaminobutyrate; gamma-N-Methylaminobutyrate		C15987
51	116.072	TRUE	0.922441	1.27335e+06	-0.000138337	C5H11NO2	-H(-)	100	Valine	Valine		C16436
52	117.019	TRUE	0.933552	365766	-2.23703e-05	C4H6O4	-H(-)	100	Succinate	Butanedionic acid; Ethylenesuccinic acid; Succinate; Succinic acid		C00042
52	117.019	TRUE	0.933552	365766	-2.23703e-05	C4H6O4	-H(-)	100	Methylmalonate	Methylmalonate; Methylmalonic acid		C02170
52	117.019	TRUE	0.933552	365766	-2.23703e-05	C4H6O4	-H(-)	100	Methyl oxalate	Methyl oxalate		C10900
53	117.034	TRUE	0.848077	86005.6	0.00023035	C8H6O	-H(-)	100	Benzofuran	Benzofuran		C14512
54	118.051	TRUE	0.811952	249030	-6.26164e-05	C4H9NO3	-H(-)	100	L-Threonine	2-Amino-3-hydroxybutyric acid; L-Threonine		C00188
54	118.051	TRUE	0.811952	249030	-6.26164e-05	C4H9NO3	-H(-)	100	L-Homoserine	2-Amino-4-hydroxybutyric acid; L-Homoserine		C00263
54	118.051	TRUE	0.811952	249030	-6.26164e-05	C4H9NO3	-H(-)	100	D-Threonine	D-2-Amino-3-hydroxybutyric acid; D-Threonine		C00820
54	118.051	TRUE	0.811952	249030	-6.26164e-05	C4H9NO3	-H(-)	100	2-Methylserine	2-Methylserine		C02115
54	118.051	TRUE	0.811952	249030	-6.26164e-05	C4H9NO3	-H(-)	100	4-Amino-3-hydroxybutanoate	4-Amino-3-hydroxybutanoate; 4-Amino-3-hydroxybutanoic acid; GABOB; gamma-Amino-beta-hydroxybutyric acid		C03678
54	118.051	TRUE	0.811952	249030	-6.26164e-05	C4H9NO3	-H(-)	100	L-Allothreonine	L-Allothreonine; L-allo-Threonine		C05519
54	118.051	TRUE	0.811952	249030	-6.26164e-05	C4H9NO3	-H(-)	100	(-)-erythro-(2R,3R)-Dihydroxybutylamide	(-)-erythro-(2R,3R)-Dihydroxybutylamide; DBA		C11108
54	118.051	TRUE	0.811952	249030	-6.26164e-05	C4H9NO3	-H(-)	100	D-Allothreonine	D-Allothreonine; D-allo-Threonine		C12317
55	118.981	TRUE	0.737305	425086	0.000193286	C3H4O3S	-H(-)	100	Mercaptopyruvate	3-Mercaptopyruvate; 3-Mercaptopyruvic acid; Mercaptopyruvate		C00957
56	119.035	TRUE	0.784474	249833	-2.781e-05	C4H8O4	-H(-)	100	D-Erythrose	D-Erythrose		C01796
56	119.035	TRUE	0.784474	249833	-2.781e-05	C4H8O4	-H(-)	100	D-Erythrulose	D-Erythrulose; D-glycero-Tetrulose		C02022
56	119.035	TRUE	0.784474	249833	-2.781e-05	C4H8O4	-H(-)	100	L-Erythrulose	L-Erythrulose; L-glycero-Tetrulose		C02045
56	119.035	TRUE	0.784474	249833	-2.781e-05	C4H8O4	-H(-)	100	D-Threose	D-Threose; D-threo-Tetrose		C06463
57	119.05	TRUE	0.850325	291093	6.36964e-05	C8H8O	-H(-)	100	Phenylacetaldehyde	Phenylacetaldehyde; alpha-Tolualdehyde		C00601
57	119.05	TRUE	0.850325	291093	6.36964e-05	C8H8O	-H(-)	100	Styrene oxide	Styrene oxide; Styrene-7,8-oxide		C02083
57	119.05	TRUE	0.850325	291093	6.36964e-05	C8H8O	-H(-)	100	4-Hydroxystyrene	4-Hydroxystyrene; 4-Vinylphenol		C05627
57	119.05	TRUE	0.850325	291093	6.36964e-05	C8H8O	-H(-)	100	p-Tolualdehyde	4-Methylbenzaldehyde; 4-Toluylaldehyde; p-Formyltoluene; p-Methylbenzaldehyde; p-Tolualdehyde		C06758
57	119.05	TRUE	0.850325	291093	6.36964e-05	C8H8O	-H(-)	100	Acetophenone	1-Phenylethanone; Acetophenone; Acetylbenzene; Methyl phenyl ketone; Phenyl methyl ketone		C07113
57	119.05	TRUE	0.850325	291093	6.36964e-05	C8H8O	-H(-)	100	3-Methylbenzaldehyde	3-Methylbenzaldehyde; m-Tolualdehyde		C07209
57	119.05	TRUE	0.850325	291093	6.36964e-05	C8H8O	-H(-)	100	2-Methylbenzaldehyde	2-Formyltoluene; 2-Methylbenzaldehyde; o-Tolualdehyde; o-Toluic aldehyde		C07214
57	119.05	TRUE	0.850325	291093	6.36964e-05	C8H8O	-H(-)	100	(S)-2-Phenyloxirane	(S)-2-Phenyloxirane; (S)-Styrene oxide		C20782
58	120.045	TRUE	0.640648	10397.7	7.2628e-05	C7H7NO	-H(-)	100	Benzamide	Benzamide		C09815
59	121.03	TRUE	0.628628	110935	-0.000328607	C7H6O2	-H(-)	100	Benzoate	Benzenecarboxylic acid; Benzoate; Benzoic acid; Dracylic acid; Phenylformic acid		C00180
59	121.03	TRUE	0.628628	110935	-0.000328607	C7H6O2	-H(-)	100	Aromatic acid	Aromatic acid; Aromatic carboxylic acid		C00539
59	121.03	TRUE	0.628628	110935	-0.000328607	C7H6O2	-H(-)	100	4-Hydroxybenzaldehyde	4-Hydroxybenzaldehyde; p-Hydroxybenzaldehyde		C00633
59	121.03	TRUE	0.628628	110935	-0.000328607	C7H6O2	-H(-)	100	3-Hydroxybenzaldehyde	3-Hydroxybenzaldehyde		C03067
59	121.03	TRUE	0.628628	110935	-0.000328607	C7H6O2	-H(-)	100	Salicylaldehyde	2-Hydroxybenzaldehyde; Salicylaldehyde; o-Hydroxybenzaldehyde		C06202
59	121.03	TRUE	0.628628	110935	-0.000328607	C7H6O2	-H(-)	100	Tropolone	Tropolone		C15474
60	121.041	TRUE	0.661666	23322	-0.000611368	C6H6N2O	-H(-)	100	Nicotinamide	Niacinamide; Nicotinamide; Nicotinic acid amide; Vitamin PP		C00153
60	121.041	TRUE	0.661666	23322	-0.000611368	C6H6N2O	-H(-)	100	Picolinamide	Picolinamide		C01950
60	121.041	TRUE	0.661666	23322	-0.000611368	C6H6N2O	-H(-)	100	Isonicotineamide	Isonicotinamide; Isonicotineamide		C02421
61	121.066	TRUE	0.576092	8339.08	0.000167472	C8H10O	-H(-)	100	Phenylethyl alcohol	2-Phenylethanol; Phenethyl alcohol; Phenylethyl alcohol		C05853
61	121.066	TRUE	0.576092	8339.08	0.000167472	C8H10O	-H(-)	100	4-Methylbenzyl alcohol	4-Methylbenzyl alcohol; 4-Tolylcarbinol; alpha-Hydroxy-p-xylene		C06757
61	121.066	TRUE	0.576092	8339.08	0.000167472	C8H10O	-H(-)	100	1-Phenylethanol	1-Phenylethanol; Methylphenyl carbinol; alpha-Methylbenzyl alcohol		C07112
61	121.066	TRUE	0.576092	8339.08	0.000167472	C8H10O	-H(-)	100	2-Methylbenzyl alcohol	2-Methylbenzyl alcohol		C07213
61	121.066	TRUE	0.576092	8339.08	0.000167472	C8H10O	-H(-)	100	3-Methylbenzyl alcohol	3-Methylbenzyl alcohol		C07216
61	121.066	TRUE	0.576092	8339.08	0.000167472	C8H10O	-H(-)	100	(S)-1-Phenylethanol	(S)-1-Phenethyl alcohol; (S)-1-Phenylethanol		C11348
61	121.066	TRUE	0.576092	8339.08	0.000167472	C8H10O	-H(-)	100	4-Ethylphenol	4-Ethylphenol; p-Ethylphenol		C13637
61	121.066	TRUE	0.576092	8339.08	0.000167472	C8H10O	-H(-)	100	2-Ethylphenol	2-Ethylphenol; o-Ethylphenol		C14385
61	121.066	TRUE	0.576092	8339.08	0.000167472	C8H10O	-H(-)	100	3-Ethylphenol	3-Ethylphenol		C14386
61	121.066	TRUE	0.576092	8339.08	0.000167472	C8H10O	-H(-)	100	2,4-Dimethylphenol	1-Hydroxy-2,4-dimethylbenzene; 2,4-Dimethylphenol		C14582
62	122.025	TRUE	0.706541	58675.2	4.40074e-05	C6H5NO2	-H(-)	100	Nicotinate	3-Pyridinecarboxylic acid; Niacin; Nicotinate; Nicotinic acid		C00253
62	122.025	TRUE	0.706541	58675.2	4.40074e-05	C6H5NO2	-H(-)	100	Nitrobenzene	Nitrobenzene; Nitrobenzol		C06813
62	122.025	TRUE	0.706541	58675.2	4.40074e-05	C6H5NO2	-H(-)	100	Isonicotinic acid	Isonicotinic acid		C07446
62	122.025	TRUE	0.706541	58675.2	4.40074e-05	C6H5NO2	-H(-)	100	Picolinic acid	2-Pyridinecarboxylic acid; Picolinic acid		C10164
63	122.061	TRUE	0.669656	11035	3.60447e-05	C7H9NO	-H(-)	100	ortho-Anisidine	o-Anisidine; ortho-Anisidine		C19191
63	122.061	TRUE	0.669656	11035	3.60447e-05	C7H9NO	-H(-)	100	para-Anisidine	1-Amino-4-methoxybenzene; para-Anisidine		C19326
64	125.024	TRUE	0.630506	167142	4.91796e-05	C6H6O3	-H(-)	100	1,2,3-Trihydroxybenzene	1,2,3-Benzenetriol; 1,2,3-Trihydroxybenzene; Pyrogallic acid; Pyrogallol		C01108
64	125.024	TRUE	0.630506	167142	4.91796e-05	C6H6O3	-H(-)	100	Phloroglucinol	1,3,5-Benzenetriol; 1,3,5-Trihydroxybenzene; Phloroglucinol		C02183
64	125.024	TRUE	0.630506	167142	4.91796e-05	C6H6O3	-H(-)	100	Triacetate lactone	4-Hydroxy-6-methyl-2-pyrone; Triacetate lactone		C02752
64	125.024	TRUE	0.630506	167142	4.91796e-05	C6H6O3	-H(-)	100	Benzene-1,2,4-triol	1,2,4-Benzenetriol; 1,2,4-Trihydroxybenzene; Benzene-1,2,4-triol; Hydroxyhydroquinone; Hydroxyquinol		C02814
64	125.024	TRUE	0.630506	167142	4.91796e-05	C6H6O3	-H(-)	100	5-Hydroxymethyl-2-furaldehyde	5-Hydroxymethyl-2-furaldehyde; 5-Hydroxymethylfurfural; HMF		C11101
64	125.024	TRUE	0.630506	167142	4.91796e-05	C6H6O3	-H(-)	100	Maltol	Maltol		C11918
64	125.024	TRUE	0.630506	167142	4.91796e-05	C6H6O3	-H(-)	100	4-Hydroxy-5-methyl-2-methylenefuran-3(2H)-one	4-Hydroxy-5-methyl-2-methylenefuran-3(2H)-one		C20718
65	125.097	TRUE	0.292388	11774.8	0.000206095	C8H14O	-H(-)	100	Sulcatone	6-Methyl-5-hepten-2-one; 6-Methylhept-5-en-2-one; Methylheptenone; Sulcatone		C07287
66	126.019	TRUE	0.661492	10039.5	0.000226678	C5H5NO3	-H(-)	100	2,3,6-Trihydroxypyridine	2,3,6-Trihydroxypyridine		C03458
66	126.019	TRUE	0.661492	10039.5	0.000226678	C5H5NO3	-H(-)	100	5-Hydroxypyrrole-2-carboxylate	5-Hydroxypyrrole-2-carboxylate		C19721
67	126.056	TRUE	0.383778	19530.3	-7.31908e-06	C6H9NO2	-H(-)	100	(S)-2,3,4,5-Tetrahydropyridine-2-carboxylate	(S)-2,3,4,5-Tetrahydropyridine-2-carboxylate; delta1-Piperideine-6-L-carboxylate		C00450
67	126.056	TRUE	0.383778	19530.3	-7.31908e-06	C6H9NO2	-H(-)	100	delta1-Piperideine-2-carboxylate	1,2-Didehydropiperidine-2-carboxylate; delta1-Piperideine-2-carboxylate		C04092
67	126.056	TRUE	0.383778	19530.3	-7.31908e-06	C6H9NO2	-H(-)	100	L-Baikiain	4,5-Dehydropipecolic acid; L-Baikiain		C08268
67	126.056	TRUE	0.383778	19530.3	-7.31908e-06	C6H9NO2	-H(-)	100	alpha-(Methylenecyclopropyl)glycine	alpha-(Methylenecyclopropyl)glycine		C08292
67	126.056	TRUE	0.383778	19530.3	-7.31908e-06	C6H9NO2	-H(-)	100	Guvacine	Guvacine		C10149
67	126.056	TRUE	0.383778	19530.3	-7.31908e-06	C6H9NO2	-H(-)	100	Isoguvacine	Isoguvacine		C13694
68	127.04	TRUE	0.568716	16802.9	3.17886e-05	C6H8O3	-H(-)	100	Dihydro-4,4-dimethyl-2,3-furandione	2-Dehydropantolactone; 2-Dehydropantoyl lactone; Dihydro-4,4-dimethyl-2,3-furandione		C01125
68	127.04	TRUE	0.568716	16802.9	3.17886e-05	C6H8O3	-H(-)	100	Dihydrophloroglucinol	Dihydrophloroglucinol		C06719
68	127.04	TRUE	0.568716	16802.9	3.17886e-05	C6H8O3	-H(-)	100	(4E)-2-Oxohexenoic acid	(4E)-2-Oxohexenoic acid; 2-Oxohex-trans-4-enoate		C06761
68	127.04	TRUE	0.568716	16802.9	3.17886e-05	C6H8O3	-H(-)	100	2-Hydroxy-cis-hex-2,4-dienoate	2-Hydroxy-cis-hex-2,4-dienoate		C11354
68	127.04	TRUE	0.568716	16802.9	3.17886e-05	C6H8O3	-H(-)	100	(2Z,4Z)-2-Hydroxyhexa-2,4-dienoate	(2Z,4Z)-2-Hydroxyhexa-2,4-dienoate; (2Z,4Z)-2-Hydroxyhexa-2,4-dienoic acid		C20240
68	127.04	TRUE	0.568716	16802.9	3.17886e-05	C6H8O3	-H(-)	100	5-Hydroxymethylfurfuryl alcohol	2,5-Bis(hydroxymethyl)furan; 5-Hydroxymethylfurfuryl alcohol		C20443
68	127.04	TRUE	0.568716	16802.9	3.17886e-05	C6H8O3	-H(-)	100	4-Hydroxy-2,5-dimethylfuran-3(2H)-one	4-Hydroxy-2,5-dimethylfuran-3(2H)-one; Dimethylhydroxy furanone		C20717
69	127.051	TRUE	0.895341	133978	5.66304e-05	C5H8N2O2	-H(-)	100	5,6-Dihydrothymine	5,6-Dihydro-5-methyluracil; 5,6-Dihydrothymine; Dihydrothymine		C00906
69	127.051	TRUE	0.895341	133978	5.66304e-05	C5H8N2O2	-H(-)	100	gamma-Amino-gamma-cyanobutanoate	4-Amino-4-cyanobutanoic acid; gamma-Amino-gamma-cyanobutanoate		C05715
69	127.051	TRUE	0.895341	133978	5.66304e-05	C5H8N2O2	-H(-)	100	alpha-Amino-gamma-cyanobutanoate	2-Amino-4-cyanobutanoic acid; alpha-Amino-gamma-cyanobutanoate		C05717
70	127.076	TRUE	0.674136	16421.4	0.00018399	C7H12O2	-H(-)	100	Ethyl tiglate	(E)-2-Methyl-2-butenoic acid ethyl ester; Ethyl 2-methylbut-2-enoate; Ethyl tiglate		C08487
70	127.076	TRUE	0.674136	16421.4	0.00018399	C7H12O2	-H(-)	100	Cyclohexane-1-carboxylate	Cyclohexane-1-carboxylate; Cyclohexanecarboxylic acid; Hexahydrobenzoic acid		C09822
70	127.076	TRUE	0.674136	16421.4	0.00018399	C7H12O2	-H(-)	100	Butyl acrylate	Butyl acrylate		C10921
70	127.076	TRUE	0.674136	16421.4	0.00018399	C7H12O2	-H(-)	100	1-Oxa-2-oxo-3-methylcycloheptane	1-Oxa-2-oxo-3-methylcycloheptane		C10976
70	127.076	TRUE	0.674136	16421.4	0.00018399	C7H12O2	-H(-)	100	3-Isopropyl-3-butenoic acid	3-Isopropyl-3-butenoic acid; 3-Isopropylbut-3-enoic acid		C11950
70	127.076	TRUE	0.674136	16421.4	0.00018399	C7H12O2	-H(-)	100	alpha-EMGBL	2-Ethyl-2-methyl-4-butyrolactone; alpha-EMGBL		C13714
70	127.076	TRUE	0.674136	16421.4	0.00018399	C7H12O2	-H(-)	100	beta-EMGBL	beta-EMGBL; beta-Ethyl-beta-methyl-gamma-butyrolactone		C13717
71	128.035	TRUE	0.913784	3.22354e+06	-4.17917e-05	C5H7NO3	-H(-)	100	4-Oxoproline	4-Oxo-L-proline; 4-Oxoproline		C01877
71	128.035	TRUE	0.913784	3.22354e+06	-4.17917e-05	C5H7NO3	-H(-)	100	Pidolic acid	5-Oxo-L-proline; 5-Oxoproline; 5-Pyrrolidone-2-carboxylic acid; L-5-Pyrrolidone-2-carboxylic acid; L-Pyroglutamic acid; Pidolic acid; Pyroglutamate; Pyroglutamic acid		C01879
71	128.035	TRUE	0.913784	3.22354e+06	-4.17917e-05	C5H7NO3	-H(-)	100	5-Oxo-D-proline	5-Oxo-D-proline; D-5-Pyrrolidone-2-carboxylic acid; D-Pyroglutamic acid		C02237
71	128.035	TRUE	0.913784	3.22354e+06	-4.17917e-05	C5H7NO3	-H(-)	100	L-1-Pyrroline-3-hydroxy-5-carboxylate	(3R,5S)-1-Pyrroline-3-hydroxy-5-carboxylate; 3-Hydroxy-L-1-pyrroline-5-carboxylate; L-1-Pyrroline-3-hydroxy-5-carboxylate		C04281
71	128.035	TRUE	0.913784	3.22354e+06	-4.17917e-05	C5H7NO3	-H(-)	100	1-Pyrroline-4-hydroxy-2-carboxylate	1-Pyrroline-4-hydroxy-2-carboxylate		C04282
72	128.072	TRUE	0.90964	87265.7	-6.12438e-05	C6H11NO2	-H(-)	100	L-Pipecolate	(S)-Piperidine-2-carboxylic acid; 2-Piperidinecarboxylic acid; L-Pipecolate; Pipecolic acid; Pipecolinic acid		C00408
72	128.072	TRUE	0.90964	87265.7	-6.12438e-05	C6H11NO2	-H(-)	100	1-Aminocyclopentanecarboxylate	1-Aminocyclopentanecarboxylate; 1-Aminocyclopentanecarboxylic acid; Cycloleucine		C03969
72	128.072	TRUE	0.90964	87265.7	-6.12438e-05	C6H11NO2	-H(-)	100	N4-Acetylaminobutanal	4-Acetamidobutanal; N4-Acetylaminobutanal		C05936
72	128.072	TRUE	0.90964	87265.7	-6.12438e-05	C6H11NO2	-H(-)	100	Vigabatrin	Vigabatrin		C07500
72	128.072	TRUE	0.90964	87265.7	-6.12438e-05	C6H11NO2	-H(-)	100	trans-3-Aminocyclopentane-1-carboxylic acid	trans-3-Aminocyclopentane-1-carboxylic acid		C13696
73	129.019	TRUE	0.936032	166258	-6.82212e-05	C5H6O4	-H(-)	100	2,5-Dioxopentanoate	2,5-Dioxopentanoate; 2-Oxoglutarate semialdehyde		C00433
73	129.019	TRUE	0.936032	166258	-6.82212e-05	C5H6O4	-H(-)	100	Itaconate	Itaconate; Itaconic acid; Methylenesuccinic acid		C00490
73	129.019	TRUE	0.936032	166258	-6.82212e-05	C5H6O4	-H(-)	100	Mesaconate	(E)-2-Methyl-2-butenedioic acid; 2-Methylfumarate; Mesaconate; Mesaconic acid; Methylfumaric acid		C01732
73	129.019	TRUE	0.936032	166258	-6.82212e-05	C5H6O4	-H(-)	100	Acetylpyruvate	2,4-Dioxopentanoate; Acetylpyruvate; Acetylpyruvic acid		C02132
73	129.019	TRUE	0.936032	166258	-6.82212e-05	C5H6O4	-H(-)	100	(E)-Glutaconate	(E)-Glutaconate; Glutaconic acid; trans-Glutaconate; trans-Glutaconic acid		C02214
73	129.019	TRUE	0.936032	166258	-6.82212e-05	C5H6O4	-H(-)	100	2-Methylmaleate	2-Methylmaleate; Citraconate; Citraconic acid; Methylmaleic acid		C02226
73	129.019	TRUE	0.936032	166258	-6.82212e-05	C5H6O4	-H(-)	100	4,5-Dioxopentanoate	4,5-Dioxopentanoate; 4-Oxoglutarate semialdehyde		C02800
74	129.055	TRUE	0.795901	45674.1	0.000243727	C6H10O3	-H(-)	100	4-Methyl-2-oxopentanoate	2-Oxoisocaproate; 4-Methyl-2-oxopentanoate		C00233
74	129.055	TRUE	0.795901	45674.1	0.000243727	C6H10O3	-H(-)	100	(S)-3-Methyl-2-oxopentanoic acid	(3S)-3-Methyl-2-oxopentanoate; (3S)-3-Methyl-2-oxopentanoic acid; (S)-3-Methyl-2-oxopentanoate; (S)-3-Methyl-2-oxopentanoic acid		C00671
74	129.055	TRUE	0.795901	45674.1	0.000243727	C6H10O3	-H(-)	100	2-Oxohexanoic acid	2-Oxohexanoate; 2-Oxohexanoic acid; alpha-Ketocaproic acid		C00902
74	129.055	TRUE	0.795901	45674.1	0.000243727	C6H10O3	-H(-)	100	(R)-Pantolactone	(3R)-Dihydro-3-hydroxy-4,4-dimethyl-2(3H)-furanone; (R)-Pantolactone; (R)-Pantoyl lactone		C01012
74	129.055	TRUE	0.795901	45674.1	0.000243727	C6H10O3	-H(-)	100	3-Oxohexanoic acid	3-Oxohexanoate; 3-Oxohexanoic acid		C02122
74	129.055	TRUE	0.795901	45674.1	0.000243727	C6H10O3	-H(-)	100	5-Oxohexanoic acid	4-Acetylbutyric acid; 5-Oxohexanoate; 5-Oxohexanoic acid		C02129
74	129.055	TRUE	0.795901	45674.1	0.000243727	C6H10O3	-H(-)	100	6-Hydroxyhexan-6-olide	6-Hydroxy-6-hexanolactone; 6-Hydroxyhexan-6-olide		C03241
74	129.055	TRUE	0.795901	45674.1	0.000243727	C6H10O3	-H(-)	100	3-Methyl-2-oxopentanoate	2-Oxo-3-methylvalerate; 3-Methyl-2-oxopentanoate		C03465
74	129.055	TRUE	0.795901	45674.1	0.000243727	C6H10O3	-H(-)	100	beta-Ketoisocaproate	3-Oxo-4-methylpentanoate; 4-Methyl-3-oxopentanoic acid; beta-Ketoisocaproate; beta-Ketoisocaproic acid		C03467
74	129.055	TRUE	0.795901	45674.1	0.000243727	C6H10O3	-H(-)	100	Ethyl 3-oxobutanoate	Ethyl 3-oxobutanoate; Ethyl acetoacetate		C03500
74	129.055	TRUE	0.795901	45674.1	0.000243727	C6H10O3	-H(-)	100	(3R)-3-Methyl-2-oxopentanoic acid	(3R)-3-Methyl-2-oxopentanoic acid; (R)-2-Oxo-3-methylpentanoate; (R)-2-Oxo-3-methylpentanoic acid		C06008
74	129.055	TRUE	0.795901	45674.1	0.000243727	C6H10O3	-H(-)	100	Adipate semialdehyde	6-Oxohexanoate; 6-Oxohexanoic acid; Adipate semialdehyde; Hexan-1-one-6-carboxylate		C06102
74	129.055	TRUE	0.795901	45674.1	0.000243727	C6H10O3	-H(-)	100	1-Oxa-2-oxo-3-hydroxycycloheptane	1-Oxa-2-oxo-3-hydroxycycloheptane		C12314
74	129.055	TRUE	0.795901	45674.1	0.000243727	C6H10O3	-H(-)	100	2-Hydroxyethyl methacrylate	2-Hydroxyethyl methacrylate; HEMA		C14530
75	129.067	TRUE	0.764824	9240.17	-0.000364722	C5H10N2O2	-H(-)	100	Cucurbitine	Cucurbitine		C10140
75	129.067	TRUE	0.764824	9240.17	-0.000364722	C5H10N2O2	-H(-)	100	(R)-Piperazine-2-carboxylic acid	(R)-2-Piperazinecarboxylate; (R)-Piperazine-2-carboxylic acid		C19780
75	129.067	TRUE	0.764824	9240.17	-0.000364722	C5H10N2O2	-H(-)	100	(S)-Piperazine-2-carboxylic acid	(S)-2-Piperazinecarboxylate; (S)-Piperazine-2-carboxylic acid		C19783
76	129.092	TRUE	0.720212	46896.7	1.62212e-05	C7H14O2	-H(-)	100	Ethyl isovalerate	Ethyl isovalerate		C12290
76	129.092	TRUE	0.720212	46896.7	1.62212e-05	C7H14O2	-H(-)	100	Isoamyl acetate	Isoamyl acetate		C12296
76	129.092	TRUE	0.720212	46896.7	1.62212e-05	C7H14O2	-H(-)	100	Heptanoic acid	Heptanoic acid		C17714
77	130.051	TRUE	0.92811	123840	-4.36284e-05	C5H9NO3	-H(-)	100	5-Aminolevulinate	5-Amino-4-oxopentanoate; 5-Amino-4-oxovaleric acid; 5-Aminolevulinate		C00430
77	130.051	TRUE	0.92811	123840	-4.36284e-05	C5H9NO3	-H(-)	100	cis-4-Hydroxy-L-proline	L-Allohydroxyproline; cis-4-Hydroxy-L-proline		C01015
77	130.051	TRUE	0.92811	123840	-4.36284e-05	C5H9NO3	-H(-)	100	N-Acetyl-beta-alanine	N-Acetyl-beta-alanine		C01073
77	130.051	TRUE	0.92811	123840	-4.36284e-05	C5H9NO3	-H(-)	100	5-Amino-2-oxopentanoic acid	2-Oxo-5-amino-pentanoate; 2-Oxo-5-aminopentanoate; 2-Oxo-5-aminovalerate; 5-Amino-2-oxopentanoate; 5-Amino-2-oxopentanoic acid; alpha-Keto-delta-aminopentanoate		C01110
77	130.051	TRUE	0.92811	123840	-4.36284e-05	C5H9NO3	-H(-)	100	Hydroxyproline	Hydroxyproline; L-Hydroxyproline; trans-4-Hydroxy-L-proline		C01157
77	130.051	TRUE	0.92811	123840	-4.36284e-05	C5H9NO3	-H(-)	100	L-Glutamate 5-semialdehyde	L-Glutamate 5-semialdehyde; L-Glutamate gamma-semialdehyde		C01165
77	130.051	TRUE	0.92811	123840	-4.36284e-05	C5H9NO3	-H(-)	100	2-Amino-4-oxopentanoic acid	2-Amino-4-oxopentanoate; 2-Amino-4-oxopentanoic acid		C03341
77	130.051	TRUE	0.92811	123840	-4.36284e-05	C5H9NO3	-H(-)	100	cis-4-Hydroxy-D-proline	cis-4-Hydroxy-D-proline		C03440
77	130.051	TRUE	0.92811	123840	-4.36284e-05	C5H9NO3	-H(-)	100	trans-4-Hydroxy-D-proline	trans-4-Hydroxy-D-proline		C03651
77	130.051	TRUE	0.92811	123840	-4.36284e-05	C5H9NO3	-H(-)	100	(S)-4-Amino-5-oxopentanoate	(S)-4-Amino-5-oxopentanoate; L-Glutamate 1-semialdehyde		C03741
77	130.051	TRUE	0.92811	123840	-4.36284e-05	C5H9NO3	-H(-)	100	trans-3-Hydroxy-L-proline	trans-3-Hydroxy-L-proline; trans-L-3-Hydroxyproline		C05147
77	130.051	TRUE	0.92811	123840	-4.36284e-05	C5H9NO3	-H(-)	100	cis-3-Hydroxy-L-proline	cis-3-Hydroxy-L-proline; cis-3-Hydroxyproline		C19706
78	131.046	TRUE	0.888686	403020	-3.66361e-05	C4H8N2O3	-H(-)	100	L-Asparagine	2-Aminosuccinamic acid; L-Asparagine		C00152
78	131.046	TRUE	0.888686	403020	-3.66361e-05	C4H8N2O3	-H(-)	100	N-Carbamoylsarcosine	N-Carbamoylsarcosine		C01043
78	131.046	TRUE	0.888686	403020	-3.66361e-05	C4H8N2O3	-H(-)	100	D-Asparagine	D-Asparagine		C01905
78	131.046	TRUE	0.888686	403020	-3.66361e-05	C4H8N2O3	-H(-)	100	Glycylglycine	Glycylglycine; N-Glycylglycine		C02037
78	131.046	TRUE	0.888686	403020	-3.66361e-05	C4H8N2O3	-H(-)	100	3-Ureidopropionate	3-Ureidopropanoate; 3-Ureidopropionate; N-Carbamoyl-beta-alanine; beta-Ureidopropionic acid		C02642
78	131.046	TRUE	0.888686	403020	-3.66361e-05	C4H8N2O3	-H(-)	100	Asparagine	Asparagine		C16438
78	131.046	TRUE	0.888686	403020	-3.66361e-05	C4H8N2O3	-H(-)	100	Methylazoxymethanol acetate	Methylazoxymethanol acetate		C19258
78	131.046	TRUE	0.888686	403020	-3.66361e-05	C4H8N2O3	-H(-)	100	N-Nitroso-N-methylurethane	N-Nitroso-N-methylurethane		C19301
79	131.071	TRUE	0.789542	256048	6.29883e-05	C6H12O3	-H(-)	100	D-2-Hydroxyisocaproate	D-2-Hydroxyisocaproate		C03264
79	131.071	TRUE	0.789542	256048	6.29883e-05	C6H12O3	-H(-)	100	Ethyl (R)-3-hydroxybutanoate	Ethyl (R)-3-hydroxybutanoate		C03499
79	131.071	TRUE	0.789542	256048	6.29883e-05	C6H12O3	-H(-)	100	6-Hydroxyhexanoic acid	6-Hydroxyhexanoate; 6-Hydroxyhexanoic acid		C06103
79	131.071	TRUE	0.789542	256048	6.29883e-05	C6H12O3	-H(-)	100	Paraldehyde	Paraldehyde		C07834
80	131.083	TRUE	0.966697	704317	-2.92462e-05	C5H12N2O2	-H(-)	100	L-Ornithine	(S)-2,5-Diaminopentanoate; (S)-2,5-Diaminopentanoic acid; (S)-2,5-Diaminovaleric acid; L-Ornithine		C00077
80	131.083	TRUE	0.966697	704317	-2.92462e-05	C5H12N2O2	-H(-)	100	D-Ornithine	D-Ornithine		C00515
80	131.083	TRUE	0.966697	704317	-2.92462e-05	C5H12N2O2	-H(-)	100	Ornithine	2,5-Diaminopentanoate; 2,5-Diaminopentanoic acid; 2,5-Diaminovaleric acid; Ornithine		C01602
80	131.083	TRUE	0.966697	704317	-2.92462e-05	C5H12N2O2	-H(-)	100	(2R,4S)-2,4-Diaminopentanoate	(2R,4S)-2,4-Diaminopentanoate; 2,4-Diaminopentanoate; D-threo-2,4-Diaminopentanoate		C03943
80	131.083	TRUE	0.966697	704317	-2.92462e-05	C5H12N2O2.	-H(-)	100	D-Ornithine hydrochloride	D-Ornithine hydrochloride		C11320
81	132.03	TRUE	0.943478	413737	-4.46328e-07	C4H7NO4	-H(-)	100	L-Aspartate	2-Aminosuccinic acid; L-Asp; L-Aspartate; L-Aspartic acid		C00049
81	132.03	TRUE	0.943478	413737	-4.46328e-07	C4H7NO4	-H(-)	100	D-Aspartate	D-Aspartate; D-Aspartic acid		C00402
81	132.03	TRUE	0.943478	413737	-4.46328e-07	C4H7NO4	-H(-)	100	Aspartate	Aspartate; Aspartic acid		C16433
81	132.03	TRUE	0.943478	413737	-4.46328e-07	C4H7NO4	-H(-)	100	Iminodiacetate	Iminodiacetate		C19911
82	132.067	TRUE	0.879306	17815.7	4.18273e-05	C5H11NO3	-H(-)	100	N-Hydroxy-L-valine	N-Hydroxy-L-valine		C20313
83	133.014	TRUE	0.916697	177563	-6.53828e-05	C4H6O5	-H(-)	100	(S)-Malate	(S)-Malate; L-2-Hydroxybutanedioic acid; L-Apple acid; L-Malate; L-Malic acid; Malate; Malic acid		C00149
83	133.014	TRUE	0.916697	177563	-6.53828e-05	C4H6O5	-H(-)	100	(R)-Malate	(R)-Malate; D-Malate; D-Malic acid		C00497
83	133.014	TRUE	0.916697	177563	-6.53828e-05	C4H6O5	-H(-)	100	Malate	2-Hydroxybutanedioic acid; Malate; Malic acid		C00711
83	133.014	TRUE	0.916697	177563	-6.53828e-05	C4H6O5	-H(-)	100	3-Dehydro-L-threonate	3-Dehydro-L-threonate		C03064
84	133.051	TRUE	0.801737	179571	-5.99085e-05	C5H10O4	-H(-)	100	Deoxyribose	2-Deoxy-D-erythro-pentose; 2-Deoxy-D-ribose; Deoxyribose; Thyminose		C01801
84	133.051	TRUE	0.801737	179571	-5.99085e-05	C5H10O4	-H(-)	100	2-Deoxy-L-arabinose	2-Deoxy-L-arabinose		C02783
84	133.051	TRUE	0.801737	179571	-5.99085e-05	C5H10O4	-H(-)	100	2,3-Dihydroxy-3-methylbutanoate	2,3-Dihydroxy-3-methylbutanoate; 2,3-Dihydroxy-isovalerate; 2,3-Dihydroxy-isovaleric acid		C04039
84	133.051	TRUE	0.801737	179571	-5.99085e-05	C5H10O4	-H(-)	100	(R)-2,3-Dihydroxy-3-methylbutanoate	(2R)-2,3-Dihydroxy-3-methylbutanoate; (R)-2,3-Dihydroxy-3-methylbutanoate; (R)-2,3-Dihydroxy-isovalerate; (R)-2,3-Dihydroxy-isovaleric acid		C04272
84	133.051	TRUE	0.801737	179571	-5.99085e-05	C5H10O4	-H(-)	100	1-Deoxy-D-xylulose	1-Deoxy-D-xylulose		C06257
84	133.051	TRUE	0.801737	179571	-5.99085e-05	C5H10O4	-H(-)	100	2-Deoxy-alpha-D-ribopyranose	2-Deoxy-alpha-D-ribopyranose		C08347
85	135.031	TRUE	0.815864	345123	0.000111415	C5H4N4O	-H(-)	100	Hypoxanthine	Hypoxanthine; Purine-6-ol		C00262
86	135.045	TRUE	0.915071	201336	-0.00014286	C8H8O2	-H(-)	100	Phenyl acetate	Acetic acid,phenyl ester; Acetylphenol; Phenyl acetate		C00548
86	135.045	TRUE	0.915071	201336	-0.00014286	C8H8O2	-H(-)	100	Toluate	4-Methylbenzoic acid; Crithminic acid; Toluate; Toluenecarboxylic acid; p-Toluate; p-Toluic acid		C01454
86	135.045	TRUE	0.915071	201336	-0.00014286	C8H8O2	-H(-)	100	4-Hydroxyphenylacetaldehyde	2-(4-Hydroxyphenyl)acetaldehyde; 4-Hydroxyphenylacetaldehyde		C03765
86	135.045	TRUE	0.915071	201336	-0.00014286	C8H8O2	-H(-)	100	Benzylformate	Benzylformate		C05613
86	135.045	TRUE	0.915071	201336	-0.00014286	C8H8O2	-H(-)	100	3,4-Dihydroxystyrene	3,4-Dihydroxystyrene		C06224
86	135.045	TRUE	0.915071	201336	-0.00014286	C8H8O2	-H(-)	100	3-Vinylcatechol	3-Vinylcatechol		C07085
86	135.045	TRUE	0.915071	201336	-0.00014286	C8H8O2	-H(-)	100	Phenylacetic acid	Benzeneacetic acid; Benzylformic acid; Phenylacetate; Phenylacetic acid		C07086
86	135.045	TRUE	0.915071	201336	-0.00014286	C8H8O2	-H(-)	100	2-Hydroxyacetophenone	2-Hydroxyacetophenone; omega-Hydroxyacetophenone		C07189
86	135.045	TRUE	0.915071	201336	-0.00014286	C8H8O2	-H(-)	100	m-Methylbenzoate	beta-Bethylbenzoic acid; m-Methylbenzoate; m-Toluic Acid; m-Toluylic acid		C07211
86	135.045	TRUE	0.915071	201336	-0.00014286	C8H8O2	-H(-)	100	o-Toluate	2-Methylbenzoic acid; o-Methylbenzoate; o-Toluate; o-Toluic Acid		C07215
86	135.045	TRUE	0.915071	201336	-0.00014286	C8H8O2	-H(-)	100	4'-Hydroxyacetophenone	(4-Hydroxyphenyl)ethan-1-one; 4'-Hydroxyacetophenone		C10700
86	135.045	TRUE	0.915071	201336	-0.00014286	C8H8O2	-H(-)	100	p-Anisaldehyde	p-Anisaldehyde		C10761
86	135.045	TRUE	0.915071	201336	-0.00014286	C8H8O2	-H(-)	100	3-Methylsalicylaldehyde	2-Hydroxy-3-methylbenzaldehyde; 3-Methylsalicylaldehyde		C14087
86	135.045	TRUE	0.915071	201336	-0.00014286	C8H8O2	-H(-)	100	Phenyl acetate	Phenyl acetate		C15583
86	135.045	TRUE	0.915071	201336	-0.00014286	C8H8O2	-H(-)	100	Methyl benzoate	Methyl benzoate		C20645
87	136.016	TRUE	0.51383	5254.36	0.000180722	C7H5O3.	-H(-)	100	Sodium salicylate	Sodium salicylate		C07587
88	136.039	TRUE	0.721407	26765.7	0.00104182	C7H7NO2	-H(-)	93	Anthranilate	2-Aminobenzoate; Anthranilate; Anthranilic acid; Vitamin L1; o-Aminobenzoic acid		C00108
88	136.039	TRUE	0.721407	26765.7	0.00104182	C7H7NO2	-H(-)	93	4-Aminobenzoate	4-Aminobenzoate; 4-Aminobenzoic acid; ABEE; p-Aminobenzoate		C00568
88	136.039	TRUE	0.721407	26765.7	0.00104182	C7H7NO2	-H(-)	93	N-Methylnicotinate	1-Methylpyridinio-3-carboxylate; Betaine nicotinate; Caffearin; Gynesine; N-Methylnicotinate; Trigenelline; Trigonelline		C01004
88	136.039	TRUE	0.721407	26765.7	0.00104182	C7H7NO2	-H(-)	93	4-Nitrotoluene	1-Methyl-4-nitrobenzene; 4-Nitrotoluene		C14394
88	136.039	TRUE	0.721407	26765.7	0.00104182	C7H7NO2	-H(-)	93	3-Nitrotoluene	3-Nitrotoluene		C19486
88	136.039	TRUE	0.721407	26765.7	0.00104182	C7H7NO2	-H(-)	93	2-Nitrotoluene	2-Nitrotoluene		C19597
89	136.077	TRUE	0.817405	23048.9	0.000100046	C8H11NO	-H(-)	100	Tyramine	2-(p-Hydroxyphenyl)ethylamine; Tyramine		C00483
89	136.077	TRUE	0.817405	23048.9	0.000100046	C8H11NO	-H(-)	100	N,N-Dimethylaniline N-oxide	N,N-Dimethylaniline N-oxide		C01183
89	136.077	TRUE	0.817405	23048.9	0.000100046	C8H11NO	-H(-)	100	Phenylethanolamine	2-Amino-1-phenylethanol; Phenylethanolamine		C02735
89	136.077	TRUE	0.817405	23048.9	0.000100046	C8H11NO	-H(-)	100	1-(p-Hydroxyphenyl)ethylamine	1-(p-Hydroxyphenyl)ethylamine		C03473
89	136.077	TRUE	0.817405	23048.9	0.000100046	C8H11NO	-H(-)	100	4-Hydroxy-2,6-dimethylaniline	3,5-Dimethyl-4-aminophenol; 4-Hydroxy-2,6-dimethylaniline		C16570
89	136.077	TRUE	0.817405	23048.9	0.000100046	C8H11NO	-H(-)	100	Methyridine	Methyridine		C18396
89	136.077	TRUE	0.817405	23048.9	0.000100046	C8H11NO	-H(-)	100	para-Cresidine	p-Cresidine; para-Cresidine		C19216
89	136.077	TRUE	0.817405	23048.9	0.000100046	C8H11NO	-H(-)	100	meta-Cresidine	4-Methoxy-2-methyl-benzenamine; m-Cresidine; meta-Cresidine		C19376
90	139.998	TRUE	0.498988	7483.35	0.000705778	C5H3NO4	-H(-)	100	5-Nitrofurfural	5-Nitro-2-furaldehyde; 5-Nitro-2-furfural; 5-Nitrofurfural		C14281
91	140.072	TRUE	0.44372	13563.8	-0.000313885	C7H11NO2	-H(-)	100	Ethosuximide	Ethosuximide		C07505
91	140.072	TRUE	0.44372	13563.8	-0.000313885	C7H11NO2	-H(-)	100	Hypoglycin	Hypoglycin; Hypoglycin A; Hypoglycine A; L-Hypoglycin		C08287
91	140.072	TRUE	0.44372	13563.8	-0.000313885	C7H11NO2	-H(-)	100	Arecaidine	Arecaidine		C10128
91	140.072	TRUE	0.44372	13563.8	-0.000313885	C7H11NO2	-H(-)	100	Guvacoline	Guvacoline		C16821
92	140.082	TRUE	0.349314	9529.51	0.00107806	C6H11N3O	-H(-)	88	L-Histidinol	L-Histidinol		C00860
93	140.108	TRUE	0.445016	5414.18	0.00024262	C8H15NO	-H(-)	100	Tropine	3alpha-Tropanol; Tropine		C00729
93	140.108	TRUE	0.445016	5414.18	0.00024262	C8H15NO	-H(-)	100	Pseudotropine	Pseudotropine		C02066
93	140.108	TRUE	0.445016	5414.18	0.00024262	C8H15NO	-H(-)	100	Hygrine	(+)-Hygrine; Hygrine		C06179
93	140.108	TRUE	0.445016	5414.18	0.00024262	C8H15NO	-H(-)	100	Pelletierine	Pelletierine		C06182
93	140.108	TRUE	0.445016	5414.18	0.00024262	C8H15NO	-H(-)	100	Physoperuvine	Physoperuvine		C10864
93	140.108	TRUE	0.445016	5414.18	0.00024262	C8H15NO	-H(-)	100	(-)-Hygrine	(-)-Hygrine		C11359
93	140.108	TRUE	0.445016	5414.18	0.00024262	C8H15NO	-H(-)	100	Trachelanthamidine	Trachelanthamidine		C12440
94	141.067	TRUE	0.931258	54000.8	3.3132e-05	C6H10N2O2	-H(-)	100	Ectoine	Ectoine; L-Ectoine		C06231
95	141.091	TRUE	0.381585	18661.8	0.000747059	C8H14O2	-H(-)	100	Cycloheptanecarboxylic acid	Cycloheptanecarboxylic acid; Cycloheptanoic acid		C12104
95	141.091	TRUE	0.381585	18661.8	0.000747059	C8H14O2	-H(-)	100	Cyclohexyl acetate	Cyclohexyl acetate		C12297
95	141.091	TRUE	0.381585	18661.8	0.000747059	C8H14O2	-H(-)	100	2-n-Propyl-4-pentenoic acid	2-n-Propyl-4-pentenoic acid; 4-En-valproic acid; 4-Ene-VPA		C16648
95	141.091	TRUE	0.381585	18661.8	0.000747059	C8H14O2	-H(-)	100	2-n-Propyl-2-pentenoic acid	2-En-valproic acid; 2-Ene-VPA; 2-n-Propyl-2-pentenoic acid		C16653
95	141.091	TRUE	0.381585	18661.8	0.000747059	C8H14O2	-H(-)	100	2-n-Propyl-3-pentenoic acid	2-n-Propyl-3-pentenoic acid; 3-En-valproic acid; 3-Ene-VPA		C16654
95	141.091	TRUE	0.381585	18661.8	0.000747059	C8H14O2	-H(-)	100	Allyl isovalerate	Allyl isovalerate		C19318
95	141.091	TRUE	0.381585	18661.8	0.000747059	C8H14O2	-H(-)	100	(Z)-3-Hexen-1-ol acetate	(3Z)-Hex-3-en-1-yl acetate; (Z)-3-Hexen-1-ol acetate; cis-3-Hexenyl acetate		C19757
96	142.051	TRUE	0.816449	40903.7	9.04856e-05	C6H9NO3	-H(-)	100	2-Hydroxymethylclavam	2-Hydroxymethylclavam		C17357
97	142.087	TRUE	0.806561	11947.3	-9.68907e-05	C7H13NO2	-H(-)	100	(E)-4-(Trimethylammonio)but-2-enoate	(E)-4-(Trimethylammonio)but-2-enoate; Crotono-betaine; Crotonobetaine		C04114
97	142.087	TRUE	0.806561	11947.3	-9.68907e-05	C7H13NO2	-H(-)	100	Stachydrine	Proline betaine; Stachydrine		C10172
98	143.035	TRUE	0.903048	173966	-2.25412e-05	C6H8O4	-H(-)	100	2,3-Dimethylmaleate	2,3-Dimethylmaleate; Dimethylmaleic acid		C00922
98	143.035	TRUE	0.903048	173966	-2.25412e-05	C6H8O4	-H(-)	100	Triacetate	3,5-Dioxo-hexanoic acid; Triacetate		C01757
98	143.035	TRUE	0.903048	173966	-2.25412e-05	C6H8O4	-H(-)	100	Methylitaconate	2-Methylene-3-methylsuccinate; Methylitaconate		C02295
98	143.035	TRUE	0.903048	173966	-2.25412e-05	C6H8O4	-H(-)	100	2-Methyleneglutarate	2-Methyleneglutarate; alpha-Methylene glutarate		C02930
98	143.035	TRUE	0.903048	173966	-2.25412e-05	C6H8O4	-H(-)	100	2-Hydroxy-2-(hydroxymethyl)-2H-pyran-3(6H)-one	2-Hydroxy-2-(hydroxymethyl)-2H-pyran-3(6H)-one; Microthecin		C19821
98	143.035	TRUE	0.903048	173966	-2.25412e-05	C6H8O4	-H(-)	100	1,5-Anhydro-4-deoxy-D-glycero-hex-3-en-2-ulose	1,5-Anhydro-4-deoxy-D-glycero-hex-3-en-2-ulose; Ascopyrone M		C19822
98	143.035	TRUE	0.903048	173966	-2.25412e-05	C6H8O4	-H(-)	100	1,5-Anhydro-4-deoxy-D-glycero-hex-1-en-3-ulose	1,5-Anhydro-4-deoxy-D-glycero-hex-1-en-3-ulose; 5-Hydroxy-2-(hydroxymethyl)-2H-pyran-4(3H)-one; Ascopyrone P		C19826
99	143.071	TRUE	0.618406	26174.6	0.000652255	C7H12O3	-H(-)	100	trans-4-Hydroxycyclohexanecarboxylate	trans-4-Hydroxycyclohexanecarboxylate		C04404
99	143.071	TRUE	0.618406	26174.6	0.000652255	C7H12O3	-H(-)	100	7-Oxoheptanoic acid	7-Ketoheptanoic acid; 7-Oxoheptanoic acid		C16590
100	143.083	TRUE	0.7139	7177.16	-0.000187237	C6H12N2O2	-H(-)	100	4-Amino-1-piperidinecarboxylic acid	4-Amino-1-piperidinecarboxylic acid		C16837
101	143.108	TRUE	0.727564	90825.3	5.06767e-05	C8H16O2	-H(-)	100	Octanoic acid	Caprylic acid; Octanoic acid; Octylic acid		C06423
101	143.108	TRUE	0.727564	90825.3	5.06767e-05	C8H16O2	-H(-)	100	Valproic acid	Valproic acid		C07185
102	144.03	TRUE	0.798474	12735.8	0.000104163	C5H7NO4	-H(-)	100	2-Oxoglutaramate	2-Ketoglutaramate; 2-Oxoglutaramate; 2-Oxoglutaramic acid; alpha-Ketoglutaramate		C00940
102	144.03	TRUE	0.798474	12735.8	0.000104163	C5H7NO4	-H(-)	100	4-Oxoglutaramate	4-Ketoglutaramate; 4-Oxoglutaramate		C05572
103	144.045	TRUE	0.773452	76612	0.000148507	C9H7NO	-H(-)	100	3-Methyleneoxindole	3-Methyleneoxindole		C02796
103	144.045	TRUE	0.773452	76612	0.000148507	C9H7NO	-H(-)	100	Isocarbostyril	1(2H)-Isoquinolinone; Isocarbostyril; Isoquinolin-1(2H)-one		C06324
103	144.045	TRUE	0.773452	76612	0.000148507	C9H7NO	-H(-)	100	Quinolin-2-ol	2-Hydroxyquinoline; 2-Quinolinol; 2-Quinolone; Quinolin-2-ol		C06338
103	144.045	TRUE	0.773452	76612	0.000148507	C9H7NO	-H(-)	100	4-Hydroxyquinoline	4-Hydroxyquinoline; Quinolin-4-ol		C06343
103	144.045	TRUE	0.773452	76612	0.000148507	C9H7NO	-H(-)	100	2(1H)-Quinolinone	2(1H)-Quinolinone; Quinolin-2(1H)-one		C06415
103	144.045	TRUE	0.773452	76612	0.000148507	C9H7NO	-H(-)	100	Indole-3-carboxaldehyde	Indole-3-carbaldehyde; Indole-3-carboxaldehyde		C08493
103	144.045	TRUE	0.773452	76612	0.000148507	C9H7NO	-H(-)	100	8-Hydroxyquinoline	8-Hydroxyquinoline; Oxyquinoline		C19434
104	144.067	TRUE	0.918889	60619.7	-8.28852e-05	C6H11NO3	-H(-)	100	4-Acetamidobutanoate	4-Acetamidobutanoate; N4-Acetylaminobutanoate		C02946
104	144.067	TRUE	0.918889	60619.7	-8.28852e-05	C6H11NO3	-H(-)	100	6-Amino-2-oxohexanoate	2-Oxo-6-aminocaproate; 6-Amino-2-oxohexanoate		C03239
104	144.067	TRUE	0.918889	60619.7	-8.28852e-05	C6H11NO3	-H(-)	100	(S)-5-Amino-3-oxohexanoic acid	(S)-5-Amino-3-oxohexanoate; (S)-5-Amino-3-oxohexanoic acid		C03656
104	144.067	TRUE	0.918889	60619.7	-8.28852e-05	C6H11NO3	-H(-)	100	L-2-Aminoadipate 6-semialdehyde	(S)-2-Amino-6-oxohexanoate; 2-Aminoadipate 6-semialdehyde; Allysine; L-2-Aminoadipate 6-semialdehyde; L-Allysine		C04076
104	144.067	TRUE	0.918889	60619.7	-8.28852e-05	C6H11NO3	-H(-)	100	2-Amino-5-oxohexanoate	2-Amino-5-oxohexanoate		C05825
105	145.03	TRUE	0.616053	5517.91	-0.00010363	C9H6O2	-H(-)	100	Coumarin	1,2-Benzopyrone; 2-Propenoic acid, 3-(2-hydroxyphenyl)-, delta-lactone; 2H-1-Benzopyran-2-one; 5,6-Benzo-2-pyrone; Benzo-alpha-pyrone; Coumarin; Coumarine; Coumarinic anhydride; Cumarin; Rattex; Tonka bean camphor; cis-o-Coumarinic acid lactone; o-Hydroxycinnamic acid lactone		C05851
106	145.04	TRUE	0.612966	11463.4	0.000578467	C8H6N2O	-H(-)	100	1(2H)-Phthalazinone	1(2H)-Phthalazinone; Phthalazin-1-one; Phthalazone		C14473
107	145.05	TRUE	0.819208	40787.1	0.000211862	C6H10O4	-H(-)	100	2-Aceto-2-hydroxybutanoate	2-Aceto-2-hydroxybutanoate		C00659
107	145.05	TRUE	0.819208	40787.1	0.000211862	C6H10O4	-H(-)	100	Mevaldate	Mevaldate; Mevaldic acid		C00772
107	145.05	TRUE	0.819208	40787.1	0.000211862	C6H10O4	-H(-)	100	2-Dehydropantoate	2-Dehydropantoate		C00966
107	145.05	TRUE	0.819208	40787.1	0.000211862	C6H10O4	-H(-)	100	(R)-4-Dehydropantoate	(R)-4-Dehydropantoate		C01053
107	145.05	TRUE	0.819208	40787.1	0.000211862	C6H10O4	-H(-)	100	3-Hydroxy-3-methyl-2-oxopentanoic acid	3-Hydroxy-3-methyl-2-oxopentanoate; 3-Hydroxy-3-methyl-2-oxopentanoic acid		C04237
107	145.05	TRUE	0.819208	40787.1	0.000211862	C6H10O4	-H(-)	100	(S)-2-Aceto-2-hydroxybutanoate	(S)-2-Aceto-2-hydroxybutanoate; (S)-2-Hydroxy-2-ethyl-3-oxobutanoate		C06006
107	145.05	TRUE	0.819208	40787.1	0.000211862	C6H10O4	-H(-)	100	Adipate	Adipate; Adipic acid; Hexan-1,6-dicarboxylate; Hexanedioate		C06104
107	145.05	TRUE	0.819208	40787.1	0.000211862	C6H10O4	-H(-)	100	4-Hydroxy-2-oxohexanoic acid	4-Hydroxy-2-oxohexanoate; 4-Hydroxy-2-oxohexanoic acid		C06762
107	145.05	TRUE	0.819208	40787.1	0.000211862	C6H10O4.	-H(-)	100	Piperazine adipate	Piperazine adipate		C13811
107	145.05	TRUE	0.819208	40787.1	0.000211862	C6H10O4	-H(-)	100	(R)-3-Hydroxy-3-methyl-2-oxopentanoate	(R)-3-Hydroxy-3-methyl-2-oxopentanoate		C14463
107	145.05	TRUE	0.819208	40787.1	0.000211862	C6H10O4	-H(-)	100	3-Hydroxy-5-oxohexanoate	3-Hydroxy-5-oxohexanoate		C16272
108	145.062	TRUE	0.831046	421945	-8.20093e-05	C5H10N2O3	-H(-)	100	L-Glutamine	L-2-Aminoglutaramic acid; L-Glutamine		C00064
108	145.062	TRUE	0.831046	421945	-8.20093e-05	C5H10N2O3	-H(-)	100	Glutamine	2-Aminoglutaramic acid; Glutamine		C00303
108	145.062	TRUE	0.831046	421945	-8.20093e-05	C5H10N2O3	-H(-)	100	D-Glutamine	D-2-Aminoglutaramic acid; D-Glutamine		C00819
108	145.062	TRUE	0.831046	421945	-8.20093e-05	C5H10N2O3	-H(-)	100	3-Ureidoisobutyrate	3-Ureidoisobutyrate		C05100
108	145.062	TRUE	0.831046	421945	-8.20093e-05	C5H10N2O3	-H(-)	100	Isoglutamine	4,5-Diamino-5-oxopentanoic acid; DL-Isoglutamine; Isoglutamine		C16673
109	145.098	TRUE	0.976848	1.35237e+06	3.95137e-05	C6H14N2O2	-H(-)	100	L-Lysine	2,6-Diaminohexanoic acid; L-Lysine; Lysine acid		C00047
109	145.098	TRUE	0.976848	1.35237e+06	3.95137e-05	C6H14N2O2	-H(-)	100	D-Lysine	D-2,6-Diaminohexanoic acid; D-Lysine		C00739
109	145.098	TRUE	0.976848	1.35237e+06	3.95137e-05	C6H14N2O2	-H(-)	100	(3S)-3,6-Diaminohexanoate	(3S)-3,6-Diaminohexanoate; L-beta-Lysine		C01142
109	145.098	TRUE	0.976848	1.35237e+06	3.95137e-05	C6H14N2O2	-H(-)	100	(3S,5S)-3,5-Diaminohexanoate	(3S,5S)-3,5-Diaminocaproate; (3S,5S)-3,5-Diaminohexanoate; L-erythro-3,5-Diaminocaproate; L-erythro-3,5-Diaminohexanoate		C01186
109	145.098	TRUE	0.976848	1.35237e+06	3.95137e-05	C6H14N2O2	-H(-)	100	2,5-Diaminohexanoate	2,5-Diaminohexanoate		C05161
109	145.098	TRUE	0.976848	1.35237e+06	3.95137e-05	C6H14N2O2	-H(-)	100	Lysine	Lysine		C16440
109	145.098	TRUE	0.976848	1.35237e+06	3.95137e-05	C6H14N2O2	-H(-)	100	(2R,3R)-3-Methylornithine	(2R,3R)-3-Methylornithine; (3R)-3-Methyl-D-ornithine		C20277
110	146.024	TRUE	0.184412	35505.1	0.000263287	C8H5NO2	-H(-)	100	Indole-5,6-quinone	Indole-5,6-quinone		C05579
110	146.024	TRUE	0.184412	35505.1	0.000263287	C8H5NO2	-H(-)	100	Isatin	1H-Indole-2,3-dione; Isatin		C11129
111	146.046	TRUE	0.955924	1.80494e+06	-5.65101e-05	C5H9NO4	-H(-)	100	L-Glutamate	Glutamate; L-Glutamate; L-Glutamic acid; L-Glutaminic acid		C00025
111	146.046	TRUE	0.955924	1.80494e+06	-5.65101e-05	C5H9NO4	-H(-)	100	D-Glutamate	D-2-Aminoglutaric acid; D-Glutamate; D-Glutamic acid; D-Glutaminic acid		C00217
111	146.046	TRUE	0.955924	1.80494e+06	-5.65101e-05	C5H9NO4	-H(-)	100	Glutamate	2-Aminoglutaric acid; Glutamate; Glutaminic acid		C00302
111	146.046	TRUE	0.955924	1.80494e+06	-5.65101e-05	C5H9NO4	-H(-)	100	O-Acetyl-L-serine	O-Acetyl-L-serine; O3-Acetyl-L-serine		C00979
111	146.046	TRUE	0.955924	1.80494e+06	-5.65101e-05	C5H9NO4	-H(-)	100	L-threo-3-Methylaspartate	L-threo-3-Methylaspartate		C03618
111	146.046	TRUE	0.955924	1.80494e+06	-5.65101e-05	C5H9NO4	-H(-)	100	N-(Carboxymethyl)-D-alanine	N-(Carboxymethyl)-D-alanine; Strombine		C03790
111	146.046	TRUE	0.955924	1.80494e+06	-5.65101e-05	C5H9NO4	-H(-)	100	3-Aminopentanedioate	3-Aminopentanedioate; 3-Aminopentanedioic acid; Isoglutamate; Isoglutamic acid		C05574
111	146.046	TRUE	0.955924	1.80494e+06	-5.65101e-05	C5H9NO4	-H(-)	100	L-4-Hydroxyglutamate semialdehyde	L-4-Hydroxyglutamate semialdehyde		C05938
111	146.046	TRUE	0.955924	1.80494e+06	-5.65101e-05	C5H9NO4	-H(-)	100	2-Oxo-4-hydroxy-5-aminovalerate	2-Oxo-4-hydroxy-5-aminovalerate		C05941
111	146.046	TRUE	0.955924	1.80494e+06	-5.65101e-05	C5H9NO4	-H(-)	100	N-Methyl-D-aspartic acid	N-Methyl-D-aspartate; N-Methyl-D-aspartic acid; NMDA		C12269
112	147.03	TRUE	0.960977	123178	7.87821e-05	C5H8O5	-H(-)	100	D-Arabinono-1,4-lactone	D-Arabinono-1,4-lactone		C00652
112	147.03	TRUE	0.960977	123178	7.87821e-05	C5H8O5	-H(-)	100	2-Dehydro-3-deoxy-L-arabinonate	2-Dehydro-3-deoxy-L-arabinonate; 2-Dehydro-3-deoxy-L-pentonate		C00684
112	147.03	TRUE	0.960977	123178	7.87821e-05	C5H8O5	-H(-)	100	Citramalate	2-Methylmalic acid; Citramalate; Citramalic acid; alpha-Hydroxypyrotartaric acid		C00815
112	147.03	TRUE	0.960977	123178	7.87821e-05	C5H8O5	-H(-)	100	(R)-2-Hydroxyglutarate	(R)-2-Hydroxyglutarate; (R)-Hydroxyglutarate		C01087
112	147.03	TRUE	0.960977	123178	7.87821e-05	C5H8O5	-H(-)	100	L-Arabinono-1,4-lactone	L-Arabinono-1,4-lactone; L-Arabonolactone		C01114
112	147.03	TRUE	0.960977	123178	7.87821e-05	C5H8O5	-H(-)	100	D-Xylonolactone	D-Xylono-1,5-lactone; D-Xylonolactone		C02266
112	147.03	TRUE	0.960977	123178	7.87821e-05	C5H8O5	-H(-)	100	(R)-2-Methylmalate	(2R)-2-Hydroxy-2-methylbutanedioate; (R)-2-Methylmalate; (R)-2-Methylmalic acid; (R)-Citramalate; (R)-Citramalic acid; (R)-alpha-Hydroxypyrotartaric acid; D-Citramalate; D-Citramalic acid; D-alpha-Hydroxypyrotartaric acid		C02612
112	147.03	TRUE	0.960977	123178	7.87821e-05	C5H8O5	-H(-)	100	(S)-2-Methylmalate	(2S)-2-Hydroxy-2-methylbutanedioate; (S)-2-Hydroxy-2-methylsuccinic acid; (S)-2-Methylmalate; (S)-2-Methylmalic acid; (S)-Citramalate; (S)-Citramalic acid; (S)-alpha-Hydroxypyrotartaric acid; L-Citramalate; L-Citramalic acid; L-alpha-Hydroxypyrotartaric acid		C02614
112	147.03	TRUE	0.960977	123178	7.87821e-05	C5H8O5	-H(-)	100	2-Hydroxyglutarate	2-Hydroxyglutarate; alpha-Hydroxyglutarate		C02630
112	147.03	TRUE	0.960977	123178	7.87821e-05	C5H8O5	-H(-)	100	D-Xylono-1,4-lactone	D-Xylono-1,4-lactone		C02753
112	147.03	TRUE	0.960977	123178	7.87821e-05	C5H8O5	-H(-)	100	L-Xylono-1,4-lactone	L-Xylono-1,4-lactone		C02994
112	147.03	TRUE	0.960977	123178	7.87821e-05	C5H8O5	-H(-)	100	(S)-2-Hydroxyglutarate	(S)-2-Hydroxyglutarate		C03196
112	147.03	TRUE	0.960977	123178	7.87821e-05	C5H8O5	-H(-)	100	2-Dehydro-3-deoxy-D-xylonate	(4S)-4,5-Dihydroxy-2-oxopentanoate; 2-Dehydro-3-deoxy-D-arabinonate; 2-Dehydro-3-deoxy-D-pentonate; 2-Dehydro-3-deoxy-D-xylonate		C03826
112	147.03	TRUE	0.960977	123178	7.87821e-05	C5H8O5	-H(-)	100	L-Arabinono-1,5-lactone	L-Arabinono-1,5-lactone		C05405
112	147.03	TRUE	0.960977	123178	7.87821e-05	C5H8O5	-H(-)	100	L-threo-3-Methylmalate	L-threo-3-Methylmalate		C06029
112	147.03	TRUE	0.960977	123178	7.87821e-05	C5H8O5	-H(-)	100	D-threo-3-Methylmalate	D-threo-3-Methylmalate		C06031
112	147.03	TRUE	0.960977	123178	7.87821e-05	C5H8O5	-H(-)	100	D-erythro-3-Methylmalate	(2R,3S)-3-Methylmalate; D-erythro-3-Methylmalate		C06032
113	147.046	TRUE	0.903958	330207	-0.000380277	C9H8O2	-H(-)	100	trans-Cinnamate	(E)-Cinnamate; trans-Cinnamate; trans-Cinnamic acid		C00423
113	147.046	TRUE	0.903958	330207	-0.000380277	C9H8O2	-H(-)	100	Dihydrocoumarin	3,4-Dihydrocoumarin; Dihydrocoumarin		C02274
113	147.046	TRUE	0.903958	330207	-0.000380277	C9H8O2	-H(-)	100	4-Hydroxycinnamyl aldehyde	4-Hydroxycinnamyl aldehyde; p-Coumaraldehyde		C05608
113	147.046	TRUE	0.903958	330207	-0.000380277	C9H8O2	-H(-)	100	3-Hydroxy-1-indanone	3-Hydroxy-1-indanone		C07720
113	147.046	TRUE	0.903958	330207	-0.000380277	C9H8O2	-H(-)	100	3-Isochromanone	1,4-Dihydro-3H-2-benzopyran-3-one; 3-Isochromanone		C07728
113	147.046	TRUE	0.903958	330207	-0.000380277	C9H8O2	-H(-)	100	Cinnamic acid	Benzeneacrylic acid; Cinnamic acid		C10438
113	147.046	TRUE	0.903958	330207	-0.000380277	C9H8O2	-H(-)	100	Pyruvophenone	1-Phenyl-1,2-propanedione; Pyruvophenone		C17268
114	147.067	TRUE	0.850688	84912.2	-0.000414083	C6H12O4	-H(-)	100	(R)-Mevalonate	(R)-Mevalonate; 3,5-Dihydroxy-3-methylvaleric acid; Mevalonic acid		C00418
114	147.067	TRUE	0.850688	84912.2	-0.000414083	C6H12O4	-H(-)	100	(R)-Pantoate	(R)-Pantoate; Pantoate; Pantoic acid		C00522
114	147.067	TRUE	0.850688	84912.2	-0.000414083	C6H12O4	-H(-)	100	(S)-Mevalonate	(S)-3,5-Dihydroxy-3-methylvaleric acid; (S)-Mevalonate; (S)-Mevalonic acid		C02104
114	147.067	TRUE	0.850688	84912.2	-0.000414083	C6H12O4	-H(-)	100	3,6-Dideoxy-L-galactose	3,6-Dideoxy-L-galactose; 3,6-Dideoxy-L-xylo-hexose; Colitose		C03348
114	147.067	TRUE	0.850688	84912.2	-0.000414083	C6H12O4	-H(-)	100	2,3-Dihydroxy-3-methylpentanoate	2,3-Dihydroxy-3-methylpentanoate; 2,3-Dihydroxy-3-methylvalerate		C04104
114	147.067	TRUE	0.850688	84912.2	-0.000414083	C6H12O4	-H(-)	100	(R)-2,3-Dihydroxy-3-methylpentanoate	(2R,3R)-2,3-Dihydroxy-3-methylpentanoate; (R)-2,3-Dihydroxy-3-methylpentanoate; (R)-2,3-Dihydroxy-3-methylvalerate		C06007
114	147.067	TRUE	0.850688	84912.2	-0.000414083	C6H12O4	-H(-)	100	Abequose	3,6-Deoxy-D-galactose; 3,6-Deoxy-D-xylo-hexose; 3-Deoxy-D-fucose; Abequose		C06471
115	148.044	TRUE	0.920896	200190	-4.05561e-05	C5H11NO2S	-H(-)	100	L-Methionine	L-2-Amino-4methylthiobutyric acid; L-Methionine; Methionine		C00073
115	148.044	TRUE	0.920896	200190	-4.05561e-05	C5H11NO2S	-H(-)	100	D-Methionine	D-2-Amino-4-(methylthio)butyric acid; D-Methionine		C00855
115	148.044	TRUE	0.920896	200190	-4.05561e-05	C5H11NO2S	-H(-)	100	Methionine	2-Amino-4-(methylthio)butyric acid; Methionine		C01733
115	148.044	TRUE	0.920896	200190	-4.05561e-05	C5H11NO2S	-H(-)	100	Penicillamine	Penicillamine		C07418
116	148.062	TRUE	0.899699	25404.7	-0.000760488	C5H11NO4	-H(-)	100	N,N-Dihydroxy-L-valine	N,N-Dihydroxy-L-valine		C20314
117	148.077	TRUE	0.850642	10183.4	0.000123858	C9H11NO	-H(-)	100	D-Cathinone	Cathinone; D-Cathinone		C08301
117	148.077	TRUE	0.850642	10183.4	0.000123858	C9H11NO	-H(-)	100	3-Phenylpropionaldoxim	3-Phenylpropionaldoxim		C17236
118	148.991	TRUE	0.862299	419106	0.000112575	C4H6O4S	-H(-)	100	Thiodiacetic acid	Thiodiacetic acid		C14872
119	149.046	TRUE	0.855485	152102	-1.99803e-05	C5H10O5	-H(-)	100	D-Ribose	D-Ribose		C00121
119	149.046	TRUE	0.855485	152102	-1.99803e-05	C5H10O5	-H(-)	100	D-Xylose	D-Xylose; Wood sugar		C00181
119	149.046	TRUE	0.855485	152102	-1.99803e-05	C5H10O5	-H(-)	100	D-Arabinose	D-Arabinose		C00216
119	149.046	TRUE	0.855485	152102	-1.99803e-05	C5H10O5	-H(-)	100	L-Arabinose	L-Arabinopyranose; L-Arabinose		C00259
119	149.046	TRUE	0.855485	152102	-1.99803e-05	C5H10O5	-H(-)	100	D-Ribulose	D-Arabinoketose; D-Arabinulose; D-Riboketose; D-Ribulose; D-erythro-2-Pentulose		C00309
119	149.046	TRUE	0.855485	152102	-1.99803e-05	C5H10O5	-H(-)	100	D-Xylulose	D-Lyxulose; D-Xylulose; D-threo-Pentulose		C00310
119	149.046	TRUE	0.855485	152102	-1.99803e-05	C5H10O5	-H(-)	100	L-Xylulose	L-Lyxulose; L-Xylulose; L-threo-Pentulose		C00312
119	149.046	TRUE	0.855485	152102	-1.99803e-05	C5H10O5	-H(-)	100	D-Lyxose	D-Lyxose		C00476
119	149.046	TRUE	0.855485	152102	-1.99803e-05	C5H10O5	-H(-)	100	L-Ribulose	L-Arabinoketose; L-Arabinulose; L-Riboketose; L-Ribulose; L-erythro-Pentulose		C00508
119	149.046	TRUE	0.855485	152102	-1.99803e-05	C5H10O5	-H(-)	100	Xylose	Xylose		C01394
119	149.046	TRUE	0.855485	152102	-1.99803e-05	C5H10O5	-H(-)	100	D-Apiose	D-Apiose		C01488
119	149.046	TRUE	0.855485	152102	-1.99803e-05	C5H10O5	-H(-)	100	L-Lyxose	L-Lyxose		C01508
119	149.046	TRUE	0.855485	152102	-1.99803e-05	C5H10O5	-H(-)	100	L-Xylose	L-Xylofuranose; L-Xylose		C01510
119	149.046	TRUE	0.855485	152102	-1.99803e-05	C5H10O5	-H(-)	100	beta-D-Xylose	beta-D-Xylose		C02096
119	149.046	TRUE	0.855485	152102	-1.99803e-05	C5H10O5	-H(-)	100	alpha-D-Lyxose	alpha-D-Lyxose		C02204
119	149.046	TRUE	0.855485	152102	-1.99803e-05	C5H10O5	-H(-)	100	alpha-D-Xylose	alpha-D-Xylose		C02205
119	149.046	TRUE	0.855485	152102	-1.99803e-05	C5H10O5	-H(-)	100	beta-L-Arabinose	beta-L-Arabinose		C02479
119	149.046	TRUE	0.855485	152102	-1.99803e-05	C5H10O5	-H(-)	100	alpha-L-Arabinose	alpha-L-Arabinose		C02604
119	149.046	TRUE	0.855485	152102	-1.99803e-05	C5H10O5	-H(-)	100	Ribulose	Ribulose		C05052
119	149.046	TRUE	0.855485	152102	-1.99803e-05	C5H10O5	-H(-)	100	L-Arabinofuranose	L-Arabinofuranose		C06115
119	149.046	TRUE	0.855485	152102	-1.99803e-05	C5H10O5	-H(-)	100	beta-D-Apiose	beta-D-Apiose		C08346
119	149.046	TRUE	0.855485	152102	-1.99803e-05	C5H10O5	-H(-)	100	beta-D-Ribopyranose	Ribose; beta-D-Ribopyranose		C08353
119	149.046	TRUE	0.855485	152102	-1.99803e-05	C5H10O5	-H(-)	100	alpha-D-Ribulose	alpha-D-Ribulose		C08354
119	149.046	TRUE	0.855485	152102	-1.99803e-05	C5H10O5	-H(-)	100	L-Arabinose	L-Arabinose		C11476
119	149.046	TRUE	0.855485	152102	-1.99803e-05	C5H10O5	-H(-)	100	beta-D-Ribofuranose	beta-D-Ribofuranose		C16639
119	149.046	TRUE	0.855485	152102	-1.99803e-05	C5H10O5	-H(-)	100	beta-L-Arabinofuranose	beta-L-Arabinofuranose		C20569
120	149.061	TRUE	0.85809	29658.7	-0.000469292	C9H10O2	-H(-)	100	Tolylacetate	Tolylacetate; p-Cresyl acetate; p-Tolyacetate		C01963
120	149.061	TRUE	0.85809	29658.7	-0.000469292	C9H10O2	-H(-)	100	4-Coumaryl alcohol	4-Coumaryl alcohol; 4-Hydroxycinnamyl alcohol; p-Coumaryl alcohol		C02646
120	149.061	TRUE	0.85809	29658.7	-0.000469292	C9H10O2	-H(-)	100	Phenylpropanoate	3-Phenyl-propionic acid; 3-Phenylpropanoic acid; 3-Phenylpropionic acid; Phenylpropanoate		C05629
120	149.061	TRUE	0.85809	29658.7	-0.000469292	C9H10O2	-H(-)	100	p-Hydroxypropiophenone	Paroxypropione; p-Hydroxypropiophenone		C13342
120	149.061	TRUE	0.85809	29658.7	-0.000469292	C9H10O2	-H(-)	100	Benzyl acetate	Benzyl acetate		C15513
120	149.061	TRUE	0.85809	29658.7	-0.000469292	C9H10O2	-H(-)	100	4-Hydroxydihydrocinnamaldehyde	3-(p-Hydroxyphenyl)propanal; 4-Hydroxydihydrocinnamaldehyde		C16706
120	149.061	TRUE	0.85809	29658.7	-0.000469292	C9H10O2	-H(-)	100	4-Vinylguaiacol	4-Vinylguaiacol		C17883
120	149.061	TRUE	0.85809	29658.7	-0.000469292	C9H10O2	-H(-)	100	Phenyl glycidyl ether	Phenyl glycidyl ether		C19291
120	149.061	TRUE	0.85809	29658.7	-0.000469292	C9H10O2	-H(-)	100	(2E,4E,6E)-4-Methylocta-2,4,6-trienedial	(2E,4E,6E)-4-Methylocta-2,4,6-trienedial		C20697
121	149.097	TRUE	0.0839173	10979	0.000110051	C10H14O	-H(-)	100	(-)-Carvone	(-)-Carvone; (4R)-Carvone		C01767
121	149.097	TRUE	0.0839173	10979	0.000110051	C10H14O	-H(-)	100	(+)-Sabinone	(+)-Sabinone		C01868
121	149.097	TRUE	0.0839173	10979	0.000110051	C10H14O	-H(-)	100	Piperitenone	Piperitenone		C01951
121	149.097	TRUE	0.0839173	10979	0.000110051	C10H14O	-H(-)	100	Isopiperitenone	Isopiperitenone		C02289
121	149.097	TRUE	0.0839173	10979	0.000110051	C10H14O	-H(-)	100	(-)-Isopiperitenone	(-)-(4R)-Isopiperitenone; (-)-Isopiperitenone		C02485
121	149.097	TRUE	0.0839173	10979	0.000110051	C10H14O	-H(-)	100	Perillyl aldehyde	Perillaldehyde; Perillyl aldehyde		C02576
121	149.097	TRUE	0.0839173	10979	0.000110051	C10H14O	-H(-)	100	p-Cumic alcohol	p-Cumic alcohol		C06576
121	149.097	TRUE	0.0839173	10979	0.000110051	C10H14O	-H(-)	100	Carvacrol	Carvacrol		C09840
121	149.097	TRUE	0.0839173	10979	0.000110051	C10H14O	-H(-)	100	Chrysanthenone	(-)-Chrysanthenone; Chrysanthenone		C09843
121	149.097	TRUE	0.0839173	10979	0.000110051	C10H14O	-H(-)	100	Menthofuran	Menthofuran		C09868
121	149.097	TRUE	0.0839173	10979	0.000110051	C10H14O	-H(-)	100	Pinocarvone	Pinocarvone		C09884
121	149.097	TRUE	0.0839173	10979	0.000110051	C10H14O	-H(-)	100	Thymol	Thymol		C09908
121	149.097	TRUE	0.0839173	10979	0.000110051	C10H14O	-H(-)	100	Umbellulone	(-)-Umbellulone; Umbellulone		C09911
121	149.097	TRUE	0.0839173	10979	0.000110051	C10H14O	-H(-)	100	Verbenone	Verbenone		C09913
121	149.097	TRUE	0.0839173	10979	0.000110051	C10H14O	-H(-)	100	(+)-(S)-Carvone	(+)-(S)-Carvone; (+)-Carvone; Carvol; Carvone		C11383
121	149.097	TRUE	0.0839173	10979	0.000110051	C10H14O	-H(-)	100	(+)-Chrysanthenone	(+)-Chrysanthenone		C11394
121	149.097	TRUE	0.0839173	10979	0.000110051	C10H14O	-H(-)	100	Myrtenal	Myrtenal		C11939
121	149.097	TRUE	0.0839173	10979	0.000110051	C10H14O	-H(-)	100	2-tert-Butylphenol	2-tert-Butylphenol		C14130
121	149.097	TRUE	0.0839173	10979	0.000110051	C10H14O	-H(-)	100	2-sec-Butylphenol	2-(1-Methylpropyl)phenol; 2-sec-Butylphenol		C14138
121	149.097	TRUE	0.0839173	10979	0.000110051	C10H14O	-H(-)	100	4-sec-Butylphenol	1-Hydroxy-4-sec-butylbenzene; 4-(1-Methylpropyl)phenol; 4-sec-Butylphenol		C14139
121	149.097	TRUE	0.0839173	10979	0.000110051	C10H14O	-H(-)	100	3-tert-Butylphenol	3-tert-Butylphenol		C14188
121	149.097	TRUE	0.0839173	10979	0.000110051	C10H14O	-H(-)	100	4-tert-Butylphenol	4-tert-Butylphenol; Butylphen		C14200
121	149.097	TRUE	0.0839173	10979	0.000110051	C10H14O	-H(-)	100	4-n-Butylphenol	4-n-Butylphenol; p-Hydroxybutylbenzene		C14464
121	149.097	TRUE	0.0839173	10979	0.000110051	C10H14O	-H(-)	100	4-Isopropyl-3-methylphenol	4-Isopropyl-3-methylphenol; 4-Isopropyl-m-cresol; o-Cymen-5y-ol		C14741
121	149.097	TRUE	0.0839173	10979	0.000110051	C10H14O	-H(-)	100	Eucarvone	Eucarvone		C16955
121	149.097	TRUE	0.0839173	10979	0.000110051	C10H14O	-H(-)	100	Safranal	Safranal		C17062
121	149.097	TRUE	0.0839173	10979	0.000110051	C10H14O	-H(-)	100	(+)-Menthofuran	(+)-Menthofuran; (R)-Menthofuran		C18025
122	150.042	TRUE	0.878142	168565	9.68557e-05	C5H5N5O	-H(-)	100	Guanine	2-Amino-6-hydroxypurine; Guanine		C00242
123	151.026	TRUE	0.769956	201856	2.90425e-05	C5H4N4O2	-H(-)	100	Xanthine	Xanthine		C00385
123	151.026	TRUE	0.769956	201856	2.90425e-05	C5H4N4O2	-H(-)	100	Alloxanthine	Alloxanthine; Oxipurinol; Oxypurinol		C07599
124	151.061	TRUE	0.897852	69588.9	7.78461e-06	C5H12O5	-H(-)	100	Xylitol	Xylitol		C00379
124	151.061	TRUE	0.897852	69588.9	7.78461e-06	C5H12O5	-H(-)	100	Ribitol	Adonitol; Ribitol		C00474
124	151.061	TRUE	0.897852	69588.9	7.78461e-06	C5H12O5	-H(-)	100	L-Arabitol	L-Arabinitol; L-Arabinol; L-Arabitol; L-Lyxitol		C00532
124	151.061	TRUE	0.897852	69588.9	7.78461e-06	C5H12O5	-H(-)	100	D-Apiitol	3-(Hydroxymethyl)erythritol; D-Apiitol		C01569
124	151.061	TRUE	0.897852	69588.9	7.78461e-06	C5H12O5	-H(-)	100	D-Arabitol	D-Arabinitol; D-Arabinol; D-Arabitol; D-Lyxitol		C01904
125	151.087	TRUE	0.476912	29731.7	0.00022848	C8H12N2O	-H(-)	100	4-(Hydroxylamino)-N,N-dimethylaniline	4-(Dimethylamino)-N-hydroxyaniline; 4-(Hydroxylamino)-N,N-dimethylaniline		C19681
126	152.002	TRUE	0.788694	4352.12	0.000243144	C3H7NO4S	-H(-)	100	3-Sulfino-L-alanine	3-Sulfino-L-alanine; 3-Sulfinoalanine; 3-Sulphino-L-alanine; L-Cysteinesulfinic acid		C00606
127	152.046	TRUE	0.634858	9815.24	0.000835454	C6H7N3O2	-H(-)	100	1,2-Diamino-4-nitrobenzene	1,2-Diamino-4-nitrobenzene		C19384
127	152.046	TRUE	0.634858	9815.24	0.000835454	C6H7N3O2	-H(-)	100	1,4-Diamino-2-nitrobenzene	1,4-Diamino-2-nitrobenzene		C19385
128	152.071	TRUE	0.692416	13871.1	0.000221928	C8H11NO2	-H(-)	100	Dopamine	2-(3,4-Dihydroxyphenyl)ethylamine; 3,4-Dihydroxyphenethylamine; 4-(2-Aminoethyl)-1,2-benzenediol; 4-(2-Aminoethyl)benzene-1,2-diol; Dopamine		C03758
128	152.071	TRUE	0.692416	13871.1	0.000221928	C8H11NO2	-H(-)	100	Octopamine	1-(4-Hydroxyphenyl)-2-aminoethanol; Octopamine; p-Hydroxyphenylethanolamine		C04227
128	152.071	TRUE	0.692416	13871.1	0.000221928	C8H11NO2	-H(-)	100	Vanillylamine	Vanillylamine		C16666
129	152.083	TRUE	0.5773	6519.03	0.000192194	C7H11N3O	-H(-)	100	4-(beta-Acetylaminoethyl)imidazole	4-(beta-Acetylaminoethyl)imidazole; N-Acetylhistamine		C05135
129	152.083	TRUE	0.5773	6519.03	0.000192194	C7H11N3O	-H(-)	100	2,4-Diamino-6-hydroxylaminotoluene	2,4-Diamino-6-hydroxylaminotoluene		C16399
130	152.996	TRUE	0.923608	118136	-0.000176165	C3H7O5P	-H(-)	100	Propanoyl phosphate	Propanoyl phosphate; Propionyl phosphate		C02876
130	152.996	TRUE	0.923608	118136	-0.000176165	C3H7O5P	-H(-)	100	Hydroxyacetone phosphate	Acetol phosphate; Hydroxyacetone phosphate		C03505
130	152.996	TRUE	0.923608	118136	-0.000176165	C3H7O5P	-H(-)	100	Glycerol 1,2-cyclic phosphate	1,3,2-Dioxaphospholane-4-methanol; Glycerol 1,2-cyclic phosphate		C03947
131	154.062	TRUE	0.814507	1.12547e+06	3.9517e-05	C6H9N3O2	-H(-)	100	L-Histidine	(S)-alpha-Amino-1H-imidazole-4-propionic acid; L-Histidine		C00135
131	154.062	TRUE	0.814507	1.12547e+06	3.9517e-05	C6H9N3O2	-H(-)	100	Histidine	Histidine; alpha-Amino-1H-imidazole-4-propionic acid		C00768
131	154.062	TRUE	0.814507	1.12547e+06	3.9517e-05	C6H9N3O2	-H(-)	100	3-(Pyrazol-1-yl)-L-alanine	3-(Pyrazol-1-yl)-L-alanine; beta-Pyrazol-1-ylalanine		C01162
131	154.062	TRUE	0.814507	1.12547e+06	3.9517e-05	C6H9N3O2	-H(-)	100	D-Histidine	(R)-alpha-Amino-1H-imidazole-4-propionic acid; D-Histidine		C06419
132	154.999	TRUE	0.830276	20773.5	-0.000322412	C6H4O5	-H(-)	100	2,5-Furandicarboxylate	2,5-Furandicarboxylate		C20450
133	155.035	TRUE	0.728428	12978.7	7.18718e-05	C7H8O4	-H(-)	100	3-Methyl-cis,cis-hexadienedioate	3-Methyl-cis,cis-hexadienedioate; 3-Methyl-cis,cis-muconate		C04112
133	155.035	TRUE	0.728428	12978.7	7.18718e-05	C7H8O4	-H(-)	100	(2S,3S)-2,3-Dihydro-2,3-dihydroxybenzoate	(2S,3S)-2,3-Dihydro-2,3-dihydroxybenzoate; (2S,3S)-2,3-Dihydroxy-2,3-dihydroxybenzoate		C04171
133	155.035	TRUE	0.728428	12978.7	7.18718e-05	C7H8O4	-H(-)	100	3-Methylmuconolactone	3-Methylmuconolactone; 4-Carboxymethyl-3-methylbut-2-en-1,4-olide		C04558
133	155.035	TRUE	0.728428	12978.7	7.18718e-05	C7H8O4	-H(-)	100	4-Methylmuconolactone	4-Carboxymethyl-4-methylbut-2-en-1,4-olide; 4-Methylmuconolactone		C04559
133	155.035	TRUE	0.728428	12978.7	7.18718e-05	C7H8O4	-H(-)	100	1,6-Dihydroxycyclohexa-2,4-diene-1-carboxylate	1,2-Dihydroxycyclohexa-3,5-diene-1-carboxylate; 1,6-Dihydroxycyclohexa-2,4-diene-1-carboxylate		C04634
133	155.035	TRUE	0.728428	12978.7	7.18718e-05	C7H8O4	-H(-)	100	2-Hydroxy-6-keto-2,4-heptadienoate	2-Hydroxy-6-keto-2,4-heptadienoate; 2-Hydroxy-6-oxo-hept-2,4-dienoate		C06210
133	155.035	TRUE	0.728428	12978.7	7.18718e-05	C7H8O4	-H(-)	100	(1R,6S)-1,6-Dihydroxycyclohexa-2,4-diene-1-carboxylate	(1R,6S)-1,6-Dihydroxycyclohexa-2,4-diene-1-carboxylate; cis-1,2-Dihydroxycyclohexa-3,5-diene-1-carboxylate; cis-1,6-Dihydroxy-2,4-cyclohexadiene-1-carboxylic acid		C06321
133	155.035	TRUE	0.728428	12978.7	7.18718e-05	C7H8O4	-H(-)	100	2-Hydroxy-5-methyl-cis,cis-muconic semialdehyde	(2E,4Z)-2-Hydroxy-5-methyl-6-oxohexa-2,4-dienoate; 2-Hydroxy-5-methyl-cis,cis-muconic semialdehyde		C06760
133	155.035	TRUE	0.728428	12978.7	7.18718e-05	C7H8O4	-H(-)	100	4-Methyl-3-oxoadipate-enol-lactone	4-Methyl-3-oxoadipate-enol-lactone		C18311
133	155.035	TRUE	0.728428	12978.7	7.18718e-05	C7H8O4	-H(-)	100	(4R,5R)-4,5-Dihydroxycyclohexa-1(6),2-diene-1-carboxylate	(3R,4R)-3,4-Dihydroxycyclohexa-1,5-diene-1-carboxylate; (4R,5R)-4,5-Dihydroxycyclohexa-1(6),2-diene-1-carboxylate; DCDC		C20710
134	155.046	TRUE	0.82097	20006.3	-3.46433e-05	C6H8N2O3	-H(-)	100	4-Imidazolone-5-propanoate	4,5-Dihydro-4-oxo-5-imidazolepropanoate; 4-Imidazolone-5-propanoate; 4-Imidazolone-5-propionic acid		C03680
134	155.046	TRUE	0.82097	20006.3	-3.46433e-05	C6H8N2O3	-H(-)	100	(S)-3-(Imidazol-5-yl)lactate	(S)-3-(Imidazol-5-yl)lactate		C03817
134	155.046	TRUE	0.82097	20006.3	-3.46433e-05	C6H8N2O3	-H(-)	100	Imidazole lactate	2-Hydroxy-3-(1H-imidazol-5-yl)-propanoic acid; Imidazole lactate; Imidazole lactic acid		C05568
134	155.046	TRUE	0.82097	20006.3	-3.46433e-05	C6H8N2O3	-H(-)	100	N-Nitrosoguvacine	N-Nitrosoguvacine		C19481
135	155.108	TRUE	0.776272	15245.7	0.00022025	C9H16O2	-H(-)	100	Nonane-4,6-dione	Nonane-4,6-dione		C02445
135	155.108	TRUE	0.776272	15245.7	0.00022025	C9H16O2	-H(-)	100	Chalcogran	Chalcogran		C08471
135	155.108	TRUE	0.776272	15245.7	0.00022025	C9H16O2	-H(-)	100	gamma-Nonalactone	Dihydro-5-pentyl-2(3H)-furanone; delta-n-Amylbutyrolactone; gamma-Nonalactone		C08501
136	156.067	TRUE	0.893084	48187.5	7.63613e-05	C7H11NO3	-H(-)	100	Paramethadione	Paramethadione		C07411
136	156.067	TRUE	0.893084	48187.5	7.63613e-05	C7H11NO3	-H(-)	100	2-Hydroxyethylclavam	2-Hydroxyethylclavam; Hydroxyethylclavam		C17361
136	156.067	TRUE	0.893084	48187.5	7.63613e-05	C7H11NO3	-H(-)	100	Ethadione	Ethadione		C17724
136	156.067	TRUE	0.893084	48187.5	7.63613e-05	C7H11NO3	-H(-)	100	3-Methylcrotonylglycine	3-Methylcrotonylglycine		C20828
137	156.103	TRUE	0.773778	13770.2	0.000158717	C8H15NO2	-H(-)	100	Homostachydrine	Homostachydrine		C08283
137	156.103	TRUE	0.773778	13770.2	0.000158717	C8H15NO2	-H(-)	100	Lentiginosine	Lentiginosine		C10155
137	156.103	TRUE	0.773778	13770.2	0.000158717	C8H15NO2	-H(-)	100	Tranexamic acid	Tranexamic acid		C12535
138	157.05	TRUE	0.577259	17782	0.000736043	C7H10O4	-H(-)	100	2-Isopropylmaleate	2-Isopropylmaleate; beta-Isopropylmaleate		C02631
138	157.05	TRUE	0.577259	17782	0.000736043	C7H10O4	-H(-)	100	(1S,4S)-4-Hydroxy-3-oxocyclohexane-1-carboxylate	(1S,4S)-4-Hydroxy-3-oxocyclohexane-1-carboxylate		C04670
138	157.05	TRUE	0.577259	17782	0.000736043	C7H10O4	-H(-)	100	5-D-(5/6)-5-C-(Hydroxymethyl)-2,6-dihydroxycyclohex-2-en-1-one	5-D-(5/6)-5-C-(Hydroxymethyl)-2,6-dihydroxycyclohex-2-en-1-one; 5D-(5/6)-5-C-(Hydroxymethyl)-2,6-dihydroxy-2-cyclohexen-1-one		C04815
138	157.05	TRUE	0.577259	17782	0.000736043	C7H10O4	-H(-)	100	Dimethyl citraconate	2-Butenedioic acid, 2-methyl-, dimethyl ester, (Z)-; Citraconate de dimethyle; Citraconic acid dimethyl ester; Citraconic acid, dimethyl ester; Dimethyl citraconate; Dimethyl methylmaleate; Methylmaleic acid, dimethyl ester		C05126
139	157.062	TRUE	0.81837	12925.5	-0.000165924	C6H10N2O3	-H(-)	100	4-Methylene-L-glutamine	4-Methylene-L-glutamine		C01109
139	157.062	TRUE	0.81837	12925.5	-0.000165924	C6H10N2O3	-H(-)	100	5-Hydroxyectoine	5-Hydroxyectoine		C16432
140	157.087	TRUE	0.44331	34631.9	0.000330446	C8H14O3	-H(-)	100	Ethyl 3-oxohexanoate	Ethyl 3-oxohexanoate; Ethyl butyrylacetate		C02975
140	157.087	TRUE	0.44331	34631.9	0.000330446	C8H14O3	-H(-)	100	3-Oxovalproic acid	2-n-Propyl-3-oxopentanoic acid; 3-Keto-VPA; 3-Oxovalproic acid		C16652
140	157.087	TRUE	0.44331	34631.9	0.000330446	C8H14O3	-H(-)	100	2-n-Propyl-4-oxopentanoic acid	2-n-Propyl-4-oxopentanoic acid; 4-Keto-VPA; 4-Oxovalproic acid		C16655
141	157.123	TRUE	0.693521	116666	0.00023148	C9H18O2	-H(-)	100	Nonanoic acid	Nonanoate; Nonanoic acid; Pelargonic acid		C01601
142	157.135	TRUE	0.849784	22679.6	-0.000221996	C8H18N2O	-H(-)	100	N-Nitrosodi-n-butylamine	N,N-Dibutylnitrosoamine; N-Nitrosodi-n-butylamine		C19277
143	158.046	TRUE	0.844981	13249.8	-0.000261445	C6H9NO4	-H(-)	100	4-Methylene-L-glutamate	4-Methylene-L-glutamate		C00651
143	158.046	TRUE	0.844981	13249.8	-0.000261445	C6H9NO4	-H(-)	100	N-Methyl-2-oxoglutaramate	N-Methyl-2-oxoglutaramate		C03623
144	158.06	TRUE	0.819248	52667.5	0.00079272	C10H9NO	-H(-)	100	Indole-3-acetaldehyde	2-(Indol-3-yl)acetaldehyde; Indole-3-acetaldehyde; Indoleacetaldehyde		C00637
144	158.06	TRUE	0.819248	52667.5	0.00079272	C10H9NO	-H(-)	100	3-Methyl-quinolin-2-ol	3-Methyl-quinolin-2-ol		C06345
144	158.06	TRUE	0.819248	52667.5	0.00079272	C10H9NO	-H(-)	100	Echinopsine	Echinopsine		C10663
144	158.06	TRUE	0.819248	52667.5	0.00079272	C10H9NO	-H(-)	100	N-Hydroxy-1-aminonaphthalene	1-Naphthylhydroxylamine; N-Hydroxy-1-aminonaphthalene		C14789
145	158.082	TRUE	0.840105	61587.9	0.000219447	C7H13NO3	-H(-)	100	5-Acetamidopentanoate	5-Acetamidopentanoate		C03087
145	158.082	TRUE	0.840105	61587.9	0.000219447	C7H13NO3	-H(-)	100	(-)-Betonicine	(-)-Betonicine; Betonicine		C08269
145	158.082	TRUE	0.840105	61587.9	0.000219447	C7H13NO3	-H(-)	100	3-Hydroxystachydrine	3-Hydroxystachydrine		C10151
145	158.082	TRUE	0.840105	61587.9	0.000219447	C7H13NO3	-H(-)	100	Calystegin A3	Calystegin A3; Calystegine A3		C10850
146	159.03	TRUE	0.911186	52003.6	3.59741e-05	C6H8O5	-H(-)	100	2-Oxoadipate	2-Oxoadipate; 2-Oxoadipic acid		C00322
146	159.03	TRUE	0.911186	52003.6	3.59741e-05	C6H8O5	-H(-)	100	3-Oxoadipate	3-Keto-adipate; 3-Oxoadipate; 3-Oxoadipic acid		C00846
146	159.03	TRUE	0.911186	52003.6	3.59741e-05	C6H8O5	-H(-)	100	3D-(3,5/4)-Trihydroxycyclohexane-1,2-dione	(3R,4S,5R)-3,4,5-Trihydroxy-1,2-cyclohexanedione; 3,5/4-Trihydroxycyclohexa-1,2-dione; 3D-(3,5/4)-Trihydroxycyclohexane-1,2-dione; D-2,3-Diketo-4-deoxy-epi-inositol		C04287
146	159.03	TRUE	0.911186	52003.6	3.59741e-05	C6H8O5	-H(-)	100	D-2,3-Diketo 4-deoxy-epi-inositol	D-2,3-Diketo 4-deoxy-epi-inositol; DKDI		C06891
146	159.03	TRUE	0.911186	52003.6	3.59741e-05	C6H8O5	-H(-)	100	2-Formylglutarate	2-Formylglutarate		C16159
146	159.03	TRUE	0.911186	52003.6	3.59741e-05	C6H8O5	-H(-)	100	2,4-Diketo-3-deoxy-L-fuconate	2,4-Diketo-3-deoxy-L-fuconate		C20781
147	159.066	TRUE	0.710294	20117.2	0.000350883	C7H12O4	-H(-)	100	Pimelate	6-Carboxyhexanoate; Heptanedioic acid; Pimelate; Pimelic acid		C02656
147	159.066	TRUE	0.710294	20117.2	0.000350883	C7H12O4	-H(-)	100	(1S,3R,4S)-3,4-Dihydroxycyclohexane-1-carboxylate	(1S,3R,4S)-3,4-Dihydroxycyclohexane-1-carboxylate		C04687
147	159.066	TRUE	0.710294	20117.2	0.000350883	C7H12O4	-H(-)	100	2-Propylsuccinic acid	2-PSA; 2-Propylsuccinic acid		C16657
148	159.077	TRUE	0.887339	52261	8.23397e-06	C6H12N2O3	-H(-)	100	D-Alanyl-D-alanine	D-Ala-D-Ala; D-Alanyl-D-alanine		C00993
148	159.077	TRUE	0.887339	52261	8.23397e-06	C6H12N2O3	-H(-)	100	N5-Methyl-L-glutamine	N5-Methyl-L-glutamine		C03153
148	159.077	TRUE	0.887339	52261	8.23397e-06	C6H12N2O3	-H(-)	100	N(gamma)-Acetyldiaminobutyrate	N(gamma)-Acetyldiaminobutyrate; N4-Acetyl-L-2,4-diaminobutanoate; N4-Acetyl-L-2,4-diaminobutyrate		C06442
148	159.077	TRUE	0.887339	52261	8.23397e-06	C6H12N2O3	-H(-)	100	Daminozide	Daminozide		C10996
148	159.077	TRUE	0.887339	52261	8.23397e-06	C6H12N2O3	-H(-)	100	N-alpha-Acetyl-L-2,4-diaminobutyrate	N-alpha-Acetyl-L-2,4-diaminobutyrate		C19929
149	159.103	TRUE	0.779617	26901.1	0.000136168	C8H16O3	-H(-)	100	Ethyl (R)-3-hydroxyhexanoate	Ethyl (R)-3-hydroxyhexanoate		C03864
149	159.103	TRUE	0.779617	26901.1	0.000136168	C8H16O3	-H(-)	100	Ethyl (S)-3-hydroxyhexanoate	Ethyl (S)-3-hydroxyhexanoate		C03865
149	159.103	TRUE	0.779617	26901.1	0.000136168	C8H16O3	-H(-)	100	4-Hydroxyvalproic acid	2-n-Propyl-4-hydroxypentanoic acid; 4-Hydroxyvalproic acid; 4-OH-VPA		C16649
149	159.103	TRUE	0.779617	26901.1	0.000136168	C8H16O3	-H(-)	100	5-Hydroxyvalproic acid	2-n-Propyl-5-hydroxypentanoic acid; 5-Hydroxyvalproic acid; 5-OH-VPA		C16650
149	159.103	TRUE	0.779617	26901.1	0.000136168	C8H16O3	-H(-)	100	3-Hydroxyvalproic acid	2-n-Propyl-3-hydroxypentanoic acid; 3-Hydroxyvalproic acid; 3-OH-VPA		C16651
149	159.103	TRUE	0.779617	26901.1	0.000136168	C8H16O3	-H(-)	100	Rengyol	Rengyol		C17527
149	159.103	TRUE	0.779617	26901.1	0.000136168	C8H16O3	-H(-)	100	3-Hydroxyoctanoate	3-Hydroxyoctanoate; 3-Hydroxyoctanoic acid		C20793
150	160.04	TRUE	0.756674	22000.9	0.000787658	C9H7NO2	-H(-)	100	4,8-Dihydroxyquinoline	4,8-Dihydroxyquinoline; Quinoline-4,8-diol		C05637
150	160.04	TRUE	0.756674	22000.9	0.000787658	C9H7NO2	-H(-)	100	4,6-Dihydroxyquinoline	4,6-Dihydroxyquinoline; Quinoline-4,6-diol		C05639
150	160.04	TRUE	0.756674	22000.9	0.000787658	C9H7NO2	-H(-)	100	Quinoline-3,4-diol	3,4-Dihydroxyquinoline; Quinoline-3,4-diol		C06330
150	160.04	TRUE	0.756674	22000.9	0.000787658	C9H7NO2	-H(-)	100	Quinolin-2,8-diol	Quinolin-2,8-diol		C06342
150	160.04	TRUE	0.756674	22000.9	0.000787658	C9H7NO2	-H(-)	100	3-Hydroxy-1H-quinolin-4-one	3-Hydroxy-1H-quinolin-4-one		C11503
150	160.04	TRUE	0.756674	22000.9	0.000787658	C9H7NO2	-H(-)	100	4-Hydroxy-2-quinolone	2,4-Dihydroxyquinoline; 4-Hydroxy-2(1H)-quinolone; 4-Hydroxy-2-quinolone		C16716
150	160.04	TRUE	0.756674	22000.9	0.000787658	C9H7NO2	-H(-)	100	Indole-3-carboxylate	Indole-3-carboxylate; Indole-3-carboxylic acid		C19837
151	160.061	TRUE	0.887888	92589.9	0.000113179	C6H11NO4	-H(-)	100	L-2-Aminoadipate	L-2-Aminoadipate; L-2-Aminoadipic acid; L-2-Aminohexanedioate; L-alpha-Aminoadipate; L-alpha-Aminoadipic acid		C00956
151	160.061	TRUE	0.887888	92589.9	0.000113179	C6H11NO4	-H(-)	100	N-Methyl-L-glutamate	N-Methyl-L-glutamate; N-Methyl-L-glutamic acid		C01046
151	160.061	TRUE	0.887888	92589.9	0.000113179	C6H11NO4	-H(-)	100	O-Acetyl-L-homoserine	O-Acetyl-L-homoserine; O-Acetylhomoserine		C01077
151	160.061	TRUE	0.887888	92589.9	0.000113179	C6H11NO4	-H(-)	100	beta-Alanopine	N-(D-1-Carboxyethyl)-beta-alanine; beta-Alanopine		C02207
151	160.061	TRUE	0.887888	92589.9	0.000113179	C6H11NO4	-H(-)	100	Alanopine	2,2'-Iminodipropanoate; Alanopine; meso-N-(1-Carboxyethyl)-alanine		C03210
151	160.061	TRUE	0.887888	92589.9	0.000113179	C6H11NO4	-H(-)	100	L-Glutamate methylester	L-Glutamate methylester		C05016
151	160.061	TRUE	0.887888	92589.9	0.000113179	C6H11NO4	-H(-)	100	4-Methyl-L-glutamate	4-Methyl-L-glutamate		C06234
151	160.061	TRUE	0.887888	92589.9	0.000113179	C6H11NO4	-H(-)	100	3-Amino-2,3-dideoxy-scyllo-inosose	2-Deoxy-3-keto-scyllo-inosamine; 3-Amino-2,3-dideoxy-scyllo-inosose		C17581
151	160.061	TRUE	0.887888	92589.9	0.000113179	C6H11NO4	-H(-)	100	D-Alanyl-(R)-lactate	(2R)-2-(D-Alanyloxy)propanoic acid; (R)-2-[(R)-2-Aminopropanoyloxy]propanoic acid; D-Alanyl-(R)-lactate; D-Alanyl-D-lactate		C19694
152	161.045	TRUE	0.923616	364064	9.29007e-05	C6H10O5	-H(-)	100	Lichenin	Lichenan; Lichenin		C00478
152	161.045	TRUE	0.923616	364064	9.29007e-05	C6H10O5	-H(-)	100	(R)-3,3-Dimethylmalate	(R)-3,3-Dimethylmalate		C01088
152	161.045	TRUE	0.923616	364064	9.29007e-05	C6H10O5	-H(-)	100	3-Ethylmalate	3-Ethylmalate		C01989
152	161.045	TRUE	0.923616	364064	9.29007e-05	C6H10O5	-H(-)	100	2-Hydroxyadipate	2-Hydroxyadipate; 2-Hydroxyadipic acid		C02360
152	161.045	TRUE	0.923616	364064	9.29007e-05	C6H10O5	-H(-)	100	(R)-2-Ethylmalate	(R)-2-Ethylmalate		C02488
152	161.045	TRUE	0.923616	364064	9.29007e-05	C6H10O5	-H(-)	100	L-Rhamnono-1,4-lactone	L-Rhamno-1,4-lactone; L-Rhamnono-1,4-lactone		C02991
152	161.045	TRUE	0.923616	364064	9.29007e-05	C6H10O5	-H(-)	100	(2R,3S)-2,3-Dimethylmalate	(2R,3S)-2,3-Dimethylmalate		C03652
152	161.045	TRUE	0.923616	364064	9.29007e-05	C6H10O5	-H(-)	100	3-Hydroxy-3-methylglutarate	3-Hydorxy-3-methylglutaric acid; 3-Hydroxy-3-methylglutarate; 3-Hydroxy-3-methylpentanedioic acid; Dicrotalic acid; Meglutol; beta-Hydroxy-beta-methylglutaric acid		C03761
152	161.045	TRUE	0.923616	364064	9.29007e-05	C6H10O5	-H(-)	100	2-Dehydro-3-deoxy-L-fuconate	2-Dehydro-3-deoxy-L-fuconate		C03827
152	161.045	TRUE	0.923616	364064	9.29007e-05	C6H10O5	-H(-)	100	2-Dehydro-3-deoxy-L-rhamnonate	2-Dehydro-3-deoxy-L-rhamnonate		C03979
152	161.045	TRUE	0.923616	364064	9.29007e-05	C6H10O5	-H(-)	100	D-Fucono-1,4-lactone	D-Fucono-1,4-lactone		C06158
152	161.045	TRUE	0.923616	364064	9.29007e-05	C6H10O5	-H(-)	100	2-Dehydro-3-deoxy-D-fuconate	2-Dehydro-3-deoxy-D-fuconate		C06159
152	161.045	TRUE	0.923616	364064	9.29007e-05	C6H10O5	-H(-)	100	3,6-Anhydrogalactose	3,6-Anhydro-D-galactose; 3,6-Anhydrogalactose		C06474
152	161.045	TRUE	0.923616	364064	9.29007e-05	C6H10O5	-H(-)	100	3,6-Anhydroglucose	3,6-Anhydro-D-glucose; 3,6-Anhydroglucose		C06478
152	161.045	TRUE	0.923616	364064	9.29007e-05	C6H10O5	-H(-)	100	1,5-Anhydro-D-fructose	1,5-Anhydro-D-fructose		C06485
152	161.045	TRUE	0.923616	364064	9.29007e-05	C6H10O5	-H(-)	100	Diethyl pyrocarbonate	Diethyl pyrocarbonate		C11592
152	161.045	TRUE	0.923616	364064	9.29007e-05	C6H10O5	-H(-)	100	(S)-2-(Hydroxymethyl)glutarate	(S)-2-(Hydroxymethyl)glutarate		C16390
152	161.045	TRUE	0.923616	364064	9.29007e-05	C6H10O5	-H(-)	100	2-Deoxy-scyllo-inosose	2-Deoxy-L-scyllo-inosose; 2-Deoxy-scyllo-inosose; 2-Deoxyinosose		C17209
152	161.045	TRUE	0.923616	364064	9.29007e-05	C6H10O5	-H(-)	100	L-Fucono-1,5-lactone	L-Fucono-1,5-lactone		C18028
153	161.093	TRUE	0.934722	96411.3	9.66623e-05	C6H14N2O3	-H(-)	100	N6-Hydroxy-L-lysine	N6-Hydroxy-L-lysine		C01028
153	161.093	TRUE	0.934722	96411.3	9.66623e-05	C6H14N2O3	-H(-)	100	2-Deoxystreptamine	2-Deoxystreptamine		C02627
153	161.093	TRUE	0.934722	96411.3	9.66623e-05	C6H14N2O3	-H(-)	100	L-Hydroxylysine	(5R)-5-Hydroxy-L-lysine; 5-Hydroxy-L-lysine; L-Hydroxylysine; L-erythro-5-Hydroxylysine		C16741
153	161.093	TRUE	0.934722	96411.3	9.66623e-05	C6H14N2O3	-H(-)	100	allo-Hydroxy-L-lysine	Allohydroxy-L-lysine; allo-Hydroxy-L-lysine		C16742
154	161.969	TRUE	0.521458	5208.51	-0.000105441	C4H5NO2S2	-H(-)	100	2-Thiophenesulfonamide	2-Thiophenesulfonamide		C14764
155	162.056	TRUE	0.798949	21609.4	0.000141788	C9H9NO2	-H(-)	100	3-Methyldioxyindole	3-Hydroxy-3-methyloxindole; 3-Methyldioxyindole		C05834
155	162.056	TRUE	0.798949	21609.4	0.000141788	C9H9NO2	-H(-)	100	4-Oxo-1-(3-pyridyl)-1-butanone	3-Succinoylsemialdehyde-pyridine; 4-Oxo-1-(3-pyridyl)-1-butanone; 4-Oxo-4-(pyridin-3-yl)butanal; gamma-Oxo-3-pyridinebutanal		C19567
156	162.077	TRUE	0.766782	6456.6	5.04397e-05	C6H13NO4	-H(-)	100	Deoxymannojirimycin	DMJ; Deoxymannojirimycin		C10141
156	162.077	TRUE	0.766782	6456.6	5.04397e-05	C6H13NO4	-H(-)	100	DMDP	2,5-Dihydroxymethyl-3,4-dihydroxypyrrolidine; DMDP		C10143
156	162.077	TRUE	0.766782	6456.6	5.04397e-05	C6H13NO4	-H(-)	100	D-Fucosamine	2-Amino-2,6-dideoxy-D-galactose; D-Fucosamine		C15478
156	162.077	TRUE	0.766782	6456.6	5.04397e-05	C6H13NO4	-H(-)	100	D-Quinovosamine	2-Amino-2,6-dideoxy-D-glucose; D-Quinovosamine		C15479
156	162.077	TRUE	0.766782	6456.6	5.04397e-05	C6H13NO4	-H(-)	100	Deoxynojirimycin	Deoxynojirimycin; Moranolin		C16843
156	162.077	TRUE	0.766782	6456.6	5.04397e-05	C6H13NO4	-H(-)	100	2-Deoxy-scyllo-inosamine	2-Deoxy-scyllo-inosamine		C17580
156	162.077	TRUE	0.766782	6456.6	5.04397e-05	C6H13NO4	-H(-)	100	N,N-Dihydroxy-L-isoleucine	N,N-Dihydroxy-L-isoleucine		C20311
157	163.061	TRUE	0.855519	156310	0.00041248	C6H12O5	-H(-)	100	L-Rhamnose	6-Deoxy-L-mannose; L-Mannomethylose; L-Rhamnopyranose; L-Rhamnose		C00507
157	163.061	TRUE	0.855519	156310	0.00041248	C6H12O5	-H(-)	100	2-Deoxy-D-glucose	2-Deoxy-D-arabino-hexose; 2-Deoxy-D-glucose; D-arabino-2-Deoxyhexose		C00586
157	163.061	TRUE	0.855519	156310	0.00041248	C6H12O5	-H(-)	100	L-Rhamnulose	6-Deoxy-L-fructose; L-Rhamnulose		C00861
157	163.061	TRUE	0.855519	156310	0.00041248	C6H12O5	-H(-)	100	6-Deoxy-D-galactose	6-Deoxy-D-galactose; D-Fucose		C01018
157	163.061	TRUE	0.855519	156310	0.00041248	C6H12O5	-H(-)	100	6-Deoxy-L-galactose	6-Deoxy-L-galactose; L-Fucose		C01019
157	163.061	TRUE	0.855519	156310	0.00041248	C6H12O5	-H(-)	100	D-Rhamnose	6-Deoxy-D-mannose; D-Mannomethylose; D-Rhamnose		C01684
157	163.061	TRUE	0.855519	156310	0.00041248	C6H12O5	-H(-)	100	L-Fuculose	6-Deoxy-L-tagatose; L-Fuculose		C01721
157	163.061	TRUE	0.855519	156310	0.00041248	C6H12O5	-H(-)	100	beta-D-Fucose	beta-D-Fucose		C02095
157	163.061	TRUE	0.855519	156310	0.00041248	C6H12O5	-H(-)	100	beta-L-Rhamnose	beta-6-Deoxy-L-mannose; beta-L-Mannomethylose; beta-L-Rhamnose		C02338
157	163.061	TRUE	0.855519	156310	0.00041248	C6H12O5	-H(-)	100	L-Rhamnofuranose	L-Rhamnofuranose		C02431
157	163.061	TRUE	0.855519	156310	0.00041248	C6H12O5	-H(-)	100	alpha-L-Rhamnose	alpha-6-Deoxy-L-mannose; alpha-L-Mannomethylose; alpha-L-Rhamnose		C02476
157	163.061	TRUE	0.855519	156310	0.00041248	C6H12O5	-H(-)	100	6-Deoxy-D-glucose	6-Deoxy-D-glucose; D-Chinovose; D-Epifucose; D-Glucomethylose; D-Quinovose; Isorhamnose; Isorhodeose		C02522
157	163.061	TRUE	0.855519	156310	0.00041248	C6H12O5	-H(-)	100	2-Deoxy-D-galactose	2-Deoxy-D-galactose		C02781
157	163.061	TRUE	0.855519	156310	0.00041248	C6H12O5	-H(-)	100	1,5-Anhydro-D-glucitol	1,5-Anhydro-D-glucitol; 1,5-Anhydro-D-sorbitol; 1,5-Anhydroglucitol		C07326
157	163.061	TRUE	0.855519	156310	0.00041248	C6H12O5	-H(-)	100	(+)-Quercitol	(+)-Quercitol; d-Quercitol		C08258
157	163.061	TRUE	0.855519	156310	0.00041248	C6H12O5	-H(-)	100	(-)-Viburnitol	(-)-Viburnitol		C08259
157	163.061	TRUE	0.855519	156310	0.00041248	C6H12O5	-H(-)	100	Quinovose	Quinovose; alpha-D-Quinovopyranose		C08352
157	163.061	TRUE	0.855519	156310	0.00041248	C6H12O5	-H(-)	100	1,5-Anhydro-D-mannitol	1,5-Anhydro-D-mannitol		C16538
157	163.061	TRUE	0.855519	156310	0.00041248	C6H12O5	-H(-)	100	alpha-L-Fucopyranose	alpha-L-Fucopyranose; alpha-L-Fucose		C20835
157	163.061	TRUE	0.855519	156310	0.00041248	C6H12O5	-H(-)	100	beta-L-Fucopyranose	beta-L-Fucopyranose; beta-L-Fucose		C20836
158	163.076	TRUE	0.67314	30593.5	0.000141104	C10H12O2	-H(-)	100	p-Cumate	p-Cumate		C06578
158	163.076	TRUE	0.67314	30593.5	0.000141104	C10H12O2	-H(-)	100	Evodone	Evodone		C09858
158	163.076	TRUE	0.67314	30593.5	0.000141104	C10H12O2	-H(-)	100	beta-Thujaplicin	4-Isopropyltropolone; Hinokitiol; beta-Thujaplicin		C09904
158	163.076	TRUE	0.67314	30593.5	0.000141104	C10H12O2	-H(-)	100	gamma-Thujaplicin	5-Isopropyltropolone; gamma-Thujaplicin		C09905
158	163.076	TRUE	0.67314	30593.5	0.000141104	C10H12O2	-H(-)	100	Eugenol	Eugenol		C10453
158	163.076	TRUE	0.67314	30593.5	0.000141104	C10H12O2	-H(-)	100	Isoeugenol	Isoeugenol		C10469
158	163.076	TRUE	0.67314	30593.5	0.000141104	C10H12O2	-H(-)	100	Phenethyl acetate	2-Phenylethyl acetate; Phenethyl acetate		C12303
158	163.076	TRUE	0.67314	30593.5	0.000141104	C10H12O2	-H(-)	100	Dihydrosafrole	1,2-(Methylenedioxy)-4-propylbenzene; Dihydrosafrole		C19229
158	163.076	TRUE	0.67314	30593.5	0.000141104	C10H12O2	-H(-)	100	(2E,4E,6E)-2,6-Dimethylocta-2,4,6-trienedial	(2E,4E,6E)-2,6-Dimethylocta-2,4,6-trienedial		C19729
159	164.058	TRUE	0.851923	23756.4	0.000219262	C6H7N5O	-H(-)	100	3-Methylguanine	2-Amino-3,7-dihydro-3-methyl-6H-purin-6-one; 3-Methylguanine		C02230
159	164.058	TRUE	0.851923	23756.4	0.000219262	C6H7N5O	-H(-)	100	7-Methylguanine	7-Methylguanine		C02242
160	164.072	TRUE	0.917555	2.85104e+06	0.000158574	C9H11NO2	-H(-)	100	L-Phenylalanine	(S)-alpha-Amino-beta-phenylpropionic acid; L-Phenylalanine		C00079
160	164.072	TRUE	0.917555	2.85104e+06	0.000158574	C9H11NO2	-H(-)	100	Phenylalanine	Phenylalanine; alpha-Amino-beta-phenylpropionic acid		C02057
160	164.072	TRUE	0.917555	2.85104e+06	0.000158574	C9H11NO2	-H(-)	100	D-Phenylalanine	D-Phenylalanine; D-alpha-Amino-beta-phenylpropionic acid		C02265
160	164.072	TRUE	0.917555	2.85104e+06	0.000158574	C9H11NO2	-H(-)	100	Benzocaine	Benzocaine; Ethyl aminobenzoate		C07527
160	164.072	TRUE	0.917555	2.85104e+06	0.000158574	C9H11NO2	-H(-)	100	Tricaine	3-Aminobenzoic acid; Tricaine; m-Aminobenzoate		C18090
160	164.072	TRUE	0.917555	2.85104e+06	0.000158574	C9H11NO2	-H(-)	100	Metolcarb	MTMC; Metolcarb; Tsumacide		C18747
160	164.072	TRUE	0.917555	2.85104e+06	0.000158574	C9H11NO2	-H(-)	100	4-Hydroxy-1-(3-pyridinyl)-1-butanone	4-Hydroxy-1-(3-pyridinyl)-1-butanone		C19565
160	164.072	TRUE	0.917555	2.85104e+06	0.000158574	C9H11NO2	-H(-)	100	5-(3-Pyridyl)-2-hydroxytetrahydrofuran	5-(3-Pyridyl)-2-hydroxytetrahydrofuran		C19578
160	164.072	TRUE	0.917555	2.85104e+06	0.000158574	C9H11NO2	-H(-)	100	L-beta-Phenylalanine	(R)-3-Amino-3-phenylpropanoate; L-beta-Phenylalanine		C20487
160	164.072	TRUE	0.917555	2.85104e+06	0.000158574	C9H11NO2	-H(-)	100	D-beta-Phenylalanine	(S)-3-Amino-3-phenylpropanoate; D-beta-Phenylalanine		C20488
161	165.04	TRUE	0.885511	220105	0.000152325	C5H10O6	-H(-)	100	D-Xylonate	D-Xylonate		C00502
161	165.04	TRUE	0.885511	220105	0.000152325	C5H10O6	-H(-)	100	L-Arabinonate	L-Arabinonate		C00545
161	165.04	TRUE	0.885511	220105	0.000152325	C5H10O6	-H(-)	100	D-Arabinonate	D-Arabinonate; D-Arabinonic acid		C00878
161	165.04	TRUE	0.885511	220105	0.000152325	C5H10O6	-H(-)	100	D-Ribonate	D-Ribonate; D-Ribonic acid		C01685
161	165.04	TRUE	0.885511	220105	0.000152325	C5H10O6	-H(-)	100	L-Xylonate	L-Xylonate; L-Xylonic acid		C05411
161	165.04	TRUE	0.885511	220105	0.000152325	C5H10O6	-H(-)	100	L-Lyxonate	L-Lyxonate; L-Lyxonic acid		C05412
162	165.056	TRUE	0.842736	1.43172e+06	0.000139902	C9H10O3	-H(-)	100	3-(2-Hydroxyphenyl)propanoate	2-Hydroxyphenylpropanoate; 3-(2-Hydroxyphenyl)propanoate; 3-(2-Hydroxyphenyl)propionate; 3-(2-Hydroxyphenyl)propionic acid; Melilotate		C01198
162	165.056	TRUE	0.842736	1.43172e+06	0.000139902	C9H10O3	-H(-)	100	Tropate	Tropate; Tropic acid; alpha-(Hydroxymethyl)phenylacetic acid		C01456
162	165.056	TRUE	0.842736	1.43172e+06	0.000139902	C9H10O3	-H(-)	100	Phloretate	3-(4-Hydroxyphenyl)propionic acid; Phloretate; Phloretic acid		C01744
162	165.056	TRUE	0.842736	1.43172e+06	0.000139902	C9H10O3	-H(-)	100	Veratraldehyde	3,4-Dimethoxybenzaldehyde; Veratraldehyde; Veratric aldehyde		C02201
162	165.056	TRUE	0.842736	1.43172e+06	0.000139902	C9H10O3	-H(-)	100	3-Ethoxybenzoate	3-Ethoxybenzoate; 3-Ethoxybenzoic acid		C02363
162	165.056	TRUE	0.842736	1.43172e+06	0.000139902	C9H10O3	-H(-)	100	4-Hydroxyhydratropate	4-Hydroxyhydratropate		C03080
162	165.056	TRUE	0.842736	1.43172e+06	0.000139902	C9H10O3	-H(-)	100	3-Methoxy-4-hydroxyphenylacetaldehyde	(4-Hydroxy-3-methoxyphenyl)acetaldehyde; 3-Methoxy-4-hydroxyphenylacetaldehyde; Homovanillin		C05581
162	165.056	TRUE	0.842736	1.43172e+06	0.000139902	C9H10O3	-H(-)	100	Phenyllactate	(R)-Phenyllactate; Phenyllactate		C05607
162	165.056	TRUE	0.842736	1.43172e+06	0.000139902	C9H10O3	-H(-)	100	Paeonol	Paeonol		C10712
162	165.056	TRUE	0.842736	1.43172e+06	0.000139902	C9H10O3	-H(-)	100	Apocynin	Acetovanillone; Apocynin		C11380
162	165.056	TRUE	0.842736	1.43172e+06	0.000139902	C9H10O3	-H(-)	100	3-(3-Hydroxyphenyl)propanoic acid	3-(3-Hydroxyphenyl)propanoate; 3-(3-Hydroxyphenyl)propanoic acid; 3-Hydroxyphenylpropanoate; Dihydro-3-coumaric acid		C11457
162	165.056	TRUE	0.842736	1.43172e+06	0.000139902	C9H10O3	-H(-)	100	Caffeyl alcohol	Caffeyl alcohol		C12206
163	166.051	TRUE	0.76541	24379.7	0.000387708	C8H9NO3	-H(-)	100	Pyridoxal	Pyridoxal		C00250
163	166.051	TRUE	0.76541	24379.7	0.000387708	C8H9NO3	-H(-)	100	D-4-Hydroxyphenylglycine	(alphaR)-alpha-Amino-4-hydroxybenzeneacetic acid; D-4-Hydroxyphenylglycine		C03493
163	166.051	TRUE	0.76541	24379.7	0.000387708	C8H9NO3	-H(-)	100	3-Hydroxy-4-methylanthranilate	3-Hydroxy-4-methylanthranilate		C03986
163	166.051	TRUE	0.76541	24379.7	0.000387708	C8H9NO3	-H(-)	100	3-Methoxyanthranilate	3-Methoxyanthranilate; 3-Methoxyanthranilic acid		C05831
163	166.051	TRUE	0.76541	24379.7	0.000387708	C8H9NO3	-H(-)	100	Isopyridoxal	Isopyridoxal		C06051
163	166.051	TRUE	0.76541	24379.7	0.000387708	C8H9NO3	-H(-)	100	L-4-Hydroxyphenylglycine	L-4-Hydroxyphenylglycine		C12323
163	166.051	TRUE	0.76541	24379.7	0.000387708	C8H9NO3	-H(-)	100	p-Aminosalicylic acid methyl ester	p-Aminosalicylic acid methyl ester		C14170
163	166.051	TRUE	0.76541	24379.7	0.000387708	C8H9NO3	-H(-)	100	Orthoform	Orthocaine; Orthoform		C14171
163	166.051	TRUE	0.76541	24379.7	0.000387708	C8H9NO3	-H(-)	100	C20821	C20821; Carbapenem biosynthesis intermediate 6		C20821
164	166.074	TRUE	0.892226	31799.5	-0.000574013	C6H9N5O	-H(-)	100	N-Cyclopropylammeline	2-Hydroxy-4-amino-6-(cyclopropylamino)-1,3,5-triazine; N-Cyclopropylammeline		C14148
165	166.975	TRUE	0.776482	5234.39	0.000202525	C3H5O6P	-H(-)	100	Phosphoenolpyruvate	PEP; Phosphoenolpyruvate; Phosphoenolpyruvic acid		C00074
165	166.975	TRUE	0.776482	5234.39	0.000202525	C3H5O6P	-H(-)	100	3-Phosphonopyruvate	3-Phosphonopyruvate		C02798
165	166.975	TRUE	0.776482	5234.39	0.000202525	C3H5O6P	-H(-)	100	Hydroxypyruvaldehyde phosphate	2,3-Dioxopropyl phosphate; Hydroxypyruvaldehyde phosphate		C16849
166	167.021	TRUE	0.754107	6627.59	0.000273279	C5H4N4O3	-H(-)	100	Urate	Urate; Uric acid		C00366
167	167.035	TRUE	0.755097	28917.3	-8.73646e-06	C8H8O4	-H(-)	100	Homogentisate	2,5-Dihydroxyphenylacetate; 2,5-Dihydroxyphenylacetic acid; Homogentisate; Homogentisic acid		C00544
167	167.035	TRUE	0.755097	28917.3	-8.73646e-06	C8H8O4	-H(-)	100	3,4-Dihydroxyphenylacetate	3,4-Dihydroxyphenylacetate; 3,4-Dihydroxyphenylacetic acid; Homoprotocatechuate		C01161
167	167.035	TRUE	0.755097	28917.3	-8.73646e-06	C8H8O4	-H(-)	100	Orsellinate	2,4-Dihydroxy-6-methylbenzoate; 2,4-Dihydroxy-6-methylbenzoic acid; 4,6-Dihydroxy-o-toluic acid; Orsellinate; o-Orsellinic acid		C01839
167	167.035	TRUE	0.755097	28917.3	-8.73646e-06	C8H8O4	-H(-)	100	(S)-4-Hydroxymandelate	(S)-2-Hydroxy-2-(4-hydroxyphenyl)acetate; (S)-4-Hydroxymandelate		C03198
167	167.035	TRUE	0.755097	28917.3	-8.73646e-06	C8H8O4	-H(-)	100	4-Hydroxypheoxyacetate	4-Hydroxypheoxyacetate		C03235
167	167.035	TRUE	0.755097	28917.3	-8.73646e-06	C8H8O4	-H(-)	100	(R)-4-Hydroxymandelate	(R)-4-Hydroxymandelate		C05343
167	167.035	TRUE	0.755097	28917.3	-8.73646e-06	C8H8O4	-H(-)	100	3,4-Dihydroxymandelaldehyde	3,4-Dihydroxymandelaldehyde; 3,4-Dihydroxyphenylglycolaldehyde		C05577
167	167.035	TRUE	0.755097	28917.3	-8.73646e-06	C8H8O4	-H(-)	100	2,6-Dihydroxyphenylacetate	2,6-Dihydroxyphenylacetate		C06207
167	167.035	TRUE	0.755097	28917.3	-8.73646e-06	C8H8O4	-H(-)	100	Vanillate	4-Hydroxy-3-methoxybenzoate; 4-Hydroxy-3-methoxybenzoic acid; Vanillate; Vanillic acid		C06672
167	167.035	TRUE	0.755097	28917.3	-8.73646e-06	C8H8O4	-H(-)	100	2-Hydroxy-6-oxoocta-2,4,7-trienoate	2-Hydroxy-6-oxoocta-2,4,7-trienoate		C07087
167	167.035	TRUE	0.755097	28917.3	-8.73646e-06	C8H8O4	-H(-)	100	2,6-Dimethoxybenzoquinone	2,6-Dimethoxybenzoquinone; 2,6-Dimetoxy-p-benzoquinone		C10331
167	167.035	TRUE	0.755097	28917.3	-8.73646e-06	C8H8O4	-H(-)	100	4-Hydroxymandelate	4-Hydroxymandelate; 4-Hydroxymandelic acid		C11527
167	167.035	TRUE	0.755097	28917.3	-8.73646e-06	C8H8O4	-H(-)	100	4-Hydroxymethylsalicylate	2-Hydroxy-4-hydroxymethylbenzoic acid; 4-Hydroxymethylsalicylate		C14109
167	167.035	TRUE	0.755097	28917.3	-8.73646e-06	C8H8O4	-H(-)	100	1,2-Dihydrophthalic acid	1,2-Dihydrophthalic acid; Cyclohexa-3,5-diene-1,2-dicarboxylate		C16215
167	167.035	TRUE	0.755097	28917.3	-8.73646e-06	C8H8O4.	-H(-)	100	4-Methoxy potassium salicylate	4-Methoxy potassium salicylate; 4MSK		C18346
168	167.046	TRUE	0.884022	32064.4	0.000632104	C7H8N2O3	-H(-)	100	5-Nitro-ortho-anisidine	2-Methoxy-5-nitroaniline; 5-Nitro-ortho-anisidine		C19469
169	167.071	TRUE	0.752231	11440.6	0.000525776	C5H15NO3P	-H(-)	100	N-Trimethyl-2-aminoethylphosphonate	2-Trimethylaminoethylphosphonate; N-Trimethyl-2-aminoethylphosphonate		C06459
170	167.082	TRUE	0.860554	50369.7	0.000305976	C8H12N2O2	-H(-)	100	Pyridoxamine	PM; Pyridoxamine		C00534
170	167.082	TRUE	0.860554	50369.7	0.000305976	C8H12N2O2	-H(-)	100	Cyclo(deltaAla-L-Val)	Cyclo(deltaAla-L-Val)		C11846
170	167.082	TRUE	0.860554	50369.7	0.000305976	C8H12N2O2	-H(-)	100	4-PIOL	4-PIOL; 5-(4-Piperidyl)isoxazol-3-ol		C13710
171	167.107	TRUE	0.694011	8603.88	0.000316504	C10H16O2	-H(-)	100	6-Oxocineole	(1R,4S)-1,3,3-Trimethyl-2-oxabicyclo[2.2.2]octan-6-one; 2-Oxo-1,8-cineole; 6-Oxocineole		C00848
171	167.107	TRUE	0.694011	8603.88	0.000316504	C10H16O2	-H(-)	100	1,2-Campholide	1,2-Campholide		C02108
171	167.107	TRUE	0.694011	8603.88	0.000316504	C10H16O2	-H(-)	100	(+)-exo-5-Hydroxycamphor	(+)-exo-5-Hydroxycamphor; 5-exo-Hydroxycamphor		C03448
171	167.107	TRUE	0.694011	8603.88	0.000316504	C10H16O2	-H(-)	100	Iridodial	Iridodial; cis-trans-Iridodial		C06069
171	167.107	TRUE	0.694011	8603.88	0.000316504	C10H16O2	-H(-)	100	(Z)-3,5-Hexadienyl butyrate	(Z)-3,5-Hexadienyl butyrate		C08489
171	167.107	TRUE	0.694011	8603.88	0.000316504	C10H16O2	-H(-)	100	Lilac aldehyde	Lilac aldehyde		C08498
171	167.107	TRUE	0.694011	8603.88	0.000316504	C10H16O2	-H(-)	100	Tiglyl tiglate	(E)-2-Methylcrotonic acid (E)-2-methyl-2-butenyl ester; Tiglyl tiglate		C08546
171	167.107	TRUE	0.694011	8603.88	0.000316504	C10H16O2	-H(-)	100	(+)-Iridodial	(+)-Iridodial		C09785
171	167.107	TRUE	0.694011	8603.88	0.000316504	C10H16O2	-H(-)	100	Iridomyrmecin	Iridomyrmecin		C09786
171	167.107	TRUE	0.694011	8603.88	0.000316504	C10H16O2	-H(-)	100	cis-trans-Nepetalactol	cis-trans-Iridodial lactol; cis-trans-Nepetalactol		C09804
171	167.107	TRUE	0.694011	8603.88	0.000316504	C10H16O2	-H(-)	100	Ascaridole	Ascaridole		C09836
171	167.107	TRUE	0.694011	8603.88	0.000316504	C10H16O2	-H(-)	100	Chrysanthemic acid	Chrysanthemic acid		C09842
171	167.107	TRUE	0.694011	8603.88	0.000316504	C10H16O2	-H(-)	100	Diosphenol	Diosphenol		C09854
171	167.107	TRUE	0.694011	8603.88	0.000316504	C10H16O2	-H(-)	100	(4R,7R)-4-Isopropenyl-7-methyl-2-oxo-oxepanone	(4R,7R)-4-Isopropenyl-7-methyl-2-oxo-oxepanone		C11402
171	167.107	TRUE	0.694011	8603.88	0.000316504	C10H16O2	-H(-)	100	(3S,6R)-6-Isopropenyl-3-methyl-2-oxo-oxepanone	(3S,6R)-6-Isopropenyl-3-methyl-2-oxo-oxepanone		C11403
171	167.107	TRUE	0.694011	8603.88	0.000316504	C10H16O2	-H(-)	100	(4S,7R)-4-Isopropenyl-7-methyl-2-oxo-oxepanone	(4S,7R)-4-Isopropenyl-7-methyl-2-oxo-oxepanone; 4-Isopropenyl-7-methyloxepan-2-one		C11414
171	167.107	TRUE	0.694011	8603.88	0.000316504	C10H16O2	-H(-)	100	(3S,6S)-6-Isopropenyl-3-methyl-2-oxo-oxepanone	(3S,6S)-6-Isopropenyl-3-methyl-2-oxo-oxepanone		C11418
171	167.107	TRUE	0.694011	8603.88	0.000316504	C10H16O2	-H(-)	100	8-Epiiridodial	8-Epiiridodial		C11651
171	167.107	TRUE	0.694011	8603.88	0.000316504	C10H16O2	-H(-)	100	(1S,4R)-1-Hydroxy-2-oxolimonene	(1S,4R)-1-Hydroxy-2-oxolimonene; (1S,4R)-1-Hydroxymenth-8-en-2-one		C11937
171	167.107	TRUE	0.694011	8603.88	0.000316504	C10H16O2	-H(-)	100	trans-2-Methyl-5-isopropylhexa-2,5-dienoic acid	trans-2-Methyl-5-isopropylhexa-2,5-dienoic acid		C11943
171	167.107	TRUE	0.694011	8603.88	0.000316504	C10H16O2	-H(-)	100	cis-2-Methyl-5-isopropylhexa-2,5-dienoic acid	cis-2-Methyl-5-isopropylhexa-2,5-dienoic acid		C11944
171	167.107	TRUE	0.694011	8603.88	0.000316504	C10H16O2	-H(-)	100	Geranic acid	3,7-Dimethylocta-2,6-dienoate; Geranate; Geranic acid		C16461
171	167.107	TRUE	0.694011	8603.88	0.000316504	C10H16O2	-H(-)	100	1-Hydroxy-p-menth-8-en-2-one	1-Hydroxy-p-menth-8-en-2-one; 1-Hydroxymenth-8-en-2-one; 2-Hydroxy-2-methyl-5-(1-methylethenyl)cyclohexanone		C18019
171	167.107	TRUE	0.694011	8603.88	0.000316504	C10H16O2	-H(-)	100	(1R,4S)-1-Hydroxy-2-oxolimonene	(1R,4S)-1-Hydroxy-2-oxolimonene		C19083
171	167.107	TRUE	0.694011	8603.88	0.000316504	C10H16O2	-H(-)	100	(3S)-3-Hydroxycyclocitral	(3S)-3-Hydroxycyclocitral		C19731
171	167.107	TRUE	0.694011	8603.88	0.000316504	C10H16O2	-H(-)	100	(6E)-8-Oxolinalool	(6E)-8-Oxolinalool; trans-8-Oxolinalool		C20221
171	167.107	TRUE	0.694011	8603.88	0.000316504	C10H16O2	-H(-)	100	(6E)-8-Hydroxygeranial	(6E)-8-Hydroxygeranial		C20222
171	167.107	TRUE	0.694011	8603.88	0.000316504	C10H16O2	-H(-)	100	(6E)-8-Oxogeraniol	(6E)-8-Oxogeraniol		C20223
171	167.107	TRUE	0.694011	8603.88	0.000316504	C10H16O2	-H(-)	100	(+)-6-exo-Hydroxycamphor	(+)-6-exo-Hydroxycamphor		C20322
171	167.107	TRUE	0.694011	8603.88	0.000316504	C10H16O2	-H(-)	100	(+)-6-endo-Hydroxycamphor	(+)-6-endo-Hydroxycamphor		C20323
172	168.012	TRUE	0.773832	4800.44	-5.69151e-06	C7H7NO2S	-H(-)	100	Thiobenzamide S,S-dioxide	Thiobenzamide S,S-dioxide		C16285
173	168.043	TRUE	0.955713	49156	0.000439587	C4H12NO4P	-H(-)	100	Phosphodimethylethanolamine	Phosphodimethylethanolamine		C13482
174	168.066	TRUE	0.877488	26360.7	0.000117238	C8H11NO3	-H(-)	100	Pyridoxine	Pyridoxine; Pyridoxol		C00314
174	168.066	TRUE	0.877488	26360.7	0.000117238	C8H11NO3	-H(-)	100	L-Noradrenaline	4-[(1R)-2-Amino-1-hydroxyethyl]-1,2-benzenediol; Arterenol; L-Noradrenaline; Noradrenaline; Norepinephrine		C00547
175	169.013	TRUE	0.831503	30080.6	0.000770583	C7H6O5	-H(-)	100	Gallate	3,4,5-Trihydroxybenzoate; 3,4,5-Trihydroxybenzoic acid; Gallate; Gallic acid; Pyrogallol-5-carboxylic acid		C01424
176	169.05	TRUE	0.798719	14859.3	0.000742169	C8H10O4	-H(-)	100	3,4-Dihydroxyphenylethyleneglycol	3,4-Dihydroxyphenylethyleneglycol		C05576
176	169.05	TRUE	0.798719	14859.3	0.000742169	C8H10O4	-H(-)	100	1,6-Dihydroxy-5-methylcyclohexa-2,4-dienecarboxylate	1,2-Dihydroxy-3-methylcyclohexa-3,5-dienecarboxylate; 1,6-Dihydroxy-5-methylcyclohexa-2,4-dienecarboxylate		C06720
176	169.05	TRUE	0.798719	14859.3	0.000742169	C8H10O4	-H(-)	100	cis-1,2-Dihydroxy-4-methylcyclohexa-3,5-diene-1-carboxylate	4-Methylcyclohexa-3,5-diene-1,2-cis-diol-1-carboxylic acid; cis-1,2-Dihydroxy-4-methylcyclohexa-3,5-diene-1-carboxylate		C06729
176	169.05	TRUE	0.798719	14859.3	0.000742169	C8H10O4	-H(-)	100	1,2-Dihydroxy-6-methylcyclohexa-3,5-dienecarboxylate	1,2-Dihydroxy-6-methylcyclohexa-3,5-dienecarboxylate		C06731
176	169.05	TRUE	0.798719	14859.3	0.000742169	C8H10O4	-H(-)	100	2-Hydroxy-6-oxo-octa-2,4-dienoate	2-Hydroxy-6-oxo-octa-2,4-dienoate		C07123
176	169.05	TRUE	0.798719	14859.3	0.000742169	C8H10O4	-H(-)	100	Penicillic acid	Penicillic acid		C16804
176	169.05	TRUE	0.798719	14859.3	0.000742169	C8H10O4	-H(-)	100	Penicillic acid	3-Methoxy-5-methyl-4-oxo-2,5-hexadienoic acid; Penicillic acid		C19495
177	169.062	TRUE	0.908014	125991	0.000246125	C7H10N2O3	-H(-)	100	N-Nitrosoguvacoline	N-Nitrosoguvacoline		C19482
178	169.087	TRUE	0.769604	18907.4	-0.000165791	C9H14O3	-H(-)	100	Furfural diethyl acetal	Furfural diethyl acetal		C14280
179	169.098	TRUE	0.866496	83885.4	0.000190349	C8H14N2O2	-H(-)	100	Levetiracetam	Levetiracetam		C07841
180	170.057	TRUE	0.893532	27040.2	-0.000357201	C6H9N3O3	-H(-)	100	Metronidazole	Metronidazole		C07203
181	171.006	TRUE	0.960535	167405	0.000207856	C3H9O6P	-H(-)	100	sn-Glycerol 3-phosphate	D-Glycerol 1-phosphate; Glycerophosphoric acid; sn-Glycerol 3-phosphate		C00093
181	171.006	TRUE	0.960535	167405	0.000207856	C3H9O6P	-H(-)	100	sn-Glycerol 1-phosphate	L-Glycerol 1-phosphate; sn-Glycerol 1-phosphate; sn-Gro-1-P		C00623
181	171.006	TRUE	0.960535	167405	0.000207856	C3H9O6P	-H(-)	100	Glycerol 2-phosphate	Glycerol 2-phosphate; beta-Glycerophosphoric acid		C02979
181	171.006	TRUE	0.960535	167405	0.000207856	C3H9O6P	-H(-)	100	DL-Glycerol 1-phosphate	DL-Glycerol 1-phosphate; DL-Glycerol 3-phosphate; DL-Glyceryl 1-phosphate; Glycerol 1-phosphate; Glycerol-3-phosphate; rac-Glycerol 1-phosphate		C03189
182	171.041	TRUE	0.938425	96067	2.67914e-05	C6H8N2O4	-H(-)	100	Hydantoin-5-propionate	Hydantoin-5-propionate; Hydantoin-propionate		C05565
182	171.041	TRUE	0.938425	96067	2.67914e-05	C6H8N2O4	-H(-)	100	(R)-AMAA	(R)-2-Amino-2-(3-hydroxy-5-methyl-4-isoxazolyl)acetic acid; (R)-AMAA		C13739
183	171.103	TRUE	0.838363	96637.9	3.75971e-05	C9H16O3	-H(-)	100	9-Oxononanoic acid	9-Oxononanoic acid		C16322
184	171.139	TRUE	0.580047	61518.5	0.000239252	C10H20O2	-H(-)	100	Decanoic acid	Decanoate; Decanoic acid; Decylic acid; n-Capric acid		C01571
184	171.139	TRUE	0.580047	61518.5	0.000239252	C10H20O2	-H(-)	100	p-Menthane-3,8-diol	(-)-3,8-p-Menthanediol; p-Menthane-3,8-diol		C02904
184	171.139	TRUE	0.580047	61518.5	0.000239252	C10H20O2	-H(-)	100	Isoamyl isovalerate	Isoamyl isovalerate		C12289
184	171.139	TRUE	0.580047	61518.5	0.000239252	C10H20O2	-H(-)	100	Ethyl octanoate	Ethyl caprylate; Ethyl octanoate		C12292
185	172.061	TRUE	0.912109	25272.1	0.00028567	C7H11NO4	-H(-)	100	N-Acetyl-L-glutamate 5-semialdehyde	2-Acetamido-5-oxopentanoate; N-Acetyl-L-glutamate 5-semialdehyde		C01250
185	172.061	TRUE	0.912109	25272.1	0.00028567	C7H11NO4	-H(-)	100	5-Deoxy-5-aminoshikimic acid	5-Deoxy-5-aminoshikimic acid		C12121
185	172.061	TRUE	0.912109	25272.1	0.00028567	C7H11NO4	-H(-)	100	(2S,5S)-trans-Carboxymethylproline	(2S,5S)-5-Carboxymethylproline; (2S,5S)-trans-Carboxymethylproline		C17366
186	172.098	TRUE	0.877139	124336	0.000209228	C8H15NO3	-H(-)	100	N-Acetyl-L-leucine	N-Acetyl-L-leucine		C02710
186	172.098	TRUE	0.877139	124336	0.000209228	C8H15NO3	-H(-)	100	Swainsonine	Swainsonine		C10173
187	172.11	TRUE	0.894525	25133.9	-0.000414921	C7H15N3O2	-H(-)	100	Indospicine	Indospicine; L-Indospicine		C08288
188	173.009	TRUE	0.736724	102028	0.00019893	C6H6O6	-H(-)	100	cis-Aconitate	cis-Aconitate; cis-Aconitic acid		C00417
188	173.009	TRUE	0.736724	102028	0.00019893	C6H6O6	-H(-)	100	trans-Aconitate	trans-Aconitate; trans-Aconitic acid		C02341
188	173.009	TRUE	0.736724	102028	0.00019893	C6H6O6	-H(-)	100	Dehydroascorbate	Dehydroascorbate; Dehydroascorbic acid; L-Dehydroascorbate; L-Dehydroascorbic acid		C05422
189	173.104	TRUE	0.962259	1.87564e+06	0.000270059	C6H14N4O2	-H(-)	93	L-Arginine	(S)-2-Amino-5-guanidinovaleric acid; L-Arg; L-Arginine		C00062
189	173.104	TRUE	0.962259	1.87564e+06	0.000270059	C6H14N4O2	-H(-)	93	D-Arginine	D-2-Amino-5-guanidinovaleric acid; D-Arginine		C00792
189	173.104	TRUE	0.962259	1.87564e+06	0.000270059	C6H14N4O2	-H(-)	93	Amino acid(Arg-)	2-Amino-5-guanidinovaleric acid; Amino acid(Arg-); Arginine		C02385
190	174.041	TRUE	0.914059	43290	0.000179438	C6H9NO5	-H(-)	100	N-Acetyl-L-aspartate	N-Acetyl-L-aspartate; N-Acetyl-L-aspartic acid		C01042
190	174.041	TRUE	0.914059	43290	0.000179438	C6H9NO5	-H(-)	100	N-Formyl-L-glutamate	N-Formyl-L-glutamate		C01045
190	174.041	TRUE	0.914059	43290	0.000179438	C6H9NO5	-H(-)	100	2-Amino-3-oxoadipate	2-Amino-3-oxoadipate; 2-Amino-3-oxohexanedioic acid		C05520
191	174.056	TRUE	0.821016	29539.4	-4.52604e-05	C10H9NO2	-H(-)	100	Indole-3-acetate	(Indol-3-yl)acetate; IAA; Indole-3-acetate; Indole-3-acetic acid; Indoleacetate; Indoleacetic acid		C00954
191	174.056	TRUE	0.821016	29539.4	-4.52604e-05	C10H9NO2	-H(-)	100	NH2Mec	7-Amino-4-methylcoumarin; NH2Mec		C01386
191	174.056	TRUE	0.821016	29539.4	-4.52604e-05	C10H9NO2	-H(-)	100	N-Acetylindoxyl	Acetylindoxyl; N-Acetylindoxyl		C02298
191	174.056	TRUE	0.821016	29539.4	-4.52604e-05	C10H9NO2	-H(-)	100	(Indol-3-yl)glycolaldehyde	(Indol-3-yl)glycolaldehyde; 3-Indoleglycolaldehyde		C03230
191	174.056	TRUE	0.821016	29539.4	-4.52604e-05	C10H9NO2	-H(-)	100	5-Hydroxyindoleacetaldehyde	5-Hydroxyindoleacetaldehyde		C05634
191	174.056	TRUE	0.821016	29539.4	-4.52604e-05	C10H9NO2	-H(-)	100	2-Methylquinoline-3,4-diol	2-Methylquinoline-3,4-diol		C06331
191	174.056	TRUE	0.821016	29539.4	-4.52604e-05	C10H9NO2	-H(-)	100	3-Methyl-quinolin-2,8-diol	3-Methyl-quinolin-2,8-diol		C06344
191	174.056	TRUE	0.821016	29539.4	-4.52604e-05	C10H9NO2	-H(-)	100	Gentianine	Gentianine		C06525
191	174.056	TRUE	0.821016	29539.4	-4.52604e-05	C10H9NO2	-H(-)	100	3-Hydroxy-2-methyl-1H-quinolin-4-one	3-Hydroxy-2-methyl-1H-quinolin-4-one		C11504
192	174.077	TRUE	0.918495	57672.7	5.49615e-05	C7H13NO4	-H(-)	100	Calystegin B2	Calystegin B2; Calystegine B2		C10851
193	175.025	TRUE	0.89474	115123	0.00028094	C6H8O6	-H(-)	100	Ascorbate	Ascorbate; Ascorbic acid; L-Ascorbate; L-Ascorbic acid; Vitamin C		C00072
193	175.025	TRUE	0.89474	115123	0.00028094	C6H8O6	-H(-)	100	D-Glucuronolactone	D-Glucurone; D-Glucurono-3,6-lactone; D-Glucuronolactone; Glucurone		C02670
193	175.025	TRUE	0.89474	115123	0.00028094	C6H8O6	-H(-)	100	2-Hydroxy-3-oxoadipate	2-Hydroxy-3-oxoadipate		C03217
193	175.025	TRUE	0.89474	115123	0.00028094	C6H8O6	-H(-)	100	L-xylo-Hexulonolactone	L-xylo-Hex-2-ulono-1,4-lactone; L-xylo-Hexulonolactone		C03289
193	175.025	TRUE	0.89474	115123	0.00028094	C6H8O6	-H(-)	100	D-Glucurono-6,2-lactone	D-Glucurono-6,2-lactone		C03387
193	175.025	TRUE	0.89474	115123	0.00028094	C6H8O6	-H(-)	100	5-Dehydro-4-deoxy-D-glucuronate	4-Deoxy-L-threo-5-hexosulose uronate; 5-Dehydro-4-deoxy-D-glucuronate		C04053
193	175.025	TRUE	0.89474	115123	0.00028094	C6H8O6	-H(-)	100	(4S)-4,6-Dihydroxy-2,5-dioxohexanoate	(4S)-4,6-Dihydroxy-2,5-dioxohexanoate; 2,5-Diketo-3-deoxy-D-gluconate; 3-Deoxy-D-glycero-2,5-hexodiulosonate		C04349
193	175.025	TRUE	0.89474	115123	0.00028094	C6H8O6	-H(-)	100	(4S,5S)-4,5-Dihydroxy-2,6-dioxohexanoate	(4S,5S)-4,5-Dihydroxy-2,6-dioxohexanoate		C04471
193	175.025	TRUE	0.89474	115123	0.00028094	C6H8O6	-H(-)	100	Parapyruvate	4-Hydroxy-4-methyl-2-oxoglutarate; Parapyruvate		C06033
193	175.025	TRUE	0.89474	115123	0.00028094	C6H8O6	-H(-)	100	D-Galacturonolactone	D-Galacturonolactone; D-gamma-Galacturonolactone		C06430
193	175.025	TRUE	0.89474	115123	0.00028094	C6H8O6	-H(-)	100	2-Dehydro-D-glucono-1,5-lactone	2-Dehydro-D-glucono-1,5-lactone		C06440
193	175.025	TRUE	0.89474	115123	0.00028094	C6H8O6	-H(-)	100	Propane-1,2,3-tricarboxylate	Propane-1,2,3-tricarboxylate; Tricarballylate		C19806
193	175.025	TRUE	0.89474	115123	0.00028094	C6H8O6	-H(-)	100	Erythorbic acid	Erythorbic acid; Isoascorbic acid		C20364
194	175.061	TRUE	0.885316	49919.9	-9.31064e-06	C7H12O5	-H(-)	100	3-Propylmalate	3-Propylmalate		C02123
194	175.061	TRUE	0.885316	49919.9	-9.31064e-06	C7H12O5	-H(-)	100	alpha-Isopropylmalate	(2S)-2-Hydroxy-2-isopropylsuccinic acid; (2S)-2-Isopropylmalate; 2-Isopropylmalic acid; 3-Carboxy-3-hydroxy-4-methylpentanoate; 3-Carboxy-3-hydroxyisocaproate; alpha-Isopropylmalate		C02504
194	175.061	TRUE	0.885316	49919.9	-9.31064e-06	C7H12O5	-H(-)	100	(R)-2-(n-Propyl)-malate	(R)-2-(n-Propyl)-malate		C03328
194	175.061	TRUE	0.885316	49919.9	-9.31064e-06	C7H12O5	-H(-)	100	(2R,3S)-3-Isopropylmalate	(2R,3S)-3-Isopropylmalate; 2-D-threo-Hydroxy-3-carboxy-isocaproate; 3-Carboxy-2-hydroxy-4-methylpentanoate; 3-Isopropylmalate		C04411
195	175.072	TRUE	0.846338	76684.8	-1.92418e-05	C6H12N2O4	-H(-)	100	D-Alanyl-D-serine	D-Alanyl-D-serine		C19719
196	176.057	TRUE	0.912211	29156.5	-9.72625e-05	C6H11NO5	-H(-)	100	4-Hydroxy-4-methylglutamate	4-Hydroxy-4-methylglutamate		C06034
196	176.057	TRUE	0.912211	29156.5	-9.72625e-05	C6H11NO5	-H(-)	100	3-Keto-scyllo-inosamine	3-Keto-scyllo-inosamine		C17576
196	176.057	TRUE	0.912211	29156.5	-9.72625e-05	C6H11NO5	-H(-)	100	(2Z,4S,5R)-2-Amino-4,5,6-trihydroxyhex-2-enoate	(2Z,4S,5R)-2-Amino-4,5,6-trihydroxyhex-2-enoate		C20844
196	176.057	TRUE	0.912211	29156.5	-9.72625e-05	C6H11NO5	-H(-)	100	(4S,5R)-4,5,6-Trihydroxy-2-iminohexanoate	(4S,5R)-4,5,6-Trihydroxy-2-iminohexanoate		C20845
197	176.082	TRUE	0.760264	8927.19	0.000530863	C9H11N3O	-H(-)	100	N'-Nitrosonornicotine	N'-Nitrosonornicotine; NNN		C16452
198	177.04	TRUE	0.914856	186899	0.000169173	C6H10O6	-H(-)	100	D-Glucono-1,5-lactone	1,5-Gluconolactone; D-Glucono-1,5-lactone; D-Gluconolactone; Gluconic acid lactone; Gluconic lactone; Gluconolactone; delta-Gluconolactone		C00198
198	177.04	TRUE	0.914856	186899	0.000169173	C6H10O6	-H(-)	100	2-Dehydro-3-deoxy-D-gluconate	2-Dehydro-3-deoxy-D-gluconate; 2-Keto-3-deoxy-D-gluconate		C00204
198	177.04	TRUE	0.914856	186899	0.000169173	C6H10O6	-H(-)	100	5-Dehydro-D-fructose	5-Dehydro-D-fructose		C00273
198	177.04	TRUE	0.914856	186899	0.000169173	C6H10O6	-H(-)	100	2,4,6/3,5-Pentahydroxycyclohexanone	2,4,6/3,5-Pentahydroxycyclohexanone; 2-Inosose; scyllo-Inosose		C00691
198	177.04	TRUE	0.914856	186899	0.000169173	C6H10O6	-H(-)	100	L-Gulono-1,4-lactone	L-Gulonic acid gamma-lactone; L-Gulono-1,4-lactone; L-Gulono-gamma-lactone; L-Gulonolactone; gamma-Gulonolactone		C01040
198	177.04	TRUE	0.914856	186899	0.000169173	C6H10O6	-H(-)	100	L-Galactono-1,4-lactone	L-Galactono-1,4-lactone		C01115
198	177.04	TRUE	0.914856	186899	0.000169173	C6H10O6	-H(-)	100	2-Dehydro-3-deoxy-D-galactonate	2-Dehydro-3-deoxy-D-galactonate		C01216
198	177.04	TRUE	0.914856	186899	0.000169173	C6H10O6	-H(-)	100	D-Galactono-1,5-lactone	D-Galactono-1,5-lactone		C02669
198	177.04	TRUE	0.914856	186899	0.000169173	C6H10O6	-H(-)	100	Hexose-1,5-lactone	Hexose-1,5-lactone		C02692
198	177.04	TRUE	0.914856	186899	0.000169173	C6H10O6	-H(-)	100	2-Dehydro-D-glucose	2-Dehydro-D-glucose		C02779
198	177.04	TRUE	0.914856	186899	0.000169173	C6H10O6	-H(-)	100	D-Glucono-1,4-lactone	D-Glucono-1,4-lactone		C03107
198	177.04	TRUE	0.914856	186899	0.000169173	C6H10O6	-H(-)	100	D-galacto-Hexodialdose	D-galacto-Hexodialdose		C03269
198	177.04	TRUE	0.914856	186899	0.000169173	C6H10O6	-H(-)	100	D-Galactono-1,4-lactone	D-Galactono-1,4-lactone; gamma-D-Galactonolactone		C03383
198	177.04	TRUE	0.914856	186899	0.000169173	C6H10O6	-H(-)	100	3-Dehydro-2-deoxy-D-gluconate	3-Dehydro-2-deoxy-D-gluconate		C03926
198	177.04	TRUE	0.914856	186899	0.000169173	C6H10O6	-H(-)	100	3-Keto-beta-D-galactose	3-Keto-beta-D-galactose		C05394
198	177.04	TRUE	0.914856	186899	0.000169173	C6H10O6	-H(-)	100	Gulono-1,4-lactone	Gulono-1,4-lactone; Gulonolactone		C05410
198	177.04	TRUE	0.914856	186899	0.000169173	C6H10O6	-H(-)	100	2-Deoxy-5-keto-D-gluconic acid	2-Deoxy-5-keto-D-gluconic acid; 2-Deoxy-D-threo-hex-5-ulosonic acid; 5-Dehydro-2-deoxy-D-gluconate; DKH		C06892
198	177.04	TRUE	0.914856	186899	0.000169173	C6H10O6	-H(-)	100	5-Deoxy-D-glucuronate	5-Deoxy glucuronic acid; 5-Deoxy-D-glucuronate; 5-Deoxy-D-xylo-hexuronic acid		C16737
198	177.04	TRUE	0.914856	186899	0.000169173	C6H10O6	-H(-)	100	myo-Inosose-5	myo-Inosose-5		C17577
198	177.04	TRUE	0.914856	186899	0.000169173	C6H10O6	-H(-)	100	L-Sorbosone	1-Dehydro-L-sorbose; L-Sorbosone		C19679
198	177.04	TRUE	0.914856	186899	0.000169173	C6H10O6	-H(-)	100	1-Keto-D-chiro-inositol	1-Keto-D-chiro-inositol; 2D-2,3,5/4,6-Pentahydroxycyclohexanone		C20251
198	177.04	TRUE	0.914856	186899	0.000169173	C6H10O6	-H(-)	100	2-Dehydro-3-deoxy-L-galactonate	2-Dehydro-3-deoxy-L-galactonate; 2-Keto-3-deoxy-L-galactonate; L-threo-3-Deoxy-hexulosonate		C20680
199	177.056	TRUE	0.882603	31179.1	-0.000382701	C10H10O3	-H(-)	100	Vermelone	3,4-Dihydro-3,8-dihydroxy-1(2H)-naphthalenone; Vermelone		C01624
199	177.056	TRUE	0.882603	31179.1	-0.000382701	C10H10O3	-H(-)	100	Coniferyl aldehyde	4-Hydroxy-3-methoxycinnamaldehyde; Coniferaldehyde; Coniferyl aldehyde; Ferulaldehyde		C02666
199	177.056	TRUE	0.882603	31179.1	-0.000382701	C10H10O3	-H(-)	100	3-Acetyl-6-methoxybenzaldehyde	3-Acetyl-6-methoxybenzaldehyde		C10667
199	177.056	TRUE	0.882603	31179.1	-0.000382701	C10H10O3	-H(-)	100	1,2-Dihydroxy-3,4-epoxy-1,2,3,4-tetrahydronaphthalene	1,2-Dihydroxy-3,4-epoxy-1,2,3,4-tetrahydronaphthalene		C14784
199	177.056	TRUE	0.882603	31179.1	-0.000382701	C10H10O3	-H(-)	100	2-Oxo-4-phenylbutyric acid	2-Oxo-4-phenylbutanoate; 2-Oxo-4-phenylbutanoic acid; 2-Oxo-4-phenylbutyric acid		C20327
199	177.056	TRUE	0.882603	31179.1	-0.000382701	C10H10O3	-H(-)	100	(3S)-2-Oxo-3-phenylbutanoate	(3S)-2-Oxo-3-phenylbutanoate; (3S)-beta-Methylphenylpyruvate		C20646
200	177.077	TRUE	0.735034	17115.5	-0.00021732	C7H14O5	-H(-)	100	Digitalose	Digitalose; beta-D-Digitalopyranose		C08235
200	177.077	TRUE	0.735034	17115.5	-0.00021732	C7H14O5	-H(-)	100	D-Thevetose	D-Thevetose		C16287
201	177.091	TRUE	0.302571	13010.3	0.000685876	C11H14O2	-H(-)	100	Methyleugenol	Eugenol methyl ether; Methyleugenol; O-Methyleugenol		C10454
201	177.091	TRUE	0.302571	13010.3	0.000685876	C11H14O2	-H(-)	100	Methylisoeugenol	Isomethyleugenol; Methylisoeugenol; trans-Methylisoeugenol		C10478
201	177.091	TRUE	0.302571	13010.3	0.000685876	C11H14O2	-H(-)	100	4-t-Butylbenzoic acid	4-t-Butylbenzoic acid; p-tert-Butylbenzoic acid		C14535
201	177.091	TRUE	0.302571	13010.3	0.000685876	C11H14O2	-H(-)	100	1,1-Dimethylethyl benzoate	1,1-Dimethylethyl benzoate; tert-Butyl benzoate		C14709
201	177.091	TRUE	0.302571	13010.3	0.000685876	C11H14O2	-H(-)	100	3-Phenylpropyl acetate	3-Phenylpropyl acetate; Hydrocinnamyl acetate		C17663
201	177.091	TRUE	0.302571	13010.3	0.000685876	C11H14O2	-H(-)	100	2-Phenylpropyl acetate	2-Phenylpropyl acetate		C17665
201	177.091	TRUE	0.302571	13010.3	0.000685876	C11H14O2	-H(-)	100	1-Phenylpropyl acetate	1-Phenylpropyl acetate		C17666
201	177.091	TRUE	0.302571	13010.3	0.000685876	C11H14O2	-H(-)	100	3,5-Dimethoxyallylbenzene	3,5-Dimethoxyallylbenzene		C17782
202	177.103	TRUE	0.321212	11094	0.000500228	C10H14N2O	-H(-)	100	(S)-6-Hydroxynicotine	(S)-6-Hydroxynicotine		C01056
202	177.103	TRUE	0.321212	11094	0.000500228	C10H14N2O	-H(-)	100	(R)-6-Hydroxynicotine	(R)-6-Hydroxynicotine		C03043
202	177.103	TRUE	0.321212	11094	0.000500228	C10H14N2O	-H(-)	100	Glycinexylidide	GX; Glycinexylidide		C16569
202	177.103	TRUE	0.321212	11094	0.000500228	C10H14N2O	-H(-)	100	Pseudooxynicotine	4-(Methylamino)-1-(pyridin-3-yl)butan-1-one; Pseudooxynicotine		C20361
203	178.098	TRUE	0.554964	7378.53	0.00090449	C9H13N3O	-H(-)	100	Iproniazid	Iproniazid		C11777
204	179.035	TRUE	0.550309	40256.6	4.62211e-05	C9H8O4	-H(-)	100	3-(4-Hydroxyphenyl)pyruvate	3-(4-Hydroxyphenyl)pyruvate; 4-Hydroxyphenylpyruvate; p-Hydroxyphenylpyruvic acid		C01179
204	179.035	TRUE	0.550309	40256.6	4.62211e-05	C9H8O4	-H(-)	100	Caffeate	3,4-Dihydroxy-trans-cinnamate; Caffeate; Caffeic acid; trans-Caffeate		C01197
204	179.035	TRUE	0.550309	40256.6	4.62211e-05	C9H8O4	-H(-)	100	Aspirin	2-Acetoxybenzenecarboxylic acid; Acetylsalicylate; Acetylsalicylic acid; Aspirin		C01405
204	179.035	TRUE	0.550309	40256.6	4.62211e-05	C9H8O4	-H(-)	100	Caffeate	3,4-Dihydroxycinnamic acid; Caffeate; Caffeic acid		C01481
204	179.035	TRUE	0.550309	40256.6	4.62211e-05	C9H8O4	-H(-)	100	2-Hydroxy-3-(4-hydroxyphenyl)propenoate	2-Hydroxy-3-(4-hydroxyphenyl)propenoate; 4-Hydroxy-enol-phenylpyruvate		C05350
204	179.035	TRUE	0.550309	40256.6	4.62211e-05	C9H8O4	-H(-)	100	trans-2,3-Dihydroxycinnamate	(2E)-3-(2,3-Dihydroxyphenyl)prop-2-enoate; trans-2,3-Dihydroxycinnamate		C12623
204	179.035	TRUE	0.550309	40256.6	4.62211e-05	C9H8O4.	-H(-)	100	Bufferin	Aspirin softam; Bufferin		C13400
205	179.056	TRUE	0.871638	2.32881e+06	5.86461e-05	C6H12O6	-H(-)	100	D-Glucose	D-Glucopyranose; D-Glucose; Dextrose; Glucose; Grape sugar		C00031
205	179.056	TRUE	0.871638	2.32881e+06	5.86461e-05	C6H12O6	-H(-)	100	D-Fructose	D-Fructose; D-arabino-Hexulose; Fruit sugar; Levulose		C00095
205	179.056	TRUE	0.871638	2.32881e+06	5.86461e-05	C6H12O6	-H(-)	100	D-Galactose	D-Galactopyranose; D-Galactose		C00124
205	179.056	TRUE	0.871638	2.32881e+06	5.86461e-05	C6H12O6	-H(-)	100	myo-Inositol	1D-myo-Inositol; 1L-myo-Inositol; Bios I; Cyclohexitol; D-myo-Inositol; Dambose; Inositol; L-myo-Inositol; Meat sugar; meso-Inositol; myo-Inositol		C00137
205	179.056	TRUE	0.871638	2.32881e+06	5.86461e-05	C6H12O6	-H(-)	100	D-Mannose	Carubinose; D-Mannose; Mannose; Seminose		C00159
205	179.056	TRUE	0.871638	2.32881e+06	5.86461e-05	C6H12O6	-H(-)	100	beta-D-Glucose	beta-D-Glucose		C00221
205	179.056	TRUE	0.871638	2.32881e+06	5.86461e-05	C6H12O6	-H(-)	100	L-Sorbose	L-Sorbose; L-xylo-Hexulose		C00247
205	179.056	TRUE	0.871638	2.32881e+06	5.86461e-05	C6H12O6	-H(-)	100	alpha-D-Glucose	alpha-D-Glucose		C00267
205	179.056	TRUE	0.871638	2.32881e+06	5.86461e-05	C6H12O6	-H(-)	100	D-Aldose	D-Aldose; D-Aldose1; D-Aldose2		C00737
205	179.056	TRUE	0.871638	2.32881e+06	5.86461e-05	C6H12O6	-H(-)	100	D-Hexose	D-Hexose; Hexose		C00738
205	179.056	TRUE	0.871638	2.32881e+06	5.86461e-05	C6H12O6	-H(-)	100	D-Sorbose	D-Sorbose; D-xylo-Hexulose		C00764
205	179.056	TRUE	0.871638	2.32881e+06	5.86461e-05	C6H12O6	-H(-)	100	D-Tagatose	D-Tagatose; lyxo-Hexulose		C00795
205	179.056	TRUE	0.871638	2.32881e+06	5.86461e-05	C6H12O6	-H(-)	100	alpha-D-Mannose	alpha-D-Mannose		C00936
205	179.056	TRUE	0.871638	2.32881e+06	5.86461e-05	C6H12O6	-H(-)	100	beta-D-Galactose	beta-D-Galactose		C00962
205	179.056	TRUE	0.871638	2.32881e+06	5.86461e-05	C6H12O6	-H(-)	100	alpha-D-Galactose	alpha-D-Galactose		C00984
205	179.056	TRUE	0.871638	2.32881e+06	5.86461e-05	C6H12O6	-H(-)	100	Sorbose	Sorbose; xylo-Hexulose		C01452
205	179.056	TRUE	0.871638	2.32881e+06	5.86461e-05	C6H12O6	-H(-)	100	D-Allose	D-Allose		C01487
205	179.056	TRUE	0.871638	2.32881e+06	5.86461e-05	C6H12O6	-H(-)	100	Galactose	Galactose		C01582
205	179.056	TRUE	0.871638	2.32881e+06	5.86461e-05	C6H12O6	-H(-)	100	D-Fuconate	D-Fuconate		C01680
205	179.056	TRUE	0.871638	2.32881e+06	5.86461e-05	C6H12O6	-H(-)	100	L-Fructose	L-Fructose; L-arabino-Hexulose		C01719
205	179.056	TRUE	0.871638	2.32881e+06	5.86461e-05	C6H12O6	-H(-)	100	L-Fuconate	L-Fuconate		C01720
205	179.056	TRUE	0.871638	2.32881e+06	5.86461e-05	C6H12O6	-H(-)	100	L-Galactose	L-Galactose		C01825
205	179.056	TRUE	0.871638	2.32881e+06	5.86461e-05	C6H12O6	-H(-)	100	D-Hamamelose	D-Hamamelose; Hamamelose		C01906
205	179.056	TRUE	0.871638	2.32881e+06	5.86461e-05	C6H12O6	-H(-)	100	L-Rhamnonate	6-Deoxy-L-mannonic acid; L-Rhamnonate		C01934
205	179.056	TRUE	0.871638	2.32881e+06	5.86461e-05	C6H12O6	-H(-)	100	beta-D-Mannose	beta-D-Mannose		C02209
205	179.056	TRUE	0.871638	2.32881e+06	5.86461e-05	C6H12O6	-H(-)	100	beta-D-Fructose	Fructose; beta-D-Fructose; beta-D-arabino-Hexulose; beta-Fruit sugar; beta-Levulose		C02336
205	179.056	TRUE	0.871638	2.32881e+06	5.86461e-05	C6H12O6	-H(-)	100	2-Deoxy-D-gluconate	2-Deoxy-D-gluconate		C02782
205	179.056	TRUE	0.871638	2.32881e+06	5.86461e-05	C6H12O6	-H(-)	100	Fructose(pyranose)	Fructose(pyranose)		C05003
205	179.056	TRUE	0.871638	2.32881e+06	5.86461e-05	C6H12O6	-H(-)	100	muco-Inositol	muco-Inositol		C06152
205	179.056	TRUE	0.871638	2.32881e+06	5.86461e-05	C6H12O6	-H(-)	100	scyllo-Inositol	Scyllitol; scyllo-Inositol		C06153
205	179.056	TRUE	0.871638	2.32881e+06	5.86461e-05	C6H12O6	-H(-)	100	D-Altrose	D-Altrose; D-altro-Hexose		C06464
205	179.056	TRUE	0.871638	2.32881e+06	5.86461e-05	C6H12O6	-H(-)	100	D-Gulose	D-Gulose; D-gulo-Hexose		C06465
205	179.056	TRUE	0.871638	2.32881e+06	5.86461e-05	C6H12O6	-H(-)	100	D-Idose	D-Idose; D-ido-Hexose		C06466
205	179.056	TRUE	0.871638	2.32881e+06	5.86461e-05	C6H12O6	-H(-)	100	D-Talose	D-Talose; D-talo-Hexose		C06467
205	179.056	TRUE	0.871638	2.32881e+06	5.86461e-05	C6H12O6	-H(-)	100	D-Psicose	D-Allulose; D-Altrulose; D-Pseudofructose; D-Psicose; D-erythro-Hexulose; D-ribo-2-Hexulose; D-ribo-2-Ketohexulose		C06468
205	179.056	TRUE	0.871638	2.32881e+06	5.86461e-05	C6H12O6	-H(-)	100	beta-D-Hamamelopyranose	beta-D-Hamamelopyranose; beta-D-Hamamelose		C08351
205	179.056	TRUE	0.871638	2.32881e+06	5.86461e-05	C6H12O6	-H(-)	100	alpha-L-Sorbopyranose	alpha-L-Sorbopyranose		C08356
205	179.056	TRUE	0.871638	2.32881e+06	5.86461e-05	C6H12O6	-H(-)	100	D-Fructose	D-Fructose		C10906
205	179.056	TRUE	0.871638	2.32881e+06	5.86461e-05	C6H12O6	-H(-)	100	L-Gulose	L-Gulose		C15923
205	179.056	TRUE	0.871638	2.32881e+06	5.86461e-05	C6H12O6	-H(-)	100	1D-chiro-Inositol	1,2,4/3,5,6-Cyclohexane-1,2,3,4,5,6-hexol; 1D-chiro-Inositol		C19891
206	180.066	TRUE	0.960673	852611	0.000496321	C9H11NO3	-H(-)	100	L-Tyrosine	(S)-2-Amino-3-(p-hydroxyphenyl)propionic acid; (S)-3-(p-Hydroxyphenyl)alanine; L-Tyrosine; Tyrosine		C00082
206	180.066	TRUE	0.960673	852611	0.000496321	C9H11NO3	-H(-)	100	Tyrosine	2-Amino-3-(p-hydroxyphenyl)propionic acid; 3-(p-Hydroxyphenyl)alanine; Tyrosine		C01536
206	180.066	TRUE	0.960673	852611	0.000496321	C9H11NO3	-H(-)	100	L-threo-3-Phenylserine	L-threo-3-Phenylserine		C03290
206	180.066	TRUE	0.960673	852611	0.000496321	C9H11NO3	-H(-)	100	3-Amino-3-(4-hydroxyphenyl)propanoate	3-Amino-3-(4-hydroxyphenyl)propanoate; beta-Tyrosine		C04368
206	180.066	TRUE	0.960673	852611	0.000496321	C9H11NO3	-H(-)	100	D-Tyrosine	(R)-2-Amino-3-(p-hydroxyphenyl)propionic acid; (R)-3-(p-Hydroxyphenyl)alanine; D-Tyrosine		C06420
206	180.066	TRUE	0.960673	852611	0.000496321	C9H11NO3	-H(-)	100	gamma-Hydroxy-3-pyridinebutanoate	gamma-Hydroxy-3-pyridinebutanoate		C19579
206	180.066	TRUE	0.960673	852611	0.000496321	C9H11NO3	-H(-)	100	N-Hydroxy-L-phenylalanine	2-(Hydroxyamino)-3-phenylpropanoate; N-Hydroxy-L-phenylalanine		C19712
206	180.066	TRUE	0.960673	852611	0.000496321	C9H11NO3	-H(-)	100	3-Hydroxy-L-phenylalanine	3-Hydroxy-L-phenylalanine; 3-Tyrosine		C20807
207	181.05	TRUE	0.917493	208588	0.000236801	C9H10O4	-H(-)	100	3-(4-Hydroxyphenyl)lactate	2-Hydroxy-3-(4-hydroxyphenyl)propanoate; 3-(4-Hydroxyphenyl)lactate; 4-Hydroxyphenyllactate; p-Hydroxyphenyllactate		C03672
207	181.05	TRUE	0.917493	208588	0.000236801	C9H10O4	-H(-)	100	(R)-3-(4-Hydroxyphenyl)lactate	(R)-3-(4-Hydroxyphenyl)lactate		C03964
207	181.05	TRUE	0.917493	208588	0.000236801	C9H10O4	-H(-)	100	3-(2,3-Dihydroxyphenyl)propanoate	2,3-Dihydroxyphenylpropanoate; 3-(2,3-Dihydroxyphenyl)propanoate		C04044
207	181.05	TRUE	0.917493	208588	0.000236801	C9H10O4	-H(-)	100	Homovanillate	3-Methoxy-4-hydroxyphenylacetate; Homovanillate; Homovanillic acid		C05582
207	181.05	TRUE	0.917493	208588	0.000236801	C9H10O4	-H(-)	100	3-Methoxy-4-hydroxyphenylglycolaldehyde	3-Methoxy-4-hydroxyphenylglycolaldehyde		C05583
207	181.05	TRUE	0.917493	208588	0.000236801	C9H10O4	-H(-)	100	3,4-Dihydroxyphenylpropanoate	3,4-Dihydroxyphenylpropanoate; 3,4-Dihydroxyphenylpropionic acid; Dihydrocaffeic acid		C10447
207	181.05	TRUE	0.917493	208588	0.000236801	C9H10O4	-H(-)	100	2',6'-Dihydroxy-4'-methoxyacetophenone	2',6'-Dihydroxy-4'-methoxyacetophenone; 4-O-Methylphloracetophenone		C10680
207	181.05	TRUE	0.917493	208588	0.000236801	C9H10O4	-H(-)	100	cis-3-(3-Carboxyethenyl)-3,5-cyclohexadiene-1,2-diol	(2E)-3-(cis-5,6-Dihydroxycyclohexa-1,3-dien-1-yl)prop-2-enoate; cis-3-(3-Carboxyethenyl)-3,5-cyclohexadiene-1,2-diol		C12622
208	181.071	TRUE	0.919935	442088	0.00033165	C6H14O6	-H(-)	100	Mannitol	D-Mannitol; Mannitol		C00392
208	181.071	TRUE	0.919935	442088	0.00033165	C6H14O6	-H(-)	100	D-Sorbitol	D-Glucitol; D-Sorbitol; L-Gulitol; Sorbitol		C00794
208	181.071	TRUE	0.919935	442088	0.00033165	C6H14O6	-H(-)	100	D-Iditol	D-Iditol		C01489
208	181.071	TRUE	0.919935	442088	0.00033165	C6H14O6	-H(-)	100	L-Iditol	L-Iditol		C01507
208	181.071	TRUE	0.919935	442088	0.00033165	C6H14O6	-H(-)	100	Galactitol	Dulcitol; Dulcose; Galactitol		C01697
208	181.071	TRUE	0.919935	442088	0.00033165	C6H14O6	-H(-)	100	L-Glucitol	D-Gulitol; L-Glucitol; L-Sorbitol		C01722
209	182.118	TRUE	0.684889	4413.15	0.000199126	C10H17NO2	-H(-)	100	Acetyltropine	3-Acetyltropine; Acetyltropine		C12452
209	182.118	TRUE	0.684889	4413.15	0.000199126	C10H17NO2	-H(-)	100	Acetylpseudotropine	Acetylpseudotropine		C12453
210	182.993	TRUE	0.771206	41077.8	0.000551101	C7H4O6	-H(-)	100	2-Pyrone-4,6-dicarboxylate	2-Pyrone-4,6-dicarboxylate		C03671
210	182.993	TRUE	0.771206	41077.8	0.000551101	C7H4O6	-H(-)	100	Chelidonic acid	4-Oxo-4H-pyran-2,6-dicarboxylic acid; Chelidonic acid		C08476
211	183.006	TRUE	0.306704	43584	0.000386481	C4H9O6P	-H(-)	100	L-3,4-Dihydroxybutan-2-one 4-phosphate	1-Deoxy-L-glycero-tetrulose 4-phosphate; 2-Hydroxy-3-oxobutyl phosphate; L-3,4-Dihydroxybutan-2-one 4-phosphate		C15556
212	183.045	TRUE	0.893596	9239.15	-0.000106898	C12H8O2	-H(-)	100	Dibenzo-p-dioxin	Dibenzo-p-dioxin		C07732
212	183.045	TRUE	0.893596	9239.15	-0.000106898	C12H8O2	-H(-)	100	2-Hydroxydibenzofuran	2-Hydroxydibenzofuran; Dibenzofuran-2-ol		C14409
213	183.056	TRUE	0.834781	8575.96	0.000522399	C11H8N2O	-H(-)	100	Fuberidazole	Fuberidazole		C18737
214	183.066	TRUE	0.614046	11444.9	4.80901e-05	C9H12O4	-H(-)	100	7-Methyl-2-hydroxy-6-oxoocta-2,4-dienoate	7-Methyl-2-hydroxy-6-oxoocta-2,4-dienoate		C04535
214	183.066	TRUE	0.614046	11444.9	4.80901e-05	C9H12O4	-H(-)	100	3-Methoxy-4-hydroxyphenylethyleneglycol	3-Methoxy-4-hydroxyphenylethyleneglycol		C05594
214	183.066	TRUE	0.614046	11444.9	4.80901e-05	C9H12O4	-H(-)	100	2-Hydroxy-6-oxo-7-methylocta-2,4-dienoate	2-Hydroxy-6-oxo-7-methylocta-2,4-dienoate		C06582
214	183.066	TRUE	0.614046	11444.9	4.80901e-05	C9H12O4	-H(-)	100	Antiarol	3,4,5-Trimethoxyphenol; Antiarol		C10765
214	183.066	TRUE	0.614046	11444.9	4.80901e-05	C9H12O4	-H(-)	100	cis-3-(1-Carboxy-ethyl)-3,5-cyclo-hexadiene-1,2-diol	cis-3-(1-Carboxy-ethyl)-3,5-cyclo-hexadiene-1,2-diol		C11456
214	183.066	TRUE	0.614046	11444.9	4.80901e-05	C9H12O4	-H(-)	100	cis-3-(Carboxy-ethyl)-3,5-cyclo-hexadiene-1,2-diol	3-(cis-5,6-Dihydroxycyclohexa-1,3-dien-1-yl)propanoate; cis-3-(2-Carboxy-ethyl)-3,5-cyclo-hexadiene-1,2-diol; cis-3-(Carboxy-ethyl)-3,5-cyclo-hexadiene-1,2-diol		C11588
214	183.066	TRUE	0.614046	11444.9	0.00035709	C5H15NO4P	-H(-)	100	Choline phosphate	Choline phosphate; O-Phosphocholine; Phosphocholine; Phosphorylcholine		C00588
215	183.102	TRUE	0.802056	20167.3	0.000315819	C10H16O3	-H(-)	100	5-exo-Hydroxy-1,2-campholide	5-exo-Hydroxy-1,2-campholide		C03843
215	183.102	TRUE	0.802056	20167.3	0.000315819	C10H16O3	-H(-)	100	1,6,6-Trimethyl-2,7-dioxabicyclo[3.2.2]nonan-3-one	1,6,6-Trimethyl-2,7-dioxabicyclo[3.2.2]nonan-3-one		C04718
215	183.102	TRUE	0.802056	20167.3	0.000315819	C10H16O3	-H(-)	100	4,5-Dihydro-5,5-dimethyl-4-(3-oxobutyl)furan-2(3H)-one	4,5-Dihydro-5,5-dimethyl-4-(3-oxobutyl)furan-2(3H)-one		C06066
215	183.102	TRUE	0.802056	20167.3	0.000315819	C10H16O3	-H(-)	100	(3R)-3-Isopropenyl-6-oxoheptanoate	(3R)-3-Isopropenyl-6-oxoheptanoate; (3R)-3-Isopropenyl-6-oxoheptanoic acid		C11405
215	183.102	TRUE	0.802056	20167.3	0.000315819	C10H16O3	-H(-)	100	(3S)-3-Isopropenyl-6-oxoheptanoate	(3S)-3-Isopropenyl-6-oxoheptanoate; (3S)-3-Isopropenyl-6-oxoheptanoic acid		C11419
215	183.102	TRUE	0.802056	20167.3	0.000315819	C10H16O3	-H(-)	100	(4R)-7-Hydroxy-4-isopropenyl-7-methyl-2-oxo-oxepanone	(4R)-7-Hydroxy-4-isopropenyl-7-methyl-2-oxo-oxepanone; (4R)-7-Hydroxy-4-isopropenyl-7-methyloxepan-2-one		C19079
215	183.102	TRUE	0.802056	20167.3	0.000315819	C10H16O3	-H(-)	100	(4S)-7-Hydroxy-4-isopropenyl-7-methyl-2-oxo-oxepanone	(4S)-7-Hydroxy-4-isopropenyl-7-methyl-2-oxo-oxepanone; (4S)-7-Hydroxy-4-isopropenyl-7-methyloxepan-2-one		C19084
215	183.102	TRUE	0.802056	20167.3	0.000315819	C10H16O3	-H(-)	100	[(1S)-4-Hydroxy-2,2,3-trimethylcyclopent-3-enyl]acetate	[(1S)-4-Hydroxy-2,2,3-trimethylcyclopent-3-enyl]acetate		C20324
216	183.139	TRUE	0.802964	14729.3	-0.000245733	C11H20O2	-H(-)	100	Citronellyl formate	Citronellyl formate		C12295
216	183.139	TRUE	0.802964	14729.3	-0.000245733	C11H20O2	-H(-)	100	11-Undecanolactone	11-Undecanolactone		C13823
216	183.139	TRUE	0.802964	14729.3	-0.000245733	C11H20O2	-H(-)	100	Undecylenic acid	Undecenoic acid; Undecylenic acid		C13910
216	183.139	TRUE	0.802964	14729.3	-0.000245733	C11H20O2	-H(-)	100	2-Ethylhexyl acrylate	2-Ethylhexyl acrylate		C19420
217	184.002	TRUE	0.906155	121622	4.52939e-05	C3H8NO6P	-H(-)	100	O-Phospho-L-serine	3-Phosphoserine; Dexfosfoserine; L-O-Phosphoserine; O-Phospho-L-serine		C01005
217	184.002	TRUE	0.906155	121622	4.52939e-05	C3H8NO6P	-H(-)	100	O-Phospho-D-serine	D-O-Phosphoserine; O-Phospho-D-serine		C02532
218	184.097	TRUE	0.837074	9941.74	0.000514995	C9H15NO3	-H(-)	100	Otonecine	(1R,4beta,7abeta)-2,3,5,7a-Tetrahydro-1,7a-dihydroxy-7-(hydroxymethyl)-4-methyl-1H-pyrrolizin-4-ium; Otonecine		C10356
218	184.097	TRUE	0.837074	9941.74	0.000514995	C9H15NO3	-H(-)	100	Ecgonine	Ecgonine		C10858
218	184.097	TRUE	0.837074	9941.74	0.000514995	C9H15NO3	-H(-)	100	Pseudoecgonine	Pseudoecgonine		C12449
218	184.097	TRUE	0.837074	9941.74	0.000514995	C9H15NO3	-H(-)	100	N-Isovaleryl-L-homoserine lactone	N-Isovaleryl-L-homoserine lactone		C20673
219	184.99	TRUE	0.845483	28204.9	0.000975678	C7H6O4S	-H(-)	100	4-Sulfobenzaldehyde	4-Formylbenzenesulfonate; 4-Sulfobenzaldehyde		C06679
220	185.057	TRUE	0.959244	271200	0.000241143	C7H10N2O4	-H(-)	100	AMPA	AMPA; alpha-Amino-3-hydroxy-5-methyl-4-isoxazolepropionic acid		C13672
221	185.154	TRUE	0.00326066	18569.3	0.000461609	C11H22O2	-H(-)	100	Undecanoic acid	Hendecanoic acid; Undecanoic acid		C17715
222	186.077	TRUE	0.919809	53535.9	0.000351337	C8H13NO4	-H(-)	100	6-Acetamido-3-oxohexanoate	6-Acetamido-3-oxohexanoate		C03682
222	186.077	TRUE	0.919809	53535.9	0.000351337	C8H13NO4	-H(-)	100	6-Acetamido-2-oxohexanoate	2-Oxo-6-acetamidocaproate; 6-Acetamido-2-oxohexanoate		C05548
222	186.077	TRUE	0.919809	53535.9	0.000351337	C8H13NO4	-H(-)	100	N-(3-(S)-Hydroxybutyryl)homoserine lactone	N-(3-(S)-Hydroxybutyryl)homoserine lactone		C11842
222	186.077	TRUE	0.919809	53535.9	0.000351337	C8H13NO4	-H(-)	100	N2-Acetyl-L-aminoadipate semialdehyde	N2-Acetyl-L-aminoadipate semialdehyde		C12988
223	186.113	TRUE	0.799591	18935.6	0.000175365	C9H17NO3	-H(-)	100	8-Amino-7-oxononanoate	8-Amino-7-oxononanoate; 8-Amino-7-oxononanoic acid		C01092
223	186.113	TRUE	0.799591	18935.6	0.000175365	C9H17NO3	-H(-)	100	(E)-2-Butenyl-4-methyl-threonine	(E)-2-Butenyl-4-methyl-threonine; 2-Butenyl-4-methylthreonine		C12029
224	187.097	TRUE	0.889289	64511.2	0.00016067	C9H16O4	-H(-)	100	Azelaic acid	1,7-Heptanedicarboxylic acid; Azelaic acid; Nonanedioic acid		C08261
224	187.097	TRUE	0.889289	64511.2	0.00016067	C9H16O4	-H(-)	100	Eucommiol	Eucommiol		C17878
225	187.108	TRUE	0.837341	882728	0.000324679	C8H16N2O3	-H(-)	100	Glycyl-leucine	Glycyl-L-leucine; Glycyl-leucine		C02155
225	187.108	TRUE	0.837341	882728	0.000324679	C8H16N2O3	-H(-)	100	N6-Acetyl-L-lysine	N6-Acetyl-L-lysine		C02727
225	187.108	TRUE	0.837341	882728	0.000324679	C8H16N2O3	-H(-)	100	6-Acetamido-3-aminohexanoate	6-Acetamido-3-aminohexanoate		C03846
225	187.108	TRUE	0.837341	882728	0.000324679	C8H16N2O3	-H(-)	100	N2-Acetyl-L-lysine	N(alpha)-Acetyllysine; N2-Acetyl-L-lysine		C12989
226	188.002	TRUE	0.709329	6484.16	0.000634549	C6H7NO4S	-H(-)	100	2-Pyridyl hydroxymethane sulfonic acid	2-Pyridyl hydroxymethane sulfonic acid		C11327
227	188.035	TRUE	0.76749	12341.5	0.000496883	C10H7NO3	-H(-)	100	4-Hydroxy-2-quinolinecarboxylic acid	4-Hydroxy-2-quinolinecarboxylic acid; Kynurenate; Kynurenic acid		C01717
227	188.035	TRUE	0.76749	12341.5	0.000496883	C10H7NO3	-H(-)	100	N-Acetylisatin	1-Acetylisatin; N-Acetylisatin		C02172
227	188.035	TRUE	0.76749	12341.5	0.000496883	C10H7NO3	-H(-)	100	1-Nitronaphthalene-5,6-oxide	1-Nitronaphthalene-5,6-oxide		C14800
227	188.035	TRUE	0.76749	12341.5	0.000496883	C10H7NO3	-H(-)	100	1-Nitronaphthalene-7,8-oxide	1-Nitronaphthalene-7,8-oxide		C14802
227	188.035	TRUE	0.76749	12341.5	0.000496883	C10H7NO3	-H(-)	100	2-Oxo-1,2-dihydroquinoline-4-carboxylate	2-Oxo-1,2-dihydroquinoline-4-carboxylate		C16715
227	188.035	TRUE	0.76749	12341.5	0.000496883	C10H7NO3	-H(-)	100	3-Hydroxyquinaldic acid	3-Hydroxyquinaldic acid		C18621
228	188.056	TRUE	0.923597	92556.2	0.000210415	C7H11NO5	-H(-)	100	N-Acetyl-L-glutamate	N-Acetyl-L-glutamate; N-Acetyl-L-glutamic acid		C00624
228	188.056	TRUE	0.923597	92556.2	0.000210415	C7H11NO5	-H(-)	100	L-2-Amino-6-oxoheptanedioate	L-2-Amino-6-oxoheptanedioate; L-2-Amino-6-oxopimelate		C03871
228	188.056	TRUE	0.923597	92556.2	0.000210415	C7H11NO5	-H(-)	100	AminoDHQ	5-Deoxy-5-amino-3-dehydroquinic acid; AminoDHQ		C12109
229	188.093	TRUE	0.900304	78769.8	0.000222895	C8H15NO4	-H(-)	100	Castanospermine	Castanospermine		C02256
229	188.093	TRUE	0.900304	78769.8	0.000222895	C8H15NO4	-H(-)	100	(2S)-2-{[1-(R)-Carboxyethyl]amino}pentanoate	(2S)-2-{[1-(R)-Carboxyethyl]amino}pentanoate		C06326
229	188.093	TRUE	0.900304	78769.8	0.000222895	C8H15NO4	-H(-)	100	Alexine	Alexine		C10124
229	188.093	TRUE	0.900304	78769.8	0.000222895	C8H15NO4	-H(-)	100	Australine	Australine		C10132
229	188.093	TRUE	0.900304	78769.8	0.000222895	C8H15NO4	-H(-)	100	2 -(Butylamido)-4-hydroxybutanoic acid	2 -(Butylamido)-4-hydroxybutanoic acid		C11843
230	188.112	TRUE	0.84589	86120.1	-0.000137243	C9H19NOS	-H(-)	100	EPTC	EPTC; S-Ethyl dipropylthiocarbamate		C11081
230	188.112	TRUE	0.84589	86120.1	-0.000137243	C9H19NOS	-H(-)	100	8-Methylthiooctanaldoxime	8-Methylthiooctanaldoxime		C17251
230	188.112	TRUE	0.84589	86120.1	9.16384e-05	C8H16N2O3	-H(-) [+1]	68	Glycyl-leucine	Glycyl-L-leucine; Glycyl-leucine		C02155
230	188.112	TRUE	0.84589	86120.1	9.16384e-05	C8H16N2O3	-H(-) [+1]	68	N6-Acetyl-L-lysine	N6-Acetyl-L-lysine		C02727
230	188.112	TRUE	0.84589	86120.1	9.16384e-05	C8H16N2O3	-H(-) [+1]	68	6-Acetamido-3-aminohexanoate	6-Acetamido-3-aminohexanoate		C03846
230	188.112	TRUE	0.84589	86120.1	9.16384e-05	C8H16N2O3	-H(-) [+1]	68	N2-Acetyl-L-lysine	N(alpha)-Acetyllysine; N2-Acetyl-L-lysine		C12989
231	188.986	TRUE	0.567437	50211.6	0.000630304	C6H6O5S	-H(-)	100	3-Sulfocatechol	2,3-Dihydroxybenzenesulfonate; 3-Sulfocatechol		C06336
231	188.986	TRUE	0.567437	50211.6	0.000630304	C6H6O5S	-H(-)	100	4-Sulfocatechol	4-Sulfocatechol		C06674
232	189.004	TRUE	0.699806	19655.7	-0.000212921	C6H6O7	-H(-)	100	Oxalosuccinate	Oxalosuccinate; Oxalosuccinic acid		C05379
233	189.04	TRUE	0.806807	18203.7	0.000227711	C7H10O6	-H(-)	100	3-Dehydroquinate	3-Dehydroquinate; 3-Dehydroquinic acid; 5-Dehydroquinate; 5-Dehydroquinic acid		C00944
233	189.04	TRUE	0.806807	18203.7	0.000227711	C7H10O6	-H(-)	100	4-Hydroxy-4-methyl-2-oxoadipate	4-Hydroxy-4-methyl-2-oxoadipate		C04049
233	189.04	TRUE	0.806807	18203.7	0.000227711	C7H10O6	-H(-)	100	4-Hydroxy-2-oxo-heptanedioate	4-Hydroxy-2-ketopimelate; 4-Hydroxy-2-oxo-heptanedioate; 4-Hydroxy-2-oxoheptanedioate; 4-Hydroxy-2-oxoheptanedioic acid		C05601
233	189.04	TRUE	0.806807	18203.7	0.000227711	C7H10O6	-H(-)	100	2,4-Dihydroxyhept-2-enedioate	2,4-Dihydroxyhept-2-1,7-dioate; 2,4-Dihydroxyhept-2-enedioate; 2,4-Dihydroxyhept-2-enedioic acid		C06201
234	189.051	TRUE	0.916921	47908.4	0.000610104	C6H10N2O5	-H(-)	100	N-Carbamyl-L-glutamate	Carglumic acid; N-Carbamyl-L-glutamate		C05829
234	189.051	TRUE	0.916921	47908.4	0.000610104	C6H10N2O5	-H(-)	100	L-alpha-Amino-gamma-oxalylaminobutyric acid	L-alpha-Amino-gamma-oxalylaminobutyric acid		C08266
235	189.077	TRUE	0.737749	51098.9	9.62352e-05	C8H14O5	-H(-)	100	(R)-3-((R)-3-Hydroxybutanoyloxy)butanoate	(R)-3-((R)-3-Hydroxybutanoyloxy)butanoate		C04546
236	189.088	TRUE	0.793391	86152.9	2.95027e-05	C7H14N2O4	-H(-)	100	LL-2,6-Diaminoheptanedioate	LL-2,6-Diaminoheptanedioate; LL-2,6-Diaminopimelate; LL-2,6-Diaminopimelic acid		C00666
236	189.088	TRUE	0.793391	86152.9	2.95027e-05	C7H14N2O4	-H(-)	100	meso-2,6-Diaminoheptanedioate	meso-2,6-Diaminoheptanedioate; meso-2,6-Diaminopimelate; meso-2,6-Diaminopimelic acid; meso-Diaminoheptanedioate		C00680
237	190.054	TRUE	0.862785	48591.6	0.000436996	C7H13NO3S	-H(-)	100	N-Acetylmethionine	N-Acetyl-L-methionine; N-Acetylmethionine		C02712
238	190.071	TRUE	0.903225	28715.9	0.000633155	C7H13NO5	-H(-)	100	2-Amino-3,7-dideoxy-D-threo-hept-6-ulosonic acid	2-Amino-3,7-dideoxy-D-threo-hept-6-ulosonic acid		C16850
239	190.088	TRUE	0.814171	15554.4	-0.000817007	C11H13NO2	-H(-)	100	Ephedroxane	Ephedroxane		C17902
240	191.02	TRUE	0.685407	908872	2.68389e-05	C6H8O7	-H(-)	100	Citrate	2-Hydroxy-1,2,3-propanetricarboxylic acid; 2-Hydroxytricarballylic acid; Citrate; Citric acid		C00158
240	191.02	TRUE	0.685407	908872	2.68389e-05	C6H8O7	-H(-)	100	Isocitrate	1-Hydroxypropane-1,2,3-tricarboxylic acid; 1-Hydroxytricarballylic acid; Isocitrate; Isocitric acid		C00311
240	191.02	TRUE	0.685407	908872	2.68389e-05	C6H8O7	-H(-)	100	(1R,2S)-1-Hydroxypropane-1,2,3-tricarboxylate	(1R,2S)-1-Hydroxypropane-1,2,3-tricarboxylate; D-threo-Isocitric acid		C00451
240	191.02	TRUE	0.685407	908872	2.68389e-05	C6H8O7	-H(-)	100	5-Dehydro-4-deoxy-D-glucarate	5-Dehydro-4-deoxy-D-glucarate		C00679
240	191.02	TRUE	0.685407	908872	2.68389e-05	C6H8O7	-H(-)	100	2,5-Didehydro-D-gluconate	2,5-Didehydro-D-gluconate; 2,5-Diketogluconic acid		C02780
240	191.02	TRUE	0.685407	908872	2.68389e-05	C6H8O7	-H(-)	100	Carboxymethyloxysuccinate	(Carboxymethoxy) succinic acid; Carboxymethyloxysuccinate		C03600
240	191.02	TRUE	0.685407	908872	2.68389e-05	C6H8O7	-H(-)	100	2-Dehydro-3-deoxy-D-glucarate	2-Dehydro-3-deoxy-D-glucarate		C03921
240	191.02	TRUE	0.685407	908872	2.68389e-05	C6H8O7	-H(-)	100	(4R,5S)-4,5,6-Trihydroxy-2,3-dioxohexanoate	(4R,5S)-4,5,6-Trihydroxy-2,3-dioxohexanoate; 2,3-Diketo-L-gulonate		C04575
240	191.02	TRUE	0.685407	908872	2.68389e-05	C6H8O7	-H(-)	100	(1S,2S)-1-Hydroxypropane-1,2,3-tricarboxylate	(1S,2S)-1-Hydroxypropane-1,2,3-tricarboxylate; D-erythro-Isocitric acid		C04617
240	191.02	TRUE	0.685407	908872	2.68389e-05	C6H8O7.	-H(-)	100	Citric acid monohydrate	Citric acid monohydrate		C12649
241	192.067	TRUE	0.846272	43115.8	-0.000197654	C10H11NO3	-H(-)	100	(3-Arylcarbonyl)-alanine	(3-Arylcarbonyl)-alanine		C03450
241	192.067	TRUE	0.846272	43115.8	-0.000197654	C10H11NO3	-H(-)	100	Phenylacetylglycine	Phenylacetylglycine		C05598
241	192.067	TRUE	0.846272	43115.8	-0.000197654	C10H11NO3	-H(-)	100	5,6-Dihydroxy-3-methyl-2-oxo-1,2,5,6-tetrahydroquinoline	5,6-Dihydroxy-3-methyl-2-oxo-1,2,5,6-tetrahydroquinoline		C06726
241	192.067	TRUE	0.846272	43115.8	-0.000197654	C10H11NO3	-H(-)	100	Gentioflavine	Gentioflavine		C09962
241	192.067	TRUE	0.846272	43115.8	-0.000197654	C10H11NO3	-H(-)	100	Cichorine	Cichorine		C10581
241	192.067	TRUE	0.846272	43115.8	-0.000197654	C10H11NO3	-H(-)	100	3-Carbamoyl-2-phenylpropionaldehyde	3-Carbamoyl-2-phenylpropionaldehyde		C16587
241	192.067	TRUE	0.846272	43115.8	-0.000197654	C10H11NO3	-H(-)	100	4-Hydroxy-5-phenyltetrahydro-1,3-oxazin-2-one	4-Hydroxy-5-phenyltetrahydro-1,3-oxazin-2-one		C16595
242	193.035	TRUE	0.924662	72939.8	0.00015293	C6H10O7	-H(-)	100	D-Glucuronate	D-Glucuronate; Glucuronate; Glucuronic acid		C00191
242	193.035	TRUE	0.924662	72939.8	0.00015293	C6H10O7	-H(-)	100	D-Galacturonate	D-Galacturonate; D-Galacturonic acid		C00333
242	193.035	TRUE	0.924662	72939.8	0.00015293	C6H10O7	-H(-)	100	D-Tagaturonate	D-Tagaturonate; D-Tagaturonic acid		C00558
242	193.035	TRUE	0.924662	72939.8	0.00015293	C6H10O7	-H(-)	100	3-Dehydro-L-gulonate	3-Dehydro-L-gulonate		C00618
242	193.035	TRUE	0.924662	72939.8	0.00015293	C6H10O7	-H(-)	100	D-Fructuronate	D-Fructuronate; D-Fructuronic acid		C00905
242	193.035	TRUE	0.924662	72939.8	0.00015293	C6H10O7	-H(-)	100	5-Dehydro-D-gluconate	5-Dehydro-D-gluconate; 5-Dehydrogluconate		C01062
242	193.035	TRUE	0.924662	72939.8	0.00015293	C6H10O7	-H(-)	100	D-Mannuronate	D-Mannuronate; D-Mannuronic acid		C02024
242	193.035	TRUE	0.924662	72939.8	0.00015293	C6H10O7	-H(-)	100	2-Dehydro-D-galactonate	2-Dehydro-D-galactonate		C03342
242	193.035	TRUE	0.924662	72939.8	0.00015293	C6H10O7	-H(-)	100	L-Iduronic acid	L-Iduronic acid		C06472
242	193.035	TRUE	0.924662	72939.8	0.00015293	C6H10O7	-H(-)	100	2-Keto-D-gluconic acid	2-Dehydro-D-gluconate; 2-Dehydro-D-gluconic acid; 2-Keto-D-gluconic acid; alpha-D-arabino-2-Hexulosonic acid		C06473
242	193.035	TRUE	0.924662	72939.8	0.00015293	C6H10O7	-H(-)	100	L-Guluronic acid	L-Guluronic acid		C06477
242	193.035	TRUE	0.924662	72939.8	0.00015293	C6H10O7	-H(-)	100	Galacturonic acid	Galacturonic acid		C08348
242	193.035	TRUE	0.924662	72939.8	0.00015293	C6H10O7	-H(-)	100	beta-D-Glucopyranuronic acid	beta-D-Glucopyranuronic acid; beta-D-Glucuronic acid		C08350
242	193.035	TRUE	0.924662	72939.8	0.00015293	C6H10O7	-H(-)	100	2-Dehydro-L-idonate	2-Dehydro-L-idonate; 2-Dehydro-L-idonic acid; 2-Keto-L-gulonate; 2-Keto-L-gulonic acid; L-Ketoidonate; L-Ketoidonic acid; L-Sorbosonate; L-Sorbosonic acid; L-xylo-Hex-2-ulosonic acid		C15673
242	193.035	TRUE	0.924662	72939.8	0.00015293	C6H10O7	-H(-)	100	D-Glucuronic acid	D-Glucuronic acid		C16245
243	193.072	TRUE	0.912476	220829	0.000191717	C7H14O6	-H(-)	100	5-O-Methyl-myo-inositol	1D-5-O-Methyl-myo-inositol; 5-O-Methyl-myo-inositol; Sequoyitol		C03365
243	193.072	TRUE	0.912476	220829	0.000191717	C7H14O6	-H(-)	100	Methyl beta-D-galactoside	Methyl beta-D-galactopyranoside; Methyl beta-D-galactoside		C03619
243	193.072	TRUE	0.912476	220829	0.000191717	C7H14O6	-H(-)	100	1-O-Methyl-myo-inositol	1-O-Methyl-myo-inositol; 1D-1-O-Methyl-myo-inositol		C03659
243	193.072	TRUE	0.912476	220829	0.000191717	C7H14O6	-H(-)	100	3-O-Methyl-myo-inositol	1D-3-O-Methyl-myo-inositol; 3-O-Methyl-myo-inositol		C03660
243	193.072	TRUE	0.912476	220829	0.000191717	C7H14O6	-H(-)	100	D-Pinitol	1D-3-O-Methyl-chiro-inositol; 5D-5-O-Methyl-chiro-inositol; D-Pinitol		C03844
243	193.072	TRUE	0.912476	220829	0.000191717	C7H14O6	-H(-)	100	O-Methyl-scyllo-inositol	1-O-Methyl-scyllo-inositol; O-Methyl-scyllo-inositol		C05163
243	193.072	TRUE	0.912476	220829	0.000191717	C7H14O6	-H(-)	100	4-O-Methyl-myo-inositol	1D-4-O-Methyl-myo-inositol; 4-O-Methyl-myo-inositol		C06352
243	193.072	TRUE	0.912476	220829	0.000191717	C7H14O6	-H(-)	100	6-O-Methyl-myo-inositol	1D-6-O-Methyl-myo-inositol; 6-O-Methyl-myo-inositol		C06353
243	193.072	TRUE	0.912476	220829	0.000191717	C7H14O6	-H(-)	100	(-)-Quebrachitol	(-)-Quebrachitol		C08257
244	193.087	TRUE	0.877811	34500.1	0.000349632	C11H14O3	-H(-)	100	Zingerone	Vanillylacetone; Zingerone; Zingiberone; [0]-Paradol		C17497
244	193.087	TRUE	0.877811	34500.1	0.000349632	C11H14O3	-H(-)	100	Isobutylparaben	Isobutyl parahydroxybenzoate; Isobutylparaben		C20342
245	194.093	TRUE	0.748601	10511.7	0.000719888	C9H13N3O2	-H(-)	100	alpha-[3-(Nitrosoamino)propyl]-3-pyridinemethanol	alpha-[3-(Nitrosoamino)propyl]-3-pyridinemethanol		C19581
246	195.05	TRUE	0.94704	1.15954e+07	0.000538666	C6H12O7	-H(-)	100	D-Gluconic acid	D-Gluconate; D-Gluconic acid; D-gluco-Hexonic acid		C00257
246	195.05	TRUE	0.94704	1.15954e+07	0.000538666	C6H12O7	-H(-)	100	D-Mannonate	D-Mannonate		C00514
246	195.05	TRUE	0.94704	1.15954e+07	0.000538666	C6H12O7	-H(-)	100	L-Idonate	L-Idonate		C00770
246	195.05	TRUE	0.94704	1.15954e+07	0.000538666	C6H12O7	-H(-)	100	L-Gulonate	Gulonate; Gulonic acid; L-Gulonate; L-Gulonic acid		C00800
246	195.05	TRUE	0.94704	1.15954e+07	0.000538666	C6H12O7	-H(-)	100	D-Altronate	D-Altronate		C00817
246	195.05	TRUE	0.94704	1.15954e+07	0.000538666	C6H12O7	-H(-)	100	D-Galactonate	D-Galactonate; D-Galactonic acid		C00880
246	195.05	TRUE	0.94704	1.15954e+07	0.000538666	C6H12O7	-H(-)	100	2-Carboxy-D-arabinitol	2-Carboxy-D-arabinitol		C03215
246	195.05	TRUE	0.94704	1.15954e+07	0.000538666	C6H12O7	-H(-)	100	L-Galactonate	L-Galactonate; L-Galactonic acid		C15930
247	195.066	TRUE	0.673244	1.6615e+06	0.000284364	C10H12O4	-H(-)	87	2,3-Dihydroxy-p-cumate	2,3-Dihydroxy-p-cumate		C06580
247	195.066	TRUE	0.673244	1.6615e+06	0.000284364	C10H12O4	-H(-)	87	Phlorisobutyrophenone	2-Methyl-1-(2,4,6-trihydroxyphenyl)-1-propanone; Phlorisobutyrophenone		C07351
247	195.066	TRUE	0.673244	1.6615e+06	0.000284364	C10H12O4	-H(-)	87	Acetosyringone	Acetosyringone		C10664
247	195.066	TRUE	0.673244	1.6615e+06	0.000284364	C10H12O4	-H(-)	87	2',6'-Dimethoxy-4'-hydroxyacetophenone	2',6'-Dimethoxy-4'-hydroxyacetophenone		C10684
247	195.066	TRUE	0.673244	1.6615e+06	0.000284364	C10H12O4	-H(-)	87	Xanthoxylin	Xanthoxylin		C10726
247	195.066	TRUE	0.673244	1.6615e+06	0.000284364	C10H12O4	-H(-)	87	5-Hydroxyconiferyl alcohol	5-Hydroxyconiferyl alcohol		C12205
247	195.066	TRUE	0.673244	1.6615e+06	0.000284364	C10H12O4	-H(-)	87	Cantharidin	Cantharidin		C16778
247	195.066	TRUE	0.673244	1.6615e+06	0.000284364	C10H12O4	-H(-)	87	Paeonilactone B	Paeonilactone B		C17455
248	195.114	TRUE	0.87792	693478	0.000382709	C10H16N2O2	-H(-)	89	Fasoracetam	Fasoracetam; NS 105		C13311
249	197.01	TRUE	0.773065	39955.1	-0.0007411	C8H6O6	-H(-)	100	3,4-Dihydroxyphthalate	3,4-Dihydroxyphthalate; 3,4-Dihydroxyphthalic acid		C03223
249	197.01	TRUE	0.773065	39955.1	-0.0007411	C8H6O6	-H(-)	100	4,5-Dihydroxyphthalate	4,5-Dihydroxyphthalate; 4,5-Dihydroxyphthalic acid		C03233
250	197.021	TRUE	0.829908	25900.6	-0.000975273	C7H6N2O5	-H(-)	100	DNOC	2,4-Dinitro-6-methylphenol; 4,6-Dinitro-o-cresol; DNOC		C18653
251	197.096	TRUE	0.921319	20769.1	0.00121513	C14H14O	-H(-)	71	4-Phenethylphenol	4-(2-Phenylethyl)phenol; 4-Phenethylphenol		C14340
252	197.129	TRUE	0.849555	62385.8	0.000328292	C10H18N2O2	-H(-)	100	Slaframine	(-)-Slaframine; Slaframine		C06185
253	198.018	TRUE	0.732251	10625.9	-0.000714419	C4H10NO6P	-H(-)	100	O-Phospho-L-homoserine	O-Phospho-L-homoserine		C01102
253	198.018	TRUE	0.732251	10625.9	-0.000714419	C4H10NO6P	-H(-)	100	O-Phosphorylhomoserine	O-Phosphorylhomoserine		C05702
253	198.018	TRUE	0.732251	10625.9	-0.000714419	C4H10NO6P	-H(-)	100	L-Threonine O-3-phosphate	L-Threonine O-3-phosphate; L-Threonine phosphate; O-Phospho-L-threonine		C12147
253	198.018	TRUE	0.732251	10625.9	-0.000714419	C4H10NO6P	-H(-)	100	Iminoerythrose 4-phosphate	Imino-D-erythrose 4-phosphate; Iminoerythrose 4-phosphate		C12215
254	198.088	TRUE	0.880677	16953.8	0.000246876	C8H13N3O3	-H(-)	100	gamma-Glutamyl-beta-aminopropiononitrile	gamma-Glutamyl-3-aminopropiononitrile; gamma-Glutamyl-beta-aminopropiononitrile		C06114
255	199.072	TRUE	0.934044	98518.9	0.000245653	C8H12N2O4	-H(-)	100	Dihydroclavaminic acid	Dihydroclavaminate; Dihydroclavaminic acid		C06659
255	199.072	TRUE	0.934044	98518.9	0.000245653	C8H12N2O4	-H(-)	100	Alanylclavam	Alanylclavam		C17360
256	199.17	TRUE	0.481723	49721.1	0.00038903	C12H24O2	-H(-)	100	Dodecanoic acid	Dodecanoate; Dodecanoic acid; Dodecylcarboxylate; Lauric acid		C02679
257	199.969	TRUE	0.864186	11898.8	0.000349029	C3H7NO5S2	-H(-)	100	S-Sulfo-L-cysteine	S-Sulfo-L-cysteine		C05824
258	200.073	TRUE	0.840268	20982.4	-0.00101785	C12H11NO2	-H(-)	97	Carbaryl	Carbaril; Carbaryl		C07491
258	200.073	TRUE	0.840268	20982.4	-0.00101785	C12H11NO2	-H(-)	97	2'-Aminobiphenyl-2,3-diol	2'-Aminobiphenyl-2,3-diol		C08061
258	200.073	TRUE	0.840268	20982.4	-0.00101785	C12H11NO2	-H(-)	97	Fenfuram	Fenfuram		C18833
259	201.087	TRUE	0.860733	53007.9	0.000816249	C8H14N2O4	-H(-)	100	Proclavaminic acid	Proclavaminate; Proclavaminic acid		C06658
259	201.087	TRUE	0.860733	53007.9	0.000816249	C8H14N2O4	-H(-)	100	Coprine	Coprine; N(5)-(1-Hydroxycyclopropyl)-L-glutamine		C08271
260	201.112	TRUE	0.847812	61122.4	0.00097325	C10H18O4	-H(-)	100	Sebacic acid	Decanedioic acid; Sebacic acid		C08277
260	201.112	TRUE	0.847812	61122.4	0.00097325	C10H18O4	-H(-)	100	Diethyl adipate	Diethyl adipate; Diethyl hexanedioate		C14566
260	201.112	TRUE	0.847812	61122.4	0.00097325	C10H18O4	-H(-)	100	Dimethyl suberate	Dimethyl suberate; Octanedioic acid dimethyl		C17803
261	203.056	TRUE	0.795989	55245.9	-0.000119211	C8H12O6	-H(-)	100	3-O-Ethyl-L-ascorbic acid	3-O-Ethyl-L-ascorbic acid; L-Ascorbic acid ethyl ester		C18342
262	203.082	TRUE	0.947396	769669	0.000143985	C11H12N2O2	-H(-)	100	L-Tryptophan	(S)-alpha-Amino-beta-(3-indolyl)-propionic acid; L-Tryptophan; Tryptophan		C00078
262	203.082	TRUE	0.947396	769669	0.000143985	C11H12N2O2	-H(-)	100	D-Tryptophan	D-Tryptophan		C00525
262	203.082	TRUE	0.947396	769669	0.000143985	C11H12N2O2	-H(-)	100	Tryptophan	Tryptophan; alpha-Amino-beta-(3-indolyl)-propionic acid		C00806
262	203.082	TRUE	0.947396	769669	0.000143985	C11H12N2O2	-H(-)	100	Ethotoin	Ethotoin		C07839
262	203.082	TRUE	0.947396	769669	0.000143985	C11H12N2O2	-H(-)	100	Idazoxan	Idazoxan		C10968
262	203.082	TRUE	0.947396	769669	0.000143985	C11H12N2O2	-H(-)	100	Nirvanol	Nirvanol		C14916
263	204.053	TRUE	0.8928	12406.8	-0.00110322	C8H15NOS2	-H(-)	85	Lipoamide	Lipoamide; Thioctic acid amide		C00248
264	204.066	TRUE	0.92182	115761	0.000159697	C11H11NO3	-H(-)	100	Indolelactate	Indolelactate		C02043
264	204.066	TRUE	0.92182	115761	0.000159697	C11H11NO3	-H(-)	100	5-Methoxyindoleacetate	5-Methoxyindoleacetate; 5-Methoxyindoleacetic acid		C05660
264	204.066	TRUE	0.92182	115761	0.000159697	C11H11NO3	-H(-)	100	Gentianamine	Gentianamine		C09961
264	204.066	TRUE	0.92182	115761	0.000159697	C11H11NO3	-H(-)	100	Swietenidin B	Swietenidin B		C10741
265	204.124	TRUE	0.842939	16590.6	0.000579719	C9H19NO4	-H(-)	100	Pantothenol	(+)-Panthenol; (R)-2,4-Dihydroxy-N-(3-hydroxypropyl)-3,3-dimethylbutanamide; 2,4-Dihydroxy-N-(3-hydroxypropyl)-3,3-dimethylbutanamide; Bepanthen; Bepanthene; Bepantol; Cozyme; D(+)-Panthenol; D(+)-Pantothenyl alcohol; D-(+)-2,4-Dihydroxy-N-(3-hydroxypropyl)-3,3-dimethylbutyramide; D-P-A Injection; D-Panthenol; Dexpanthenol; Ilopan; Motilyn; N-Pantoyl-propanolamine; Panadon; Panthenol; Panthoderm;…		C05944
266	205.035	TRUE	0.795346	68128.7	0.000264755	C7H10O7	-H(-)	100	(R)-2-Hydroxybutane-1,2,4-tricarboxylate	(R)-2-Hydroxy-1,2,4-butanetricarboxylic acid; (R)-2-Hydroxybutane-1,2,4-tricarboxylate; 3-Hydroxy-3-carboxyadipic acid; Homocitrate; Homocitric acid		C01251
266	205.035	TRUE	0.795346	68128.7	0.000264755	C7H10O7	-H(-)	100	2-Methylcitrate	(2R,3S)-2-Hydroxybutane-1,2,3-tricarboxylate; 2-Hydroxybutane-1,2,3-tricarboxylate; 2-Methylcitrate		C02225
266	205.035	TRUE	0.795346	68128.7	0.000264755	C7H10O7	-H(-)	100	(2S,3R)-3-Hydroxybutane-1,2,3-tricarboxylate	(2S,3R)-3-Hydroxybutane-1,2,3-tricarboxylate; Methylisocitrate; Methylisocitric acid		C04593
266	205.035	TRUE	0.795346	68128.7	0.000264755	C7H10O7	-H(-)	100	Homoisocitrate	(-)-1-Hydroxy-1,2,4-butanetricarboxylate; (-)-threo-Homoisocitrate; (1R,2S)-1-Hydroxybutane-1,2,4-tricarboxylate; 3-Carboxy-2-hydroxyadipate; Homoisocitrate		C05662
267	206.05	TRUE	0.895046	31246.6	-0.000266189	C7H13NO4S	-H(-)	100	S-(2-Hydroxyethyl)-N-acetyl-L-cysteine	S-(2-Hydroxyethyl)-N-acetyl-L-cysteine		C14876
268	206.082	TRUE	0.880237	47087.6	-1.15855e-05	C11H13NO3	-H(-)	100	N-Acetyl-L-phenylalanine	N-Acetyl-L-phenylalanine		C03519
268	206.082	TRUE	0.880237	47087.6	-1.15855e-05	C11H13NO3	-H(-)	100	N-Acetyl-D-phenylalanine	N-Acetyl-D-phenylalanine		C05620
268	206.082	TRUE	0.880237	47087.6	-1.15855e-05	C11H13NO3	-H(-)	100	Cantleyine	Cantleyine		C09933
268	206.082	TRUE	0.880237	47087.6	-1.15855e-05	C11H13NO3	-H(-)	100	Rhexifoline	Rhexifoline		C09986
268	206.082	TRUE	0.880237	47087.6	-1.15855e-05	C11H13NO3	-H(-)	100	Methylone	2-(Methylamino)-1-(1,3-benzodioxol-5-yl)-1-propanone; Methylone		C20126
269	206.129	TRUE	0.726927	3970.78	0.000528105	C11H17N3O	-H(-)	100	Arenaine	Arenaine		C09912
269	206.129	TRUE	0.726927	3970.78	0.000528105	C11H17N3O	-H(-)	100	Alchornine	Alchornine		C10567
270	207.139	TRUE	0.505745	25024.3	0.000420218	C13H20O2	-H(-)	100	4-Heptyloxyphenol	4-Heptyloxyphenol; p-n-Heptyloxyphenol		C14236
271	207.15	TRUE	0.494313	4396.56	6.44064e-05	C12H20N2O	-H(-)	100	Ammodendrine	Ammodendrine; Spherocarpine		C10125
272	208.108	TRUE	0.728553	12615	0.000648063	C10H15N3O2	-H(-)	100	4-(Methylnitrosamino)-1-(3-pyridyl)-1-butanol	4-(Methylnitrosamino)-1-(3-pyridyl)-1-butanol; NNAL		C19574
273	209.03	TRUE	0.906554	35194.3	8.01178e-05	C6H10O8	-H(-)	100	D-Glucarate	D-Glucarate; D-Glucaric acid; D-Glucosaccharic acid; D-Saccharic acid; Glucarate; Glucaric acid; L-Gularic acid		C00818
273	209.03	TRUE	0.906554	35194.3	8.01178e-05	C6H10O8	-H(-)	100	D-Galactarate	D-Galactarate; D-Galactaric acid; D-Mucic acid; Galactarate; Galactaric acid; Mucic acid		C00879
274	209.045	TRUE	0.820231	15652.3	6.33245e-05	C10H10O5	-H(-)	100	5-Hydroxyferulic acid methyl ester	5-Hydroxyferulic acid methyl ester		C05619
275	209.066	TRUE	0.898691	102535	0.000552364	C7H14O7	-H(-)	100	Sedoheptulose	D-Sedoheptulose; D-altro-Heptulose; Sedoheptulose; Volemulose		C02076
275	209.066	TRUE	0.898691	102535	0.000552364	C7H14O7	-H(-)	100	alpha-D-Mannoheptulopyranose	Mannoheptulose; alpha-D-Mannoheptulopyranose		C08236
275	209.066	TRUE	0.898691	102535	0.000552364	C7H14O7	-H(-)	100	beta-D-Sedoheptulopyranose	beta-D-Sedoheptulopyranose; beta-D-Sedoheptulose		C08355
275	209.066	TRUE	0.898691	102535	0.000552364	C7H14O7	-H(-)	100	Coriose	Coriose; D-altro-3-Heptulose		C19612
276	209.081	TRUE	0.814424	30423.9	-0.000132818	C5H15N4O3P	-H(-)	100	Phosphoagmatine	Agmatine phosphate; Phosphoagmatine		C02726
276	209.081	TRUE	0.814424	30423.9	0.000889383	C11H14O4	-H(-)	100	Sinapyl alcohol	Sinapoyl alcohol; Sinapyl alcohol		C02325
276	209.081	TRUE	0.814424	30423.9	0.000889383	C11H14O4	-H(-)	100	Phlorisovalerophenone	3-Methyl-1-(2,4,6-trihydroxyphenyl)butan-1-one; Phlorisovalerophenone		C07350
276	209.081	TRUE	0.814424	30423.9	0.000889383	C11H14O4	-H(-)	100	Multifidol	Multifidol		C10709
277	209.093	TRUE	0.890514	41443.6	0.000619669	C10H14N2O3	-H(-)	100	Aprobarbital	Aprobarbital		C07826
277	209.093	TRUE	0.890514	41443.6	0.000619669	C10H14N2O3	-H(-)	100	2,6-Dihydroxypseudooxynicotine	1-(2,6-Dihydroxypyridin-3-yl)-4-(methylamino)butan-1-one; 2,6-Dihydroxypseudooxynicotine		C15986
278	210.088	TRUE	0.856501	96251.3	0.000123828	C9H13N3O3	-H(-)	100	Zalcitabine	2',3'-Dideoxycytidine; Zalcitabine		C07207
279	211.001	TRUE	0.943178	39575.9	7.68345e-05	C5H9O7P	-H(-)	100	2-Phosphinomethylmalate	2-Phosphinomethylmalate; 2-Phosphinomethylmalic acid		C17947
280	211.026	TRUE	0.925839	15766.8	-0.000781457	C9H8O6	-H(-)	100	3-(2-Carboxyethenyl)-cis,cis-muconate	3-(2-Carboxyethenyl)-cis,cis-muconate		C04366
280	211.026	TRUE	0.925839	15766.8	-0.000781457	C9H8O6	-H(-)	100	2-Hydroxy-6-ketononatrienedioate	(2Z,4E,7E)-2-Hydroxy-6-oxonona-2,4,7-triene-1,9-dioate; 2-Hydroxy-6-ketononatrienedioate		C12624
280	211.026	TRUE	0.925839	15766.8	-0.000781457	C9H8O6	-H(-)	100	5-Carboxyvanillic acid	4-Hydroxy-5-methoxy-1,3-benzenedicarboxylate; 4-Hydroxy-5-methoxyisophthalate; 5-Carboxyvanillate; 5-Carboxyvanillic acid		C18338
281	211.06	TRUE	0.896766	41192.8	0.000861681	C10H12O5	-H(-)	100	Danielone	Danielone		C10674
281	211.06	TRUE	0.896766	41192.8	0.000861681	C10H12O5	-H(-)	100	n-Propyl gallate	Propyl gallate; n-Propyl gallate		C11155
282	211.109	TRUE	0.902251	30321.2	0.000107249	C10H16N2O3	-H(-)	100	Butabarbital	Butabarbital		C07827
283	211.134	TRUE	0.794241	17269.4	4.95744e-05	C12H20O3	-H(-)	100	Cucurbic acid	Cucurbic acid		C08482
283	211.134	TRUE	0.794241	17269.4	4.95744e-05	C12H20O3	-H(-)	100	Putaminoxin	Putaminoxin		C08509
283	211.134	TRUE	0.794241	17269.4	4.95744e-05	C12H20O3	-H(-)	100	Traumatin	(10E)-12-Oxododecenoic acid; Traumatin		C16309
283	211.134	TRUE	0.794241	17269.4	4.95744e-05	C12H20O3	-H(-)	100	12-Oxo-9(Z)-dodecenoic acid	12-Oxo-9(Z)-dodecenoic acid		C16311
284	211.17	TRUE	0.517439	5111.05	0.000429726	C13H24O2	-H(-)	100	cis-11-Methyl-2-dodecenoic acid	cis-11-Methyl-2-dodecenoic acid		C18206
285	213.017	TRUE	0.671617	87994.8	0.000268434	C5H11O7P	-H(-)	100	2-Deoxy-D-ribose 1-phosphate	2-Deoxy-D-ribose 1-phosphate; 2-Deoxy-alpha-D-ribose 1-phosphate		C00672
285	213.017	TRUE	0.671617	87994.8	0.000268434	C5H11O7P	-H(-)	100	2-Deoxy-D-ribose 5-phosphate	2-Deoxy-D-ribose 5-phosphate		C00673
285	213.017	TRUE	0.671617	87994.8	0.000268434	C5H11O7P	-H(-)	100	1-Deoxy-D-xylulose 5-phosphate	1-Deoxy-D-xylulose 5-phosphate		C11437
285	213.017	TRUE	0.671617	87994.8	0.000268434	C5H11O7P	-H(-)	100	5-Deoxyribose-1-phosphate	5-Deoxy-alpha-D-ribose-1-phosphate; 5-Deoxyribose-1-phosphate		C16637
286	213.124	TRUE	0.879422	144414	0.00039269	C10H18N2O3	-H(-)	100	Dethiobiotin	Desthiobiotin; Dethiobiotin		C01909
287	213.15	TRUE	0.777867	18822.1	-8.02063e-05	C12H22O3	-H(-)	100	3-Oxododecanoic acid	3-Oxododecanoate; 3-Oxododecanoic acid		C02367
288	214.049	TRUE	0.873466	268580	8.62482e-05	C5H14NO6P	-H(-)	100	sn-Glycero-3-phosphoethanolamine	Glycerophosphoethanolamine; sn-Glycero-3-phosphoethanolamine		C01233
289	214.108	TRUE	0.868266	14216.1	0.000187198	C10H17NO4	-H(-)	100	2-Amino-9,10-epoxy-8-oxodecanoic acid	2-Amino-9,10-epoxy-8-oxodecanoic acid		C12027
290	214.979	TRUE	0.56708	16652.5	-0.000680272	C4H9O6PS	-H(-)	100	S-Methyl-3-phospho-1-thio-D-glycerate	S-Methyl-3-phospho-1-thio-D-glycerate		C04399
291	215.033	TRUE	0.681256	2.81112e+06	-0.000348017	C5H13O7P	-H(-)	100	2-C-Methyl-D-erythritol 4-phosphate	2-C-Methyl-D-erythritol 4-phosphate		C11434
292	216.066	TRUE	0.705237	28299.5	0.000478968	C12H11NO3	-H(-)	100	(S)-beta-Methylindolepyruvate	(S)-beta-Methylindolepyruvate		C03914
292	216.066	TRUE	0.705237	28299.5	0.000478968	C12H11NO3	-H(-)	100	3-Methylindolepyruvate	3-Methylindolepyruvate		C05644
293	216.099	TRUE	0.863839	158110	0.000182403	C8H15N3O4	-H(-)	100	N-Acetyl-L-citrulline	N-Acetyl-L-citrulline		C15532
294	216.135	TRUE	0.777398	123262	0.000104317	C9H19N3O3	-H(-)	100	beta-Alanyl-L-lysine	beta-Alanyl-L-lysine		C05341
294	216.135	TRUE	0.777398	123262	0.000104317	C9H19N3O3	-H(-)	100	gamma-L-Glutamylputrescine	gamma-L-Glutamylputrescine		C15699
295	217.102	TRUE	0.835038	46565.1	-0.000852968	C9H18N2O2S	-H(-)	100	Thiofanox	Thiofanox		C18652
296	217.119	TRUE	0.806946	677250	0.000411526	C9H18N2O4	-H(-)	100	D-Lysopine	D-Lysopine; Lysopine; N2-(D-1-Carboxyethyl)-L-lysine		C04020
297	218.033	TRUE	0.705446	110879	0.000916437	C6H10N3O4P	-H(-)	100	4-Amino-2-methyl-5-phosphomethylpyrimidine	4-Amino-2-methyl-5-phosphomethylpyrimidine; 4-Amino-5-phosphomethyl-2-methylpyrimidine		C04556
298	218.067	TRUE	0.907654	27066.9	0.000437658	C8H13NO6	-H(-)	100	O-Succinyl-L-homoserine	O-Succinyl-L-homoserine; O-Succinylhomoserine; O4-Succinyl-L-homoserine		C01118
298	218.067	TRUE	0.907654	27066.9	0.000437658	C8H13NO6	-H(-)	100	N-Acetyl-D-mannosaminolactone	N-Acetyl-D-mannosaminolactone		C03776
299	218.081	TRUE	0.902385	25565.4	0.00120071	C12H13NO3	-H(-)	72	Aniracetam	Aniracetam		C13355
300	218.103	TRUE	0.902513	163451	0.00012211	C9H17NO5	-H(-)	100	Pantothenate	(R)-Pantothenate; Pantothenate; Pantothenic acid		C00864
301	218.122	TRUE	0.82289	80678.2	-4.16222e-05	C10H21NO2S	-H(-)	100	Pentahomomethionine	Pentahomomethionine		C17229
301	218.122	TRUE	0.82289	80678.2	0.000263554	C9H18N2O4	-H(-) [+1]	64	D-Lysopine	D-Lysopine; Lysopine; N2-(D-1-Carboxyethyl)-L-lysine		C04020
302	219.099	TRUE	0.844359	84694.2	-7.7301e-05	C8H16N2O5	-H(-)	100	N-Acetyl-beta-D-glucosaminylamine	N-Acetyl-beta-D-glucosaminylamine		C01239
303	220.082	TRUE	0.892161	19622.7	0.000269204	C8H15NO6	-H(-)	100	N-Acetyl-D-glucosamine	2-Acetamido-2-deoxy-D-glucose; GlcNAc; N-Acetyl-D-glucosamine; N-Acetylchitosamine		C00140
303	220.082	TRUE	0.892161	19622.7	0.000269204	C8H15NO6	-H(-)	100	N-Acetyl-D-mannosamine	2-Acetamido-2-deoxy-D-mannose; N-Acetyl-D-mannosamine		C00645
303	220.082	TRUE	0.892161	19622.7	0.000269204	C8H15NO6	-H(-)	100	N-Acetyl-D-galactosamine	2-Acetamido-2-deoxy-D-galactose; N-Acetyl-D-chondrosamine; N-Acetyl-D-galactosamine		C01132
303	220.082	TRUE	0.892161	19622.7	0.000269204	C8H15NO6	-H(-)	100	N-Acetylhexosamine	N-Acetylhexosamine		C02711
303	220.082	TRUE	0.892161	19622.7	0.000269204	C8H15NO6	-H(-)	100	N-Acetyl-D-hexosamine	N-Acetyl-D-hexosamine		C03136
303	220.082	TRUE	0.892161	19622.7	0.000269204	C8H15NO6	-H(-)	100	N-Acetyl-beta-D-glucosamine	N-Acetyl-beta-D-glucosamine		C03878
303	220.082	TRUE	0.892161	19622.7	0.000269204	C8H15NO6	-H(-)	100	N-Acetyl-beta-D-galactosamine	N-Acetyl-beta-D-galactosamine		C05021
303	220.082	TRUE	0.892161	19622.7	0.000269204	C8H15NO6	-H(-)	100	N-Acetyl-alpha-D-glucosamine	N-Acetyl-alpha-D-glucosamine		C20328
304	220.099	TRUE	0.854744	22128.7	-0.000753436	C12H15NO3	-H(-)	100	Metaxalone	Metaxalone		C07934
304	220.099	TRUE	0.854744	22128.7	-0.000753436	C12H15NO3.	-H(-)	100	Hydrocotarnine hydrochloride	Hydrocotarnine hydrochloride		C13534
304	220.099	TRUE	0.854744	22128.7	-0.000753436	C12H15NO3	-H(-)	100	Carbofuran	2,2-Dimethyl-2,3-dihydro-7-benzofuranyl N-methylcarbamate; Carbofuran		C14291
305	220.146	TRUE	0.503372	9940.21	-0.000911028	C12H19N3O.	-H(-)	100	Procarbazine hydrochloride	Procarbazine hydrochloride		C07376
305	220.146	TRUE	0.503372	9940.21	-0.000911028	C12H19N3O	-H(-)	100	Procarbazine	Procarbazine		C07402
305	220.146	TRUE	0.503372	9940.21	-0.000911028	C12H19N3O	-H(-)	100	Alchorneine	Alchorneine		C10566
305	220.146	TRUE	0.503372	9940.21	-0.000911028	C12H19N3O	-H(-)	100	CGP 28014	CGP 28014		C15477
306	221.066	TRUE	0.973194	182780	0.000174528	C8H14O7	-H(-)	100	6-Acetyl-D-glucose	6-Acetyl-D-glucose		C02655
307	221.093	TRUE	0.833311	150714	0.000263149	C11H14N2O3	-H(-)	100	N5-Phenyl-L-glutamine	N5-Phenyl-L-glutamine; gamma-Glutamylanilide		C20843
308	221.118	TRUE	0.774541	25210.3	0.000117092	C13H18O3	-H(-)	100	Dehydrovomifoliol	(6S)-6-Hydroxy-3-oxo-alpha-ionone; Dehydrovomifoliol		C02533
308	221.118	TRUE	0.774541	25210.3	0.000117092	C13H18O3	-H(-)	100	(+/-)-6-Hydroxy-3-oxo-alpha-ionone	(+/-)-6-Hydroxy-3-oxo-alpha-ionone		C04223
309	221.154	TRUE	0.624337	20767.5	0.000276361	C14H22O2	-H(-)	100	Rishitin	Rishitin		C09715
309	221.154	TRUE	0.624337	20767.5	0.000276361	C14H22O2	-H(-)	100	Isokobusone	Isokobusone		C16977
309	221.154	TRUE	0.624337	20767.5	0.000276361	C14H22O2	-H(-)	100	Kobusone	Kobusone		C16983
310	222.056	TRUE	0.472095	23032	0.000130541	C14H9NO2	-H(-)	100	Trisphaeridine	Trisphaeridine; Trispheridine		C12182
310	222.056	TRUE	0.472095	23032	0.000130541	C14H9NO2	-H(-)	100	2-Aminoanthraquinone	2-Aminoanthraquinone		C14444
310	222.056	TRUE	0.472095	23032	0.000130541	C14H9NO2	-H(-)	100	9-Nitroanthracene	9-Nitroanthracene		C19470
311	223.06	TRUE	0.866536	23368.5	0.000761599	C11H12O5	-H(-)	100	Sinapate	3,5-Dimethoxy-4-hydroxycinnamic acid; Sinapate; Sinapic acid		C00482
311	223.06	TRUE	0.866536	23368.5	0.000761599	C11H12O5	-H(-)	100	2-Benzylmalic acid	2-Benzylmalate; 2-Benzylmalic acid		C20653
311	223.06	TRUE	0.866536	23368.5	0.000761599	C11H12O5	-H(-)	100	3-Benzylmalic acid	3-Benzylmalate; 3-Benzylmalic acid		C20654
312	223.073	TRUE	0.900885	24169.2	-0.000592199	C10H12N2O4	-H(-)	100	3-Hydroxykynurenine	3-Hydroxy-DL-kynurenine; 3-Hydroxykynurenine		C02794
312	223.073	TRUE	0.900885	24169.2	-0.000592199	C10H12N2O4	-H(-)	100	3-Hydroxy-L-kynurenine	3-Hydroxy-L-kynurenine		C03227
312	223.073	TRUE	0.900885	24169.2	-0.000592199	C10H12N2O4	-H(-)	100	5-Hydroxykynurenine	5-Hydroxy-L-kynurenine; 5-Hydroxykynurenine		C05651
312	223.073	TRUE	0.900885	24169.2	-0.000592199	C10H12N2O4	-H(-)	100	Stavudine	2',3'-Didehydro-3'-deoxythimidine; Sanilvudine; Stavudine; d4T		C07312
313	223.097	TRUE	0.797947	14491.2	0.00099905	C12H16O4	-H(-)	100	Aspidinol	Aspidinol		C10673
313	223.097	TRUE	0.797947	14491.2	0.00099905	C12H16O4	-H(-)	100	2,4-Dihydroxy-6-pentylbenzoate	2,4-Dihydroxy-6-pentylbenzoate; Olivetolic acid		C20417
314	223.134	TRUE	0.476597	17401.2	0.000230136	C13H20O3	-H(-)	100	(6S,9R)-Vomifoliol	(6S,9R)-6-Hydroxy-3-oxo-alpha-ionol; (6S,9R)-Vomifoliol		C01760
314	223.134	TRUE	0.476597	17401.2	0.000230136	C13H20O3	-H(-)	100	(+/-)-6-Hydroxy-3-oxo-alpha-ionol	(+/-)-6-Hydroxy-3-oxo-alpha-ionol; Vomifoliol		C04166
314	223.134	TRUE	0.476597	17401.2	0.000230136	C13H20O3	-H(-)	100	Methyl jasmonate	(-)-Methyl jasmonate; Methyl jasmonate		C11512
314	223.134	TRUE	0.476597	17401.2	0.000230136	C13H20O3	-H(-)	100	(+)-7-Isomethyljasmonate	(+)-7-Isomethyljasmonate		C16318
315	224.067	TRUE	0.87173	19373.4	0.000767071	C9H11N3O4.	-H(-)	100	Ancitabin hydrochloride	Ancitabin hydrochloride; Cyclocytidine		C13112
316	224.104	TRUE	0.876665	23584.3	0.000177647	C10H15N3O3	-H(-)	100	1-(Methylnitrosoamino)-4-(3-pyridinyl)-1,4-butanediol	1-(Methylnitrosoamino)-4-(3-pyridinyl)-1,4-butanediol		C19577
316	224.104	TRUE	0.876665	23584.3	0.000177647	C10H15N3O3	-H(-)	100	alpha-[3-[(Hydroxymethyl)nitrosoamino]propyl]-3-pyridinemethanol	alpha-[3-[(Hydroxymethyl)nitrosoamino]propyl]-3-pyridinemethanol		C19580
316	224.104	TRUE	0.876665	23584.3	0.000177647	C10H15N3O3	-H(-)	100	4-(Methylnitrosamino)-1-(3-pyridyl-N-oxide)-1-butanol	4-(Methylnitrosamino)-1-(3-pyridyl-N-oxide)-1-butanol; NNAL-N-oxide		C19603
317	225.088	TRUE	0.9462	175179	0.000329834	C10H14N2O4	-H(-)	100	Porphobilinogen	Porphobilinogen		C00931
317	225.088	TRUE	0.9462	175179	0.000329834	C10H14N2O4.	-H(-)	100	Carbidopa-levodopa	Carbidopa-levodopa		C06870
318	225.113	TRUE	0.925423	26973.7	4.32193e-05	C12H18O4	-H(-)	100	Butopyronoxyl	Butopyronoxyl		C19142
319	225.124	TRUE	0.86505	364067	0.000230013	C11H18N2O3	-H(-)	100	Pentobarbital	5-Ethyl-5-(1-methylbutyl)-2,4,6(1H,3H,5H)-pyrimidinetrione; Pentobarbital		C07422
319	225.124	TRUE	0.86505	364067	0.000230013	C11H18N2O3	-H(-)	100	Amobarbital	Amobarbital		C07536
320	225.186	TRUE	0.644145	22009.5	5.14674e-05	C14H26O2	-H(-)	100	Myristoleic acid	(9Z)-Tetradecenoic acid; (Z)-Tetradec-9-enoic acid; 9-Tetradecenoic acid; Myristoleic acid		C08322
321	226.083	TRUE	0.912528	70176.1	0.000107012	C9H13N3O4	-H(-)	100	Deoxycytidine	2'-Deoxycytidine; Deoxycytidine		C00881
322	227.035	TRUE	0.879403	20506.7	0.000217112	C13H8O4	-H(-)	100	Euxanthone	1,7-Dihydroxyxanthone; Euxanthone		C10061
323	227.067	TRUE	0.935922	76206.9	8.92483e-05	C9H12N2O5	-H(-)	100	Deoxyuridine	2'-Deoxyuridine; 2-Deoxyuridine; Deoxyuridine		C00526
324	227.103	TRUE	0.881406	493793	0.000490683	C10H16N2O4	-H(-)	100	(S)-ATPA	(S)-ATPA		C13733
325	227.115	TRUE	0.914593	90300.4	-0.000349115	C9H16N4O3	-H(-)	100	Deoxyguanidinoproclavaminic acid	Deoxyamidinoproclavaminate; Deoxyguanidinoproclavaminate; Deoxyguanidinoproclavaminic acid		C06656
326	227.202	TRUE	0.416217	137229	9.47651e-05	C14H28O2	-H(-)	100	Tetradecanoic acid	Myristic acid; Tetradecanoate; Tetradecanoic acid		C06424
327	231.098	TRUE	0.879198	173580	0.0001753	C9H16N2O5	-H(-)	100	Boc-Asn	Boc-Asn; N-alpha-Boc-L-asparagine		C01410
327	231.098	TRUE	0.879198	173580	0.0001753	C9H16N2O5	-H(-)	100	N2-Succinyl-L-ornithine	(2S)-5-Amino-2-(3-carboxypropanoylamino)pentanoic acid; N2-Succinyl-L-ornithine		C03415
327	231.098	TRUE	0.879198	173580	0.0001753	C9H16N2O5	-H(-)	100	N6-Acetyl-LL-2,6-diaminoheptanedioate	N-Acetyl-LL-2,6-diaminoheptanedioate; N2-Acetyl-LL-2,6-diaminoheptanedioate; N2-Acetyl-LL-2,6-diaminopimelate; N6-Acetyl-L-2,6-diaminoheptanedioate; N6-Acetyl-L-2,6-diaminopimelate; N6-Acetyl-LL-2,6-diaminoheptanedioate; N6-Acetyl-LL-2,6-diaminopimelate		C04390
327	231.098	TRUE	0.879198	173580	0.0001753	C9H16N2O5	-H(-)	100	4-(L-gamma-Glutamylamino)butanoate	4-(Glutamylamino)butanoate; 4-(L-gamma-Glutamylamino)butanoate; gamma-Glutamyl-GABA; gamma-Glutamyl-gamma-aminobutyrate		C15767
328	232.069	TRUE	0.776931	13825.9	-0.000658874	C8H16N3OPS	-H(-)	100	Bis(1-aziridinyl)morpholinophosphine sulfide	Bis(1-aziridinyl)morpholinophosphine sulfide		C19347
328	232.069	TRUE	0.776931	13825.9	0.00111115	C13H12O4	-H(-) [+1]	60	Goniothalenol	Altholactone; Goniothalenol		C09930
328	232.069	TRUE	0.776931	13825.9	0.00111115	C13H12O4	-H(-) [+1]	60	2-Hydroxy-7-methoxy-5-methyl-1-naphthoate	2-Hydroxy-7-methoxy-5-methyl-1-naphthoate		C20841
329	232.137	TRUE	0.814629	64122.2	0.000556316	C11H23NO2S	-H(-)	100	Hexahomomethionine	Hexahomomethionine		C17233
330	233.06	TRUE	0.769204	30979.4	0.00050973	C16H10O2	-H(-)	100	4,5-Dihydroxypyrene	4,5-Dihydroxypyrene		C18250
330	233.06	TRUE	0.769204	30979.4	0.00050973	C16H10O2	-H(-)	100	1,6-Dihydroxypyrene	1,6-Dihydroxypyrene; 1,6-Pyrenediol		C18263
330	233.06	TRUE	0.769204	30979.4	0.00050973	C16H10O2	-H(-)	100	1,8-Dihydroxypyrene	1,8-Dihydroxypyrene; 1,8-Pyrenediol		C18264
330	233.06	TRUE	0.769204	30979.4	0.00050973	C16H10O2	-H(-)	100	1-Hydroxypyrene-6,7-oxide	1-Hydroxypyrene-6,7-oxide		C18265
330	233.06	TRUE	0.769204	30979.4	0.00050973	C16H10O2	-H(-)	100	1-Hydroxypyrene-7,8-oxide	1-Hydroxypyrene-7,8-oxide		C18266
331	234.06	TRUE	0.863897	8859.14	-0.000968512	C12H13NO2S	-H(-)	100	Carboxin	Carboxin		C11255
332	235.061	TRUE	0.863603	13762.2	2.34994e-05	C12H12O5	-H(-)	100	5,6,7-Trimethoxycoumarin	5,6,7-Trimethoxycoumarin		C09313
332	235.061	TRUE	0.863603	13762.2	2.34994e-05	C12H12O5	-H(-)	100	Orthosporin	Orthosporin		C09958
333	235.109	TRUE	0.871619	56422.9	7.20306e-05	C12H16N2O3	-H(-)	100	Carbetamide	Carbetamide		C11075
333	235.109	TRUE	0.871619	56422.9	7.20306e-05	C12H16N2O3	-H(-)	100	Hexobarbitone	Hexobarbital; Hexobarbitone		C11723
334	235.17	TRUE	0.518935	6723.94	0.000720721	C15H24O2	-H(-)	100	Latia luciferin	Latia luciferin		C02293
334	235.17	TRUE	0.518935	6723.94	0.000720721	C15H24O2	-H(-)	100	Capsidiol	Capsidiol		C09627
334	235.17	TRUE	0.518935	6723.94	0.000720721	C15H24O2	-H(-)	100	Helminthosporol	Helminthosporol		C09678
334	235.17	TRUE	0.518935	6723.94	0.000720721	C15H24O2	-H(-)	100	Hernandulcin	Hernandulcin		C09681
334	235.17	TRUE	0.518935	6723.94	0.000720721	C15H24O2	-H(-)	100	Lubimin	Lubimin		C09700
334	235.17	TRUE	0.518935	6723.94	0.000720721	C15H24O2	-H(-)	100	Sirenin	Sirenin		C09733
334	235.17	TRUE	0.518935	6723.94	0.000720721	C15H24O2	-H(-)	100	Farnesoic acid	Farnesoic acid; trans,trans-Farnesoic acid		C16502
334	235.17	TRUE	0.518935	6723.94	0.000720721	C15H24O2	-H(-)	100	Cyperolone	Cyperolone		C16946
334	235.17	TRUE	0.518935	6723.94	0.000720721	C15H24O2	-H(-)	100	Curdione	Curdione		C17493
334	235.17	TRUE	0.518935	6723.94	0.000720721	C15H24O2	-H(-)	100	Kikkanol B	Kikkanol B		C17604
335	236.077	TRUE	0.900244	16557.2	0.000239987	C8H15NO7	-H(-)	100	N-Acetyl-D-glucosaminate	N-Acetyl-D-glucosaminate		C01133
335	236.077	TRUE	0.900244	16557.2	0.000239987	C8H15NO7	-H(-)	100	N-Glycolyl-D-glucosamine	N-Glycolyl-D-glucosamine		C03146
335	236.077	TRUE	0.900244	16557.2	0.000239987	C8H15NO7	-H(-)	100	Glycolyl-D-mannosamine	Glycolyl-D-mannosamine; N-Glycolyl-D-mannosamine		C03521
336	237.062	TRUE	0.907252	50731.3	7.41231e-05	C8H14O8	-H(-)	100	3-Deoxy-D-manno-octulosonate	2-Dehydro-3-deoxy-D-octonate; 3-Deoxy-D-manno-2-octulosonate; 3-Deoxy-D-manno-octulosonate; 3-Deoxyoctulosonic acid; KDO		C01187
337	237.088	TRUE	0.951464	51384.3	3.89178e-05	C11H14N2O4	-H(-)	100	Felbamate	Felbamate		C07501
338	239.003	TRUE	0.445365	474350	-0.000967367	C10H8O5S	-H(-)	100	1,2-Dihydroxynaphthalene-6-sulfonate	1,2-Dihydroxynaphthalene-6-sulfonate		C16196
339	239.115	TRUE	0.878474	31842.3	-6.05925e-05	C10H16N4O3	-H(-)	100	Homocarnosine	Homocarnosine; L-Homocarnosine; N-(4-Amino-1-oxobutyryl)histidine; gamma-Aminobutyryl histidine		C00884
339	239.115	TRUE	0.878474	31842.3	-6.05925e-05	C10H16N4O3	-H(-)	100	beta-Alanyl-N(pi)-methyl-L-histidine	Anserine; beta-Alanyl-N(pi)-methyl-L-histidine		C01262
339	239.115	TRUE	0.878474	31842.3	-6.05925e-05	C10H16N4O3	-H(-)	100	N(alpha)-gamma-L-Glutamylhistamine	N(alpha)-gamma-L-Glutamylhistamine; Nalpha-gamma-L-glutamylhistamine		C04138
340	239.14	TRUE	0.81404	9537.69	0.000196239	C12H20N2O3	-H(-)	100	Pirbuterol	Pirbuterol		C07807
341	240.099	TRUE	0.884607	15517.3	7.36288e-05	C10H15N3O4	-H(-)	100	5-Methyl-2'-deoxycytidine	5-Methyl-2'-deoxycytidine		C03592
342	241.083	TRUE	0.968377	253267	0.000325007	C10H14N2O5	-H(-)	100	Thymidine	Deoxythymidine; Thymidine		C00214
342	241.083	TRUE	0.968377	253267	0.000325007	C10H14N2O5	-H(-)	100	HC Yellow No. 4	2-[[2-(2-Hydroxyethoxy)-4-nitrophenyl]amino]-ethanol; HC Yellow No. 4		C19431
343	243.027	TRUE	0.76045	82814.6	0.000154734	C6H13O8P	-H(-)	100	L-Fuculose 1-phosphate	L-Fuculose 1-phosphate		C01099
343	243.027	TRUE	0.76045	82814.6	0.000154734	C6H13O8P	-H(-)	100	L-Rhamnulose 1-phosphate	L-Rhamnulose 1-phosphate		C01131
343	243.027	TRUE	0.76045	82814.6	0.000154734	C6H13O8P	-H(-)	100	L-Fucose 1-phosphate	6-Deoxy-L-galactose 1-phosphate; L-Fucose 1-phosphate; beta-L-Fucose 1-phosphate		C02985
343	243.027	TRUE	0.76045	82814.6	0.000154734	C6H13O8P	-H(-)	100	2-Deoxy-D-glucose 6-phosphate	2-Deoxy-D-glucose 6-phosphate		C06369
344	243.062	TRUE	0.855642	453871	0.000335423	C9H12N2O6	-H(-)	100	Uridine	Uridine		C00299
344	243.062	TRUE	0.855642	453871	0.000335423	C9H12N2O6	-H(-)	100	Pseudouridine	Pseudouridine		C02067
344	243.062	TRUE	0.855642	453871	0.000335423	C9H12N2O6	-H(-)	100	Spongouridine	Spongouridine		C16745
345	243.102	TRUE	0.786559	78327.3	0.000914717	C15H16O3	-H(-)	100	Osthol	Osthol		C09280
345	243.102	TRUE	0.786559	78327.3	0.000914717	C15H16O3	-H(-)	100	Encelin	Encelin		C09404
345	243.102	TRUE	0.786559	78327.3	0.000914717	C15H16O3	-H(-)	100	Batatasin IV	3-[2-(2-Hydroxyphenyl)ethyl]-5-methoxyphenol; Batatasin IV		C10247
345	243.102	TRUE	0.786559	78327.3	0.000914717	C15H16O3	-H(-)	100	5-Hydroxybisphenol A	5-Hydroxybisphenol; 5-Hydroxybisphenol A; BPAcatechol		C13626
345	243.102	TRUE	0.786559	78327.3	0.000914717	C15H16O3	-H(-)	100	1,2-Bis(4-hydroxyphenyl)-2-propanol	1,2-Bis(4-hydroxyphenyl)-2-propanol		C13629
345	243.102	TRUE	0.786559	78327.3	0.000914717	C15H16O3	-H(-)	100	2,2-Bis(4-hydroxyphenyl)-1-propanol	2,2-Bis(4-hydroxyphenyl)-1-propanol		C13631
345	243.102	TRUE	0.786559	78327.3	0.000914717	C15H16O3	-H(-)	100	Linderalactone	Linderalactone		C17425
346	243.114	TRUE	0.879772	62099.9	-0.000582495	C14H16N2O2	-H(-)	100	Etomidate	1-(1-Phenylethyl)-imidazole-5-carboxylic acid, ethyl ester; Etomidate		C07522
346	243.114	TRUE	0.879772	62099.9	-0.000582495	C14H16N2O2	-H(-)	100	Cyclo(L-Phe-L-Pro)	(3S-trans)-3-Benzylhexahydropyrrolo(1,2-a)pyrazine-1,4-dione; Cyclo(L-Phe-L-Pro)		C11847
346	243.114	TRUE	0.879772	62099.9	-0.000582495	C14H16N2O2	-H(-)	100	3,3'-Dimethoxybenzidine	3,3'-Dimethoxybenzidine; ortho-Dianisidine		C19231
347	243.171	TRUE	0.841994	269659	4.02878e-05	C12H24N2O3	-H(-)	100	N-(6-Aminohexanoyl)-6-aminohexanoate	N-(6-Aminohexanoyl)-6-aminohexanoate		C01255
347	243.171	TRUE	0.841994	269659	4.02878e-05	C12H24N2O3	-H(-)	100	Leucyl-leucine	Leucyl-leucine		C11332
348	244.99	TRUE	0.562251	65794.8	0.000231074	C6H15O2PS3	-H(-)	100	Thiometon	Thiometon		C18665
349	245.043	TRUE	0.880914	118806	0.00012445	C6H15O8P	-H(-)	100	Glycerophosphoglycerol	Glycerophosphoglycerol		C03274
350	245.114	TRUE	0.891563	451913	0.000103021	C10H18N2O5	-H(-)	100	2,4-Bis(acetamido)-2,4,6-trideoxy-beta-L-altropyranose	2,4-Bis(acetamido)-2,4,6-trideoxy-beta-L-altropyranose		C19972
350	245.114	TRUE	0.891563	451913	0.000103021	C10H18N2O5	-H(-)	100	2,4-Diacetamido-2,4,6-trideoxy-D-mannopyranose	2,4-Diacetamido-2,4,6-trideoxy-D-mannopyranose; 2,4-Diacetamido-2,4,6-trideoxy-alpha-D-mannopyranose		C20424
351	246.098	TRUE	0.937134	27321.3	0.000214453	C10H17NO6	-H(-)	100	Linamarin	Linamarin; Phaseolunatin		C01594
351	246.098	TRUE	0.937134	27321.3	0.000214453	C10H17NO6	-H(-)	100	Valinopine	Valinopine		C19976
352	247.078	TRUE	0.791387	22270.6	-0.00121705	C17H12O2	-H(-)	71	1-Hydroxy-6-methoxypyrene	1-Hydroxy-6-methoxypyrene; 6-Methoxy-1-pyrenol		C18261
352	247.078	TRUE	0.791387	22270.6	-0.00121705	C17H12O2	-H(-)	71	1-Methoxypyrene-6,7-oxide	1-Methoxypyrene-6,7-oxide		C18262
352	247.078	TRUE	0.791387	22270.6	-0.00121705	C17H12O2	-H(-)	71	7,8-Dihydropyrene-8-carboxylate	1,2-Dihydropyrene-1-carboxylate; 7,8-Dihydropyrene-8-carboxylate		C18273
352	247.078	TRUE	0.791387	22270.6	-0.00121705	C17H12O2	-H(-)	71	7,8-Dihydropyrene-7-carboxylate	1,2-Dihydropyrene-2-carboxylate; 7,8-Dihydropyrene-7-carboxylate		C18274
353	248.078	TRUE	0.89481	15529.6	0.000358465	C10H19NO2S2	-H(-)	100	S-Acetyldihydrolipoamide	6-S-Acetyldihydrolipoamide; S-Acetyldihydrolipoamide		C01136
354	248.128	TRUE	0.82161	6544.24	0.00109573	C14H19NO3	-H(-)	86	Ruspolinone	Ruspolinone		C10169
354	248.128	TRUE	0.82161	6544.24	0.00109573	C14H19NO3	-H(-)	86	1-(4-Methoxyphenyl)-3-(4-morpholinyl)-1-propanone	1-(4-Methoxyphenyl)-3-(4-morpholinyl)-1-propanone; 4'-Methoxy-3-morpholino-propiophenone		C15032
355	249.054	TRUE	0.810931	21050.7	0.000877512	C8H14N2O5S	-H(-)	100	gamma-L-Glutamyl-L-cysteine	5-L-Glutamyl-L-cysteine; L-gamma-Glutamylcysteine; gamma-Glutamylcysteine; gamma-L-Glutamyl-L-cysteine		C00669
356	249.149	TRUE	0.684516	15201	0.000298316	C15H22O3	-H(-)	100	Gemfibrozil	Gemfibrozil		C07020
356	249.149	TRUE	0.684516	15201	0.000298316	C15H22O3	-H(-)	100	Arbusculin A	Arbusculin A		C09295
356	249.149	TRUE	0.684516	15201	0.000298316	C15H22O3	-H(-)	100	Ipomeamarone	(+)-Ngaione; Ipomeamarone		C09689
356	249.149	TRUE	0.684516	15201	0.000298316	C15H22O3	-H(-)	100	Piperdial	Piperdial		C09711
356	249.149	TRUE	0.684516	15201	0.000298316	C15H22O3	-H(-)	100	Warburganal	Warburganal		C09748
356	249.149	TRUE	0.684516	15201	0.000298316	C15H22O3	-H(-)	100	Xanthoxin	2-cis,4-trans-Xanthoxin; Xanthoxin		C13453
356	249.149	TRUE	0.684516	15201	0.000298316	C15H22O3	-H(-)	100	Abscisic alcohol	Abscisic alcohol		C13456
356	249.149	TRUE	0.684516	15201	0.000298316	C15H22O3	-H(-)	100	2-Ethylhexyl-4-hydroxybenzoate	2-Ethylhexyl-4-hydroxybenzoate		C14716
356	249.149	TRUE	0.684516	15201	0.000298316	C15H22O3	-H(-)	100	1-Deoxy-11beta-hydroxypentalenate	1-Deoxy-11beta-hydroxypentalenate		C20403
356	249.149	TRUE	0.684516	15201	0.000298316	C15H22O3	-H(-)	100	Pentalenate	Pentalenate		C20405
357	250.093	TRUE	0.907665	42697.5	-0.000120086	C9H17NO7	-H(-)	100	Muramic acid	2-Amino-3-O-D-1-carboxyethyl-2-deoxy-D-glucose; 3-O-alpha-Carboxyethyl-D-glucosamine; Muramic acid		C06470
358	251.164	TRUE	0.781275	7660.78	0.000862048	C15H24O3	-H(-)	100	Cuauhtemone	Cuauhtemone		C09645
358	251.164	TRUE	0.781275	7660.78	0.000862048	C15H24O3	-H(-)	100	Juvenile hormone III acid	Juvenile hormone III acid		C16504
358	251.164	TRUE	0.781275	7660.78	0.000862048	C15H24O3	-H(-)	100	Sugetriol	Sugetriol		C17502
358	251.164	TRUE	0.781275	7660.78	0.000862048	C15H24O3	-H(-)	100	Kikkanol C	Kikkanol C		C17605
358	251.164	TRUE	0.781275	7660.78	0.000862048	C15H24O3	-H(-)	100	Kikkanol E	Kikkanol E		C17607
358	251.164	TRUE	0.781275	7660.78	0.000862048	C15H24O3	-H(-)	100	Indicumenone	Indicumenone		C17612
359	251.201	TRUE	0.461573	3771.75	0.000839638	C16H28O2	-H(-)	100	Hydnocarpic acid	Hydnocarpic acid		C16795
360	253.071	TRUE	0.910303	11333.6	0.000202657	C6H15N4O5P	-H(-)	100	L-Arginine phosphate	Arginine phosphate; L-Arginine phosphate; L-Arginine-NG-phosphoric acid; N(omega)-Phospho-L-arginine; N-Phospho-L-arginine; N5-[Imino(phosphonoamino)methyl]L-ornithine; Phosphoarginine; Phosphoarginine A; omega-N-Phosphoarginine		C05945
360	253.071	TRUE	0.910303	11333.6	-0.000682353	C15H11NO3	-H(-) [+1]	67	2-(4-Hydroxybenzyl)isoindole-1,3-dione	2-(4-Hydroxybenzyl)isoindole-1,3-dione		C14264
360	253.071	TRUE	0.910303	11333.6	-0.000682353	C15H11NO3	-H(-) [+1]	67	2-Acetamido-6H-dibenzo[b,d]pyran-6-one	2-Acetamido-6H-dibenzo[b,d]pyran-6-one		C14620
360	253.071	TRUE	0.910303	11333.6	-0.000682353	C15H11NO3	-H(-) [+1]	67	N-(6-Oxo-6H-dibenzo[b,d]pyran-3-yl)acetamide	N-(6-Oxo-6H-dibenzo[b,d]pyran-3-yl)acetamide		C14920
361	253.093	TRUE	0.950207	52668.2	0.000333166	C9H18O8	-H(-)	100	3-beta-D-Galactosyl-sn-glycerol	3-beta-D-Galactosyl-sn-glycerol; Galactosylglycerol		C05401
361	253.093	TRUE	0.950207	52668.2	0.000333166	C9H18O8	-H(-)	100	2-(beta-D-Glucosyl)-sn-glycerol	2-(beta-D-Glucosyl)-sn-glycerol		C11546
362	253.18	TRUE	0.714211	5688.83	0.000921816	C15H26O3	-H(-)	100	Kikkanol A	Kikkanol A		C17603
362	253.18	TRUE	0.714211	5688.83	0.000921816	C15H26O3	-H(-)	100	Kikkanol D	Kikkanol D		C17606
362	253.18	TRUE	0.714211	5688.83	0.000921816	C15H26O3	-H(-)	100	Kikkanol F	Kikkanol F		C17608
362	253.18	TRUE	0.714211	5688.83	0.000921816	C15H26O3	-H(-)	100	Chrysanthetriol	Chrysanthetriol		C17610
362	253.18	TRUE	0.714211	5688.83	0.000921816	C15H26O3	-H(-)	100	Prohydrojasmon	Prohydrojasmon		C18538
363	253.217	TRUE	0.540589	75842.7	0.000207408	C16H30O2	-H(-)	100	(9Z)-Hexadecenoic acid	(9Z)-Hexadecenoic acid; Palmitoleic acid; cis-9-Hexadecenoic acid		C08362
364	254.007	TRUE	0.833234	13472.6	-0.000526072	C9H9N3O2S2	-H(-)	100	Sulfathiazole	Sulfathiazole		C11169
365	254.115	TRUE	0.885775	15318.2	2.59252e-05	C11H17N3O4	-H(-)	100	HC Blue No.1	2,2'-[[4-(Methylamino)-3-nitrophenyl]imino]bisethanol; HC Blue No.1		C19247
366	254.151	TRUE	0.847868	12194.3	0.000334538	C12H21N3O3	-H(-)	100	L-Pyrrolysine	L-Pyrrolysine; Pyrrolysine		C16138
367	255.03	TRUE	0.901451	24011.6	-0.000331201	C14H8O5	-H(-)	100	Anthragallol	Anthragallol		C10297
367	255.03	TRUE	0.901451	24011.6	-0.000331201	C14H8O5	-H(-)	100	Purpurin	Purpurin		C10395
368	255.089	TRUE	0.946794	17657.7	-0.00035437	C13H12N4O2	-H(-)	100	N-Acetoxy-IQ	N-Acetoxy-IQ		C20290
368	255.089	TRUE	0.946794	17657.7	0.00098933	C15H14NO3.	-H(-)	100	Tolmetin sodium	Tolmetin sodium		C02328
369	257.175	TRUE	0.793921	12555.4	0.000629956	C14H26O4	-H(-)	100	Dibutyl adipate	Di-n-butyl adipate; Dibutyl adipate		C14253
369	257.175	TRUE	0.793921	12555.4	0.000629956	C14H26O4	-H(-)	100	Diisobutyl adipate	Diisobutyl adipate		C14260
370	258.038	TRUE	0.824429	20512.6	4.92002e-05	C6H14NO8P	-H(-)	100	D-Glucosamine 6-phosphate	D-Glucosamine 6-phosphate; D-Glucosamine phosphate		C00352
370	258.038	TRUE	0.824429	20512.6	4.92002e-05	C6H14NO8P	-H(-)	100	1-Amino-1-deoxy-scyllo-inositol 4-phosphate	1-Amino-1-deoxy-scyllo-inositol 4-phosphate; scyllo-Inosamine 4-phosphate		C01283
370	258.038	TRUE	0.824429	20512.6	4.92002e-05	C6H14NO8P	-H(-)	100	D-Galactosamine 1-phosphate	D-Galactosamine 1-phosphate		C03783
370	258.038	TRUE	0.824429	20512.6	4.92002e-05	C6H14NO8P	-H(-)	100	alpha-D-Glucosamine 1-phosphate	D-Glucosamine 1-phosphate; alpha-D-Glucosamine 1-phosphate		C06156
370	258.038	TRUE	0.824429	20512.6	4.92002e-05	C6H14NO8P	-H(-)	100	D-Galactosamine 6-phosphate	D-Galactosamine 6-phosphate		C06377
370	258.038	TRUE	0.824429	20512.6	4.92002e-05	C6H14NO8P	-H(-)	100	Kanosamine 6-phosphate	D-Kanosamine 6-phosphate; Kanosamine 6-phosphate		C12213
370	258.038	TRUE	0.824429	20512.6	4.92002e-05	C6H14NO8P	-H(-)	100	Aminofructose 6-phosphate	Amino-D-fructose 6-phosphate; Aminofructose 6-phosphate		C12214
371	258.11	TRUE	0.952623	84496.4	7.66696e-06	C10H17N3O5	-H(-)	100	Linatine	Linatine; N-(gamma-L-Glutamyl)amino-D-proline		C05939
372	260.057	TRUE	0.647196	68498.3	-0.00051317	C13H11NO5	-H(-)	100	Oxolinic acid	Oxolinic acid		C11342
373	261.125	TRUE	0.851492	126680	-0.000918519	C14H18N2O3	-H(-)	100	Methohexital	Methohexital		C07844
373	261.125	TRUE	0.851492	126680	-0.000918519	C14H18N2O3	-H(-)	100	Physovenine	Physovenine		C09232
374	263.14	TRUE	0.833131	129881	0.000219985	C14H20N2O3	-H(-)	100	Feruloylputrescine	Feruloylputrescine; Subaphyllin		C10497
375	264.144	TRUE	0.878409	29741.9	-0.000951983	C15H23NOS	-H(-)	100	Esprocarb	Esprocarb		C14526
375	264.144	TRUE	0.878409	29741.9	-0.000524737	C14H20N2O3	-H(-) [+1]	66	Feruloylputrescine	Feruloylputrescine; Subaphyllin		C10497
376	265.094	TRUE	0.949265	42293.3	0.000295293	C11H14N4O4	-H(-)	100	8-Oxodeoxycoformycin	8-Oxodeoxycoformycin		C02957
377	266.089	TRUE	0.909165	74595.3	-0.000401079	C9H17NO8	-H(-)	100	Neuraminic acid	5-Amino-3,5-dideoxy-D-glycero-D-galacto-2-nonulosonic acid; Neuraminic acid		C06469
377	266.089	TRUE	0.909165	74595.3	-0.000401079	C9H17NO8	-H(-)	100	Miserotoxin	Miserotoxin		C08507
377	266.089	TRUE	0.909165	74595.3	0.000941694	C10H13N5O4	-H(-)	100	Adenosine	Adenosine		C00212
377	266.089	TRUE	0.909165	74595.3	0.000941694	C10H13N5O4	-H(-)	100	Deoxyguanosine	2'-Deoxyguanosine; Deoxyguanosine		C00330
377	266.089	TRUE	0.909165	74595.3	0.000941694	C10H13N5O4.	-H(-)	100	Vidarabine	9-beta-D-Arabino furanosyl adenine monohydrate; Vidarabine		C07195
377	266.089	TRUE	0.909165	74595.3	0.000941694	C10H13N5O4	-H(-)	100	Zidovudine	3'-Azido-3'-deoxythymidine; AZT; Azidothymidine; Zidovudine		C07210
378	266.114	TRUE	0.915568	41524.7	0.00047435	C12H17N3O4	-H(-)	100	Agaritine	Agaritine		C01550
379	267.073	TRUE	0.880445	215090	0.000184458	C10H12N4O5	-H(-)	100	Inosine	Inosine		C00294
380	267.124	TRUE	0.772223	24486.2	0.000924753	C15H16N4O	-H(-)	100	Ripazepam	Ripazepam		C19518
381	267.146	TRUE	0.821955	195655	6.57212e-05	C12H20N4O3	-H(-)	100	Histidylleucine	His-Leu; Histidylleucine; N-L-Histidyl-L-leucin		C05010
382	267.233	TRUE	0.440223	19745.3	0.000404997	C17H32O2	-H(-)	100	omega-Cyclohexylundecanoic acid	Cyclohexaneundecanoic acid; omega-Cyclohexylundecanoic acid		C12100
382	267.233	TRUE	0.440223	19745.3	0.000404997	C17H32O2	-H(-)	100	9E-Heptadecenoic acid	(E)-Heptadec-9-enoic acid; 9E-Heptadecenoic acid		C16536
383	268.022	TRUE	0.816921	31296.8	0.000420724	C7H12NO8P	-H(-)	100	N-Acetyl-L-glutamate 5-phosphate	N-Acetyl-L-glutamate 5-phosphate; N-Acetyl-L-glutamyl 5-phosphate		C04133
384	269.046	TRUE	0.846381	14121.8	-0.000260284	C15H10O5	-H(-)	100	Apigenin	4',5,7-Trihydroxyflavone; 5,7,4'-Trihydroxyflavone; Apigenin		C01477
384	269.046	TRUE	0.846381	14121.8	-0.000260284	C15H10O5	-H(-)	100	2'-Hydroxydaidzein	2'-Hydroxydaidzein; 3-(2,4-Dihydroxyphenyl)-7-hydroxychromen-4-one		C02495
384	269.046	TRUE	0.846381	14121.8	-0.000260284	C15H10O5	-H(-)	100	Genistein	5,7,4'-Trihydroxyisoflavone; Genistein		C06563
384	269.046	TRUE	0.846381	14121.8	-0.000260284	C15H10O5	-H(-)	100	Sulphuretin	Sulfuretin; Sulphuretin		C08730
384	269.046	TRUE	0.846381	14121.8	-0.000260284	C15H10O5	-H(-)	100	Baicalein	5,6,7-Trihydroxyflavone; Baicalein		C10023
384	269.046	TRUE	0.846381	14121.8	-0.000260284	C15H10O5	-H(-)	100	Resokaempherol	3,7,4'-Trihydroxyflavone; 5-Deoxykaempferol; Resokaempherol		C10037
384	269.046	TRUE	0.846381	14121.8	-0.000260284	C15H10O5	-H(-)	100	Galangin	3,5,7-Trihydroxyflavone; Galangin		C10044
384	269.046	TRUE	0.846381	14121.8	-0.000260284	C15H10O5	-H(-)	100	Norwogonin	5,7,8-Trihydroxyflavone; Norwogonin		C10113
384	269.046	TRUE	0.846381	14121.8	-0.000260284	C15H10O5	-H(-)	100	Aloe-emodin	Aloe-emodin		C10294
384	269.046	TRUE	0.846381	14121.8	-0.000260284	C15H10O5	-H(-)	100	Emodin	Emodin		C10343
384	269.046	TRUE	0.846381	14121.8	-0.000260284	C15H10O5	-H(-)	100	Lucidin	Lucidin		C10369
384	269.046	TRUE	0.846381	14121.8	-0.000260284	C15H10O5	-H(-)	100	Morindone	1,2,5-Trihydroxy-6-methyl-9,10-anthracenedione; Morindone		C10376
384	269.046	TRUE	0.846381	14121.8	-0.000260284	C15H10O5	-H(-)	100	Norobtusifolin	2-Hydroxychrysophanol; Norobtusifolin		C10379
384	269.046	TRUE	0.846381	14121.8	-0.000260284	C15H10O5	-H(-)	100	Purpurin 1-methyl ether	Purpurin 1-methyl ether		C10397
384	269.046	TRUE	0.846381	14121.8	-0.000260284	C15H10O5	-H(-)	100	3',4',7-Trihydroxyisoflavone	3',4',7-Trihydroxyisoflavone		C14313
384	269.046	TRUE	0.846381	14121.8	-0.000260284	C15H10O5	-H(-)	100	4',6,7-Trihydroxyisoflavone	4',6,7-Trihydroxyisoflavone; 6-Hydroxydaidzein		C14314
384	269.046	TRUE	0.846381	14121.8	-0.000260284	C15H10O5	-H(-)	100	3,6,4'-Trihydroxyflavone	3,6,4'-Trihydroxyflavone; 3,6-Dihydroxy-2-(4-hydroxyphenyl)-4H-1-benzopyran-4-one		C15222
384	269.046	TRUE	0.846381	14121.8	-0.000260284	C15H10O5	-H(-)	100	Islandicin	Funiculosin; Islandicin		C16796
385	269.212	TRUE	0.746497	54208.4	0.000116952	C16H30O3	-H(-)	100	16-Oxo-palmitate	16-Oxo-palmitate		C19614
386	271.061	TRUE	0.867191	26591.6	0.000196058	C15H12O5	-H(-)	100	Naringenin	(-)-(2S)-Naringenin; (2S)-Naringenin; 4',5,7-Trihydroxyflavanone; Naringenin		C00509
386	271.061	TRUE	0.867191	26591.6	0.000196058	C15H12O5	-H(-)	100	3,6,9-Trihydroxypterocarpan	(-)-Glycinol; (6aS,11aS)-3,6a,9-Trihydroxypterocarpan; 3,6,9-Trihydroxypterocarpan		C01263
386	271.061	TRUE	0.867191	26591.6	0.000196058	C15H12O5	-H(-)	100	Licodione	Licodione		C01592
386	271.061	TRUE	0.867191	26591.6	0.000196058	C15H12O5	-H(-)	100	2'-Hydroxydihydrodaidzein	2'-Hydroxy-2,3-dihydrodaidzein; 2'-Hydroxydihydrodaidzein		C03567
386	271.061	TRUE	0.867191	26591.6	0.000196058	C15H12O5	-H(-)	100	Naringenin chalcone	2',4,4',6'-Tetrahydroxychalcone; Chalconaringenin; Isosalipurpol; Naringenin chalcone		C06561
386	271.061	TRUE	0.867191	26591.6	0.000196058	C15H12O5	-H(-)	100	Butein	Butein		C08578
386	271.061	TRUE	0.867191	26591.6	0.000196058	C15H12O5	-H(-)	100	Rubrofusarin	Rubrofusarin		C09047
386	271.061	TRUE	0.867191	26591.6	0.000196058	C15H12O5	-H(-)	100	Butin	(-)-Butin; 7,3',4'-Trihydroxyflavanone; Butin		C09614
386	271.061	TRUE	0.867191	26591.6	0.000196058	C15H12O5	-H(-)	100	Garbanzol	3,7,4'-Trihydroxyflavanone; Garbanzol		C09751
386	271.061	TRUE	0.867191	26591.6	0.000196058	C15H12O5	-H(-)	100	Pinobanksin	3,5,7-Trihydroxyflavanone; Pinobanksin		C09826
386	271.061	TRUE	0.867191	26591.6	0.000196058	C15H12O5	-H(-)	100	p-Coumaroyltriacetic acid lactone	p-Coumaroyltriacetic acid lactone		C12087
386	271.061	TRUE	0.867191	26591.6	0.000196058	C15H12O5	-H(-)	100	Dihydrogenistein	4',5,7-Trihydroxyisoflavan-4-one; Dihydrogenistein		C14458
386	271.061	TRUE	0.867191	26591.6	0.000196058	C15H12O5	-H(-)	100	2,7,4'-Trihydroxyisoflavanone	2,7,4'-Trihydroxyisoflavanone		C15567
386	271.061	TRUE	0.867191	26591.6	0.000196058	C15H12O5	-H(-)	100	6,7,4'-Trihydroxyflavanone	6,7,4'-Trihydroxyflavanone		C16232
386	271.061	TRUE	0.867191	26591.6	0.000196058	C15H12O5	-H(-)	100	Toralactone	Toralactone		C17673
387	271.113	TRUE	0.942386	20309	-0.000554338	C20H16O	-H(-)	100	1a,11b-Dihydro-4,9-dimethylbenz[a]anthra[3,4-b]oxirene	1a,11b-Dihydro-4,9-dimethylbenz[a]anthra[3,4-b]oxirene		C19489
387	271.113	TRUE	0.942386	20309	-0.000554338	C20H16O	-H(-)	100	7-Hydroxymethyl-12-methylbenz[a]anthracene	12-Methylbenz[a]anthracene-7-methanol; 7-Hydroxymethyl-12-methylbenz[a]anthracene		C19561
387	271.113	TRUE	0.942386	20309	-0.000554338	C20H16O	-H(-)	100	7,12-Dimethylbenz[a]anthracene 5,6-oxide	7,12-Dimethylbenz[a]anthracene 5,6-oxide; DMBA-5,6-epoxide		C19604
387	271.113	TRUE	0.942386	20309	-0.00120292	C12H20N2O3S	-H(-)	72	Sotalol	Sotalol		C07309
388	271.228	TRUE	0.549337	18398.7	0.000334026	C16H32O3	-H(-)	100	16-Hydroxypalmitate	16-Hydroxypalmitate; 16-Hydroxypalmitic acid		C18218
389	272.162	TRUE	0.801704	377838	8.1612e-05	C12H23N3O4	-H(-)	100	(2R,3R)-3-Methylglutamyl-5-semialdehyde-N6-lysine	(2R,3R)-3-Methylglutamyl-5-semialdehyde-N6-lysine		C20279
390	273.121	TRUE	0.895333	76901.9	-0.000174952	C10H18N4O5	-H(-)	100	N2-Succinyl-L-arginine	(2S)-2-(3-Carboxypropanoylamino)-5-(diaminomethylideneamino)pentanoic acid; N2-Succinyl-L-arginine		C03296
391	273.193	TRUE	0.761727	34898.2	0.000164966	C12H26N4O3	-H(-)	100	(2R,3R)-3-Methylornithinyl-N6-lysine	(2R,3R)-3-Methylornithinyl-N6-lysine		C20278
392	274.033	TRUE	0.703926	20593	0.000267149	C6H14NO9P	-H(-)	100	6-Phospho-D-glucosaminate	6-Phospho-D-glucosaminate; D-Glucosaminate-6-phosphate		C20589
393	274.105	TRUE	0.922133	126147	-0.000128721	C10H17N3O6	-H(-)	100	(5-L-Glutamyl)-L-glutamine	(5-L-Glutamyl)-L-glutamine		C05283
393	274.105	TRUE	0.922133	126147	-0.000128721	C10H17N3O6	-H(-)	100	N-Succinyl-L-citrulline	N-Succinyl-L-citrulline		C18048
394	275.201	TRUE	0.806974	7041.01	0.000278214	C18H28O2	-H(-)	100	Stearidonic acid	(6Z,9Z,12Z,15Z)-Octadecatetraenoic acid; 6,9,12,15-Octadecatetraenoic acid; Stearidonic acid		C16300
394	275.201	TRUE	0.806974	7041.01	0.000278214	C18H28O2	-H(-)	100	Kinoprene	Kinoprene		C19042
395	276.051	TRUE	0.776023	23177.8	0.000813458	C9H14N2O6P	-H(-)	100	Pyrimidine 5'-deoxynucleotide	Pyrimidine 5'-deoxynucleotide		C08249
396	276.109	TRUE	0.914961	272188	0.000926859	C12H23NO2S2	-H(-)	100	S-(2-Methylpropanoyl)-dihydrolipoamide	S-(2-Methylpropanoyl)-dihydrolipoamide; S-(2-Methylpropionyl)-dihydrolipoamide		C04424
397	277.112	TRUE	0.951425	47973.5	-0.000881577	C12H22O5S	-H(-)	100	2-(7'-Methylthio)heptylmalic acid	2-(7'-Methylthio)heptylmalate; 2-(7'-Methylthio)heptylmalic acid		C17230
397	277.112	TRUE	0.951425	47973.5	-0.000881577	C12H22O5S	-H(-)	100	3-(7'-Methylthio)heptylmalic acid	3-(7'-Methylthio)heptylmalate; 3-(7'-Methylthio)heptylmalic acid		C17231
398	277.119	TRUE	0.920761	80078.9	0.000585987	C14H18N2O4	-H(-)	100	alpha-Ribazole	N1-(alpha-D-Ribosyl)-5,6-dimethylbenzimidazole; alpha-Ribazole		C05775
398	277.119	TRUE	0.920761	80078.9	0.000585987	C14H18N2O4	-H(-)	100	Oxadixyl	Oxadixyl		C18753
399	277.181	TRUE	0.823022	204518	0.000207031	C17H26O3	-H(-)	100	Panaxytriol	Panaxytriol		C16792
400	277.217	TRUE	0.835086	22707	0.000339888	C18H30O2	-H(-)	100	(6Z,9Z,12Z)-Octadecatrienoic acid	(6Z,9Z,12Z)-Octadecatrienoic acid; 6,9,12-Octadecatrienoic acid; Gamolenic acid; gamma-Linolenic acid		C06426
400	277.217	TRUE	0.835086	22707	0.000339888	C18H30O2	-H(-)	100	(9Z,12Z,15Z)-Octadecatrienoic acid	(9Z,12Z,15Z)-Octadecatrienoic acid; 9,12,15-Octadecatrienoic acid; Linolenate; alpha-Linolenate; alpha-Linolenic acid		C06427
400	277.217	TRUE	0.835086	22707	0.000339888	C18H30O2	-H(-)	100	Crepenynate	(9Z)-Octadec-9-en-12-ynoate; (Z)-9-Octadecen-12-ynoic acid; Crepenynate; Crepenynic acid		C07289
400	277.217	TRUE	0.835086	22707	0.000339888	C18H30O2	-H(-)	100	(9Z,11E,13E)-Octadecatrienoic acid	(9Z,11E,13E)-9,11,13-Octadecatrienoic acid; (9Z,11E,13E)-Octadecatrienoic acid; alpha-Eleostearic acid		C08315
400	277.217	TRUE	0.835086	22707	0.000339888	C18H30O2	-H(-)	100	Punicic acid	Punicic acid; Trichosanic acid; cis-9,trans-11,cis-13-Octadecatrienoic acid		C08364
400	277.217	TRUE	0.835086	22707	0.000339888	C18H30O2	-H(-)	100	5beta-Estrane-3alpha,17beta-diol	19-Nor-5beta-androstane-3alpha,17beta-diol; 5beta-Estrane-3alpha,17beta-diol		C15201
401	278.159	TRUE	0.837461	22819.1	-0.000544597	C16H25NOS	-H(-)	100	Tiocarbazil	Thiocarbazil; Tiocarbazil		C18898
402	279.233	TRUE	0.667688	51313.8	0.00031757	C18H32O2	-H(-)	100	Linoleate	(9Z,12Z)-Octadecadienoic acid; 9-cis,12-cis-Octadecadienoate; 9-cis,12-cis-Octadecadienoic acid; Linoleate; Linoleic acid		C01595
402	279.233	TRUE	0.667688	51313.8	0.00031757	C18H32O2	-H(-)	100	9-cis,11-trans-Octadecadienoate	(9Z,11E)-Octadecadienoic acid; 9-cis,11-trans-Octadecadienoate		C04056
402	279.233	TRUE	0.667688	51313.8	0.00031757	C18H32O2	-H(-)	100	Chaulmoogric acid	Chaulmoogric acid		C08282
402	279.233	TRUE	0.667688	51313.8	0.00031757	C18H32O2	-H(-)	100	Malvalic acid	Malvalic acid		C08321
402	279.233	TRUE	0.667688	51313.8	0.00031757	C18H32O2	-H(-)	100	Stearolic acid	9-Stearolic acid; Stearolic acid		C08459
403	281.052	TRUE	0.939035	46208.5	0.000808549	C10H10N4O6	-H(-)	100	9-Riburonosylhypoxanthine	9-Riburonosylhypoxanthine		C11631
404	281.088	TRUE	0.924374	35975.6	-1.6903e-06	C10H18O9	-H(-)	100	Xylobiose	Xylobiose		C01630
404	281.088	TRUE	0.924374	35975.6	-1.6903e-06	C10H18O9	-H(-)	100	beta-L-Arabinofuranosyl-(1->2)-beta-L-arabinofuranose	beta-L-Arabinofuranosyl-(1->2)-beta-L-arabinofuranose		C20568
404	281.088	TRUE	0.924374	35975.6	-1.6903e-06	C10H18O9	-H(-)	100	alpha-1,5-L-Arabinobiose	alpha-1,5-L-Arabinobiose		C20570
405	281.175	TRUE	0.814976	10131.7	0.000911157	C16H26O4	-H(-)	100	12-trans-Hydroxy juvenile hormone III	12-trans-Hydroxy juvenile hormone III		C16508
406	281.212	TRUE	0.750423	7638.98	-0.000126863	C17H30O3	-H(-)	100	6-Oxabicyclo[3.1.0]hexane-2-undecanoic acid methyl ester	6-Oxabicyclo[3.1.0]hexane-2-undecanoic acid methyl ester		C15465
407	282.039	TRUE	0.861227	27844.7	-0.000781613	C8H14NO8P	-H(-)	100	N2-Acetyl-L-aminoadipyl-delta-phosphate	N2-Acetyl-L-aminoadipyl-delta-phosphate		C12987
407	282.039	TRUE	0.861227	27844.7	0.000103396	C9H18NO3PS2	-H(-)	100	Fosthiazate	Fosthiazate		C18402
408	282.084	TRUE	0.912875	413388	-9.05672e-05	C10H13N5O5	-H(-)	100	Guanosine	Guanosine		C00387
408	282.084	TRUE	0.912875	413388	-9.05672e-05	C10H13N5O5	-H(-)	100	Isoguanosine	Crotonoside; Isoguanosine		C08432
409	283.068	TRUE	0.909535	40261.2	0.000262678	C10H12N4O6	-H(-)	100	Xanthosine	Xanthosine		C01762
410	283.105	TRUE	0.867662	45284.9	0.00020763	C11H16N4O5	-H(-)	100	Coformycin	Coformycin		C01677
411	283.227	TRUE	0.590088	17250.3	0.000526355	C17H32O3	-H(-)	100	2-Methoxy-5Z-hexadecenoic acid	(5Z)-2-Methoxyhexadecenoic acid; 2-Methoxy-5Z-hexadecenoate; 2-Methoxy-5Z-hexadecenoic acid		C13792
411	283.227	TRUE	0.590088	17250.3	0.000526355	C17H32O3	-H(-)	100	2-Methoxy-6Z-hexadecenoic acid	(6Z)-2-Methoxyhexadecenoic acid; 2-Methoxy-6Z-hexadecenoate; 2-Methoxy-6Z-hexadecenoic acid		C13946
411	283.227	TRUE	0.590088	17250.3	0.000526355	C17H32O3	-H(-)	100	12-(2,3-Dihydroxycyclopentyl)-2-dodecanone	12-(2,3-Dihydroxycyclopentyl)-2-dodecanone		C14996
412	284.032	TRUE	0.880959	116824	0.000308069	C15H9O6	-H(-)	100	Riccionidin A	Riccionidin A		C08728
413	284.125	TRUE	0.926611	120778	0.000484738	C12H19N3O5	-H(-)	61	HC Blue No. 2	2,2'-[[4-[(2-Hydroxyethyl)amino]-3-nitrophenyl]imino]bis-ethanol; HC Blue No. 2		C19429
414	284.162	TRUE	0.887009	155847	5.60007e-05	C13H23N3O4	-H(-)	100	Leu-Gly-Pro	Leu-Gly-Pro		C01833
415	285.04	TRUE	0.828768	587228	-3.02746e-05	C15H10O6	-H(-)	100	Luteolin	3',4',5,7-Tetrahydroxyflavone; 5,7,3',4'-Tetrahydroxyflavone; Luteolin		C01514
415	285.04	TRUE	0.828768	587228	-3.02746e-05	C15H10O6	-H(-)	100	Kaempferol	3,4',5,7-Tetrahydroxyflavone; 3,5,7-Trihydroxy-2-(4-hydroxyphenyl)-4H-1-benzopyran-4-one; 5,7,4'-Trihydroxyflavonol; C.I. 75640; Indigo yellow; Kaempferol; Kaempherol; Kempferol; Nimbecetin; Pelargidenolon; Populnetin; Rhamnolutein; Rhamnolutin; Robigenin; Swartziol; Trifolitin		C05903
415	285.04	TRUE	0.828768	587228	-3.02746e-05	C15H10O6	-H(-)	100	Aureusidin	Aureusidin		C08576
415	285.04	TRUE	0.828768	587228	-3.02746e-05	C15H10O6	-H(-)	100	Maritimetin	Maritimetin		C08720
415	285.04	TRUE	0.828768	587228	-3.02746e-05	C15H10O6	-H(-)	100	Datiscetin	3,5,7,2'-Tetrahydroxyflavone; Datiscetin		C10036
415	285.04	TRUE	0.828768	587228	-3.02746e-05	C15H10O6	-H(-)	100	Fisetin	7,3',4'-Trihydroxyflavonol; Fisetin		C10041
415	285.04	TRUE	0.828768	587228	-3.02746e-05	C15H10O6	-H(-)	100	Isoscutellarein	8-Hydroxyapigenin; Isoscutellarein		C10097
415	285.04	TRUE	0.828768	587228	-3.02746e-05	C15H10O6	-H(-)	100	Scutellarein	6-Hydroxyapigenin; Isocarthamidin; Scutellarein		C10184
415	285.04	TRUE	0.828768	587228	-3.02746e-05	C15H10O6	-H(-)	100	Orobol	Orobol		C10510
415	285.04	TRUE	0.828768	587228	-3.02746e-05	C15H10O6	-H(-)	100	2'-Hydroxygenistein	2',4',5,7-Tetrahydroxyisoflavone; 2'-Hydroxygenistein		C12134
415	285.04	TRUE	0.828768	587228	-3.02746e-05	C15H10O6	-H(-)	100	6-Demethoxycapillarisin	6-Demethoxycapillarisin		C17786
415	285.04	TRUE	0.828768	587228	-3.02746e-05	C15H10O6	-H(-)	100	Citreorosein	Citreorosein; omega-Hydroxyemodin		C17810
416	285.207	TRUE	0.845583	19387	0.000224631	C16H30O4	-H(-)	100	2,3-Dihydroxycyclopentaneundecanoic acid	2,3-Dihydroxycyclopentaneundecanoic acid		C14987
416	285.207	TRUE	0.845583	19387	0.000224631	C16H30O4	-H(-)	100	Hexadecanedioate	Hexadecanedioate		C19615
417	286.066	TRUE	0.856995	25547.4	-0.000561575	C14H13N3O2S	-H(-)	100	Sulmazole	Sulmazole		C13749
418	286.104	TRUE	0.946199	49025.7	0.000294259	C11H17N3O6	-H(-)	100	Clavamycin E	Clavamycin E		C17365
419	287.087	TRUE	0.880851	27900.3	0.000866011	C13H21O3PS	-H(-)	100	Iprobenfos	IBP; Iprobenfos; Kitazin P; S-Benzyl O,O-diisopropyl phosphorothioate		C15230
420	289.181	TRUE	0.858074	12928.2	0.000401043	C18H26O3	-H(-)	100	ML-236C	ML-236C		C14043
421	290.088	TRUE	0.942804	165782	-0.000126696	C11H17NO8	-H(-)	100	2,7-Anhydro-alpha-N-acetylneuraminic acid	2,7-Anhydro-alpha-N-acetylneuraminic acid		C04521
421	290.088	TRUE	0.942804	165782	-0.000126696	C11H17NO8	-H(-)	100	2-Deoxy-2,3-dehydro-N-acetylneuraminic acid	2-Deoxy-2,3-dehydro-N-acetylneuraminic acid		C04580
421	290.088	TRUE	0.942804	165782	-0.000126696	C11H17NO8	-H(-)	100	Sarmentosin epoxide	Sarmentosin epoxide		C08341
422	291.015	TRUE	0.839567	41476.2	0.00081829	C14H12O3S2	-H(-)	100	5-(3-Hydroxy-4-acetoxybut-1-ynyl)-2,2'-bithiophene	5-(3-Hydroxy-4-acetoxybut-1-ynyl)-2,2'-bithiophene		C04711
423	291.057	TRUE	0.679807	22480	0.000864096	C10H17N2O4PS	-H(-)	100	Etrimfos	Etrimfos		C18985
424	291.195	TRUE	0.670367	10245	0.00111957	C18H28O3	-H(-)	82	12-OPDA	(15Z)-12-Oxophyto-10,15-dienoate; (15Z)-12-Oxophyto-10,15-dienoic acid; 12-OPDA; 12-Oxo-10,15(Z)-phytodienoic acid; 9(S),13(S)-12-Oxo-PDA		C01226
424	291.195	TRUE	0.670367	10245	0.00111957	C18H28O3	-H(-)	82	(9Z,15Z)-(13S)-12,13-Epoxyoctadeca-9,11,15-trienoic acid	(9Z)-(13S)-12,13-Epoxyoctadeca-9,11,15-trienoate; (9Z,15Z)-(13S)-12,13-Epoxyoctadeca-9,11,15-trienoate; (9Z,15Z)-(13S)-12,13-Epoxyoctadeca-9,11,15-trienoic acid; 12,13(S)-EOT; 12,13(S)-EOTrE		C04672
424	291.195	TRUE	0.670367	10245	0.00111957	C18H28O3	-H(-)	82	alpha-Licanic acid	(9Z,11E,13E)-4-Oxooctadeca-9,11,13-trienoic acid; 4-Oxo-9,11,13-octadecatrienoic acid; 4-Oxo-cis-9,trans-11,trans-13-octadecatrienoic acid; alpha-Licanic acid		C08319
424	291.195	TRUE	0.670367	10245	0.00111957	C18H28O3	-H(-)	82	(9R,13R)-12-Oxo-phytodienoic acid	(10Z,15Z)-(9R,13R)-12-Oxophyto-10,15-dienoic acid; (9R,13R)-12-Oxo-phyto-10Z,15Z-dienoic acid; (9R,13R)-12-Oxo-phytodienoic acid		C13816
424	291.195	TRUE	0.670367	10245	0.00111957	C18H28O3	-H(-)	82	17beta-Hydroxy-2-oxa-5alpha-androstan-3-one	17beta-Hydroxy-2-oxa-5alpha-androstan-3-one		C14911
424	291.195	TRUE	0.670367	10245	0.00111957	C18H28O3	-H(-)	82	Etherolenic acid	(9Z,11E,1'E,3'Z)-12-(1',3'-Hexadienyloxy)-9,11-dodecadienoic acid; Etherolenic acid		C16319
424	291.195	TRUE	0.670367	10245	0.00111957	C18H28O3	-H(-)	82	Colnelenic acid	(8E)-9-[(1E,3Z,6Z)-Nona-1,3,6-trien-1-yloxy]non-8-enoate; Colnelenic acid		C16320
424	291.195	TRUE	0.670367	10245	0.00111957	C18H28O3	-H(-)	82	9,10-EOT	(9S)-(10E,12Z,15Z)-9,10-Epoxyoctadecatri-10,12,15-enoic acid; 9,10-EOT; 9,10-EOTrE; 9,10-Epoxyoctadecatrienoic acid		C16324
424	291.195	TRUE	0.670367	10245	0.00111957	C18H28O3	-H(-)	82	10-OPDA	(11Z,15Z)-10-Oxo-11,15-phytodienoic acid; 10-OPDA; 10-Oxo-11,15-phytodienoic acid		C16325
425	292.104	TRUE	0.926643	45593.9	-0.000159376	C11H19NO8	-H(-)	100	N-Acetylmuramate	N-Acetyl-D-muramoate; N-Acetylmuramate; N-Acetylmuramic acid		C02713
426	293.099	TRUE	0.951153	216149	4.24359e-05	C10H18N2O8	-H(-)	100	N-Glycosyl-L-asparagine	N-Glycosyl-L-asparagine		C03411
427	293.115	TRUE	0.945405	59573.1	-0.00120881	C14H18N2O5	-H(-)	71	Aspartame	Aspartame		C11045
428	293.176	TRUE	0.862162	60672.6	-1.22268e-05	C17H26O4	-H(-)	100	Phytuberin	Phytuberin		C09709
428	293.176	TRUE	0.862162	60672.6	-1.22268e-05	C17H26O4	-H(-)	100	Embelin	Embelin		C10342
428	293.176	TRUE	0.862162	60672.6	-1.22268e-05	C17H26O4	-H(-)	100	[6]-Gingerol	(S)-(+)-[6]Gingerol; 6-Gingerol; [6]-Gingerol		C10462
429	293.212	TRUE	0.841334	20612.2	0.000370649	C18H30O3	-H(-)	100	(9Z)-(13S)-12,13-Epoxyoctadeca-9,11-dienoic acid	(9Z)-(13S)-12,13-Epoxyoctadeca-9,11-dienoate; (9Z)-(13S)-12,13-Epoxyoctadeca-9,11-dienoic acid; 13(S)-EOD		C04594
429	293.212	TRUE	0.841334	20612.2	0.000370649	C18H30O3	-H(-)	100	8-[(1R,2R)-3-Oxo-2-{(Z)-pent-2-enyl}cyclopentyl]octanoate	8-[(1R,2R)-3-Oxo-2-{(Z)-pent-2-enyl}cyclopentyl]octanoate; OPC-8:0		C04780
429	293.212	TRUE	0.841334	20612.2	0.000370649	C18H30O3	-H(-)	100	8-(5-Hexyl-furan-2-yl)-octanoic acid	8-(5-Hexyl-furan-2-yl)-octanoate; 8-(5-Hexyl-furan-2-yl)-octanoic acid		C13798
429	293.212	TRUE	0.841334	20612.2	0.000370649	C18H30O3	-H(-)	100	13-OxoODE	(9Z,11E)-13-Oxooctadeca-9,11-dienoic acid; 13-KODE; 13-OxoODE		C14765
429	293.212	TRUE	0.841334	20612.2	0.000370649	C18H30O3	-H(-)	100	9-OxoODE	(10E,12Z)-9-Oxooctadeca-10,12-dienoic acid; 9-KODE; 9-OxoODE		C14766
429	293.212	TRUE	0.841334	20612.2	0.000370649	C18H30O3	-H(-)	100	13(S)-HOT	(9Z,11E,13S,15Z)-13-Hydroxyoctadeca-9,11,15-trienoic acid; (9Z,11E,15Z)-(13S)-13-Hydroxyoctadeca-9,11,15-trienoic acid; (9Z,11E,15Z)-(13S)-Hydroxyoctadeca-9,11,15-trienoate; 13(S)-HOT; 13(S)-HOTrE		C16316
429	293.212	TRUE	0.841334	20612.2	0.000370649	C18H30O3	-H(-)	100	9(S)-HOT	(9S)-(10E,12Z,15Z)-9-Hydroxyoctadecatri-10,12,15-enoic acid; 9(S)-HOT; 9(S)-HOTrE		C16326
429	293.212	TRUE	0.841334	20612.2	0.000370649	C18H30O3	-H(-)	100	2(R)-HOT	(2R)-(9Z,12Z,15Z)-2-Hydroxyoctadecatri-9,12,15-enoic acid; 2(R)-HOT; 2(R)-HOTrE		C16342
429	293.212	TRUE	0.841334	20612.2	0.000370649	C18H30O3	-H(-)	100	17-Hydroxylinolenic acid	(9Z,12Z,15Z)-17-Hydroxyoctadecatri-9,12,15-enoic acid; 17-Hydroxylinolenic acid		C16346
429	293.212	TRUE	0.841334	20612.2	0.000370649	C18H30O3	-H(-)	100	Juvenile hormone I	Juvenile hormone I		C19613
429	293.212	TRUE	0.841334	20612.2	0.000370649	C18H30O3	-H(-)	100	Colneleate	(8E)-9-[(1E,3Z)-Nona-1,3-dien-1-yloxy]non-8-enoate; Colneleate		C19827
430	295.227	TRUE	0.835244	74447.3	0.000386387	C18H32O3	-H(-)	100	(9Z,12Z)-(8R)-Hydroxyoctadeca-9,12-dienoic acid	(9Z,12Z)-(8R)-Hydroxyoctadeca-9,12-dienoic acid; 8-Hydroxylinoleic acid; Laetisaric acid		C08318
430	295.227	TRUE	0.835244	74447.3	0.000386387	C18H32O3	-H(-)	100	Vernolic acid	(9Z)-(12S,13R)-12,13-Epoxyoctadecenoic acid; Vernolic acid; cis-12,13-Epoxy-cis-9-octadecenoic acid		C08368
430	295.227	TRUE	0.835244	74447.3	0.000386387	C18H32O3	-H(-)	100	13(S)-HODE	(13S)-Hydroxyoctadecadienoic acid; (9Z,11E)-(13S)-13-Hydroxyoctadeca-9,11-dienoic acid; 13(S)-HODE		C14762
430	295.227	TRUE	0.835244	74447.3	0.000386387	C18H32O3	-H(-)	100	9(S)-HODE	(10E,12Z)-(9S)-9-Hydroxyoctadeca-10,12-dienoic acid; (9S)-Hydroxyoctadecadienoic acid; 9(S)-HODE		C14767
430	295.227	TRUE	0.835244	74447.3	0.000386387	C18H32O3	-H(-)	100	9(10)-EpOME	(9R,10S)-(12Z)-9,10-Epoxyoctadecenoic acid; 9(10)-EpOME		C14825
430	295.227	TRUE	0.835244	74447.3	0.000386387	C18H32O3	-H(-)	100	12(13)-EpOME	(12R,13S)-(9Z)-12,13-Epoxyoctadecenoic acid; 12(13)-EpOME		C14826
430	295.227	TRUE	0.835244	74447.3	0.000386387	C18H32O3	-H(-)	100	18-Oxooleate	18-Oxooleate		C19617
431	296.072	TRUE	0.902813	151195	-0.000996796	C12H15N3O4S	-H(-)	100	Albendazole sulfone	Albendazole sulfone		C16626
431	296.072	TRUE	0.902813	151195	-0.000346218	C20H11NO2	-H(-)	100	6-Nitrobenzo[a]pyrene	6-Nitrobenzo[a]pyrene		C19472
431	296.072	TRUE	0.902813	151195	-0.000346218	C20H11NO2	-H(-)	100	3-Nitroperylene	3-Nitroperylene		C19475
432	297.022	TRUE	0.887623	11964.3	0.000380805	C16H10O4S	-H(-)	100	1-Pyrenylsulfate	1-Pyrenylsulfate		C18269
433	297.062	TRUE	0.842098	32582.3	-0.000298309	C13H14O8	-H(-)	100	D-Prephenyllactate	D-Prephenyllactate		C00994
434	297.107	TRUE	0.92795	30171.3	-0.000518131	C17H18N2OS	-H(-)	100	10-(beta-Dimethylaminopropionyl)phenothiazine	10-(beta-Dimethylaminopropionyl)phenothiazine		C17619
434	297.107	TRUE	0.92795	30171.3	0.000641537	C11H16N5O5	-H(-)	100	N7-Methylguanosine	N7-Methylguanosine		C20674
435	297.243	TRUE	0.841067	209635	0.000429237	C18H34O3	-H(-)	100	2-Oxooctadecanoic acid	2-Oxooctadecanoic acid; 2-Oxostearate		C00869
435	297.243	TRUE	0.841067	209635	0.000429237	C18H34O3	-H(-)	100	Ricinoleic acid	(9Z)-(12R)-Hydroxyoctadecenoic acid; 12-Hydroxy-9-octadecenoic acid; 12-Hydroxy-cis-9-octadecenoic acid; Ricinoleic acid		C08365
435	297.243	TRUE	0.841067	209635	0.000429237	C18H34O3	-H(-)	100	(6R,7S)-6,7-Epoxyoctadecanoic acid	(6R,7S)-6,7-Epoxyoctadecanoic acid; 6R,7S-Epoxy-octadecanoate; 6R,7S-Epoxy-octadecanoic acid		C13791
435	297.243	TRUE	0.841067	209635	0.000429237	C18H34O3	-H(-)	100	cis-9,10-Epoxystearic acid	cis-9,10-Epoxystearic acid		C19418
435	297.243	TRUE	0.841067	209635	0.000429237	C18H34O3	-H(-)	100	18-Hydroxyoleate	18-Hydroxyoleate		C19616
436	298.071	TRUE	0.84363	17719.2	-0.000837821	C9H18NO8P	-H(-)	100	D-4'-Phosphopantothenate	(R)-4'-Phosphopantothenate; D-4'-Phosphopantothenate		C03492
437	298.091	TRUE	0.867616	18030.6	0.000540913	C11H15N4O6	-H(-)	100	7-Methylxanthosine	7-Methylxanthosine		C16352
438	299.019	TRUE	0.849608	63081.9	0.0005554	C15H8O7	-H(-)	100	Pseudopurpurin	Pseudopurpurin		C10394
439	299.055	TRUE	0.903835	16054.4	0.000645976	C16H12O6	-H(-)	100	Chrysoeriol	3'-O-Methylluteolin; 5,7,4'-Trihydroxy-3'-methoxyflavone; Chrysoeriol		C04293
439	299.055	TRUE	0.903835	16054.4	0.000645976	C16H12O6	-H(-)	100	3-Methoxyapigenin	3-Methoxyapigenin; 3-O-Methylkaempferol		C05902
439	299.055	TRUE	0.903835	16054.4	0.000645976	C16H12O6	-H(-)	100	Leptosidin	Leptosidin		C08651
439	299.055	TRUE	0.903835	16054.4	0.000645976	C16H12O6	-H(-)	100	Diosmetin	Diosmetin; Luteolin 4'-methyl ether		C10038
439	299.055	TRUE	0.903835	16054.4	0.000645976	C16H12O6	-H(-)	100	Hispidulin	Dinatin; Hispidulin; Scutellarein 6-methyl ether		C10058
439	299.055	TRUE	0.903835	16054.4	0.000645976	C16H12O6	-H(-)	100	Kaempferide	Kaempferide; Kaempferol 4'-methyl ether; Kempferide		C10098
439	299.055	TRUE	0.903835	16054.4	0.000645976	C16H12O6	-H(-)	100	Cajanin	Cajanin		C10203
439	299.055	TRUE	0.903835	16054.4	0.000645976	C16H12O6	-H(-)	100	Pratensein	Pratensein		C10520
439	299.055	TRUE	0.903835	16054.4	0.000645976	C16H12O6	-H(-)	100	Tectorigenin	Tectorigenin		C10534
439	299.055	TRUE	0.903835	16054.4	0.000645976	C16H12O6	-H(-)	100	2'-Hydroxybiochanin A	2'-Hydroxybiochanin A; Dehydroferreirin		C12135
439	299.055	TRUE	0.903835	16054.4	0.000645976	C16H12O6	-H(-)	100	(+)-Sophorol	(+)-Sophorol		C16227
439	299.055	TRUE	0.903835	16054.4	0.000645976	C16H12O6	-H(-)	100	(-)-Sophorol	(-)-Sophorol		C16228
439	299.055	TRUE	0.903835	16054.4	0.000645976	C16H12O6	-H(-)	100	(+)-6a-Hydroxymaackiain	(+)-6a-Hydroxymaackiain		C16230
439	299.055	TRUE	0.903835	16054.4	0.000645976	C16H12O6	-H(-)	100	Rhamnocitrin	3,4',5-Trihydroxy-7-methoxyflavone; 7-Methylkaempferol; Rhamnocitrin		C17059
439	299.055	TRUE	0.903835	16054.4	0.000645976	C16H12O6	-H(-)	100	Questinol	1,6-Dihydroxy-3-(hydroxymethyl)-8-methoxy-9,10-anthracenedione; Questinol		C17811
440	299.076	TRUE	0.81593	23895.7	-0.000280406	C7H17N4O7P	-H(-)	100	1D-1-Guanidino-3-amino-1,3-dideoxy-scyllo-inositol 4-phosphate	1D-1-Guanidino-3-amino-1,3-dideoxy-scyllo-inositol 4-phosphate		C04812
440	299.076	TRUE	0.81593	23895.7	-0.000280406	C7H17N4O7P	-H(-)	100	N1-Amidinostreptamine 6-phosphate	1D-1-Guanidino-3-amino-1,3-dideoxy-scyllo-inositol 6-phosphate; N1-Amidinostreptamine 6-phosphate		C11351
440	299.076	TRUE	0.81593	23895.7	0.000757191	C13H16O8	-H(-)	100	4-(beta-D-Glucosyloxy)benzoate	4-(beta-D-Glucosyloxy)benzoate; 4-Hydroxybenzoate-O-glucoside		C03993
441	299.259	TRUE	0.340735	30178.8	0.000228047	C18H36O3	-H(-)	100	(R)-2-Hydroxystearate	(R)-2-Hydroxystearate		C03042
441	299.259	TRUE	0.340735	30178.8	0.000228047	C18H36O3	-H(-)	100	(S)-2-Hydroxystearate	(S)-2-Hydroxystearate		C03045
441	299.259	TRUE	0.340735	30178.8	0.000228047	C18H36O3	-H(-)	100	(R)-10-Hydroxystearate	(R)-10-Hydroxystearate		C03195
442	300.049	TRUE	0.942052	29856.3	0.000409138	C8H16NO9P	-H(-)	100	N-Acetyl-D-glucosamine 6-phosphate	N-Acetyl-D-glucosamine 6-phosphate		C00357
442	300.049	TRUE	0.942052	29856.3	0.000409138	C8H16NO9P	-H(-)	100	N-Acetyl-D-glucosamine 1-phosphate	N-Acetyl-D-glucosamine 1-phosphate		C04256
442	300.049	TRUE	0.942052	29856.3	0.000409138	C8H16NO9P	-H(-)	100	N-Acetyl-D-mannosamine 6-phosphate	N-Acetyl-D-mannosamine 6-phosphate; N-Acetylmannosamine 6-phosphate		C04257
442	300.049	TRUE	0.942052	29856.3	0.000409138	C8H16NO9P	-H(-)	100	N-Acetyl-alpha-D-glucosamine 1-phosphate	N-Acetyl-alpha-D-glucosamine 1-phosphate		C04501
442	300.049	TRUE	0.942052	29856.3	0.000409138	C8H16NO9P	-H(-)	100	N-Acetyl-D-galactosamine 6-phosphate	N-Acetyl-D-galactosamine 6-phosphate		C06376
442	300.049	TRUE	0.942052	29856.3	0.000409138	C8H16NO9P	-H(-)	100	N-Acetyl-alpha-D-hexosamine 1-phosphate	N-Acetyl-alpha-D-hexosamine 1-phosphate		C18055
442	300.049	TRUE	0.942052	29856.3	0.000409138	C8H16NO9P	-H(-)	100	N-Acetyl-alpha-D-galactosamine 1-phosphate	N-Acetyl-alpha-D-galactosamine 1-phosphate		C18060
443	300.156	TRUE	0.934445	171506	0.00017971	C13H23N3O5	-H(-)	100	(Ac)2-L-Lys-D-Ala	(Ac)2-L-Lys-D-Ala; (Ac)2-L-lysyl-D-alanine		C02487
444	301.036	TRUE	0.845357	516084	-0.000154856	C15H10O7	-H(-)	100	Quercetin	3,3',4,5,7-Pentahydroxyflavone; 3,5,7,3',4'-Pentahydroxyflavone; Quercetin		C00389
444	301.036	TRUE	0.845357	516084	-0.000154856	C15H10O7	-H(-)	100	8-Hydroxykaempferol	8-Hydroxykaempferol		C02806
444	301.036	TRUE	0.845357	516084	-0.000154856	C15H10O7	-H(-)	100	2'-Hydroxypseudobaptigenin	2'-Hydroxypseudobaptigenin		C03662
444	301.036	TRUE	0.845357	516084	-0.000154856	C15H10O7	-H(-)	100	Bracteatin	Bracteatin		C08577
444	301.036	TRUE	0.845357	516084	-0.000154856	C15H10O7	-H(-)	100	6-Hydroxykaempferol	6-Hydroxykaempferol		C10068
444	301.036	TRUE	0.845357	516084	-0.000154856	C15H10O7	-H(-)	100	6-Hydroxyluteolin	5,6,7,3',4'-Pentahydroxyflavone; 6-Hydroxyluteolin		C10072
444	301.036	TRUE	0.845357	516084	-0.000154856	C15H10O7	-H(-)	100	Hypolaetin	8-Hydroxyluteolin; Hypolaetin		C10078
444	301.036	TRUE	0.845357	516084	-0.000154856	C15H10O7	-H(-)	100	Isoetin	5,7,2',4',5'-Pentahydroxyflavone; Isoetin		C10079
444	301.036	TRUE	0.845357	516084	-0.000154856	C15H10O7	-H(-)	100	Morin	3,5,7,2',4'-Pentahydroxyflavone; C.I.Natural Yellow 8; Morin		C10105
444	301.036	TRUE	0.845357	516084	-0.000154856	C15H10O7	-H(-)	100	Robinetin	5-Deoxymyricetin; Robinetin		C10177
444	301.036	TRUE	0.845357	516084	-0.000154856	C15H10O7	-H(-)	100	Tricetin	5,7,3',4',5'-Pentahydroxyflavone; Tricetin		C10192
444	301.036	TRUE	0.845357	516084	-0.000154856	C15H10O7	-H(-)	100	2-(4-Hydroxyphenyl)-5,6,7,8-tetrahydroxy-4H-1-benzopyran-4-one	2-(4-Hydroxyphenyl)-5,6,7,8-tetrahydroxy-4H-1-benzopyran-4-one; 5,6,7,8,4'-Pentahydroxyflavone; Nortangeretin		C15031
445	301.166	TRUE	0.733356	55096.3	0.000147817	C15H26O6	-H(-)	100	Tributyrin	Glycerol tributyrate; Glyceryl tributyrate; Tributyrin		C13870
446	302.1	TRUE	0.831495	35317.2	-0.000794001	C11H17N3O7	-H(-)	100	11-Deoxytetrodotoxin	11-Deoxytetrodotoxin		C20026
447	302.136	TRUE	0.930434	154679	9.76511e-05	C12H21N3O6	-H(-)	100	Nicotianamine	Nicotianamine		C05324
448	303.051	TRUE	0.832623	20276.5	0.000375188	C15H12O7	-H(-)	100	Taxifolin	(+)-Dihydroquercetin; (+)-Taxifolin; Dihydroquercetin; Taxifolin; trans-Dihydroquercetin		C01617
448	303.051	TRUE	0.832623	20276.5	0.000375188	C15H12O7	-H(-)	100	Pentahydroxyflavanone	Dihydrotricetin; Pentahydroxyflavanone		C05911
448	303.051	TRUE	0.832623	20276.5	0.000375188	C15H12O7	-H(-)	100	cis-Dihydroquercetin	cis-Dihydroquercetin		C12316
449	304.034	TRUE	0.961595	74723.1	5.12675e-05	C9H12N3O7P	-H(-)	100	3',5'-Cyclic CMP	3',5'-Cyclic CMP; Cytidine 3',5'-cyclic monophosphate		C00941
449	304.034	TRUE	0.961595	74723.1	5.12675e-05	C9H12N3O7P	-H(-)	100	2',3'-Cyclic CMP	2',3'-Cyclic CMP		C02354
450	304.089	TRUE	0.949721	31869.9	0.000265834	C11H20N3O3PS	-H(-)	100	Pirimiphos-methyl	Pirimiphos-methyl; Pirimiphosmethyl		C18403
451	305.018	TRUE	0.974597	95607.7	5.91343e-05	C9H11N2O8P	-H(-)	100	2',3'-Cyclic UMP	2',3'-Cyclic UMP		C02355
452	305.175	TRUE	0.873109	9886.71	0.000900887	C18H26O4	-H(-)	100	Compactin diol lactone	Compactin diol lactone; ML-236A		C14183
452	305.175	TRUE	0.873109	9886.71	0.000900887	C18H26O4	-H(-)	100	Di-n-pentyl phthalate	Di-n-pentyl phthalate; Diamyl phthalate		C14300
452	305.175	TRUE	0.873109	9886.71	0.000900887	C18H26O4	-H(-)	100	Capsiate	Capsiate		C20203
453	305.212	TRUE	0.448064	5434.15	8.4672e-05	C19H30O3	-H(-)	100	Oxandrolone	Oxandrolone		C07346
453	305.212	TRUE	0.448064	5434.15	8.4672e-05	C19H30O3	-H(-)	100	3alpha,11beta-Dihydroxy-5beta-androstane-17-one	11beta-Hydroxyetiocholanolone; 3alpha,11beta-Dihydroxy-5beta-androstane-17-one		C14553
453	305.212	TRUE	0.448064	5434.15	8.4672e-05	C19H30O3	-H(-)	100	3alpha,11beta-Dihydroxy-5alpha-androstane-17-one	11beta-Hydroxyandrosterone; 3alpha,11beta-Dihydroxy-5alpha-androstane-17-one		C14606
453	305.212	TRUE	0.448064	5434.15	8.4672e-05	C19H30O3	-H(-)	100	Androst-5-ene-3beta,17beta,19-triol	Androst-5-ene-3beta,17beta,19-triol		C15097
453	305.212	TRUE	0.448064	5434.15	8.4672e-05	C19H30O3	-H(-)	100	3beta-Hydroxy-D-homo-17a-oxa-5alpha-androstan-17-one	3beta-Hydroxy-D-homo-17a-oxa-5alpha-androstan-17-one; Isoandrololactone		C15136
453	305.212	TRUE	0.448064	5434.15	8.4672e-05	C19H30O3	-H(-)	100	Dihydromonacolin L	Dihydromonacolin L		C15536
454	306.076	TRUE	0.889493	45779	5.53832e-05	C10H17N3O6S	-H(-)	100	Glutathione	5-L-Glutamyl-L-cysteinylglycine; GSH; Glutathione; N-(N-gamma-L-Glutamyl-L-cysteinyl)glycine; Reduced glutathione; gamma-L-Glutamyl-L-cysteinyl-glycine		C00051
454	306.076	TRUE	0.889493	45779	0.000690197	C18H13NO4	-H(-)	100	Stealthin C	Stealthin C		C12392
455	306.113	TRUE	0.907661	24298.9	0.000936055	C19H17NO3	-H(-)	100	Cusparine	Cusparine		C10655
455	306.113	TRUE	0.907661	24298.9	0.000936055	C19H17NO3	-H(-)	100	Rutacridone	Rutacridone		C10738
455	306.113	TRUE	0.907661	24298.9	0.000936055	C19H17NO3	-H(-)	100	LY 294002	2-(4-Morpholinyl)-8-phenyl-4H-1-benzopyran-4-one; LY 294002		C15195
456	307.151	TRUE	0.885461	57645	0.000126511	C12H24N2O7	-H(-)	100	Fructoselysine	Fructoselysine		C16488
457	307.167	TRUE	0.873735	9987.89	-0.000196192	C16H24N2O4	-H(-)	100	Ubenimex	Ubenimex		C00732
458	307.191	TRUE	0.859219	15534.3	0.000772592	C18H28O4	-H(-)	100	5-O-Methylembelin	5-O-Methylembelin		C10373
458	307.191	TRUE	0.859219	15534.3	0.000772592	C18H28O4	-H(-)	100	Soraphen O	Soraphen O		C15818
459	308.099	TRUE	0.784363	278899	7.23586e-05	C11H19NO9	-H(-)	100	N-Acetylneuraminate	5-Acetamido-3,5-dideoxy-D-glycero-D-galacto-2-nonulosonic acid; N-Acetylneuraminate; N-Acetylneuraminic acid; Neu5Ac		C00270
459	308.099	TRUE	0.784363	278899	7.23586e-05	C11H19NO9	-H(-)	100	O-Acetylneuraminic acid	O-Acetylated sialic acid; O-Acetylneuraminic acid		C03525
459	308.099	TRUE	0.784363	278899	7.23586e-05	C11H19NO9	-H(-)	100	N-Acetyl-alpha-neuraminate	N-Acetyl-alpha-neuraminate; alpha-Neu5Ac		C19909
459	308.099	TRUE	0.784363	278899	7.23586e-05	C11H19NO9	-H(-)	100	N-Acetyl-beta-neuraminate	N-Acetyl-beta-neuraminate; beta-Neu5Ac		C19910
460	308.161	TRUE	0.941518	52560.1	0.000462512	C15H23N3O4	-H(-)	100	Isopropalin	Isopropalin		C19063
461	309.041	TRUE	0.864531	66415	-0.000525552	C17H10O6	-H(-)	100	6-Demethylsterigmatocystin	6-Demethylsterigmatocystin		C03683
462	309.172	TRUE	0.864732	30613.6	-0.00124876	C17H26O5	-H(-)	67	Botrydial	Botrydial		C09622
463	309.207	TRUE	0.87111	27049.2	0.000227311	C18H30O4	-H(-)	100	13(S)-HPOT	(9Z,11E,15Z)-(13S)-13-Hydroperoxyoctadeca-9,11,15-trienoic acid; (9Z,11E,15Z)-(13S)-Hydroperoxyoctadeca-9,11,15-trienoate; 13(S)-HPOT; 13(S)-HpOTrE; 13-HPOT		C04785
463	309.207	TRUE	0.87111	27049.2	0.000227311	C18H30O4	-H(-)	100	(9Z,12Z,15Z)-(7S,8S)-Dihydroxyoctadeca-9,12,15-trienoic acid	(9Z,12Z,15Z)-(7S,8S)-Dihydroxyoctadeca-9,12,15-trienoate; (9Z,12Z,15Z)-(7S,8S)-Dihydroxyoctadeca-9,12,15-trienoic acid		C07357
463	309.207	TRUE	0.87111	27049.2	0.000227311	C18H30O4	-H(-)	100	Dihydroalbocycline	Dihydroalbocycline		C15753
463	309.207	TRUE	0.87111	27049.2	0.000227311	C18H30O4	-H(-)	100	9(S)-HPOT	(10E,12Z,15Z)-(9S)-9-Hydroperoxyoctadeca-10,12,15-trienoic acid; (9S,10E,12Z,15Z)-9-Hydroperoxy-10,12,15-octadecatrienoate; 9(S)-HPOT; 9(S)-HpOTrE		C16321
463	309.207	TRUE	0.87111	27049.2	0.000227311	C18H30O4	-H(-)	100	2(R)-HPOT	(2R)-(9Z,12Z,15Z)-2-Hydroperoxyoctadecatri-9,12,15-enoic acid; 2(R)-HPOT; 2(R)-HpOTrE		C16341
463	309.207	TRUE	0.87111	27049.2	0.000227311	C18H30O4	-H(-)	100	(9R,10E,12Z,15Z)-9-Hydroperoxyoctadeca-10,12,15-trienoate	(9R,10E,12Z,15Z)-9-Hydroperoxyoctadeca-10,12,15-trienoate		C19936
463	309.207	TRUE	0.87111	27049.2	0.000227311	C18H30O4	-H(-)	100	(8E,10S,12Z,15Z)-10-Hydroperoxyoctadeca-8,12,15-trienoate	(8E,10S,12Z,15Z)-10-Hydroperoxyoctadeca-8,12,15-trienoate		C20704
464	309.28	TRUE	0.611753	9785.61	0.00031494	C20H38O2	-H(-)	100	Prostanoic acid	Prostanoic acid		C02064
464	309.28	TRUE	0.611753	9785.61	0.00031494	C20H38O2	-H(-)	100	Icosenoic acid	(11Z)-Eicosenoic acid; (11Z)-Icosenoic acid; (Z)-Icosa-11-enoic acid; 11-Eicosenoic acid; 11-Icosenoic acid; Eicosenoic acid; Icosenoic acid		C16526
465	311.099	TRUE	0.88627	30186.5	-0.000272613	C11H20O10	-H(-)	100	Vicianose	O-alpha-L-Arabinopyranosyl-(1-6)-D-glucopyranose; Vicianose		C01625
465	311.099	TRUE	0.88627	30186.5	-0.000272613	C11H20O10	-H(-)	100	Arabino-galactose	Arabino-galactose		C07285
465	311.099	TRUE	0.88627	30186.5	-0.000272613	C11H20O10	-H(-)	100	6-O-beta-D-Xylopyranosyl-D-glucose	6-O-beta-D-Xylopyranosyl-D-glucose; Primeverose		C08245
465	311.099	TRUE	0.88627	30186.5	-0.000272613	C11H20O10	-H(-)	100	6-O-(beta-D-Xylopyranosyl)-beta-D-glucopyranose	6-O-(beta-D-Xylopyranosyl)-beta-D-glucopyranose; beta-Primeverose		C11535
466	311.223	TRUE	0.877561	101328	0.000260252	C18H32O4	-H(-)	100	(9Z,11E)-(13S)-13-Hydroperoxyoctadeca-9,11-dienoic acid	(9Z,11E)-(13S)-13-Hydroperoxyoctadeca-9,11-dienoate; (9Z,11E)-(13S)-13-Hydroperoxyoctadeca-9,11-dienoic acid; 13(S)-HPODE; 13S-Hydroperoxy-9Z,11E-octadecadienoic acid		C04717
466	311.223	TRUE	0.877561	101328	0.000260252	C18H32O4	-H(-)	100	(9Z,12Z)-(11S)-11-Hydroperoxyoctadeca-9,12-dienoic acid	(9Z,12Z)-(11S)-11-Hydroperoxyoctadeca-9,12-dienoate; (9Z,12Z)-(11S)-11-Hydroperoxyoctadeca-9,12-dienoic acid		C07338
466	311.223	TRUE	0.877561	101328	0.000260252	C18H32O4	-H(-)	100	(7S,8S)-DiHODE	(7S,8S)-DiHODE; (7S,8S,9Z,12Z)-7,8-Dihydroxyoctadeca-9,12-dienoate; (9Z,12Z)-(7S,8S)-Dihydroxyoctadeca-9,12-dienoic acid		C07354
466	311.223	TRUE	0.877561	101328	0.000260252	C18H32O4	-H(-)	100	9(S)-HPODE	(10E,12Z)-(9S)-9-Hydroperoxyoctadeca-10,12-dienoic acid; (9S,10E,12Z)-9-Hydroperoxy-10,12-octadecadienoate; 9(S)-HPOD; 9(S)-HPODE		C14827
466	311.223	TRUE	0.877561	101328	0.000260252	C18H32O4	-H(-)	100	8(R)-HPODE	(8R,9Z,12Z)-8-Hydroperoxyoctadeca-9,12-dienoate; (9Z,12Z)-(8R)-8-Hydroperoxyoctadeca-9,12-dienoic acid; 8(R)-HPODE		C14831
466	311.223	TRUE	0.877561	101328	0.000260252	C18H32O4	-H(-)	100	12,13-Epoxy-9-hydroxy-10-octadecenoate	(10E)-(9S,12R,13S)-12,13-Epoxy-9-hydroxyoctadec-10-enoic acid; 12(R),13(S)-Epoxy-9(S)-hydroxy-10(E)-octadecenoic acid; 12,13-Epoxy-9-hydroxy-10-octadecenoate		C14832
466	311.223	TRUE	0.877561	101328	0.000260252	C18H32O4	-H(-)	100	9,10-Epoxy-13-hydroxy-11-octadecenoate	(11E)-9,10-Epoxyoctadecenoic acid; 9,10-Epoxy-13-hydroxy-11-octadecenoate		C14834
466	311.223	TRUE	0.877561	101328	0.000260252	C18H32O4	-H(-)	100	9,10-12,13-Diepoxyoctadecanoate	9,10-12,13-Diepoxyoctadecanoate; 9,10-12,13-Diepoxyoctadecanoic acid		C14836
466	311.223	TRUE	0.877561	101328	0.000260252	C18H32O4	-H(-)	100	Octadec-9-ene-1,18-dioic-acid	Octadec-9-ene-1,18-dioic-acid		C19618
466	311.223	TRUE	0.877561	101328	0.000260252	C18H32O4	-H(-)	100	(8E,10R,12Z)-10-Hydroperoxy-8,12-octadecadienoate	(8E,10R,12Z)-10-Hydroperoxy-8,12-octadecadienoate		C19937
466	311.223	TRUE	0.877561	101328	0.000260252	C18H32O4	-H(-)	100	5S,8R-DiHODE	(5S,8R)-DiHODE; (5S,8R,9Z,12Z)-5,8-Dihydroxyoctadeca-9,12-dienoate; 5S,8R-DiHODE		C20186
466	311.223	TRUE	0.877561	101328	0.000260252	C18H32O4	-H(-)	100	(8E,10S,12Z)-10-Hydroperoxyoctadeca-8,12-dienoate	(8E,10S,12Z)-10-Hydroperoxyoctadeca-8,12-dienoate		C20703
467	313.051	TRUE	0.875069	38680.6	0.000691269	C10H19O7PS	-H(-)	100	Malaoxon	Malaoxon		C07498
468	313.072	TRUE	0.865849	27597.9	-0.000391189	C17H14O6	-H(-)	100	Ventinone A	1,4,5-Trihydroxy-7-methoxy-2,3-dimethylanthraquinone; Ventinone A		C10407
468	313.072	TRUE	0.865849	27597.9	-0.000391189	C17H14O6	-H(-)	100	Irisolidone	Irisolidone		C10471
468	313.072	TRUE	0.865849	27597.9	-0.000391189	C17H14O6	-H(-)	100	Pisatin	(+)-Pisatin; Pisatin		C10516
468	313.072	TRUE	0.865849	27597.9	-0.000391189	C17H14O6	-H(-)	100	6-Hydroxy-2-(4-hydroxyphenyl)-5,7-dimethoxy-4H-1-benzopyran-4-one	4',6-Dihydroxy-5,7-dimethoxyflavone; 6-Hydroxy-2-(4-hydroxyphenyl)-5,7-dimethoxy-4H-1-benzopyran-4-one		C15100
468	313.072	TRUE	0.865849	27597.9	-0.000391189	C17H14O6	-H(-)	100	Pinobanksin 3-O-acetate	Pinobanksin 3-O-acetate		C16418
468	313.072	TRUE	0.865849	27597.9	-0.000391189	C17H14O6	-H(-)	100	Aflatoxin B2	Aflatoxin B2		C16753
468	313.072	TRUE	0.865849	27597.9	-0.000391189	C17H14O6	-H(-)	100	4'-Methylcapillarisin	4'-Methylcapillarisin; 5,7-Dihydroxy-4',6-dimethoxyflavone		C17784
468	313.072	TRUE	0.865849	27597.9	-0.000391189	C17H14O6	-H(-)	100	7-Methylcapillarisin	7-Methylcapillarisin; Cirsimaritin; Scrophulein		C17785
468	313.072	TRUE	0.865849	27597.9	-0.000391189	C17H14O6	-H(-)	100	Aflatoxicol	AFL; Aflatoxicol		C19584
469	313.238	TRUE	0.87752	243570	0.000118068	C18H34O4	-H(-)	100	(9Z)-(7S,8S)-Dihydroxyoctadecenoic acid	(9Z)-(7S,8S)-Dihydroxyoctadecenoic acid; (Z)-(7S,8S)-Dihydroxyoctadeca-9-enoate; (Z)-(7S,8S)-Dihydroxyoctadeca-9-enoic acid		C07355
469	313.238	TRUE	0.87752	243570	0.000118068	C18H34O4	-H(-)	100	9,10-DHOME	(12Z)-9,10-Dihydroxyoctadec-12-enoic acid; 9,10-DHOA; 9,10-DHOME		C14828
469	313.238	TRUE	0.87752	243570	0.000118068	C18H34O4	-H(-)	100	12,13-DHOME	(9Z)-12,13-Dihydroxyoctadec-9-enoic acid; 12,13-DHOA; 12,13-DHOME		C14829
469	313.238	TRUE	0.87752	243570	0.000118068	C18H34O4	-H(-)	100	9,10-Epoxy-18-hydroxystearate	9,10-Epoxy-18-hydroxystearate		C19620
469	313.238	TRUE	0.87752	243570	0.000118068	C18H34O4	-H(-)	100	(8E,10S)-10-Hydroperoxyoctadeca-8-enoate	(8E,10S)-10-Hydroperoxy-8-octadecenoate; (8E,10S)-10-Hydroperoxyoctadeca-8-enoate		C20702
470	314.136	TRUE	0.916192	66843.9	4.83796e-05	C13H21N3O6	-H(-)	100	Clavamycin D	Clavamycin D		C17364
471	315.051	TRUE	0.885303	270440	3.60037e-05	C16H12O7	-H(-)	100	3-O-Methylquercetin	3',4',5,7-Tetrahydroxy-3-methoxyflavone; 3-Methoxy-5,7,3',4'-tetrahydroxyflavone; 3-O-Methylquercetin		C04443
471	315.051	TRUE	0.885303	270440	3.60037e-05	C16H12O7	-H(-)	100	Capillarisin	Capillarisin		C08999
471	315.051	TRUE	0.885303	270440	3.60037e-05	C16H12O7	-H(-)	100	Azaleatin	Azaleatin; Quercetin 5-methyl ether		C10022
471	315.051	TRUE	0.885303	270440	3.60037e-05	C16H12O7	-H(-)	100	Isorhamnetin	3-Methylquercetin; Isorhamnetin; Quercetin 3'-methyl ether		C10084
471	315.051	TRUE	0.885303	270440	3.60037e-05	C16H12O7	-H(-)	100	Pedalitin	3',4',5,6-Tetrahydroxy-7-methoxyflavone; Pedalitin		C10119
471	315.051	TRUE	0.885303	270440	3.60037e-05	C16H12O7	-H(-)	100	Pinoquercetin	6-C-Methylquercetin; Pinoquercetin		C10120
471	315.051	TRUE	0.885303	270440	3.60037e-05	C16H12O7	-H(-)	100	Rhamnetin	Quercetin 7-methyl ether; Rhamnetin		C10176
471	315.051	TRUE	0.885303	270440	3.60037e-05	C16H12O7	-H(-)	100	Sexangularetin	Herbacetin 8-methyl ether; Sexangularetin		C10185
471	315.051	TRUE	0.885303	270440	3.60037e-05	C16H12O7	-H(-)	100	Tamarixetin	Quercetin 4'-methyl ether; Tamarixetin		C10188
471	315.051	TRUE	0.885303	270440	3.60037e-05	C16H12O7	-H(-)	100	3'-O-Methyltricetin	3'-O-Methyltricetin; Selagin; Tricetin 3'-methyl ether		C19739
472	315.254	TRUE	0.873596	65936.3	0.000441535	C18H36O4	-H(-)	100	(9R,10R)-Dihydroxyoctadecanoic acid	(9R,10R)-Dihydroxyoctadecanoic acid; 9,10-Dihydroxystearic acid		C08314
472	315.254	TRUE	0.873596	65936.3	0.000441535	C18H36O4	-H(-)	100	(9S,10S)-9,10-Dihydroxyoctadecanoate	(9S,10S)-9,10-Dihydroxyoctadecanoate		C15988
472	315.254	TRUE	0.873596	65936.3	0.000441535	C18H36O4	-H(-)	100	9,10-Dihydroxystearate	9,10-Dihydroxystearate		C19622
473	317.03	TRUE	0.856937	89656.1	0.000108359	C15H10O8	-H(-)	100	Gossypetin	3,3',4',5,7,8-Hexahydroxyflavone; Gossypetin		C04109
473	317.03	TRUE	0.856937	89656.1	0.000108359	C15H10O8	-H(-)	100	Myricetin	3,5,7,3',4',5'-Hexahydroxyflavone; Myricetin		C10107
473	317.03	TRUE	0.856937	89656.1	0.000108359	C15H10O8	-H(-)	100	Quercetagetin	6-Hydroxyquercetin; Quercetagetin		C10122
474	318.093	TRUE	0.935553	23973.2	0.000853247	C11H17N3O8	-H(-)	100	Tetrodotoxin	TTX; Tetrodotoxin		C11692
475	319.046	TRUE	0.774517	20000.7	-0.000183195	C15H12O8	-H(-)	100	Dihydromyricetin	(+)-Ampelopsin; (+)-Dihydromyricetin; Ampelopsin; Dihydromyricetin		C02906
475	319.046	TRUE	0.774517	20000.7	-0.000183195	C15H12O8	-H(-)	100	2,3-Dihydrogossypetin	2,3-Dihydrogossypetin		C03052
475	319.046	TRUE	0.774517	20000.7	-0.000183195	C15H12O8	-H(-)	100	2,2',3-Trihydroxy-3'-methoxy-5,5'-dicarboxybiphenyl	2,2',3-Trihydroxy-3'-methoxy-5,5'-dicarboxybiphenyl		C18348
476	319.107	TRUE	0.905913	23675.7	-0.000271445	C17H22NOS2.	-H(-)	100	Timepidium bromide	Timepidium bromide; Timepidium bromide anhydrous		C12768
477	320.145	TRUE	0.929468	19303.1	0.00114626	C12H23N3O7	-H(-)	79	6'-Dehydro-6'-oxoparomamine	6'-Dehydro-6'-oxoparomamine; 6'-Dehydroparomamine; 6'-Oxoparomamine		C17583
478	321.024	TRUE	0.301127	51149.5	0.000846782	C14H10O9	-H(-)	100	Digallate	Digallate; Digallic acid		C01572
479	321.13	TRUE	0.939295	22506.4	-5.1289e-05	C12H22N2O8	-H(-)	100	2'-Deamino-2'-hydroxy-6'-dehydroparomamine	2'-Deamino-2'-hydroxy-6'-dehydroparomamine		C20351
480	321.172	TRUE	0.865707	23373.7	-0.000943103	C18H26O5	-H(-)	100	alpha-Zearalanol	Zeranol; alpha-Zearalanol		C14752
480	321.172	TRUE	0.865707	23373.7	-0.000943103	C18H26O5	-H(-)	100	beta-Zearalanol	Taleranol; beta-Zearalanol		C14753
481	321.208	TRUE	0.513358	9206.57	-0.000967008	C19H30O4	-H(-)	100	Rapanone	Rapanone		C10399
481	321.208	TRUE	0.513358	9206.57	-0.000967008	C19H30O4	-H(-)	100	Decylubiquinone	2,3-Dimethoxy-5-methyl-6-decyl-1,4-benzoquinone; 6-Decylubiquinone; Decylubiquinone		C15494
481	321.208	TRUE	0.513358	9206.57	-0.000967008	C19H30O4	-H(-)	100	[8]-Gingerol	(8)-Gingerol; [8]-Gingerol		C17495
481	321.208	TRUE	0.513358	9206.57	-0.000967008	C19H30O4	-H(-)	100	Monacolin L acid	Monacolin L acid		C20853
482	322.045	TRUE	0.953873	44084.2	9.84572e-06	C9H14N3O8P	-H(-)	100	CMP	CMP; Cytidine-5'-monophosphate; Cytidylic acid		C00055
482	322.045	TRUE	0.953873	44084.2	9.84572e-06	C9H14N3O8P	-H(-)	100	Cytidine 2'-phosphate	2'-Cytidylic acid; Cytidine 2'-monophosphate; Cytidine 2'-phosphate		C03104
482	322.045	TRUE	0.953873	44084.2	9.84572e-06	C9H14N3O8P	-H(-)	100	3'-CMP	3'-CMP; Cytidine 3'-phosphate		C05822
483	323.028	TRUE	0.976212	73510.2	0.000252105	C9H13N2O9P	-H(-)	100	UMP	5'Uridylic acid; UMP; Uridine 5'-monophosphate; Uridine monophosphate; Uridylic acid		C00105
483	323.028	TRUE	0.976212	73510.2	0.000252105	C9H13N2O9P	-H(-)	100	Pseudouridine 5'-phosphate	Pseudouridine 5'-phosphate		C01168
483	323.028	TRUE	0.976212	73510.2	0.000252105	C9H13N2O9P	-H(-)	100	3'-UMP	3'-UMP; Uridine 3'-monophosphate; Uridine 3'-phosphate		C01368
483	323.028	TRUE	0.976212	73510.2	0.000252105	C9H13N2O9P	-H(-)	100	Uridine 2'-phosphate	Uridine 2'-phosphate		C03031
484	323.098	TRUE	0.905175	46536	0.000203841	C12H20O10	-H(-)	100	Bis-D-fructose 2',1:2,1'-dianhydride	2,1' dianhydride; Bis-D-fructose 2',1:2,1'-dianhydride; Di-D-fructose 1,2'; Difructose anhydride I		C04333
484	323.098	TRUE	0.905175	46536	0.000203841	C12H20O10	-H(-)	100	D-Fructofuranose 1,2':2,3'-dianhydride	D-Fructofuranose 1,2':2,3'-dianhydride		C04420
485	323.146	TRUE	0.858342	22731.9	0.000377181	C12H24N2O8	-H(-)	100	Istamycin FU-10	Istamycin FU-10		C17981
485	323.146	TRUE	0.858342	22731.9	0.000377181	C12H24N2O8	-H(-)	100	2'-Deamino-2'-hydroxyparomamine	2'-Deamino-2'-hydroxyparomamine		C20353
486	323.17	TRUE	0.884785	17759.1	-0.00099075	C18H28O3S	-H(-)	100	Piperonyl sulfoxide	Piperonyl sulfoxide		C19147
486	323.17	TRUE	0.884785	17759.1	-0.000410916	C17H25NO5	-H(-) [+1]	65	Alloxydim	Alloxydim		C18772
487	324.073	TRUE	0.891675	12697.6	-0.000981185	C14H15NO8	-H(-)	100	Pancratistatin	Pancratistatin		C08535
488	325.093	TRUE	0.857652	21860.5	-0.000514063	C15H18O8	-H(-)	100	4-O-beta-D-Glucosyl-4-hydroxycinnamate	4-O-beta-D-Glucosyl-4-hydroxycinnamate		C04415
488	325.093	TRUE	0.857652	21860.5	-0.000514063	C15H18O8	-H(-)	100	trans-beta-D-Glucosyl-2-hydroxycinnamate	beta-D-Glucosyl-2-coumarate; trans-beta-D-Glucosyl-2-hydroxycinnamate		C05158
488	325.093	TRUE	0.857652	21860.5	-0.000514063	C15H18O8	-H(-)	100	cis-beta-D-Glucosyl-2-hydroxycinnamate	beta-D-Glucosyl-2-coumarinate; cis-beta-D-Glucosyl-2-hydroxycinnamate		C05839
488	325.093	TRUE	0.857652	21860.5	-0.000514063	C15H18O8	-H(-)	100	4'-O-beta-D-Glucosyl-cis-p-coumarate	4'-O-beta-D-Glucosyl-cis-p-coumarate		C06739
488	325.093	TRUE	0.857652	21860.5	-0.000514063	C15H18O8	-H(-)	100	Bilobalide	Bilobalide		C07605
488	325.093	TRUE	0.857652	21860.5	-0.000514063	C15H18O8	-H(-)	100	p-Coumaroyl-D-glucose	1-O-(4-Coumaroyl)-beta-D-glucose; 1-O-(4-Hydroxycinnamoyl)-beta-D-glucose; p-Coumaroyl-D-glucose		C16827
489	325.202	TRUE	0.875693	52176.6	0.000369747	C18H30O5	-H(-)	100	2,3-Dinor-8-iso prostaglandin F2alpha	2,3-Dinor-8-iso PGF2alpha; 2,3-Dinor-8-iso prostaglandin F2alpha		C14794
490	326.18	TRUE	0.892265	70462.9	2.66077e-05	C17H29NO3S	-H(-)	100	Sethoxydim	Sethoxydim		C18539
491	327.108	TRUE	0.894294	24711	0.000163152	C15H20O8	-H(-)	100	Anisatin	Anisatin		C09294
491	327.108	TRUE	0.894294	24711	0.000163152	C15H20O8	-H(-)	100	Paeonoside	Paeonoside		C10717
492	327.217	TRUE	0.868857	106321	0.000271869	C18H32O5	-H(-)	100	2,3-Dinor-8-iso prostaglandin F1alpha	2,3-Dinor-8-iso PGF1alpha; 2,3-Dinor-8-iso prostaglandin F1alpha		C14795
493	328.045	TRUE	0.96773	191624	-0.000381297	C10H20NO5PS2	-H(-)	100	Mecarbam	Mecarbam		C18661
493	328.045	TRUE	0.96773	191624	0.000106984	C10H12N5O6P	-H(-)	100	3',5'-Cyclic AMP	3',5'-Cyclic AMP; Adenosine 3',5'-cyclic phosphate; Adenosine 3',5'-phosphate; Cyclic AMP; Cyclic adenylic acid; cAMP		C00575
493	328.045	TRUE	0.96773	191624	0.000106984	C10H12N5O6P	-H(-)	100	2',3'-Cyclic AMP	2',3'-Cyclic AMP		C02353
493	328.045	TRUE	0.96773	191624	0.000106984	C10H12N5O6P	-H(-)	100	3',5'-Cyclic dGMP	3',5'-Cyclic dGMP		C02507
494	328.151	TRUE	0.886379	82215.1	0.000265711	C14H23N3O6	-H(-)	100	Valclavam	Valclavam		C06668
495	328.17	TRUE	0.931576	31834.5	0.000376982	C23H23NO	-H(-)	100	Trifenmorph	4-Tritylmorpholine; Trifenmorph		C19144
496	329.062	TRUE	0.849532	16030.4	0.00106967	C13H18N2O4S2	-H(-)	89	Penicillin O	Penicillin O		C17405
497	329.088	TRUE	0.843805	16525.8	-0.000198609	C14H18O9	-H(-)	100	1-O-Vanilloyl-beta-D-glucose	1-O-Vanilloyl-beta-D-glucose		C20470
498	329.233	TRUE	0.8655	116536	0.000769185	C18H34O5	-H(-)	100	9,12,13-TriHOME	(10E)-(9S,12S,13S)-9,12,13-Trihydroxyoctadec-10-enoic acid; 9(S),12(S),13(S)-Trihydroxy-10(E)-octadecenoic acid; 9,12,13-TriHOME		C14833
498	329.233	TRUE	0.8655	116536	0.000769185	C18H34O5	-H(-)	100	9,10,13-TriHOME	(11E)-9,10,13-Trihydroxyoctadec-11-enoic acid; 9,10,13-TriHOME; 9,10,13-Trihydroxyoctadec-11-enoic acid		C14835
498	329.233	TRUE	0.8655	116536	0.000769185	C18H34O5	-H(-)	100	9,10-Dihydroxy-12,13-epoxyoctadecanoate	9,10-Dihydroxy-12,13-epoxyoctadecanoate; 9,10-Dihydroxy-12,13-epoxyoctadecanoic acid		C14837
499	331.046	TRUE	0.884084	29091	-0.000774454	C10H13N4O7P	-H(-)	100	Purine mononucleotide	Purine mononucleotide		C05325
499	331.046	TRUE	0.884084	29091	-0.000774454	C10H13N4O7P	-H(-)	100	2'-Deoxyinosine 5'-phosphate	2'-Deoxyinosine 5'-phosphate; dIMP		C06196
499	331.046	TRUE	0.884084	29091	0.000235171	C16H12O8	-H(-)	100	Corniculatusin	3,3',4',5,7-Pentahydroxy-8-methoxyflavone; Corniculatusin		C04527
499	331.046	TRUE	0.884084	29091	0.000235171	C16H12O8	-H(-)	100	Patuletin	Patuletin; Quercetagetin 6-methyl ether		C10118
499	331.046	TRUE	0.884084	29091	0.000235171	C16H12O8	-H(-)	100	Laricitrin	3'-O-Methylmyricetin; Laricitrin		C12633
500	331.068	TRUE	0.839654	26147.2	-0.00063348	C13H16O10	-H(-)	100	1-O-Galloyl-beta-D-glucose	1-Galloyl-beta-D-glucose; 1-Galloyl-beta-glucose; 1-O-Galloyl-beta-D-glucose; beta-Glucogallin		C01158
501	331.126	TRUE	0.944133	68170.7	0.000176526	C12H20N4O7	-H(-)	100	Zanamivir	Zanamivir		C08095
502	331.248	TRUE	0.849395	11967	0.000526208	C18H36O5	-H(-)	100	9,10,18-Trihydroxystearate	9,10,18-Trihydroxystearate		C19621
503	332.162	TRUE	0.917497	45539	-6.74549e-05	C17H23N3O4	-H(-)	100	Primidolol	Primidolol		C11774
504	333.059	TRUE	0.928058	92896.4	-6.69827e-05	C9H19O11P	-H(-)	100	sn-Glycero-3-phospho-1-inositol	1-(sn-Glycero-3-phospho)-1D-myo-inositol; sn-Glycero-3-phospho-1-inositol		C01225
504	333.059	TRUE	0.928058	92896.4	-6.69827e-05	C9H19O11P	-H(-)	100	2-(alpha-D-Galactosyl)-sn-glycerol 3-phosphate	2-(alpha-D-Galactosyl)-sn-glycerol 3-phosphate		C04641
504	333.059	TRUE	0.928058	92896.4	-6.69827e-05	C9H19O11P	-H(-)	100	alpha-D-Galactosyl-(1,1')-sn-glycerol 3-phosphate	1-O-alpha-D-Galactosyl-sn-glycerol 3-phosphate; alpha-D-Galactosyl-(1,1')-sn-glycerol 3-phosphate		C04703
504	333.059	TRUE	0.928058	92896.4	-6.69827e-05	C9H19O11P	-H(-)	100	2-(beta-D-Glucosyl)-sn-glycerol 3-phosphate	2-(beta-D-Glucosyl)-sn-glycerol 3-phosphate		C10517
505	334.125	TRUE	0.874722	29430.7	0.000470191	C12H21N3O8	-H(-)	100	N4-(Acetyl-beta-D-glucosaminyl)asparagine	1-beta-Aspartyl-N-acetyl-D-glucosaminylamine; N4-(Acetyl-beta-D-glucosaminyl)asparagine; N4-(beta-N-Acetyl-D-glucosaminyl)-L-asparagine		C04540
506	335.093	TRUE	0.83162	27289.4	-0.000444219	C20H16O5	-H(-)	100	Psoralidin	Psoralidin		C10523
506	335.093	TRUE	0.83162	27289.4	-0.000444219	C20H16O5	-H(-)	100	Sojagol	Sojagol		C10529
507	335.11	TRUE	0.795856	18120.1	-0.000334892	C12H20N2O9	-H(-)	100	3-Epihydroxymugineic acid	3-Epihydroxymugineic acid		C15501
508	336.131	TRUE	0.933606	19457	-0.000785372	C13H23NO9	-H(-)	100	Streptobiosamine	Streptobiosamine		C07655
509	336.167	TRUE	0.921418	24487.4	0.000556639	C15H23N5O4	-H(-)	100	Kyotorphin	Kyotorphin; L-Tyrosyl-L-arginine		C02993
510	337.077	TRUE	0.85776	29774.9	0.000893162	C12H18O11	-H(-)	100	L-Ascorbic acid-2-glucoside	AA-2G; L-Ascorbic acid-2-glucoside		C18339
511	337.093	TRUE	0.839355	26547.7	0.000204297	C16H18O8	-H(-)	100	1-Caffeoyl-4-deoxyquinic acid	1-Caffeoyl-4-deoxyquinic acid		C10432
511	337.093	TRUE	0.839355	26547.7	0.000204297	C16H18O8	-H(-)	100	4-p-Coumaroylquinic acid	4-p-Coumaroylquinic acid		C10441
511	337.093	TRUE	0.839355	26547.7	0.000204297	C16H18O8	-H(-)	100	p-Coumaroyl quinic acid	p-Coumaroyl quinic acid; trans-5-O-(4-Coumaroyl)-D-quinate		C12208
512	338.173	TRUE	0.893547	34991.9	-0.000773756	C16H25N3O5	-H(-)	100	Xamoterol	Xamoterol		C11775
513	338.989	TRUE	0.909366	36155.4	0.000163771	C6H14O12P2	-H(-)	100	D-Fructose 1,6-bisphosphate	D-Fructose 1,6-bisphosphate		C00354
513	338.989	TRUE	0.909366	36155.4	0.000163771	C6H14O12P2	-H(-)	100	beta-D-Fructose 2,6-bisphosphate	D-Fructose 2,6-bisphosphate; beta-D-Fructose 2,6-bisphosphate		C00665
513	338.989	TRUE	0.909366	36155.4	0.000163771	C6H14O12P2	-H(-)	100	1D-myo-Inositol 1,4-bisphosphate	1D-myo-Inositol 1,4-bisphosphate; D-myo-Inositol 1,4-bisphosphate; Inositol 1,4-bisphosphate; myo-Inositol 1,4-bisphosphate		C01220
513	338.989	TRUE	0.909366	36155.4	0.000163771	C6H14O12P2	-H(-)	100	alpha-D-Glucose 1,6-bisphosphate	D-Glucose 1,6-bisphosphate; alpha-D-Glucose 1,6-biphosphate; alpha-D-Glucose 1,6-bisphosphate		C01231
513	338.989	TRUE	0.909366	36155.4	0.000163771	C6H14O12P2	-H(-)	100	D-Mannose 1,6-bisphosphate	D-Mannose 1,6-bisphosphate		C03693
513	338.989	TRUE	0.909366	36155.4	0.000163771	C6H14O12P2	-H(-)	100	D-Tagatose 1,6-bisphosphate	D-Tagatose 1,6-bisphosphate		C03785
513	338.989	TRUE	0.909366	36155.4	0.000163771	C6H14O12P2	-H(-)	100	D-myo-Inositol 1,3-bisphosphate	1D-myo-Inositol 1,3-bisphosphate; D-myo-Inositol 1,3-bisphosphate; Inositol 1,3-bisphosphate; myo-Inositol 1,3-bisphosphate		C04062
513	338.989	TRUE	0.909366	36155.4	0.000163771	C6H14O12P2	-H(-)	100	D-myo-Inositol 3,4-bisphosphate	1D-myo-Inositol 3,4-bisphosphate; D-myo-Inositol 3,4-bisphosphate; Inositol 3,4-bisphosphate		C04063
513	338.989	TRUE	0.909366	36155.4	0.000163771	C6H14O12P2	-H(-)	100	D-myo-Inositol 4,5-bisphosphate	D-myo-Inositol 4,5-bisphosphate		C04064
513	338.989	TRUE	0.909366	36155.4	0.000163771	C6H14O12P2	-H(-)	100	beta-D-Fructose 1,6-bisphosphate	beta-D-Fructose 1,6-bisphosphate		C05378
514	339.05	TRUE	0.791775	17208.7	0.000550937	C18H12O7	-H(-)	100	Versicolorin B	Versicolorin B		C20575
514	339.05	TRUE	0.791775	17208.7	0.000558927	C10H17N3O6S2	-H(-) [+1]	65	S-Sulfanylglutathione	Glutathione hydrodisulfide; S-Sulfanylglutathione		C17267
515	339.093	TRUE	0.917114	34866.8	0.000699762	C12H20O11	-H(-)	100	Cellobiono-1,5-lactone	Cellobiono-1,5-lactone; Cellobionolactone; Cellobiose-1,5-lactone		C01093
515	339.093	TRUE	0.917114	34866.8	0.000699762	C12H20O11	-H(-)	100	3-Ketolactose	3-Ketolactose		C05403
515	339.093	TRUE	0.917114	34866.8	0.000699762	C12H20O11	-H(-)	100	3-Ketosucrose	3-Dehydro-alpha-D-glucosyl-beta-D-fructofuranoside; 3-Ketosucrose		C05731
516	339.141	TRUE	0.898097	23507.8	-5.75017e-05	C12H24N2O9	-H(-)	100	Fortimicin FU-10	Fortimicin FU-10		C17971
517	339.327	TRUE	0.262277	17829.2	0.000332554	C22H44O2	-H(-)	100	Docosanoic acid	Behenic acid; Docosanoate; Docosanoic acid		C08281
518	340.047	TRUE	0.852452	19014.3	-0.000303602	C17H11NO7	-H(-)	100	Aristolochic acid	Aristolochic acid; Aristolochic acid I		C08469
519	340.125	TRUE	0.876452	29524.6	-0.000446834	C12H23NO10	-H(-)	100	6-(alpha-D-Glucosaminyl)-1D-myo-inositol	6-(alpha-D-Glucosaminyl)-1D-myo-inositol		C15658
519	340.125	TRUE	0.876452	29524.6	-0.000446834	C12H23NO10	-H(-)	100	1-O-(2-Amino-2-deoxy-alpha-D-glucopyranosyl)-1D-myo-inositol	1-O-(2-Amino-2-deoxy-alpha-D-glucopyranosyl)-1D-myo-inositol		C19702
520	341.038	TRUE	0.931021	26092.7	0.000566059	C12H14N4O4S2	-H(-)	100	Thiophanate-methyl	1,2-Di-(3-methoxycarbonyl-2-thioureido)benzene; Thiophanate-methyl		C14432
521	341.109	TRUE	0.991893	950248	0.000152313	C12H22O11	-H(-)	100	Sucrose	1-alpha-D-Glucopyranosyl-2-beta-D-fructofuranoside; Cane sugar; Saccharose; Sucrose		C00089
521	341.109	TRUE	0.991893	950248	0.000152313	C12H22O11	-H(-)	100	Cellobiose	1-beta-D-Glucopyranosyl-4-D-glucopyranose; Cellobiose		C00185
521	341.109	TRUE	0.991893	950248	0.000152313	C12H22O11	-H(-)	100	Maltose	Malt sugar; Maltose; alpha-D-Glucopyranosyl-(1->4)-D-glucopyranose		C00208
521	341.109	TRUE	0.991893	950248	0.000152313	C12H22O11	-H(-)	100	Lactose	1-beta-D-Galactopyranosyl-4-D-glucopyranose; Lactose; Milk sugar; beta-D-Gal-(1->4)-D-Glc		C00243
521	341.109	TRUE	0.991893	950248	0.000152313	C12H22O11	-H(-)	100	Isomaltose	Brachiose; Isomaltose		C00252
521	341.109	TRUE	0.991893	950248	0.000152313	C12H22O11	-H(-)	100	alpha-Maltose	alpha-Malt sugar; alpha-Maltose		C00897
521	341.109	TRUE	0.991893	950248	0.000152313	C12H22O11	-H(-)	100	alpha,alpha-Trehalose	Trehalose; alpha,alpha'-Trehalose; alpha,alpha-Trehalose		C01083
521	341.109	TRUE	0.991893	950248	0.000152313	C12H22O11	-H(-)	100	alpha-D-Galactosyl-(1->3)-1D-myo-inositol	1-alpha-D-Galactosyl-myo-inositol; 3-O-alpha-D-Galactosyl-1D-myo-inositol; Galactinol; O-alpha-D-Galactosyl-(1->3)-1D-myo-inositol; alpha-D-Galactosyl-(1->3)-1D-myo-inositol		C01235
521	341.109	TRUE	0.991893	950248	0.000152313	C12H22O11	-H(-)	100	Nigerose	3-O-alpha-D-Glucopyranosyl-D-glucose; Nigerose; Sakebiose		C01518
521	341.109	TRUE	0.991893	950248	0.000152313	C12H22O11	-H(-)	100	Inulobiose	1-O-beta-D-Fructo-furanosyl-D-fructose; Inulobiose		C01711
521	341.109	TRUE	0.991893	950248	0.000152313	C12H22O11	-H(-)	100	Levanbiose	Levanbiose		C01725
[truncated: 313 more rows]

## Sheet: UM_Data ion intensities
Ion_ID	F5_183_PE_T0_1_F5_183_PE	F5_183_PE_T0_2_F5_183_PE	F5_183_PE_T0_3_F5_183_PE	F5_183_PE_T0_4_F5_183_PE	F5_183_PE_T0_5_F5_183_PE	F5_183_PE_T16_1_F5_183_PE	F5_183_PE_T16_2_F5_183_PE	F5_183_PE_T16_3_F5_183_PE	F5_183_PE_T16_4_F5_183_PE	F5_183_PE_T16_5_F5_183_PE	F5_184_PE_T0_1_F5_184_PE	F5_184_PE_T0_2_F5_184_PE	F5_184_PE_T0_3_F5_184_PE	F5_184_PE_T0_4_F5_184_PE	F5_184_PE_T0_5_F5_184_PE	F5_184_PE_T16_1_F5_184_PE	F5_184_PE_T16_2_F5_184_PE	F5_184_PE_T16_3_F5_184_PE	F5_184_PE_T16_4_F5_184_PE	F5_184_PE_T16_5_F5_184_PE	F5_185_PE_T0_1_F5_185_PE	F5_185_PE_T0_2_F5_185_PE	F5_185_PE_T0_3_F5_185_PE	F5_185_PE_T0_4_F5_185_PE	F5_185_PE_T0_5_F5_185_PE	F5_185_PE_T16_1_F5_185_PE	F5_185_PE_T16_2_F5_185_PE	F5_185_PE_T16_3_F5_185_PE	F5_185_PE_T16_4_F5_185_PE	F5_185_PE_T16_5_F5_185_PE	F5_186_PE_T0_1_F5_186_PE	F5_186_PE_T0_2_F5_186_PE	F5_186_PE_T0_3_F5_186_PE	F5_186_PE_T0_4_F5_186_PE	F5_186_PE_T0_5_F5_186_PE	F5_186_PE_T16_1_F5_186_PE	F5_186_PE_T16_2_F5_186_PE	F5_186_PE_T16_3_F5_186_PE	F5_186_PE_T16_4_F5_186_PE	F5_186_PE_T16_5_F5_186_PE
[truncated: 657 more rows]

[truncated: 5 more sheets: UM_Rutin_suppl all ions, UM_Rutin alternative annot, UM_Rutin_suppl_ion intensities, STM_Raw_responses, STM_Data all ions_]
