# Supplementary figures and images for: Niche partitioning facilitates coexistence of closely related honey bee gut bacteria
Source: eLife journal article supplement (doi:10.7554/elife.68583), 2021-07-19

### A. Glucose

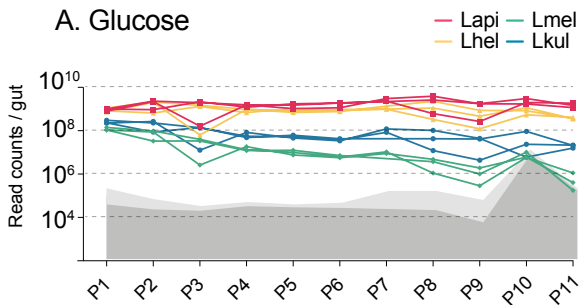

### B. Pollen extract

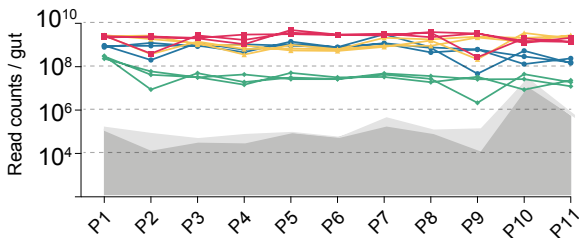

### C. Pollen grains

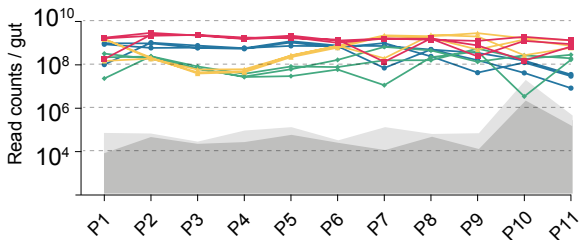

Supplement: supp [file elife-68583-supp-v2.zip]

● Sugar water    ● Sugar water + Pollen grains

Lapi

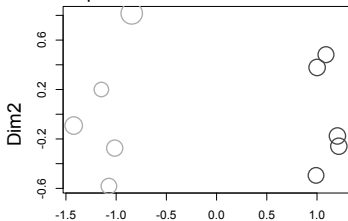

Lhel

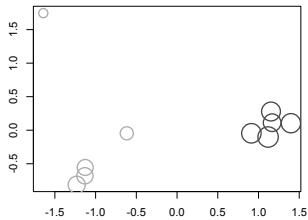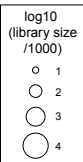

Lmel

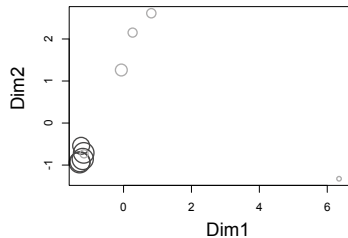

Lkul

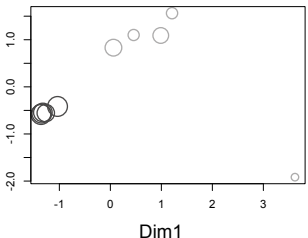

Supplement: supp [file elife-68583-supp-v2.zip]

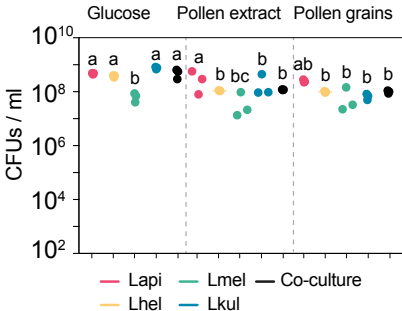

Supplement: supp [file elife-68583-supp-v2.zip]

# Malate

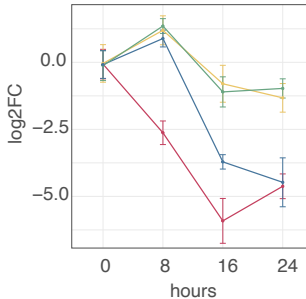

# D-Allose

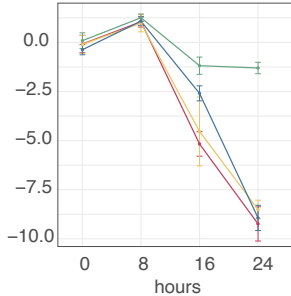

# D-Mannose

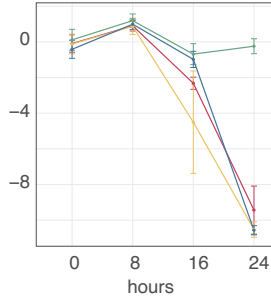

— Lapi
 — Lmel  
— Lhel
 — Lkul

Supplement: supp [file elife-68583-supp-v2.zip]

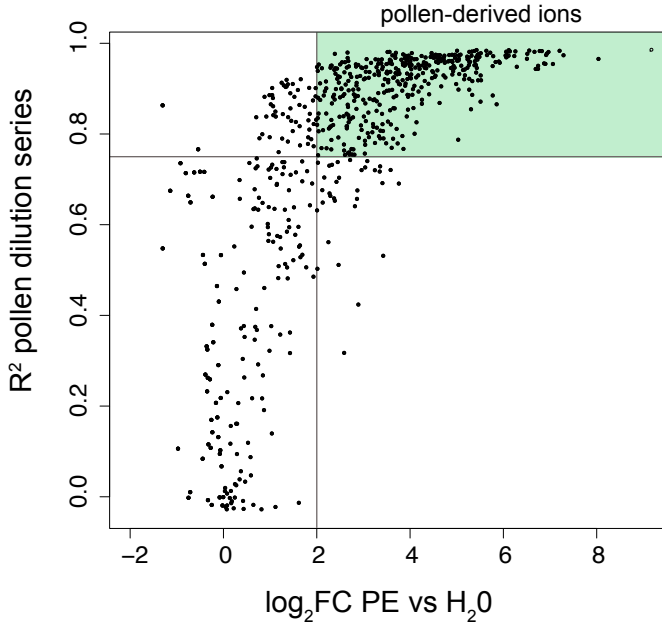

Supplement: supp [file elife-68583-supp-v2.zip]

● Glucose ● Pollen extract

*Lapi*

*Lhel*

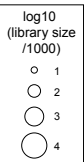

*Lmel*

*Lkul*

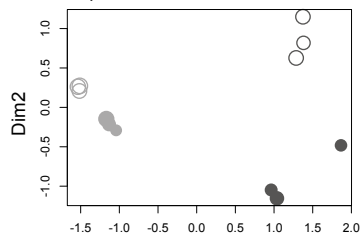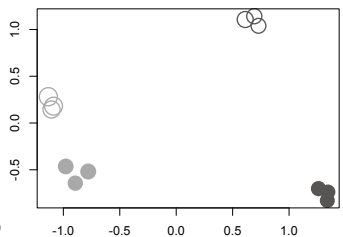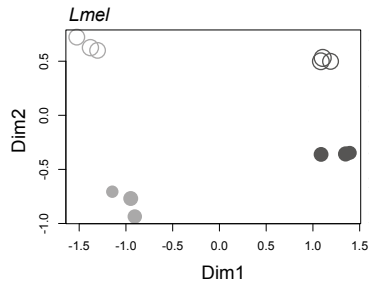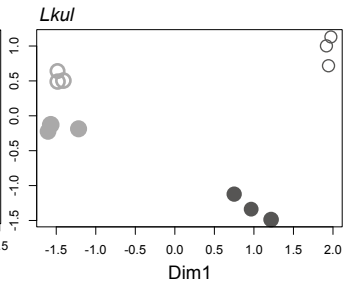

Supplement: supp [file elife-68583-supp-v2.zip]

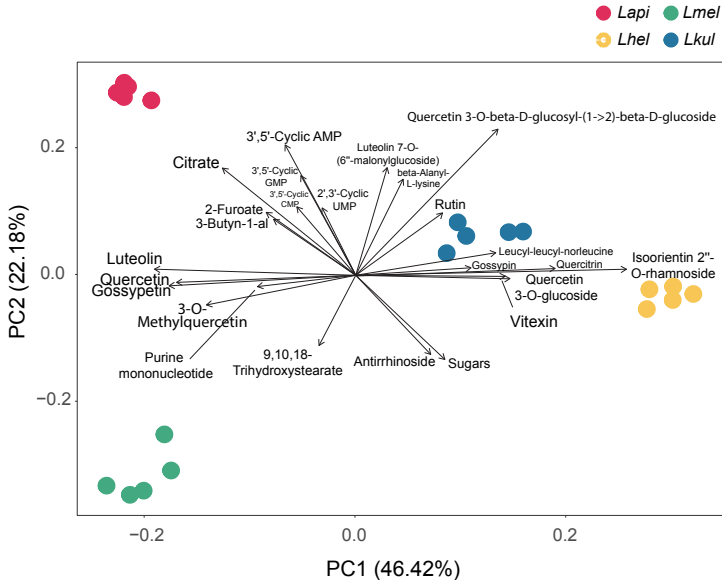

Supplement: supp [file elife-68583-supp-v2.zip]

Lapi

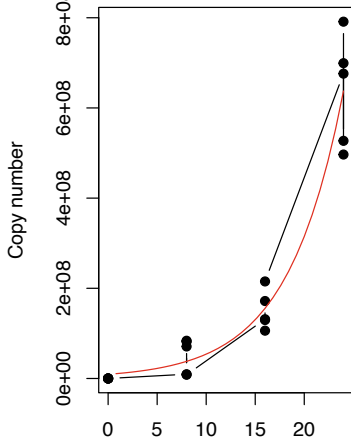

Lhel

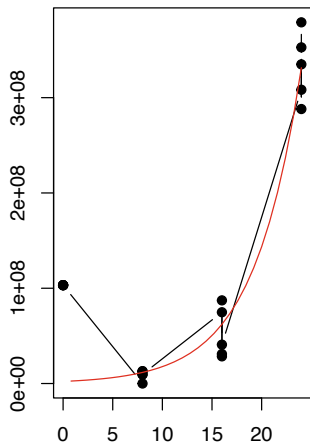

Lmel

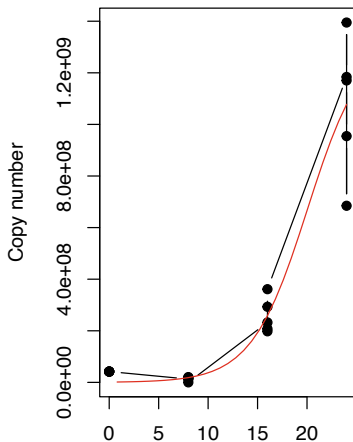

Lkul

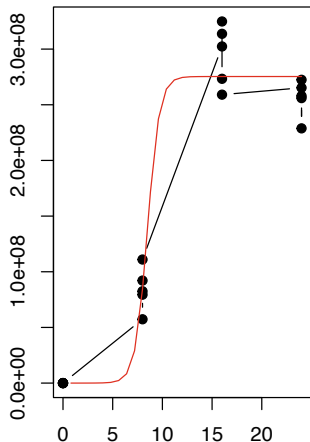

Supplement: supp [file elife-68583-supp-v2.zip]
